# Supplementary material for: Suppressed prefrontal neuronal firing variability and impaired social representation in IRSp53-mutant mice
Source: eLife. 2022 Nov 1;11:e74998. doi: 10.7554/eLife.74998 (PMC9662818; doi:10.7554/eLife.74998)
Supplement: Figure 1—figure supplement 2—source data 1. — The excel file contains the numerical data used to generate Figure 1—figure supplement 2A–G. [file elife-74998-fig1-figsupp2-data1.xlsx]

## Sheet: Fig1_S2
	Fig 1_S2A					Fig 1_S2B					Fig 1_S2C
	WT		KO			WT		KO			WT		KO
	Left	Right	Left	Right		Social	Object	Social	Object		Social	Object	Social	Object
	82.5011	233.028	144.188	131.535		233.645	131.905	200.082	130.135		104.545	280.1	135.656	126.611
	176.812	156.151	83.3446	69.1892		200.971	144.29	114.58	71.4053		127.188	149.353	79.0418	39.4876
	115.092	186.666	219.737	138.2		180.439	115.268	211.351	195.537		136.138	127.866	234.862	156.05
	172.432	148.766	83.7008	67.8124		223.852	95.638	132.59	94.269		112.993	134.258	85.7028	135.881
	129.813	221.103	166.102	159.987		214.478	122.907	97.9143	128.757		156.583	108.524	155.409	111.128
	148.547	148.354	124.129	159.437		198.322	134.843	101.884	64.7349		159.706	127.51	93.9074	65.3094
			181.855	109.603				163.398	200.29				180.56	91.0232
			68.1948	59.1456				124.139	53.1065				111.33	72.4688
	Fig 1_S2D													Fig 1_S2E													Fig 1_S2F							Fig 1_S2G
	WT						KO							WT						KO							WT			KO				WT			KO
	L	R	First S	First O	Second S	Second O	L	R	First S	First O	Second S	Second O		L	R	First S	First O	Second S	Second O	L	R	First S	First O	Second S	Second O		E-E	First S-O	Second S-O	E-E	First S-O	Second S-O		Trial 1	Trial 5	Trial 10	Trial 1	Trial 5	Trial 10
	10	14	8	3	3	7	10	8	7	7	11	8		8.69203	12.1979	23.0147	10.8219	10.0656	31.9272	11.8952	12.4082	24.229	9.44754	11.7997	7.87871		1562.61	1278.43	1292.64	2103.66	2168.26	1625.51		2551.29	3607.86	6241.89	6571.27	3220.3	7900.69
	14	10	16	7	5	15	7	12	5	11	14	10		10.6893	15.1818	10.1101	13.2895	6.01268	18.9768	13.5564	8.49739	23.3767	8.60558	5.53172	10.2536		2213.09	1591.52	1540.53	2677.01	2235.02	2059.66		4488.06	5252.27	6295.09	13172.9	4252.34	3489.78
	10	14	8	7	3	11	31	18	23	25	7	4		8.04137	18.652	42.4216	6.30631	3.02525	34.9895	2.99332	3.44604	2.68529	2.93627	4.74284	3.07808		1799.97	1184.62	853.818	1979.78	1453.56	1322.47		3531.42	4582.69	3401.11	2227.83	4867.82	7171.77
	6	13	6	9	7	7	3	16	2	7	21	2		3.70926	14.5966	5.48326	26.6155	9.44754	24.229	13.3578	7.1655	6.18952	9.53334	5.39587	8.37504		968.735	852.607	674.313	1618.62	875.107	793.864		2537.03	2435.24	2514.69	3563.64	2170.81	4128.33
	12	16	5	4	7	10	6	11	6	15	13	9		5.17462	12.2831	70.5506	9.81815	4.59984	39.6096	11.7395	6.50954	21.1879	6.52875	4.67904	7.34809		1163.84	927.474	1010.4	1378.33	1318.4	913.022		2190.56	4125.37	2989.2	3235.58	3336.06	4257.6
	19	22	13	14	10	6	13	6	7	10	11	6		4.91895	6.90539	4.8125	4.59507	7.72105	8.81993	10.146	10.9721	11.0015	9.55289	15.0999	4.23757		1451.32	966.455	1181.12	674.976	598.114	376.246		2091.51	4054.89	4650.29	1534.15	1956.05	1457.8
	8	13	11	7	6	10	10	4	17	14	3	3		4.9049	10.2128	36.215	2.717	2.78056	29.3227	7.53754	8.12479	10.9835	6.37066	3.9039	8.97564					1587.55	651.561	684.163					1777.51	3978.66	3013.66
	12	17	11	16	16	15	8	4	6	3	1	4		3.35891	9.17584	3.86144	15.1506	12.5667	8.25715	6.66083	8.78378	59.2593	3.58136	14.0807	16.1912					1094.32	595.596	752.7					1571.86	2681.78	3074.21
	18	17	11	14	15	7	8	11	12	9	7	11		7.42594	8.61253	16.2981	6.40879	10.5594	7.82211	5.664	5.43877	6.3508	7.33697	5.78674	4.69864
	16	12	15	13	11	12	19	8	5	10	3	2		9.36144	9.2815	10.2747	7.33297	12.6915	8.12757	3.70546	5.29279	8.86887	4.38105	12.4569	8.50851
	21	16	22	11	8	16	7	4	9	3	1	1		8.77862	7.42201	10.054	5.33261	15.0108	15.8283	2.37857	5.83083	4.63056	5.75019	12.3457	18.4852
	17	17	14	11	19	12	14	14	18	7	6	6		8.61253	11.4801	13.5802	14.7632	9.62541	7.3518	5.01692	9.09719	5.82434	7.60761	5.70014	5.52775
	23	19	17	20	21	18	33	15	18	15	3	10		6.83872	9.20394	11.5625	7.1021	4.80798	6.64739	4.02423	4.03515	5.77429	5.2319	7.40741	7.84785
	27	19	20	12	8	20	7	8	3	9	8	3		8.10316	6.25011	7.35903	6.84573	7.75359	8.67534	3.33667	3.85802	11.1445	5.65751	3.24491	4.97164
	24	21	18	20	24	13	13	10	5	12	13	6		9.4108	6.4366	9.72639	10.1585	5.18713	6.65794	11.3318	13.4134	27.9479	13.3439	9.64041	8.65866
	21	17	14	17	17	10	12	13	9	8	13	9		5.87095	7.62135	11.1969	9.37015	4.91668	5.66233	11.4253	11.3832	23.5606	4.05822	24.1318	3.97064
	21	22	24	19	19	18	9	11	6	7	11	11		6.82428	5.51916	6.58714	6.66632	6.46085	9.76532	14.4663	13.3163	25.7813	17.4699	21.2698	9.77038
	23	26	26	17	8	24	10	5	7	6	3	7		6.03212	5.09484	5.61587	5.29157	4.60043	5.55277	20.1969	16.7367	19.7531	51.2179	10.2547	49.0872
	8	16	10	2	8	2	13	9	14	15	8	13		7.92042	10.9735	10.5205	82.9329	28.2991	8.00801	12.7486	9.32785	11.1826	11.5026	10.352	8.60861
	16	18	3	14	16	12	12	13	12	4	5	4		6.05189	7.24057	4.11523	7.48367	5.82457	6.00879	8.03025	8.52391	7.44912	11.036	23.9173	6.92359
	15	16	16	7	9	11	12	14	9	8	13	12		5.46547	7.29062	7.38238	7.78397	7.62614	6.96454	9.9822	17.4675	9.89508	45.4872	10.5054	9.66522
	16	20	13	21	22	10	13	15	11	15	10	6		7.38864	4.92659	5.03067	5.51822	5.97264	6.22623	10.1794	9.46725	16.8108	10.2035	20.0667	12.2345
	19	20	15	19	24	18	21	14	15	10	11	11		7.16506	8.60194	4.61573	11.0883	6.61773	6.0301	6.71783	10.6988	13.6047	13.7304	8.50548	13.6712
	17	20	17	14	21	16	10	11	15	11	12	5		7.09729	5.65065	6.48884	11.6879	7.38834	9.34685	33.9139	8.51761	13.102	17.8269	18.1709	8.34835
	18	23	16	8	9	13	17	15	9	13	6	7		6.41197	7.85858	15.1005	7.74107	5.4536	4.84074	7.55461	6.86242	12.2048	7.62814	11.8285	6.75437
	18	17	15	6	10	12	17	10	16	5	1	3		7.28506	7.90987	14.5946	9.89879	7.7711	17.3562	7.98642	7.71104	10.3624	10.1568	2.56924	5.10511
	13	25	19	7	1	7	4	10	5	11	5	8		7.26111	7.45546	10.1856	16.0637	11.3113	6.09657	8.58358	8.67534	5.40541	7.11317	8.26827	8.74208
	13	10	12	2	6	11	19	10	9	2	8	5		8.72154	8.44845	23.6431	7.64097	14.9538	9.57321	4.51153	3.75042	12.4124	161.128	15.0317	12.6927
	8	6	6	6	13	6	10	2	2	6	9	11		10.2394	7.7522	14.876	12.0621	16.0853	10.6495	4.51785	2.38572	3.72039	4.72139	11.1519	7.04947
	10	20	19	13	13	18	3	15	15	16	12	11		10.5372	8.12813	10.6633	3.3495	10.9006	6.94398	2.42465	3.56801	3.94172	3.69745	7.27116	15.9553
	18	20	6	20	26	7	8	9	3	7	9	8		7.79483	5.11678	16.244	8.02135	5.27066	2.83617	5.40958	4.72324	6.51763	2.4739	6.76973	4.7631
	23	20	19	7	7	25	10	20	19	6	16	16		4.55093	6.10444	8.87203	7.94127	12.4219	6.67201	3.36336	3.28662	4.60987	5.03281	6.36261	4.4482
	12	19	17	8	17	16	13	21	16	15	10	12		11.8007	7.00174	8.77544	13.1215	5.42307	6.18952	3.3033	4.16448	6.06231	6.47536	5.28862	12.012
	16	17	22	19	20	19	8	9	5	7	16	3		6.30839	7.20524	5.39479	7.35648	4.53453	5.72327	5.9351	5.52775	10.5906	3.2461	5.47422	8.94228
	21	16	10	19	22	18	19	16	7	9	19	15		5.63262	5.78078	9.14581	11.9014	5.61471	8.79213	9.16355	8.13939	3.6322	5.702	7.0193	6.73562
	21	19	21	24	16	21	16	18	9	14	17	18		6.52398	5.97088	5.07651	7.80503	4.80063	9.80345	6.63789	6.8031	3.84829	15.5751	6.59876	8.03767
	11	5	21	7	3	13	21	14	11	9	14	5		9.94328	6.04605	4.3329	5.81057	5.76132	11.0187	6.73054	8.11287	5.70571	2.78056	15.5894	4.62462
	5	13	11	2	1	15	20	17	15	12	15	14		8.28161	11.6912	25.571	12.0621	8.74208	8.83995	8.0714	8.26905	6.29074	10.1852	6.23068	9.90514
	10	4	12	14	16	4	23	21	20	19	18	13		34.1275	6.71505	13.1493	3.90152	20.7749	2.72773	7.31021	8.38458	5.28195	7.25814	6.70485	10.4694
	14	4	17	4	18	8	22	17	2	8	19	6		18.0085	8.5669	17.9297	6.27294	8.96267	7.78695	7.89122	7.01093	12.8462	12.2164	8.21348	5.58336
	18	5	16	6	1	20	16	16	9	11	9	7		16.3497	5.55889	16.7876	9.64298	3.97064	12.1004	9.37187	13.4655	14.9668	11.2476	9.35751	9.90991
	6	13	6	3	20	4	19	18	8	16	11	14		5.29974	23.3259	44.9783	8.66422	6.84351	9.74308	5.87254	6.73451	7.51168	4.93827	3.85537	6.73531
	6	22	6	11	8	12	28	26	26	23	15	19		9.63185	9.25623	17.423	23.6752	10.0392	14.9705	5.16826	7.91047	5.81351	6.76474	5.00056	6.13069
	19	17	2	15	22	1	10	9	2	6	10	3		7.25814	7.38974	2.15215	6.97586	9.18039	19.0524	6.0327	12.2085	37.8545	3.7037	7.01034	6.57324
	8	10	4	6	8	9	14	16	6	7	7	5		9.62212	10.1068	16.1161	26.9102	7.77027	21.9219	5.64136	6.95696	8.3528	9.33791	8.47038	4.13747
	15	11	15	18	11	11	14	11	3	8	1	3		12.0676	6.99791	6.25959	10.1138	8.16574	6.18497	6.10849	6.40641	16.65	4.36687	18.2516	1.71282
	7	15	10	11	14	8	14	19	1	1	5	1		11.9548	9.39829	11.5082	11.2931	7.50036	5.58892	5.87016	6.65227	5.37204	1.13447	17.3974	4.1041
	12	6	20	7	14	4	10	12	8	4	4	5		13.2605	16.8446	13.969	4.6761	6.11326	7.20721	6.60327	6.62607	15.3946	5.13847	3.14481	14.341
	11	11	17	9	19	13	23	27	14	14	2	5		7.99891	12.012	14.277	8.9052	8.33641	6.73237	4.70761	5.15824	8.39888	6.56847	4.68802	6.84685
	12	16	16	9	13	15	18	23	8	8	9	12		10.1768	9.14456	17.5551	4.1041	9.05008	8.2438	5.8021	9.48195	8.90474	11.474	7.89308	9.32877
	17	17	23	11	19	13	16	18	7	11	14	7		8.60272	10.4575	11.5666	6.23654	5.92874	9.37604	7.12796	5.8021	17.7845	5.62077	4.49974	9.42848
	15	15	17	14	22	14	21	25	16	12	18	17		8.93338	11.5604	12.6381	10.3413	7.69709	7.31922	7.43919	6.0981	7.33233	5.07174	6.41753	4.75377
	17	21	17	8	17	13	15	17	10	6	12	5		7.24254	8.58636	11.7353	7.21138	6.08648	8.41354	8.96674	10.6243	8.35836	6.37304	9.01457	7.48749
	9	9	14	8	24	5	16	22	19	11	11	13		13.4431	25.5366	11.2589	12.5584	9.99611	5.49883	6.81932	8.21276	8.64549	8.99081	7.17991	11.4884
	10	20	21	5	8	16	14	14	7	8	19	5		8.90224	13.0097	10.1196	16.4698	6.46063	6.40432	14.7481	8.83979	9.28548	4.67551	5.60385	3.74374
	7	16	7	12	15	3	16	22	6	6	20	12		8.07474	12.9442	8.05091	16.5304	8.06362	10.6106	5.88922	11.0686	15.5378	6.63997	4.56957	4.58514
	11	16	12	12	11	13	20	23	11	15	13	10		15.3729	9.06532	9.49561	11.8619	10.7683	8.36991	6.30631	6.92432	11.7299	9.28706	6.98904	7.45078
							5	1	2	2	4	3								7.41408	6.90691	38.9056	9.42609	13.8972	11.8229
							6	12	9	7	8	6								12.151	6.20621	18.9634	24.3434	12.4458	30.3693
							9	16	8	11	9	8								5.89849	8.23949	16.162	8.15361	8.10069	5.42209
							12	8	6	12	9	5								9.87932	8.12479	22.2167	14.4394	12.0862	7.18051
							11	9	5	3	9	13								21.7096	5.9022	14.0607	5.71683	9.8543	7.59477
							17	15	13	13	6	10								8.9305	11.2357	12.0941	9.22461	8.04137	11.6617
							13	11	8	6	10	12								11.378	6.47314	11.8869	70.7152	25.5322	8.63919
							13	13	7	7	8	6								10.3822	8.36221	49.2731	22.3033	41.6291	15.6101
							21	10	15	9	15	9								8.11446	5.53887	15.9337	5.65009	9.75642	5.10511
							11	13	7	5	9	6								8.92711	7.54344	11.5639	18.0581	41.0151	5.02169
							18	15	13	15	13	12								10.7478	7.49861	8.39814	15.5667	26.062	4.5629
							17	15	6	7	9	11								14.7442	6.98699	16.1106	43.3624	9.49097	11.5085
