# Supplementary material for: Suppressed prefrontal neuronal firing variability and impaired social representation in IRSp53-mutant mice
Source: eLife. 2022 Nov 1;11:e74998. doi: 10.7554/eLife.74998 (PMC9662818; doi:10.7554/eLife.74998)
Supplement: Figure 1—figure supplement 3—source data 1. — The excel file contains the numerical data used to generate Figure 1—figure supplement 3A and B. [file elife-74998-fig1-figsupp3-data1.xlsx]

## Sheet: Fig1_S3
	Figure 1_S3A														Figure 1_S3B
	WT			KO				WT			KO				WT		KO			WT		KO
	Proximal	Distal	None	Proximal	Distal	None		Proximal	Distal	None	Proximal	Distal	None		Proximal	Distal	Proximal	Distal		Proximal	Distal	Proximal	Distal
	31.2656	64.6822	4.05215	50.0858	49.9142	0		47.3934	52.6066	0	39.3683	60.6317	0		71.113	28.887	48.9893	51.0107		50.7907	49.2093	11.5942	88.4058
	44.6919	55.3081	0	41.7618	56.9997	1.23852		42.5181	57.2182	0.263678	48.1203	51.8797	0		50.1225	49.8775	32.1962	67.8038		75.04	24.96	40.2214	59.7786
	18.6048	79.6268	1.7684	46.7989	53.2011	0		41.1168	56.3452	2.53807	12.8329	86.4407	0.726392		44.0627	55.9373	32.8244	67.1756		7.94729	92.0527	21.7116	78.2884
	64.8328	35.1672	0	45.4545	52.0786	2.46688		19.8796	78.4006	1.71982	60.1704	39.4569	0.372737		22.7077	77.2923	47.0238	52.9762		61.3821	38.6179	44.6086	55.3914
	12.2943	86.7144	0.991258	22.7181	75.4564	1.82556		55.6904	43.7026	0.60698	13.9165	79.7217	6.36183		50.2216	49.7784	51.8349	48.1651		35.8385	64.1615	23.2283	76.7717
	35.6501	64.0189	0.330969	28.1396	71.518	0.342351		25.8005	71.9527	2.24683	14.6051	84.774	0.620964		37.3885	62.6115	55.2754	44.7246		39.4254	60.5746	47.0195	52.9805
	30.6303	68.8033	0.566316	29.0488	70.9512	0		32.1499	67.2584	0.591716	55.0847	44.9153	0		67.7019	32.2981	54.798	45.202		16.891	83.109	66.1738	33.8262
	26.3158	73.494	0.190235	33.3009	64.3866	2.31256		21.2182	77.7641	1.01773	27.451	72.549	0		24.6938	75.3062	46.572	53.428		38.3001	61.6999	48.9958	51.0042
	31.9447	66.6217	1.43363	26.4621	68.9793	4.55859		10.3069	89.5396	0.153453	32.9703	63.3663	3.66337		64.6109	35.3891	33.22	66.78		42.617	57.383	30.7103	69.2897
	36.0202	62.4517	1.52813	13.8538	85.1512	0.995025		17.5846	80.2514	2.16405	6.76759	87.9786	5.25378		29.608	70.392	30.4117	69.5883		72.0074	27.9926	24.4813	75.5187
	29.3757	68.8828	1.74151	43.5385	54.4956	1.96584		18.1995	81.313	0.487488	36.2522	63.2224	0.525394		34.2173	65.7827	25.9244	74.0756		25.821	74.179	47.499	52.501
	25.9669	70.1044	3.92879	39.3296	60.5587	0.111732		18.8853	79.0139	2.10075	35.7308	63.7811	0.488055		48.171	51.829	42.5437	57.4563		28.2845	71.7155	51.3802	48.6198
	26.0677	73.6695	0.262812	28.5421	70.2036	1.25437		19.2929	80.7071	0	15.6754	84.1734	0.15121		46.8756	53.1244	41.0857	58.9143		41.8868	58.1132	39.8669	60.1331
	25.8948	73.6646	0.440529	61.7089	38.2911	0		24.0714	75.7843	0.144248	33.9939	66.0061	0		34.4118	65.5882	27.3333	72.6667		31.8066	68.1934	25.2232	74.7768
	36.8012	62.3712	0.827563	33.7305	66.2695	0		34.7958	65.179	0.0252143	12.5691	87.3303	0.100553		39.3861	60.6139	20.2242	79.7758		51.567	48.433	35.8802	64.1198
	37.1868	61.5963	1.21689	31.8769	65.4667	2.65641		21.4603	75.6611	2.87854	46.5116	48.6977	4.7907		60.9591	39.0409	44.3357	55.6643		52.0955	47.9045	45.1079	54.8921
	37.5654	62.2143	0.220325	30.4878	69.1941	0.318134		32.3657	67.6343	0	18.9412	80.8074	0.251432		21.351	78.649	28.0702	71.9298		56.7341	43.2659	19.5202	80.4798
	28.8735	69.2274	1.89901	22.5767	76.0054	1.41792		30.4324	69.5676	0	21.4725	76.1299	2.39762		56.9347	43.0653	68.9076	31.0924		46.6396	53.3604	67.6046	32.3954
	24.8727	74.669	0.458248	28.6693	71.3307	0		31.6304	68.3696	0	24.5902	75.1756	0.234192		56.7957	43.2043	63.1461	36.8539		31.1529	68.8471	47.7663	52.2337
	21.4382	77.9291	0.63279	33.4264	65.4736	1.09998		25.366	74.2452	0.388838	30.7467	67.7131	1.54027		68.1908	31.8092	32.6598	67.3402		41.9019	58.0981	52.7806	47.2194
	35.7862	63.4263	0.787503	30.0934	69.8517	0.0549149		16.4842	81.3869	2.12895	46.2492	53.3273	0.423472		47.1969	52.8031	12.7103	87.2897		40.6053	59.3947	38.385	61.615
	25.07	72.7762	2.15378	19.5524	80.4476	0		29.4824	70.4051	0.112528	29.8054	69.9882	0.206368		60.2445	39.7555	28.9544	71.0456		34.0265	65.9735	42.3022	57.6978
	26.6489	72.1676	1.18351	23.1634	76.6267	0.209895		23.7046	74.9033	1.39211	45.1376	54.8624	0		40.7061	59.2939	47.0568	52.9432		26.8913	73.1087	13.9831	86.0169
	40.6158	59.3842	0	32.6617	67.2915	0.0468604		28.3787	70.7147	0.906599	15.9123	81.4289	2.65882		61.2732	38.7268	71.8294	28.1706		37.6216	62.3784	32.1297	67.8703
	41.7956	57.7726	0.43181	32.0394	67.8513	0.109349		42.2365	57.7635	0	28.5058	70.3992	1.09502		46.5031	53.4969	39.7535	60.2465		37.6366	62.3634	35.8486	64.1514
	15.2009	84.5557	0.243457	25.734	74.266	0		58.3333	41.6667	0	15.6117	84.1424	0.245955		69.391	30.609	9.13645	90.8636		69.5599	30.4401	35.1166	64.8834
	23.6255	75.2063	1.16821	22.5302	75.258	2.21174		61.0427	38.6334	0.323834	25.7682	73.9356	0.296187		38.631	61.369	50.932	49.068		24.4879	75.5121	56.8167	43.1833
	45.4837	54.5163	0	24.2828	74.8362	0.880958		54.3103	45.6897	0	24.3141	74.9854	0.700525		33.2182	66.7818	69.8736	30.1264		47.6082	52.3918	45.3629	54.6371
	19.8718	77.6603	2.46795	32.5103	67.4897	0		35.0156	63.17	1.81439	24.0433	71.8659	4.09079		33.4392	66.5608	22.5159	77.4841		39.5126	60.4874	35.1054	64.8946
	42.1911	57.8089	0	40.4429	58.9121	0.645023		27.8972	71.201	0.901849	18.6325	80.7123	0.655271		30.2189	69.7811	50	50		22.1529	77.8471	57.1402	42.8598
	35.7244	63.9175	0.358112	28.085	69.9378	1.9773		36.3651	63.6019	0.0329544	28.6145	69.9225	1.46299		49.1551	50.8449	9.00511	90.9949		48.3178	51.6822	40.3792	59.6208
	34.9731	64.6152	0.411695	14.2191	79.7203	6.06061		15.7258	80.6452	3.62903	10.907	88.3056	0.787402		43.1677	56.8323	24.6144	75.3856		39.1006	60.8994	30.5361	69.4639
	38.0449	61.5489	0.406174	33.7053	65.6712	0.623564		29.8518	69.1448	1.00342	22.7959	77.0056	0.19857		75.5062	24.4938	34.6091	65.3909		47.5388	52.4612	11.0683	88.9317
	48.5708	50.9272	0.501998	22.0557	68.5225	9.42184		37.3737	60.6409	1.98537	27.2477	70.5461	2.20629		43.9892	56.0108	48.0944	51.9056		37.8378	62.1622	30.0353	69.9647
	36.146	63.5479	0.306044	19.9451	78.9185	1.13636		27.9304	66.6806	5.38897	36.8047	63.1953	0		30.2481	69.7519	46.8283	53.1717		34.6924	65.3076	25.5736	74.4264
	38.4476	60.4676	1.08473	38.5962	60.8816	0.522193		22.4897	77.5103	0	22.2672	75.6338	2.09892		32.754	67.246	55.0625	44.9375		39.2157	60.7843	24.2028	75.7972
	34.1345	62.163	3.7025	32.5926	66.6667	0.740741		25.3989	74.5072	0.0938615	37.7551	61.7875	0.457424		51.1753	48.8247	33.258	66.742		32.0354	67.9646	43.9238	56.0762
	35.023	63.3515	1.62549	15.0633	82.7848	2.1519		16.8421	83.1579	0	21.554	76.593	1.85306		34.1024	65.8976	30.7843	69.2157		17.8395	82.1605	20.3118	79.6882
	50.0744	48.9289	0.996727	21.249	77.6893	1.06175		39.1668	58.5721	2.26111	22.5036	76.9899	0.506512		52.0922	47.9078	43.5939	56.4061		28.9714	71.0286	8.97785	91.0222
	37.2401	62.2187	0.541156	28.6486	70.7272	0.624262		24.4167	75.0399	0.543305	13.9009	81.1365	4.96251		38.4513	61.5487	44.816	55.184		26.4264	73.5736	61.8397	38.1603
	28.2498	71.4388	0.311402	30.3025	67.4858	2.21172		12.6956	87.1882	0.116279	32.2669	67.7331	0		27.0542	72.9458	51.6451	48.3549		21.0571	78.9429	47.1284	52.8716
	31.7991	67.7236	0.477327	29.5997	69.4248	0.975446		36.1156	61.1887	2.69568	17.5882	81.6717	0.740096		28.4325	71.5675	37.5265	62.4735		34.5867	65.4133	20.2381	79.7619
	36.6811	62.0237	1.29529	25.195	74.3001	0.504819		28.5964	70.5037	0.899933	31.7414	64.7059	3.55271		52.4797	47.5203	34.7403	65.2597		42.5813	57.4187	25.5282	74.4718
	50.8126	49.1614	0.0260044	59.8103	39.0686	1.12117		25.3002	74.2904	0.409389	45.6508	54.3492	0		37.7481	62.2519	38.7705	61.2295		41.5185	58.4815	28.5714	71.4286
	16.3121	83.6879	0	45.1766	54.8234	0		24.2518	74.6024	1.14589	27.8455	68.0894	4.06504		33.9463	66.0537	38.0074	61.9926		56.9597	43.0403	14.5488	85.4512
	57.9156	41.2631	0.821297	92.4051	7.59494	0		43.1232	55.4919	1.38491	28.3247	70.639	1.03627		46.4401	53.5599	67.3913	32.6087		53.95	46.05	60.1695	39.8305
	38.8792	58.5635	2.55722	35.0655	63.9476	0.986908		26.2073	68.5838	5.2089	31.8082	67.9726	0.219178				19.0408	80.9592		34.4965	65.5035	29.9092	70.0908
				39.1094	60.697	0.193611					56.4865	43.5135	0				35.9865	64.0135				59.5628	40.4372
				51.2239	47.9258	0.850296					48.0261	51.9739	0				34.4375	65.5625				36.4865	63.5135
				39.0834	59.9783	0.938289					34.0713	65.6827	0.246002				60.8197	39.1803				27.2887	72.7113
				41.7263	57.6029	0.670841					43.0457	56.5482	0.406091				40.5604	59.4396				25.7782	74.2218
				34.9859	63.7363	1.27779					19.8828	79.807	0.310131				32.3027	67.6973				49.4589	50.5411
				15.9443	82.1945	1.86125					22.2222	77.7778	0				26.7857	73.2143				37.6014	62.3986
				24.2515	75.3938	0.354761					14.4847	85.1045	0.410788				24.5866	75.4134				50.4558	49.5442
				33.9564	60.1691	5.8745					10.3638	85.6007	4.03546				49.1838	50.8162				36.8847	63.1153
				49.7817	49.6179	0.600437					29.0164	69.2447	1.7389				45.2759	54.7241				39.3151	60.6849
				31.8649	68.0823	0.0527565					16.4578	83.1897	0.352457				38.2448	61.7552				34.6133	65.3867
				37.1262	60.1165	2.75728					20.0227	79.8637	0.11355				24.1793	75.8207				30.8219	69.1781
Mean	33.86	65.15	0.9861	33.54	65.21	1.246	Mean	30.19	68.71	1.1	28.2	70.6	1.2	Mean	44.94	55.06	39.66	60.34	Mean	39.69	60.31	36.81	63.19
