# Supplementary material for: Suppressed prefrontal neuronal firing variability and impaired social representation in IRSp53-mutant mice
Source: eLife. 2022 Nov 1;11:e74998. doi: 10.7554/eLife.74998 (PMC9662818; doi:10.7554/eLife.74998)
Supplement: Figure 1—source data 1. — The excel file contains the numerical data used to generate Figure 1D–J. [file elife-74998-fig1-data1.xlsx]

## Sheet: Fig 1
	Figure 1D					Figure 1E					Figure 1F
	WT		KO			WT		KO			WT		KO
	Left	Right	Left	Right		Social	Object	Social	Object		Social	Object	Social	Object
	82.5011	233.028	144.188	131.535		233.645	131.905	200.082	130.135		104.545	280.1	135.656	126.611
	176.812	156.151	83.3446	69.1892		200.971	144.29	114.58	71.4053		127.188	149.353	79.0418	39.4876
	115.092	186.666	219.737	138.2		180.439	115.268	211.351	195.537		136.138	127.866	234.862	156.05
	172.432	148.766	83.7008	67.8124		223.852	95.638	132.59	94.269		112.993	134.258	85.7028	135.881
	129.813	221.103	166.102	159.987		214.478	122.907	97.9143	128.757		156.583	108.524	155.409	111.128
	148.547	148.354	124.129	159.437		198.322	134.843	101.884	64.7349		159.706	127.51	93.9074	65.3094
			181.855	109.603				163.398	200.29				180.56	91.0232
			68.1948	59.1456				124.139	53.1065				111.33	72.4688
	Figure 1G
	WT
	0	0.5	1	1.5	2	2.5	3	3.5	4	4.5	5	5.5	6	6.5	7	7.5	8	8.5	9	9.5	10	10.5	11	11.5	12	12.5	13	13.5	14	14.5	15	15.5	16	16.5	17	17.5	18	18.5	19	19.5	20	20.5	21	21.5	22	22.5	23	23.5	24
	21.7885	26.9603	23.5235	14.7814	8.97564	9.37604	12.5125	17.8512	20.4204	24.658	20.9877	22.0554	23.9907	20.3537	20.6874	17.1171	15.7157	13.013	16.6166	12.8462	8.47514	8.60861	6.63997	4.6046	3.23657	3.16984	2.83617	2.13547	1.26793	1.16783	2.46914	2.86954	2.86954	1.66834	1.36803	1.16783	0.867534	0.867534	1.36803	1.06773	0.633967	1.73507	1.56823	1.33467	1.86854	1.23457	0.367034	0.4004	0.600601
	18.2516	28.2282	15.4821	10.0434	7.14047	9.10911	8.30831	10.3437	13.7137	14.9816	19.1191	25.5923	27.3607	21.7217	27.5275	14.014	12.8462	10.2102	9.60961	7.90791	8.04137	6.20621	5.93927	7.54087	5.53887	5.23857	4.07074	2.86954	2.1021	1.53487	0.967634	1.13447	1.001	0.767434	0.867534	1.1011	0.800801	0.367034	0.633967	0.700701	0.767434	0.633967	0.667334	0.533867	0.633967	0.800801	0.867534	1.43477	1.96864
	13.0464	18.6854	17.4174	15.6823	11.3447	8.80881	10.3437	15.5822	43.5435	55.7891	48.5152	40.5739	30.8308	25.5255	21.1879	19.7197	16.9837	16.2496	11.8118	8.30831	7.47414	6.23957	6.20621	6.20621	4.63797	3.23657	2.83617	2.1021	1.66834	1.2012	1.16783	1.66834	0.867534	2.13547	1.5015	1.43477	1.53487	1.16783	1.1011	1.2012	1.3013	1.4014	1.3013	0.967634	0.600601	0.834168	0.934268	0.567234	0.734067
	8.17484	5.50551	3.67034	1.96864	0.734067	0.667334	0.700701	0.934268	1.8018	3.03637	4.53787	2.76944	2.73607	1.46813	1.33467	1.26793	1.9019	1.43477	1.06773	0.934268	1.16783	0.934268	0.633967	0.467134	0.900901	0.500501	0.767434	1.06773	1.56823	1.26793	0.867534	1.6016	1.66834	1.66834	2.06874	1.16783	1.1011	1.06773	2.73607	2.16884	3.87054	2.13547	0.867534	0.767434	1.36803	4.83817	3.53687	2.16884	1.56823
	9.70971	16.6166	14.5145	10.644	8.10811	5.27194	13.1131	37.671	85.4855	78.345	56.2563	37.2039	30.8308	24.1909	18.2182	13.6136	16.9503	9.74308	7.10711	3.73707	2.7027	1.83517	1.43477	1.63497	0.934268	1.83517	1.53487	0.967634	0.800801	0.533867	0.800801	0.967634	1.16783	0.734067	0.834168	0.433767	0.467134	0.467134	0.500501	1.16783	0.667334	0.367034	0.734067	0.533867	1.001	0.433767	0.567234	0.900901	0.667334
	4.3043	7.10711	4.37104	5.37204	4.004	3.003	2.53587	4.77144	10.0767	9.77644	8.20821	9.00901	8.07474	5.10511	3.77044	4.004	4.1041	4.87154	8.44178	8.94228	11.4781	10.5772	7.87454	9.64298	13.2466	14.5479	22.5559	37.2039	52.7194	36.8368	19.8198	13.7804	10.3437	10.0767	10.0434	4.9049	3.47014	4.5045	2.7027	2.43577	2.63597	2.16884	2.002	1.6016	1.13447	0.967634	1.6016	1.76844	1.76844
	34.8015	34.2009	27.2272	16.8836	11.4114	10.1101	11.2446	29.296	56.0227	48.4484	27.8278	23.9239	24.2576	20.1869	21.7551	21.3213	18.8522	16.1161	5.77244	4.27094	3.57024	4.73807	4.47114	6.17284	7.04037	7.40741	12.9463	8.54188	4.6046	1.4014	2.6026	1.13447	1.23457	1.03437	0.633967	0.500501	0.734067	0.633967	0.600601	0.934268	0.500501	0.667334	0.967634	1.13447	0.800801	1.3013	0.567234	0.767434	1.76844
	2.73607	1.3013	4.07074	3.06974	2.66934	2.1021	2.53587	2.9029	5.23857	8.17484	6.87354	4.1041	3.93727	4.8048	4.33767	4.1041	3.26994	3.23657	3.2032	3.4034	3.73707	3.16984	4.2042	2.2022	2.43577	2.83617	2.23557	3.13647	2.63597	2.03537	1.8018	2.03537	1.9019	2.1021	3.26994	2.36904	2.53587	2.53587	2.6026	4.1041	2.46914	2.1021	1.6016	1.23457	1.53487	1.5015	0.934268	1.33467	1.4014
	10.9776	15.649	16.4831	10.7441	9.34268	7.87454	6.40641	11.6116	16.4164	26.6934	27.8946	21.9553	20.02	21.6884	15.015	10.2436	10.1768	11.8785	7.90791	11.2112	10.0434	9.70971	12.2789	12.3123	6.63997	7.00701	6.27294	6.94027	4.53787	4.5045	3.2032	6.23957	4.97164	1.73507	1.56823	1.86854	2.1021	0.934268	0.800801	0.734067	1.36803	1.06773	1.2012	0.700701	0.834168	0.567234	0.700701	0.934268	2.26894
	17.2172	20.6874	16.7501	9.54288	7.37404	6.37304	6.94027	8.74208	15.015	16.65	20.3871	12.9129	16.1161	11.9119	12.012	7.80781	6.33967	5.50551	4.8048	5.67234	6.60661	5.87254	7.54087	6.13947	5.50551	6.20621	5.90591	7.74107	7.30731	6.67334	8.47514	12.012	12.0787	8.47514	8.20821	6.70671	7.50751	6.70671	4.07074	3.93727	4.87154	4.23757	4.73807	4.27094	7.47414	4.87154	3.63697	6.17284	4.87154
	17.5843	23.8906	24.9249	14.6146	8.47514	7.97464	8.37504	13.1465	27.294	38.7721	33.3667	25.0584	24.7581	21.5549	18.1849	19.9533	20.4538	17.1171	15.5489	10.4104	6.13947	5.90591	4.77144	3.63697	3.13647	2.6026	3.43677	2.86954	3.8038	3.2032	2.5025	1.66834	1.6016	1.4014	1.93527	1.76844	1.3013	1.26793	1.83517	1.36803	1.5015	1.46813	2.16884	2.06874	1.23457	0.867534	1.1011	1.23457	1.26793
	5.40541	2.63597	2.76944	2.4024	0.900901	1.13447	1.66834	2.06874	4.97164	3.8038	4.3043	4.37104	6.20621	7.27394	7.10711	7.30731	3.3033	5.03837	5.77244	5.53887	5.20521	7.17384	14.2142	8.27494	7.97464	6.37304	4.27094	2.002	1.1011	1.7017	0.734067	1.1011	1.001	0.633967	0.567234	0.567234	0.834168	0.834168	0.800801	0.533867	0.533867	0.4004	0.467134	0.734067	0.600601	0.667334	0.633967	0.500501	0.433767
	11.4448	11.3447	11.5115	9.40941	9.24258	5.37204	8.34168	14.9816	24.4244	26.8602	24.6246	24.9583	26.5933	21.4214	21.3213	20.0534	23.7571	24.7915	26.4264	25.025	24.3911	16.7501	13.5802	8.14147	6.27294	5.80581	4.67134	1.83517	2.5025	2.83617	3.53687	1.6016	0.934268	1.03437	1.16783	0.467134	0.433767	0.967634	0.967634	0.533867	0.433767	0.767434	0.533867	0.934268	0.600601	0.3003	0.500501	0.500501	0.266934
	10.7774	16.3497	14.9816	10.5772	10.0767	10.4771	11.2446	13.5135	21.288	28.4284	29.8966	21.655	21.7551	16.4831	14.8482	14.4478	9.94328	9.04238	4.17084	3.3033	2.7027	2.76944	2.53587	2.33567	2.53587	2.86954	2.66934	3.2032	3.63697	2.53587	1.6016	2.4024	2.1021	2.23557	3.06974	2.2022	1.96864	1.33467	1.13447	1.2012	1.56823	1.7017	1.8018	1.56823	1.8018	2.06874	1.6016	1.33467	1.001
	19.3193	22.4224	13.1465	9.87654	7.94127	6.53987	6.47314	9.47614	16.5165	16.8502	14.2142	14.2476	12.0454	12.2122	9.37604	7.20721	9.37604	7.40741	4.33767	5.07174	4.5045	4.97164	3.9039	3.03637	2.83617	2.46914	2.66934	2.3023	3.003	2.63597	2.83617	1.6016	1.53487	2.8028	1.56823	1.93527	2.66934	2.56924	2.5025	1.8018	2.43577	2.6026	1.5015	1.5015	1.9019	1.6016	2.43577	2.43577	2.3023
	6.67334	10.5105	7.77444	5.47214	4.23757	4.03737	2.9029	4.53787	9.37604	10.01	7.87454	4.93827	4.004	7.60761	5.77244	7.24057	6.53987	3.83717	3.33667	3.47014	5.43877	4.93827	3.97064	3.003	3.33667	2.5025	3.37004	4.2042	3.26994	1.56823	1.53487	1.56823	1.93527	2.1021	1.56823	1.3013	1.13447	1.83517	1.43477	1.53487	1.7017	1.76844	1.53487	1.8018	1.36803	1.1011	0.867534	0.767434	1.4014
	10.2769	8.37504	10.2769	8.90891	7.67434	7.27394	5.40541	5.83917	12.1788	13.4801	7.14047	7.00701	9.54288	13.8805	9.30931	7.07374	8.14147	8.30831	7.04037	4.13747	3.16984	2.06874	2.13547	2.2022	1.96864	2.03537	1.66834	1.33467	0.934268	1.63497	1.46813	1.23457	1.36803	1.6016	1.06773	1.001	1.4014	1.4014	1.2012	1.1011	0.934268	1.06773	1.03437	1.33467	1.2012	0.934268	1.001	1.53487	0.967634
	7.97464	11.2446	11.6783	7.34067	6.40641	4.23757	6.40641	7.50751	10.7441	12.012	12.5792	11.4781	13.5469	13.4468	11.9786	12.7794	11.7117	9.70971	12.4791	13.7804	16.2829	17.4842	10.6773	11.0444	9.47614	9.84318	11.1778	7.60761	7.57424	6.80681	5.47214	4.07074	3.33667	5.07174	4.23757	2.2022	2.06874	2.46914	2.73607	2.33567	2.4024	2.53587	2.7027	1.5015	1.43477	1.46813	1.16783	0.834168	1.3013
	8.24157	11.3447	6.30631	2.73607	3.97064	3.57024	4.33767	7.20721	12.0454	12.2456	9.77644	11.4448	16.2162	10.8775	12.9796	13.013	16.3497	20.1201	31.0644	30.6306	19.7865	14.014	14.2809	7.54087	4.9049	4.2042	3.97064	2.2022	1.66834	1.43477	2.33567	2.36904	1.83517	1.7017	0.934268	1.2012	1.53487	1.001	0.967634	1.2012	0.600601	0.734067	1.26793	1.3013	1.66834	1.06773	0.967634	2.002	1.2012
	5.60561	7.57424	9.14248	7.87454	7.10711	10.9109	7.74107	8.04137	11.4448	13.1131	12.6126	15.1818	15.4821	17.9513	14.5812	10.7107	4.87154	6.13947	5.20521	3.23657	3.06974	3.1031	3.97064	5.73907	3.43677	2.56924	1.63497	3.03637	1.43477	1.6016	1.16783	1.43477	1.2012	1.56823	1.73507	1.73507	1.43477	1.73507	1.53487	1.26793	1.53487	1.8018	3.03637	3.03637	2.6026	2.002	1.96864	1.4014	1.53487
	18.4852	29.296	19.0524	17.017	8.64198	4.23757	6.77344	19.0524	26.9269	30.2302	22.022	21.5215	23.0564	15.4154	19.3527	16.9837	9.97664	14.3477	17.0504	11.1445	13.38	8.30831	8.97564	11.5782	8.00801	7.40741	4.17084	6.47314	6.84017	3.16984	2.4024	1.53487	1.1011	3.003	3.3033	3.47014	2.46914	4.03737	2.56924	2.46914	2.4024	1.36803	1.63497	1.53487	2.33567	1.26793	1.1011	1.06773	1.16783
	10.2436	12.2456	7.74107	4.43777	4.17084	4.37104	3.57024	5.07174	12.2456	13.4801	16.1161	13.2466	16.7167	13.6803	10.7107	9.47614	10.2769	10.01	6.13947	5.33867	6.90691	2.66934	2.66934	2.9029	2.06874	1.9019	1.1011	0.900901	1.96864	2.26894	1.7017	3.47014	3.003	1.63497	1.7017	0.934268	1.33467	1.23457	2.36904	2.16884	2.43577	4.37104	5.13847	5.97264	4.13747	3.47014	4.87154	4.67134	2.66934
	12.3123	17.3507	14.2142	14.1475	8.84218	7.04037	8.64198	13.9139	24.7915	42.2089	45.7457	46.9469	35.2352	26.4932	13.3133	15.9493	12.0454	10.5772	9.87654	11.7117	13.1465	10.5105	6.80681	7.17384	5.80581	5.03837	5.47214	3.1031	2.46914	2.53587	2.9029	3.7037	4.77144	1.6016	1.8018	1.86854	3.8038	2.56924	3.53687	2.06874	1.83517	1.63497	1.63497	1.6016	1.7017	2.26894	2.06874	1.46813	0.900901
	10.9443	24.024	18.0514	12.2456	8.67534	5.73907	7.34067	11.0777	15.0484	17.0838	14.5145	13.6136	13.2799	11.011	9.90991	9.77644	8.67534	6.67334	4.43777	4.3043	6.53987	3.93727	4.4044	4.6046	2.53587	3.2032	2.73607	3.26994	2.56924	2.73607	2.2022	3.4034	3.23657	2.53587	2.7027	1.7017	1.5015	1.26793	1.4014	1.73507	1.56823	2.2022	2.002	1.5015	1.5015	2.06874	2.7027	2.93627	2.33567
	16.8502	24.6914	17.4508	8.74208	9.77644	7.94127	7.94127	9.90991	12.1121	17.0838	17.017	13.5469	9.64298	13.2466	11.1778	7.37404	7.67434	7.74107	6.10611	4.63797	5.80581	5.97264	7.30731	4.8048	3.87054	3.73707	4.7047	6.33967	5.53887	4.6046	5.43877	6.84017	7.04037	6.77344	5.33867	3.63697	4.5045	3.5035	3.3033	2.56924	2.6026	2.46914	2.7027	2.8028	3.37004	2.23557	2.53587	3.57024	2.6026
	3.2032	7.07374	8.97564	8.47514	5.60561	5.70571	5.23857	7.50751	14.2476	23.4568	27.0938	28.1281	34.5345	38.4051	30.5639	25.0918	18.8188	19.7197	18.2516	12.0454	15.649	11.4781	7.67434	4.23757	3.57024	2.9029	1.86854	2.2022	1.3013	0.867534	0.900901	0.767434	0.867534	1.16783	1.03437	0.734067	0.934268	1.36803	0.867534	0.600601	0.700701	0.767434	0.467134	0.834168	0.467134	0.600601	0.467134	0.700701	0.600601
	15.9159	19.4862	25.4922	20.2202	15.382	13.1131	12.646	26.6934	38.1048	43.5769	52.686	50.0501	42.5425	43.4434	43.4768	24.291	21.7885	13.4468	8.04137	7.14047	5.73907	3.47014	2.8028	2.13547	1.96864	1.7017	1.2012	1.06773	0.767434	0.500501	0.333667	0.1001	0.166834	0.2002	0.166834	0.233567	0.333667	0.934268	0.2002	0.967634	0.266934	1.1011	0.3003	0.1001	0.3003	0.0667334	0.266934	0.3003	0.166834
	12.5792	19.7531	16.6166	10.7774	6.47314	6.43977	6.33967	12.2789	17.7177	18.7855	26.5599	21.9887	28.7955	17.1171	11.6783	14.4478	14.4478	10.8775	11.7784	8.20821	7.14047	4.9049	6.40641	6.13947	7.60761	7.24057	9.14248	6.94027	4.3043	4.13747	3.9039	5.13847	3.4034	3.87054	5.20521	4.37104	5.97264	5.03837	6.20621	6.00601	5.53887	4.63797	3.47014	2.6026	2.3023	1.2012	0.934268	1.66834	1.96864
	19.4862	16.2829	10.8108	8.44178	7.04037	6.74007	9.14248	16.1828	22.8562	21.9887	38.4384	33.7337	24.1909	19.8532	26.293	22.1555	19.3527	17.017	16.0494	19.3861	18.4184	15.1485	9.57624	9.57624	9.77644	6.67334	4.47114	1.26793	1.93527	1.4014	0.934268	1.36803	0.734067	0.433767	0.600601	0.500501	1.23457	1.5015	2.53587	1.5015	1.06773	0.600601	0.800801	2.002	1.001	0.800801	0.867534	0.967634	0.4004
	16.5832	21.5549	13.38	8.34168	6.57324	5.07174	4.33767	7.70771	19.3527	24.3577	19.0858	13.9473	10.3437	8.80881	4.77144	6.53987	5.90591	3.43677	3.33667	3.003	2.36904	2.03537	2.4024	1.73507	1.63497	1.13447	1.001	1.5015	1.06773	1.3013	1.83517	1.1011	1.43477	2.002	1.16783	1.03437	1.33467	1.16783	1.03437	1.33467	1.66834	1.5015	1.36803	1.1011	1.13447	0.834168	1.3013	1.36803	1.26793
	30.0968	26.4932	23.9573	15.0484	14.2476	11.7451	10.3437	13.5802	20.5539	31.5983	27.0938	23.6904	24.1575	17.6844	13.4801	18.285	13.5135	9.40941	9.57624	6.53987	7.07374	5.50551	7.50751	4.67134	4.63797	5.27194	4.13747	3.003	1.66834	2.4024	2.1021	4.03737	3.77044	2.8028	2.13547	1.63497	1.53487	2.002	3.1031	1.86854	1.83517	1.2012	1.76844	0.867534	0.900901	1.3013	2.56924	2.83617	1.23457
	22.5559	44.8448	41.9753	36.3697	21.4882	21.288	23.9907	38.7721	42.7761	41.3413	43.8438	30.6306	28.8956	26.5265	21.8552	16.5165	11.8785	10.5439	6.80681	6.70671	4.67134	4.93827	4.004	2.06874	2.13547	0.867534	0.166834	0.367034	0.333667	0.2002	0.133467	0.2002	0.133467	0.233567	0.233567	0.133467	0.2002	0.0667334	0.433767	0.467134	0.166834	0.2002	0.233567	0.834168	0.800801	0.734067	0.467134	0.500501	0.1001
	27.5943	29.8966	16.65	11.4448	8.17484	7.87454	9.10911	14.8482	23.4902	22.4892	28.8622	25.5923	30.4304	23.5235	26.0594	22.5893	31.3313	24.3577	16.5165	10.8775	12.1788	9.77644	8.80881	7.67434	6.10611	4.63797	4.57124	2.63597	2.46914	1.03437	0.900901	1.63497	2.16884	0.934268	0.633967	0.567234	0.567234	0.433767	0.867534	0.4004	1.13447	1.66834	1.43477	0.867534	0.967634	3.03637	1.33467	1.36803	1.001
	32.5325	49.4494	31.7317	23.8572	20.6206	13.1131	11.6116	17.6176	22.3557	25.2252	25.292	22.8228	21.7217	18.3517	10.9109	12.7461	16.4164	11.8785	14.2476	10.7441	11.011	8.70871	9.07574	8.17484	9.57624	8.17484	6.47314	5.07174	2.63597	1.96864	1.56823	2.13547	2.86954	3.003	1.26793	0.967634	0.967634	1.26793	1.4014	0.600601	0.667334	1.16783	0.734067	1.16783	0.800801	1.03437	0.900901	0.767434	0.500501
	22.022	35.1351	23.4902	18.5185	11.1778	11.378	11.5782	16.1828	23.9573	28.1281	24.2242	20.9209	17.0504	23.6236	18.1181	23.4902	17.6176	14.1475	13.9806	12.0454	11.8118	10.8442	10.9776	9.30931	6.87354	4.23757	2.56924	1.43477	1.56823	1.83517	2.53587	2.3023	1.16783	0.867534	1.1011	1.001	1.33467	1.2012	1.53487	1.1011	0.500501	0.734067	1.1011	0.633967	0.633967	0.934268	0.800801	0.967634	0.600601
	25.3253	28.7621	22.8562	19.4528	10.0434	9.07574	10.8775	13.013	24.658	27.4942	20.2536	23.9573	23.29	31.9653	22.5225	22.2222	22.8562	27.3941	24.658	23.3567	20.8542	14.1808	13.013	6.37304	3.73707	3.47014	5.57224	5.13847	4.73807	4.13747	2.86954	2.1021	1.73507	1.26793	1.1011	0.667334	0.700701	0.767434	1.03437	0.867534	0.800801	0.367034	0.900901	0.700701	0.767434	0.633967	1.001	1.36803	0.567234
	7.44077	12.8128	7.07374	3.1031	4.63797	2.76944	3.03637	5.83917	8.20821	6.63997	7.10711	8.57524	7.84117	7.17384	7.54087	6.27294	5.53887	5.47214	3.03637	3.5035	3.06974	4.03737	2.36904	2.66934	2.46914	1.86854	1.93527	1.001	1.06773	0.867534	0.667334	1.1011	1.46813	2.13547	1.73507	1.8018	1.3013	1.4014	0.967634	2.06874	3.4034	3.43677	3.9039	3.47014	2.96964	3.6036	3.1031	3.7037	2.7027
	28.5619	28.7621	20.7541	19.5195	11.6783	7.84117	8.37504	15.9493	28.1281	31.2312	26.0594	20.2202	14.3477	15.5489	17.4842	14.7814	13.8805	16.4164	23.4568	16.4164	16.1495	15.4821	12.3457	11.378	7.67434	6.27294	4.4044	2.5025	3.53687	2.76944	2.63597	1.63497	1.001	1.23457	1.4014	1.9019	1.46813	2.23557	1.06773	0.667334	0.734067	0.934268	1.63497	1.43477	1.4014	0.967634	0.934268	0.934268	0.567234
	32.299	34.034	23.8238	14.3477	7.80781	6.03937	7.17384	7.84117	15.2819	16.7835	16.7835	14.8815	14.3143	12.6793	12.9463	13.647	15.0817	12.8462	6.97364	8.07474	8.07474	4.83817	4.83817	4.004	4.27094	3.83717	3.53687	2.63597	3.2032	2.66934	3.33667	3.2032	1.83517	1.9019	1.16783	1.4014	1.1011	1.53487	1.23457	0.934268	1.23457	0.834168	0.600601	0.734067	0.867534	0.600601	0.633967	0.834168	0.633967
	16.0827	21.0878	18.3517	17.7177	14.014	9.10911	10.6773	13.6136	27.9279	23.4902	22.8896	22.9229	12.6126	14.3477	12.5792	9.17584	7.67434	5.27194	5.03837	5.43877	5.37204	7.20721	10.4104	11.2446	9.17584	9.74308	5.97264	7.70771	7.80781	6.87354	5.43877	5.10511	1.8018	0.767434	1.9019	0.934268	0.967634	1.001	1.53487	2.03537	2.002	1.76844	2.2022	1.46813	1.66834	1.4014	1.2012	2.13547	1.43477
	16.6834	24.7247	25.0918	27.1605	24.3911	17.4842	25.8258	39.5395	51.4848	50.5172	35.2352	23.7237	20.5873	19.9533	20.5539	12.646	10.6773	7.77444	8.27494	8.67534	10.7441	9.20921	16.1828	9.04238	7.60761	7.90791	6.23957	4.3043	1.73507	1.8018	1.86854	1.73507	0.633967	0.767434	0.166834	0.2002	0.600601	0.367034	0.700701	0.4004	0.433767	0.567234	0.700701	0.467134	0.333667	0.500501	0.467134	0.333667	0.266934
	18.7855	24.0908	21.7885	15.2152	13.4801	12.4791	12.7461	17.6176	24.0908	29.1625	29.8298	22.7895	25.7591	24.8916	19.4194	18.2516	14.6813	16.5499	11.2112	9.47614	7.60761	6.70671	5.23857	4.57124	3.5035	2.63597	2.23557	2.4024	3.2032	1.73507	1.86854	1.26793	1.5015	2.3023	2.23557	1.93527	1.53487	1.1011	1.001	1.43477	1.8018	2.03537	2.26894	3.43677	2.76944	1.001	2.002	1.36803	1.16783
	17.4842	22.7561	12.4124	8.00801	4.53787	3.93727	4.004	7.24057	8.40841	10.7774	10.5105	8.54188	13.4134	14.4144	12.379	13.1798	13.9139	11.378	10.7441	12.4124	11.378	11.6116	15.2152	13.0797	5.83917	3.73707	3.06974	3.43677	3.03637	2.03537	1.86854	2.93627	1.86854	1.86854	1.26793	1.4014	3.03637	1.001	1.43477	1.2012	0.800801	0.967634	0.967634	1.2012	0.667334	0.633967	0.800801	1.63497	0.834168
	25.4588	33.9339	31.3981	24.3911	15.2152	9.20921	7.84117	13.8472	17.9513	17.284	17.3507	15.3153	13.7137	13.4134	11.2112	8.77544	7.17384	8.17484	9.27594	8.40841	5.53887	5.37204	4.73807	6.17284	5.33867	4.17084	5.03837	6.20621	2.46914	1.53487	2.6026	1.46813	0.967634	1.73507	1.63497	0.867534	1.56823	1.9019	1.93527	1.06773	1.73507	1.76844	1.06773	1.46813	1.76844	0.800801	0.667334	0.567234	0.967634
	0	0.3003	0.3003	0.0667334	0.1001	0.800801	0.233567	0.567234	0.633967	0.867534	1.23457	1.4014	0.834168	1.43477	1.43477	2.1021	1.8018	1.16783	2.1021	2.3023	1.93527	1.26793	0.934268	3.4034	3.6036	2.23557	2.3023	2.46914	1.8018	3.73707	3.03637	2.96964	2.56924	1.33467	2.002	2.36904	1.9019	2.4024	2.86954	1.5015	1.7017	1.43477	1.16783	1.46813	1.36803	1.03437	0.967634	0.967634	1.03437
	31.298	20.287	8.04137	4.27094	4.33767	4.93827	5.10511	5.30531	4.6046	4.3043	5.03837	5.33867	6.57324	5.07174	4.43777	4.03737	2.83617	2.56924	3.37004	2.76944	3.003	3.23657	4.1041	2.8028	2.06874	1.86854	1.73507	1.63497	2.13547	1.6016	1.5015	0.867534	1.06773	1.53487	2.33567	1.1011	0.934268	0.800801	0.767434	0.867534	1.2012	1.03437	1.33467	1.2012	1.26793	0.934268	1.4014	2.26894	1.93527
	34.9683	19.2192	13.3133	8.90891	5.77244	12.2789	16.8502	15.4488	18.018	10.6106	15.015	13.38	15.0817	14.6813	14.381	17.4508	17.5175	18.6854	16.2496	23.8238	22.2222	28.6954	29.6296	18.7855	13.7137	11.6783	10.8775	10.7774	3.87054	3.63697	2.16884	0.934268	0.600601	1.03437	0.700701	0.533867	0.533867	0.533867	0.4004	0.4004	0.500501	1.2012	1.26793	1.26793	0.834168	0.834168	0.633967	0.567234	0.4004
Mean	16.39	20.19	15.97	11.88	8.724	7.489	8.274	13.03	20.94	23.24	21.98	19.19	18.45	16.86	14.89	13.22	12.23	11.1	10.18	9.156	8.761	7.598	7.44	6.217	5.131	4.613	4.43	4.236	3.919	3.138	2.66	2.671	2.295	2.117	2.006	1.573	1.693	1.645	1.671	1.503	1.563	1.56	1.585	1.524	1.504	1.367	1.34	1.507	1.262
SEM	1.334	1.563	1.247	1.057	0.7368	0.6033	0.7384	1.313	2.23	2.237	1.916	1.601	1.391	1.263	1.191	0.9221	0.9483	0.9065	0.9914	0.9487	0.8492	0.7753	0.7676	0.5492	0.4398	0.4319	0.5585	0.7984	1.094	0.7669	0.435	0.3835	0.3377	0.2821	0.2774	0.186	0.206	0.1892	0.168	0.1549	0.1671	0.1487	0.1562	0.1565	0.1754	0.1541	0.1436	0.1701	0.1284
1Q	9.71	11.34	9.142	7.875	5.606	4.371	5.105	7.241	12.05	12.25	12.58	11.48	12.05	11.91	9.91	7.374	7.174	6.139	5.038	4.271	4.505	3.937	3.971	3.003	2.536	2.503	2.236	1.835	1.568	1.401	1.168	1.235	1.001	1.034	1.034	0.7341	0.8675	0.9343	0.8675	0.8675	0.6673	0.7674	0.8675	0.8342	0.8008	0.8008	0.6673	0.7674	0.6006
Median	16.58	20.29	15.48	10.58	8.108	7.04	7.841	12.28	17.95	21.99	20.39	20.92	16.72	15.55	13.31	13.18	11.88	10.21	8.275	8.075	7.074	5.973	6.406	6.139	4.638	3.737	3.537	2.87	2.469	1.969	2.102	1.668	1.602	1.668	1.568	1.201	1.335	1.268	1.368	1.201	1.368	1.401	1.335	1.301	1.235	1.001	0.9676	1.335	1.168
3Q	22.02	26.96	22.86	15.68	11.18	9.376	10.88	15.95	24.66	29.16	27.89	23.96	24.76	21.69	20.55	18.25	16.95	16.12	14.25	11.71	11.81	10.51	10.41	8.275	7.04	6.373	5.472	5.138	3.804	3.17	2.87	3.203	2.87	2.236	2.135	1.902	1.969	2.002	2.536	2.035	2.002	2.035	2.002	1.602	1.768	1.502	1.602	1.768	1.768
	Figure 1H
	WT
	0	0.5	1	1.5	2	2.5	3	3.5	4	4.5	5	5.5	6	6.5	7	7.5	8	8.5	9	9.5	10	10.5	11	11.5	12	12.5	13	13.5	14	14.5	15	15.5	16	16.5	17	17.5	18	18.5	19	19.5	20	20.5	21	21.5	22	22.5	23	23.5	24
	3.47014	4.93827	2.23557	2.1021	0.600601	0.900901	1.4014	1.5015	1.3013	2.56924	2.43577	3.63697	3.93727	2.33567	1.76844	0.600601	1.23457	0.834168	0.734067	0.867534	0.967634	1.001	0.934268	0.967634	0.3003	0.2002	0.433767	0.2002	0.2002	0.2002	0.133467	0.166834	0.3003	0.166834	0.2002	0.166834	0.166834	0.2002	0.1001	0.2002	0.233567	0.1001	0.233567	0.2002	0.166834	0.233567	0.3003	0.533867	0.333667
	5.63897	8.77544	2.7027	1.86854	2.53587	2.1021	1.9019	1.96864	6.53987	3.03637	4.77144	3.26994	3.67034	3.06974	3.63697	2.2022	1.8018	2.2022	2.33567	1.7017	1.23457	1.6016	1.76844	1.5015	1.83517	1.23457	1.06773	1.16783	1.63497	1.3013	2.03537	3.8038	3.9039	2.23557	4.43777	3.6036	2.76944	2.63597	2.23557	3.3033	2.46914	1.53487	2.1021	3.67034	2.4024	2.16884	1.4014	1.2012	1.36803
	1.03437	0.967634	0.4004	0.0333667	0.266934	0.0333667	0.0667334	0.233567	0.333667	0.700701	0.967634	0.567234	0.633967	0.967634	0.633967	0.700701	0.934268	0.433767	1.1011	0.767434	0.834168	1.4014	1.56823	1.36803	1.03437	1.2012	0.900901	2.6026	1.06773	0.600601	0.767434	0.600601	0.900901	1.56823	1.13447	1.3013	1.93527	2.3023	3.83717	3.87054	3.23657	2.53587	1.63497	1.43477	1.36803	1.06773	1.23457	0.934268	1.1011
	28.8956	20.02	13.6803	14.1475	8.10811	6.67334	12.6793	35.1018	83.617	82.6159	38.3717	19.8532	16.5499	18.4852	15.382	19.4862	24.4912	13.4801	9.24258	3.97064	4.17084	2.46914	2.66934	2.2022	1.63497	1.3013	1.56823	1.23457	0.667334	0.934268	1.06773	1.6016	1.2012	0.767434	0.934268	1.26793	2.03537	1.53487	1.66834	0.800801	1.03437	1.13447	3.23657	2.46914	3.4034	1.6016	1.26793	2.26894	1.36803
	5.87254	13.9473	2.46914	0.934268	1.26793	1.1011	1.53487	1.5015	3.03637	4.33767	2.7027	3.3033	5.37204	3.1031	3.5035	4.27094	5.07174	5.60561	4.37104	3.87054	2.56924	3.13647	2.1021	2.96964	3.9039	2.96964	2.26894	3.8038	2.2022	1.86854	1.73507	1.6016	0.967634	1.16783	0.767434	1.7017	1.13447	0.934268	0.800801	1.36803	1.1011	1.001	0.600601	0.633967	0.767434	1.13447	1.26793	0.900901	0.734067
	14.648	20.5205	16.9503	14.0474	13.1465	8.07474	11.9119	27.1939	40.4071	41.0744	34.8015	28.4618	37.8712	34.6346	26.66	18.9523	10.01	6.57324	5.37204	7.67434	7.54087	10.8108	6.20621	4.5045	3.26994	3.2032	2.6026	1.73507	1.16783	0.333667	0.667334	0.767434	1.13447	1.13447	0.900901	0.367034	0.500501	1.33467	1.43477	1.33467	0.967634	1.56823	1.53487	3.03637	3.57024	2.9029	2.53587	1.7017	1.06773
	2.06874	1.4014	0.600601	0.533867	0.834168	0.700701	0.600601	1.23457	1.66834	2.23557	1.5015	1.23457	1.76844	2.56924	2.5025	2.73607	1.43477	1.76844	3.26994	2.6026	2.26894	2.5025	2.8028	1.56823	1.6016	1.36803	1.26793	1.33467	0.867534	0.867534	0.700701	0.800801	1.23457	1.86854	1.4014	0.934268	1.16783	0.967634	0.367034	0.734067	0.633967	0.367034	0.934268	1.06773	0.700701	0.967634	0.767434	1.2012	0.467134
	7.00701	9.17584	11.1778	10.5772	7.97464	7.97464	5.27194	8.60861	11.5782	21.6884	18.3851	15.9826	24.8582	23.8906	21.4882	17.4508	16.0494	12.9129	8.50851	8.00801	5.13847	6.94027	4.4044	3.87054	2.7027	2.7027	1.96864	1.63497	2.46914	2.16884	2.1021	2.03537	1.6016	1.7017	1.83517	1.6016	1.53487	1.36803	1.5015	1.43477	1.86854	1.73507	2.36904	2.46914	3.9039	2.73607	2.03537	2.6026	1.83517
	1.86854	2.36904	3.7037	3.33667	2.16884	3.7037	5.70571	8.44178	14.2476	17.8846	17.8178	16.1161	12.4458	16.5499	16.4164	10.9443	8.54188	8.34168	7.14047	5.03837	6.20621	2.73607	3.23657	4.27094	3.73707	2.33567	1.33467	1.36803	0.967634	0.834168	1.03437	0.667334	1.16783	1.13447	1.36803	1.06773	1.5015	1.4014	2.9029	2.6026	1.63497	1.06773	0.867534	1.13447	0.900901	0.900901	0.600601	1.4014	0.934268
	8.57524	9.14248	12.2456	9.27594	6.03937	5.73907	8.00801	9.94328	18.3517	29.4962	37.2039	30.1635	23.3901	19.4194	13.9473	14.5145	12.1788	10.8775	9.37604	13.647	19.5195	24.5579	14.9483	11.7451	15.2819	11.5115	6.10611	4.4044	6.20621	3.33667	2.73607	4.97164	2.6026	2.86954	3.37004	2.13547	1.66834	2.46914	3.53687	2.13547	2.96964	4.5045	0.934268	1.66834	1.03437	1.23457	1.5015	1.56823	1.26793
	2.43577	5.47214	3.73707	3.3033	3.73707	3.53687	4.33767	5.27194	12.4458	7.57424	8.94228	8.37504	9.84318	9.14248	8.00801	6.00601	5.90591	5.07174	4.1041	5.13847	4.67134	3.87054	3.73707	3.16984	2.8028	2.56924	2.83617	4.33767	3.03637	1.46813	1.8018	1.3013	1.001	1.001	1.43477	1.001	1.13447	1.03437	1.6016	0.800801	0.700701	0.667334	0.934268	1.36803	1.3013	1.73507	1.4014	1.86854	1.1011
	5.10511	9.70971	8.34168	3.77044	2.46914	1.53487	3.6036	5.27194	9.44278	24.9583	25.1585	19.9867	19.8532	14.7481	15.1485	18.5853	14.7481	13.0797	16.7501	14.9816	10.2102	4.67134	3.37004	2.76944	1.73507	2.4024	2.4024	1.9019	1.76844	2.5025	1.33467	2.7027	4.6046	1.86854	1.001	1.33467	2.16884	1.06773	0.800801	0.967634	0.967634	0.867534	1.43477	1.63497	1.4014	1.3013	1.16783	0.767434	0.667334
	2.86954	3.37004	4.53787	3.3033	2.66934	2.13547	2.76944	3.53687	5.73907	10.3103	11.7451	13.9473	6.53987	7.74107	7.80781	6.90691	8.44178	5.23857	5.83917	4.4044	3.97064	5.27194	4.57124	5.60561	3.73707	2.6026	2.6026	1.43477	0.934268	1.16783	1.16783	0.633967	1.53487	1.43477	2.63597	1.96864	1.7017	3.67034	4.07074	2.6026	1.9019	3.9039	1.76844	2.26894	1.33467	0.867534	0.900901	2.2022	1.7017
	12.6793	11.4448	6.94027	6.07274	7.40741	4.93827	5.93927	9.80981	21.2546	26.0928	28.0614	19.6196	17.7511	22.6226	17.8846	13.3133	13.9806	9.10911	7.44077	9.17584	6.67334	9.00901	8.27494	8.17484	6.07274	7.04037	6.70671	7.20721	5.57224	6.33967	5.57224	2.16884	2.7027	2.1021	2.23557	2.93627	3.5035	4.13747	4.87154	4.67134	3.37004	2.2022	2.46914	1.93527	1.3013	2.06874	2.66934	2.43577	2.7027
	9.27594	14.3143	11.8118	6.50651	4.13747	7.10711	7.04037	9.94328	13.9473	13.5469	17.7845	18.8188	16.65	12.7794	13.9473	12.5125	14.4144	9.47614	8.90891	5.50551	3.73707	4.1041	4.8048	5.07174	4.87154	4.004	4.63797	5.70571	3.93727	5.33867	3.003	2.002	3.2032	4.004	6.37304	7.20721	5.30531	4.87154	3.43677	4.1041	2.3023	2.76944	2.83617	3.2032	2.16884	1.7017	3.93727	3.23657	1.3013
	6.10611	6.40641	5.80581	8.50851	3.77044	3.37004	3.97064	7.97464	13.8805	15.8158	15.2486	14.2142	17.3507	18.285	19.8866	21.8552	27.027	38.6053	32.9329	34.5679	39.5062	31.9987	18.3183	9.84318	5.90591	5.23857	3.3033	2.96964	1.66834	1.76844	2.63597	1.7017	1.5015	1.56823	2.43577	1.66834	1.8018	1.86854	1.36803	2.33567	2.4024	1.86854	1.2012	1.16783	1.76844	1.8018	2.2022	1.93527	1.26793
	11.6116	16.2829	11.378	8.30831	7.10711	7.04037	9.60961	9.54288	21.7217	24.7581	24.9583	32.1321	28.028	22.6894	18.8522	10.7774	9.67634	8.80881	9.04238	5.93927	5.17184	5.17184	3.73707	3.53687	2.33567	3.003	3.1031	2.16884	2.9029	1.9019	1.6016	3.47014	2.86954	2.93627	2.53587	2.66934	1.86854	2.43577	2.4024	3.3033	1.63497	2.06874	1.53487	1.7017	1.93527	2.002	3.5035	3.43677	4.2042
	3.003	4.23757	4.63797	3.8038	2.63597	2.23557	3.2032	3.63697	4.37104	8.30831	6.27294	6.80681	6.57324	4.87154	4.1041	3.2032	3.7037	5.07174	2.6026	2.56924	2.66934	1.7017	1.6016	1.4014	1.43477	1.53487	1.56823	1.16783	0.767434	1.06773	1.06773	0.934268	1.6016	0.767434	0.734067	0.934268	0.800801	0.734067	0.767434	1.66834	2.96964	2.46914	1.63497	2.002	2.93627	2.7027	2.43577	1.66834	1.76844
	14.4478	19.5863	11.7451	8.10811	7.67434	8.20821	10.4438	11.6783	23.9573	29.1625	29.5629	26.8268	15.015	11.0777	7.57424	5.50551	6.17284	4.4044	4.1041	4.4044	2.96964	3.26994	5.70571	6.53987	5.70571	3.16984	2.73607	4.004	3.57024	2.6026	3.57024	5.43877	3.63697	3.87054	2.16884	1.96864	2.002	1.6016	1.46813	1.9019	1.56823	2.06874	2.43577	1.76844	3.23657	2.3023	1.66834	3.06974	1.73507
	7.74107	7.37404	9.44278	7.20721	5.23857	4.17084	4.3043	10.1101	14.3143	19.1191	18.4518	18.6854	19.019	19.7197	21.3213	17.651	19.7531	23.0898	21.0878	19.4862	16.7501	14.5145	9.87654	6.50651	4.97164	3.26994	3.77044	3.1031	3.97064	3.6036	3.93727	3.53687	5.97264	4.73807	4.5045	4.37104	3.87054	2.9029	2.36904	2.36904	2.2022	2.26894	2.6026	1.23457	1.63497	1.16783	1.16783	0.867534	0.867534
	3.3033	2.53587	0.967634	0.633967	1.6016	2.26894	3.16984	4.53787	3.37004	5.53887	3.9039	4.97164	6.17284	8.94228	7.94127	7.87454	14.3477	12.1788	13.1798	9.14248	14.1141	11.0777	9.17584	8.00801	7.67434	10.644	10.0767	8.24157	6.63997	6.57324	5.27194	2.36904	4.1041	3.3033	2.43577	6.13947	5.10511	5.03837	6.13947	7.50751	7.70771	10.377	4.07074	2.36904	1.9019	1.13447	1.2012	1.33467	1.36803
	6.13947	6.94027	6.17284	4.6046	2.36904	1.6016	3.26994	7.64097	10.8775	11.6116	14.2142	13.2132	6.47314	7.60761	6.77344	6.07274	6.90691	7.10711	8.44178	7.94127	8.37504	8.10811	6.40641	4.63797	3.8038	3.97064	5.27194	4.37104	5.37204	5.57224	5.80581	3.57024	3.53687	2.8028	4.03737	5.47214	3.57024	4.9049	6.07274	4.1041	4.5045	6.60661	7.67434	8.67534	7.34067	9.14248	7.87454	8.84218	6.13947
	5.67234	8.00801	2.93627	2.1021	1.73507	4.33767	5.97264	6.74007	6.57324	6.27294	7.07374	6.23957	5.30531	6.40641	3.93727	7.14047	6.74007	5.37204	6.77344	5.70571	5.10511	3.7037	2.56924	2.03537	1.8018	2.1021	1.3013	1.76844	1.26793	1.001	0.867534	0.834168	0.767434	0.767434	0.834168	0.633967	0.934268	1.001	1.8018	3.93727	1.96864	2.03537	1.43477	0.834168	0.967634	1.4014	1.3013	2.33567	1.33467
	11.9119	11.7117	7.90791	7.80781	5.57224	5.33867	6.84017	7.37404	11.6783	14.381	14.4144	10.2769	11.378	10.2769	10.8442	8.17484	7.94127	9.57624	9.07574	5.30531	5.53887	4.37104	3.97064	3.97064	3.73707	2.26894	1.96864	2.93627	3.003	2.46914	3.03637	3.67034	4.2042	3.63697	6.07274	4.87154	2.86954	2.13547	1.8018	2.56924	2.5025	2.73607	3.1031	3.4034	3.53687	2.96964	4.97164	3.2032	4.17084
	7.34067	5.30531	3.73707	1.56823	1.83517	2.16884	2.4024	3.5035	3.03637	3.5035	5.57224	5.40541	6.03937	6.17284	5.63897	4.6046	4.07074	3.13647	2.73607	4.43777	3.16984	5.63897	5.03837	5.80581	4.03737	4.33767	4.43777	5.40541	5.87254	7.14047	6.57324	6.40641	6.37304	7.07374	5.80581	7.17384	8.87554	5.73907	4.8048	4.67134	6.10611	6.87354	5.97264	4.77144	3.13647	2.86954	2.5025	4.3043	4.07074
	2.2022	1.93527	1.13447	0.333667	0.700701	0.467134	0.967634	0.266934	0.433767	0.433767	0.600601	0.467134	0.800801	0.734067	0.2002	0.467134	1.001	1.56823	1.001	0.900901	0.433767	1.46813	1.3013	1.6016	2.1021	2.43577	1.76844	3.16984	2.83617	3.87054	2.23557	1.13447	1.06773	1.56823	1.26793	2.46914	1.23457	1.8018	1.53487	1.2012	0.533867	0.667334	1.5015	1.26793	1.13447	1.13447	1.001	0.967634	1.2012
	16.0827	19.6864	12.9129	10.0767	4.13747	3.77044	2.03537	1.73507	6.17284	8.94228	7.14047	4.17084	4.43777	3.77044	4.77144	2.53587	2.76944	3.23657	3.3033	4.03737	8.00801	6.03937	3.57024	2.6026	1.8018	2.43577	2.13547	1.96864	1.23457	1.53487	1.93527	1.56823	1.76844	2.16884	1.93527	2.83617	2.7027	2.5025	1.53487	2.46914	1.33467	1.36803	1.36803	1.33467	1.83517	1.5015	1.26793	1.7017	2.1021
	3.97064	3.26994	2.9029	1.6016	0.867534	0.767434	0.633967	1.5015	1.83517	3.003	2.3023	3.53687	2.26894	2.43577	2.13547	3.43677	2.93627	1.56823	0.834168	1.26793	1.1011	1.73507	2.6026	2.53587	2.13547	1.46813	1.2012	1.46813	1.93527	1.13447	0.867534	1.16783	0.934268	0.500501	0.433767	0.800801	1.2012	1.7017	1.5015	2.1021	0.967634	0.2002	0.567234	0.734067	0.700701	1.001	0.467134	0.467134	1.3013
	9.30931	16.65	14.381	11.0777	4.6046	5.27194	4.67134	5.80581	12.4458	18.4184	12.7794	17.7177	16.9837	24.4244	23.6236	35.3353	28.5953	24.9249	33.5669	30.9977	15.1151	17.3841	13.5135	10.5105	5.23857	5.60561	6.17284	7.67434	7.10711	6.70671	4.2042	2.53587	4.3043	2.26894	2.2022	1.4014	1.3013	2.002	1.26793	2.96964	1.53487	0.266934	0.567234	0.734067	0.667334	0.834168	1.46813	0.600601	0.567234
	11.9786	12.7794	14.7814	12.1788	10.2102	9.97664	6.97364	12.4458	27.0938	23.657	16.7501	20.4538	22.3891	16.0827	9.97664	7.77444	9.70971	8.27494	10.0767	11.1111	6.90691	10.3103	10.7441	8.67534	7.74107	7.57424	3.33667	5.07174	4.37104	2.4024	1.5015	2.23557	1.36803	1.93527	2.33567	1.73507	1.36803	0.800801	1.2012	2.2022	2.53587	0.667334	0.700701	1.03437	1.26793	0.734067	0.500501	0.800801	2.33567
	20.3203	18.5853	13.9139	11.5115	9.30931	8.34168	9.47614	14.4811	16.2162	16.9837	23.5903	23.5569	10.377	13.1798	14.9816	12.2789	14.0474	13.4134	12.8462	13.1798	11.1111	4.93827	7.27394	4.77144	4.9049	3.5035	3.13647	3.73707	3.67034	3.4034	3.5035	1.93527	2.46914	2.06874	2.2022	4.03737	3.53687	1.83517	0.900901	1.23457	2.1021	1.33467	2.93627	1.46813	1.5015	2.2022	2.16884	1.73507	1.06773
	0.133467	0.166834	0.1001	0.600601	0.3003	0.433767	0.433767	0.3003	0.433767	0.333667	1.13447	0.3003	0.633967	0.367034	0.333667	1.1011	1.4014	1.43477	1.03437	0.467134	0.333667	0.4004	0.600601	0.567234	1.5015	1.23457	1.03437	0.567234	0.934268	1.73507	0.700701	0.667334	0.3003	0.834168	0.233567	0.567234	0.233567	0.367034	0.567234	0.333667	0.333667	0.800801	0.800801	0.834168	0.266934	0.567234	0.433767	0.500501	0.633967
	11.2112	10.644	7.80781	7.87454	6.13947	5.87254	7.30731	6.13947	10.8442	16.1495	14.648	10.3103	7.24057	7.10711	7.14047	6.87354	7.17384	5.97264	3.93727	3.8038	3.23657	2.46914	3.4034	3.73707	4.13747	2.6026	4.03737	2.86954	2.43577	3.26994	3.3033	1.5015	1.73507	2.26894	1.46813	1.66834	2.4024	3.3033	3.47014	2.93627	5.27194	5.70571	9.87654	12.4124	7.67434	3.73707	2.1021	2.03537	1.6016
	9.24258	9.47614	4.47114	6.30631	6.30631	2.33567	2.8028	4.004	7.47414	7.94127	6.23957	7.10711	4.57124	6.10611	5.53887	8.27494	6.07274	5.30531	6.13947	5.87254	6.20621	4.87154	6.47314	10.1768	6.97364	3.77044	3.57024	5.97264	6.10611	4.5045	2.66934	3.43677	3.2032	3.5035	3.5035	3.33667	3.7037	6.50651	6.03937	3.4034	5.43877	4.9049	1.46813	2.86954	1.63497	0.700701	1.16783	1.43477	2.13547
	11.5782	15.4488	8.20821	4.63797	4.57124	5.17184	3.3033	6.27294	12.8128	17.1505	17.6844	16.5832	11.4114	12.8128	15.1151	12.7794	12.4458	16.0827	18.5519	16.4498	11.6783	14.014	10.1101	9.87654	10.2102	9.90991	4.47114	3.73707	3.26994	4.47114	4.87154	3.77044	4.73807	4.53787	4.2042	3.16984	5.73907	4.47114	3.93727	2.26894	1.53487	2.46914	1.93527	2.1021	1.5015	1.66834	1.2012	2.1021	1.76844
	9.94328	11.9119	9.37604	9.77644	7.94127	7.17384	6.40641	18.018	33.3333	39.5062	37.7044	32.6326	17.5509	12.9129	8.84218	8.80881	8.00801	8.70871	8.17484	10.8108	15.0817	12.4124	13.38	9.87654	5.67234	4.67134	8.04137	7.34067	4.43777	3.003	1.33467	1.93527	2.46914	1.76844	2.06874	1.9019	2.4024	2.1021	1.3013	1.13447	0.867534	1.56823	1.8018	0.900901	1.001	0.934268	1.001	1.03437	1.33467
	6.20621	15.8492	11.4448	6.30631	5.33867	4.6046	6.17284	7.14047	12.2789	20.1869	33.6003	29.3961	25.8926	23.2232	17.9513	17.284	19.4528	28.7287	32.8662	37.4708	43.1765	43.5769	24.5579	12.4124	10.9776	5.23857	2.03537	1.3013	2.06874	1.4014	0.834168	0.800801	0.800801	0.567234	1.63497	0.967634	0.967634	0.500501	1.23457	0.667334	0.533867	0.834168	0.700701	0.800801	0.934268	0.433767	0.767434	1.5015	0.867534
	0.1001	0.367034	0.4004	0.0667334	0.133467	0.133467	0.133467	0.133467	0.333667	1.001	0.734067	1.06773	1.56823	1.9019	0.934268	2.66934	2.002	2.06874	3.67034	2.13547	1.63497	1.23457	0.600601	0.700701	0.567234	0.633967	0.600601	0.867534	0.333667	1.33467	0.533867	0.500501	1.76844	0.600601	0.4004	0.233567	0.500501	0.567234	0.767434	0.166834	0.133467	0.3003	0.467134	0.433767	0.467134	0.700701	0.500501	0.133467	0.333667
	14.2142	27.8946	19.0858	12.7794	10.4104	8.00801	8.44178	12.2456	17.2506	27.6276	21.5549	19.1525	16.2829	13.4801	13.8138	12.4458	9.00901	7.24057	7.64097	8.54188	4.63797	3.13647	4.97164	3.47014	4.6046	5.13847	4.53787	2.56924	2.7027	3.2032	2.8028	5.20521	3.4034	2.5025	2.93627	2.46914	3.77044	2.3023	2.36904	2.86954	2.06874	2.002	2.16884	1.001	1.53487	2.23557	1.5015	1.2012	1.5015
	6.60661	5.63897	5.13847	5.87254	2.23557	1.76844	2.7027	6.07274	6.40641	11.2112	11.3113	14.9149	13.5802	10.6106	14.4811	11.2446	14.8482	17.9179	24.1575	17.8178	16.4164	15.1151	15.5822	13.4134	10.1768	7.30731	7.07374	3.1031	3.2032	3.5035	4.07074	3.16984	3.2032	3.1031	3.16984	2.1021	1.46813	1.33467	1.4014	1.06773	0.934268	1.26793	0.600601	1.3013	1.5015	1.63497	1.16783	0.967634	1.06773
	5.43877	11.645	8.60861	7.70771	6.67334	5.63897	7.67434	12.6793	33.5335	45.9126	27.7277	39.6063	40.04	35.5022	26.1929	21.021	19.3193	16.4831	14.8148	9.94328	16.9169	22.3557	16.3163	10.6106	5.90591	8.10811	4.13747	4.83817	2.93627	1.23457	1.6016	1.001	1.66834	1.56823	1.56823	1.1011	0.800801	1.26793	1.5015	1.46813	1.6016	1.3013	1.53487	1.76844	1.96864	1.8018	1.001	0.4004	0.500501
	12.5792	10.0434	5.83917	5.57224	3.06974	1.7017	2.2022	3.1031	8.30831	7.44077	6.77344	8.84218	7.64097	6.84017	6.30631	8.37504	5.27194	3.26994	3.5035	4.9049	2.6026	2.9029	3.77044	3.73707	4.17084	3.3033	3.53687	3.2032	3.16984	2.56924	2.002	1.7017	1.66834	1.36803	1.6016	1.4014	1.9019	2.33567	2.73607	2.76944	2.46914	2.7027	1.9019	2.5025	3.33667	3.4034	2.16884	3.67034	2.66934
	16.2162	13.0797	14.4811	16.2496	11.011	14.6813	12.1455	21.8218	27.5943	27.661	22.289	15.4488	14.6146	21.3881	22.4892	22.9897	17.6844	17.1505	16.4164	20.3871	24.3577	18.7521	18.8856	11.4448	8.77544	6.60661	6.84017	5.20521	3.33667	1.33467	1.36803	2.002	1.73507	1.83517	1.66834	1.46813	1.93527	1.83517	1.53487	1.13447	0.4004	0.467134	0.4004	0.700701	0.433767	0.867534	0.500501	0.500501	0.3003
	6.30631	5.80581	6.53987	5.87254	6.40641	5.10511	5.57224	7.44077	12.6126	11.7117	13.5469	11.645	9.90991	11.5115	8.77544	9.67634	8.44178	8.67534	9.34268	7.97464	7.90791	8.87554	9.44278	6.97364	5.67234	6.13947	6.03937	4.37104	4.97164	3.77044	4.77144	4.37104	4.4044	4.23757	3.8038	3.5035	3.47014	3.06974	3.003	2.76944	2.93627	3.7037	2.56924	3.33667	2.9029	2.6026	3.03637	4.43777	2.43577
	20.4872	10.01	7.07374	4.83817	4.9049	9.04238	13.6136	13.4468	15.5155	15.1151	12.8795	17.284	23.9907	26.5265	28.5285	47.1138	53.4535	43.8105	55.8225	33.2666	21.9887	15.0817	10.5105	8.04137	7.77444	4.3043	5.80581	6.33967	4.63797	3.57024	2.53587	1.93527	1.56823	0.567234	0.767434	0.433767	0.700701	1.36803	1.001	1.4014	0.767434	0.367034	0.266934	0.367034	0.4004	0.500501	0.433767	0.333667	0.233567
	21.9219	15.2152	10.6106	7.34067	5.17184	6.10611	12.7461	12.5125	10.3103	10.5772	11.6783	10.01	13.2132	10.377	8.44178	10.0434	8.40841	8.50851	8.87554	5.83917	4.07074	4.6046	5.70571	5.80581	5.03837	3.6036	2.8028	1.86854	3.13647	1.63497	2.16884	1.5015	1.46813	1.5015	1.43477	1.1011	0.900901	1.43477	1.36803	1.46813	1.83517	2.73607	1.43477	1.9019	3.77044	4.23757	1.93527	2.56924	2.86954
	4.53787	3.57024	2.3023	2.53587	3.16984	3.93727	4.17084	5.40541	5.20521	4.77144	3.6036	2.6026	3.1031	2.4024	1.83517	2.9029	3.03637	3.57024	2.56924	2.23557	2.26894	1.26793	1.76844	2.1021	1.93527	1.13447	0.967634	0.633967	0.3003	1.06773	1.3013	0.867534	0.900901	0.567234	0.967634	1.03437	0.934268	0.467134	1.001	1.9019	2.6026	1.76844	1.36803	1.73507	1.86854	1.6016	0.800801	0.767434	1.53487
	8.709	9.864	7.4	6.034	4.607	4.411	5.246	7.985	13.53	16.22	14.82	13.81	12.57	12.17	11.02	10.8	10.65	10.01	10.29	9.282	8.687	8.225	6.742	5.44	4.552	3.892	3.394	3.278	2.912	2.63	2.369	2.185	2.331	2.092	2.2	2.218	2.194	2.174	2.199	2.239	2.079	2.186	1.968	2.078	1.967	1.812	1.668	1.823	1.601
	0.9049	0.9267	0.7192	0.6159	0.4657	0.4546	0.5375	1.013	2.048	2.178	1.607	1.447	1.371	1.291	1.146	1.319	1.376	1.349	1.56	1.332	1.343	1.272	0.8118	0.5232	0.4477	0.3828	0.3186	0.3	0.2679	0.2617	0.2299	0.2153	0.2166	0.2008	0.2213	0.2518	0.2418	0.2165	0.2239	0.2055	0.2316	0.2938	0.2655	0.3037	0.2268	0.2073	0.1952	0.2166	0.1702
	3.971	4.938	2.936	2.102	2.169	1.768	2.402	3.504	5.205	5.539	5.572	4.972	5.305	4.872	4.104	4.271	4.071	3.57	3.504	3.871	2.669	2.503	2.669	2.536	1.935	2.269	1.568	1.468	1.235	1.235	1.068	0.9343	1.168	1.134	1.001	1.034	1.134	1.068	1.235	1.201	0.9676	0.8342	0.8675	1.001	0.9676	0.9343	0.9009	0.8675	0.8675
	7.007	9.476	6.94	5.873	4.137	4.171	4.338	6.74	11.58	13.55	13.55	13.95	11.38	10.61	8.775	8.375	8.442	8.275	7.641	5.839	5.172	4.872	4.805	4.505	4.037	3.203	2.836	2.97	2.903	2.169	2.002	1.935	1.735	1.835	1.835	1.668	1.802	1.835	1.535	2.135	1.835	1.735	1.535	1.635	1.502	1.602	1.268	1.502	1.335
	11.98	14.31	11.44	8.509	6.673	6.673	7.307	10.11	16.22	23.66	22.29	19.62	17.55	18.49	16.42	14.51	14.41	13.08	12.85	11.11	11.68	11.08	9.877	8.175	5.906	5.239	4.538	4.404	3.971	3.57	3.303	3.437	3.403	2.87	2.936	2.936	2.87	2.636	3.003	2.936	2.536	2.703	2.436	2.469	2.903	2.236	2.169	2.336	1.835
	Figure 1I
	WT
	0	0.5	1	1.5	2	2.5	3	3.5	4	4.5	5	5.5	6	6.5	7	7.5	8	8.5	9	9.5	10	10.5	11	11.5	12	12.5	13	13.5	14	14.5	15	15.5	16	16.5	17	17.5	18	18.5	19	19.5	20	20.5	21	21.5	22	22.5	23	23.5	24
	1.2012	5.77244	10.6773	5.70571	4.6046	3.53687	1.76844	3.06974	3.83717	4.23757	2.7027	1.06773	0.533867	0.433767	0.533867	0.467134	0.333667	0.2002	0.166834	0.266934	0.567234	0.567234	0.867534	0.934268	0.600601	0.667334	0.900901	1.1011	0.767434	0.667334	0.333667	0.133467	0.567234	0.900901	2.96964	8.04137	23.657	12.8795	17.5843	7.00701	7.47414	7.44077	9.50951	6.94027	2.16884	1.1011	0.600601	0.567234	1.53487
	4.004	5.53887	17.1839	21.4548	20.0534	17.3173	14.7814	13.3467	13.1798	8.77544	5.60561	3.47014	3.1031	3.33667	3.93727	2.5025	2.33567	3.23657	2.2022	2.5025	2.2022	2.3023	2.5025	3.06974	7.57424	7.60761	2.4024	2.26894	2.1021	3.57024	3.16984	1.63497	0.900901	1.2012	0.667334	1.43477	1.6016	0.867534	1.3013	1.83517	2.3023	2.73607	1.26793	0.834168	0.500501	1.23457	0.633967	0.567234	0.567234
	0.2002	3.4034	5.80581	5.77244	4.5045	4.8048	7.47414	6.97364	6.94027	3.63697	2.66934	1.5015	2.96964	1.5015	1.6016	1.6016	1.2012	2.2022	1.63497	1.1011	0.734067	1.06773	1.33467	1.63497	0.667334	0.600601	0.367034	0.533867	1.23457	0.533867	0.433767	0.867534	0.734067	0.433767	0.633967	0.900901	0.767434	0.500501	0.433767	0.500501	0.266934	0.533867	0.500501	0.333667	0.4004	0.767434	0.934268	0.467134	0.867534
	2.6026	9.24258	16.3497	24.6246	29.9299	86.4531	98.4651	98.1315	43.3433	23.2232	9.07574	3.9039	3.3033	1.36803	1.73507	0.934268	1.33467	0.734067	0.4004	0.600601	0.633967	1.16783	1.9019	1.13447	0.900901	1.1011	0.667334	0.700701	1.001	1.001	1.4014	2.76944	3.13647	8.60861	7.64097	7.47414	3.3033	1.63497	0.600601	0.934268	0.600601	0.600601	1.56823	1.93527	4.93827	4.53787	0.900901	1.56823	3.97064
	2.93627	4.67134	6.20621	6.07274	2.8028	4.07074	4.5045	6.94027	6.00601	2.26894	1.001	1.36803	1.13447	1.93527	1.46813	1.001	0.767434	0.633967	0.433767	0.367034	1.83517	1.8018	0.2002	0.700701	0.4004	0.533867	0.967634	1.5015	0.533867	0.533867	1.33467	0.633967	0.834168	1.06773	0.633967	0.633967	0.700701	0.367034	0.3003	0.567234	0.867534	0.433767	0.667334	1.76844	0.433767	0.600601	0.533867	0.333667	0.3003
	1.13447	3.8038	6.40641	3.83717	4.4044	4.57124	5.70571	6.10611	5.70571	10.1101	11.8118	24.7915	13.2799	6.90691	4.23757	3.16984	3.77044	2.63597	2.36904	1.96864	2.002	1.7017	2.03537	1.8018	1.23457	1.73507	1.2012	1.56823	2.06874	1.53487	0.934268	2.03537	2.63597	3.003	1.46813	1.33467	1.83517	1.6016	1.9019	1.46813	1.13447	1.03437	1.2012	1.13447	1.03437	2.1021	1.7017	0.800801	2.002
	0	0.533867	3.37004	3.003	4.004	2.46914	1.86854	1.4014	1.36803	1.06773	1.43477	1.83517	1.26793	1.66834	1.86854	1.46813	1.13447	0.667334	0.900901	1.26793	1.23457	1.16783	1.7017	1.26793	1.36803	1.03437	1.36803	0.767434	1.001	1.001	1.8018	0.734067	0.867534	0.734067	0.433767	0.600601	1.4014	1.23457	0.367034	0.800801	0.967634	0.767434	1.63497	1.73507	0.266934	0.934268	1.43477	0.266934	1.16783
	3.97064	10.8775	11.8785	20.4872	16.016	24.4244	83.0497	95.629	50.8842	23.9907	13.9806	11.9119	4.7047	7.84117	9.14248	4.6046	3.5035	3.57024	2.8028	1.93527	2.3023	2.6026	2.73607	1.46813	1.76844	1.83517	1.4014	1.4014	1.9019	1.73507	1.66834	1.4014	2.43577	1.9019	1.66834	1.73507	2.73607	3.03637	2.66934	3.87054	1.76844	1.2012	1.73507	1.3013	0.700701	1.26793	1.76844	1.5015	1.4014
	6.80681	23.7237	8.77544	10.01	17.4508	14.1808	12.7461	13.38	11.4114	10.0767	6.17284	4.004	5.20521	4.43777	3.26994	3.57024	4.67134	3.73707	1.5015	1.9019	2.43577	1.06773	1.43477	1.3013	1.2012	1.63497	0.934268	1.16783	1.1011	1.16783	0.934268	0.900901	1.03437	0.767434	0.734067	0.867534	0.500501	0.800801	0.900901	0.433767	1.03437	5.20521	1.83517	0.700701	0.800801	0.667334	0.800801	0.633967	0.934268
	0	0	0	0	0	0	0	0	0	0	0	0	0	0	0	0	0	0.1001	0.567234	1.46813	1.3013	2.03537	2.86954	3.4034	4.004	6.17284	6.53987	8.80881	11.011	6.13947	5.13847	7.14047	8.37504	4.7047	11.4448	25.292	11.7784	3.73707	7.07374	4.8048	3.16984	2.56924	4.7047	2.9029	2.23557	2.06874	1.73507	2.66934	4.33767
	3.06974	3.73707	2.7027	3.2032	4.13747	10.3103	10.377	5.03837	3.93727	8.17484	5.80581	3.8038	2.23557	2.26894	3.3033	4.13747	5.07174	3.57024	3.53687	4.37104	2.8028	1.23457	1.86854	1.6016	1.26793	1.26793	1.33467	1.1011	2.03537	1.23457	0.934268	1.2012	1.9019	0.900901	1.46813	2.53587	1.9019	1.43477	2.53587	3.9039	1.93527	2.66934	2.46914	2.26894	1.46813	0.934268	1.13447	1.2012	1.7017
	0.233567	2.26894	10.5772	12.8795	5.03837	9.24258	11.011	20.9877	19.9867	32.3991	40.0734	57.4908	57.5576	54.1208	41.7751	12.9129	7.34067	15.649	5.07174	5.00501	3.03637	1.13447	1.63497	0.700701	0.834168	0.867534	1.001	1.2012	0.967634	1.001	1.26793	0.934268	1.33467	1.26793	0.433767	1.16783	0.533867	0.633967	0.500501	0.633967	0.667334	0.3003	0.667334	0.667334	0.4004	0.467134	0.467134	0.767434	0.767434
	2.36904	9.00901	7.64097	4.63797	7.54087	5.83917	10.2436	7.64097	10.5772	8.24157	5.43877	2.6026	1.4014	0.767434	1.43477	1.16783	1.001	2.56924	9.04238	8.24157	2.002	1.83517	0.967634	0.4004	1.13447	1.5015	0.533867	0.800801	0.4004	0.3003	0.4004	0.367034	0.633967	0.333667	0.4004	0.433767	0.233567	0.467134	0.600601	0.3003	0.333667	0.767434	1.001	0.500501	0.633967	0.467134	0.567234	0.734067	0.667334
	6.03937	17.3507	16.9169	18.7187	23.3233	15.4821	15.4154	18.5185	18.2516	14.3477	12.9796	11.4114	4.27094	3.67034	3.23657	1.9019	1.73507	2.002	1.3013	0.867534	1.16783	1.4014	1.06773	0.967634	1.83517	1.63497	1.03437	1.23457	1.3013	0.834168	1.23457	1.03437	0.800801	1.2012	1.33467	1.26793	1.93527	2.36904	2.06874	1.26793	2.3023	1.53487	2.23557	1.9019	2.43577	1.53487	1.26793	1.53487	1.53487
	3.06974	10.1768	13.0797	12.8795	23.29	28.1281	26.0928	40.9743	20.3871	12.9129	9.20921	7.10711	6.53987	4.83817	3.67034	3.03637	3.16984	4.5045	2.4024	3.67034	5.87254	3.67034	3.16984	4.67134	6.74007	5.80581	1.96864	1.8018	2.1021	1.86854	1.9019	1.5015	1.76844	4.2042	1.3013	1.4014	1.9019	1.1011	1.33467	1.43477	0.900901	1.1011	1.5015	1.73507	1.03437	1.9019	3.67034	1.56823	1.93527
	2.2022	9.07574	14.3477	9.94328	10.2769	7.57424	14.2476	15.0484	17.5843	15.9493	20.2536	13.6136	10.8108	9.70971	12.1121	17.3173	39.3393	23.7905	14.8482	22.2222	20.4872	12.8462	5.83917	8.34168	3.63697	1.5015	1.46813	4.1041	3.8038	2.5025	1.2012	1.63497	3.8038	6.60661	4.7047	4.07074	7.40741	4.83817	1.4014	2.6026	2.93627	3.43677	1.76844	0.900901	1.83517	1.001	1.2012	1.33467	1.16783
	8.00801	28.4284	21.3881	33.1665	44.3443	20.9543	21.8218	16.5832	21.288	27.7277	16.383	16.4831	20.3537	11.7117	11.3447	9.74308	6.50651	5.83917	2.93627	2.73607	2.53587	4.2042	3.8038	2.3023	2.53587	1.06773	1.16783	1.001	1.03437	0.767434	0.834168	0.867534	0.967634	0.867534	0.900901	0.800801	1.56823	1.001	1.001	1.4014	1.03437	2.13547	1.2012	2.6026	1.33467	1.8018	0.567234	1.2012	0.834168
	1.96864	3.77044	6.63997	6.17284	5.07174	19.1859	34.1008	11.2446	12.1455	18.9857	16.8836	10.6106	9.20921	7.60761	4.57124	5.43877	4.03737	1.76844	2.73607	3.43677	3.57024	1.66834	2.46914	2.002	2.16884	2.3023	1.8018	1.76844	1.6016	1.7017	2.06874	1.93527	1.66834	1.16783	1.63497	1.43477	1.2012	0.967634	0.967634	1.73507	1.16783	1.33467	1.6016	1.26793	1.76844	3.06974	0.867534	0.834168	1.53487
	4.33767	17.3841	39.9733	22.7895	23.6904	26.9937	25.1251	21.021	13.9806	8.57524	7.44077	5.27194	1.96864	1.26793	1.63497	1.16783	1.46813	1.001	1.1011	1.13447	1.16783	1.001	1.9019	1.3013	1.46813	1.06773	0.834168	1.06773	1.001	0.900901	0.900901	0.700701	0.867534	0.567234	1.001	0.667334	0.867534	0.734067	0.567234	0.867534	0.800801	0.834168	0.900901	1.9019	3.26994	1.33467	1.26793	3.5035	1.13447
	3.7037	17.9179	26.1595	35.4354	33.7671	23.7237	20.3871	17.7177	20.1535	17.5509	20.2202	13.0464	9.24258	6.60661	4.03737	4.1041	3.2032	4.03737	3.37004	2.03537	2.13547	2.16884	1.8018	2.06874	2.73607	3.06974	2.23557	2.83617	2.93627	1.73507	1.66834	1.9019	1.36803	1.3013	2.8028	3.13647	0.867534	2.4024	3.7037	2.53587	3.47014	2.5025	1.8018	1.66834	1.9019	1.53487	2.3023	1.83517	1.8018
	4.23757	10.5105	12.3457	8.37504	10.8442	6.07274	7.40741	8.84218	8.87554	9.14248	5.70571	4.37104	1.46813	1.83517	1.1011	1.2012	1.16783	1.06773	1.6016	1.8018	1.06773	1.6016	1.1011	0.700701	0.567234	2.1021	0.934268	1.13447	0.900901	0.633967	0.800801	0.867534	0.900901	1.13447	0.567234	0.800801	0.333667	0.734067	0.734067	0.567234	1.001	0.333667	0.500501	0.4004	1.3013	2.36904	1.3013	1.03437	0.600601
	3.6036	13.3133	17.8178	25.3921	24.4244	28.4618	27.9279	32.299	16.5165	13.38	12.6126	9.74308	4.83817	5.73907	7.70771	4.4044	8.80881	7.57424	10.377	6.87354	1.36803	1.16783	1.001	1.5015	1.36803	2.76944	4.83817	2.66934	1.73507	1.96864	1.26793	1.16783	1.36803	0.834168	1.16783	1.1011	1.33467	1.53487	1.86854	2.03537	1.7017	2.002	2.1021	2.23557	2.33567	2.36904	2.43577	3.57024	3.6036
	1.43477	6.13947	11.2446	9.40941	6.30631	4.43777	5.43877	5.13847	3.7037	2.86954	5.10511	0.667334	0.700701	0.633967	0.567234	1.03437	1.1011	1.36803	0.967634	0.934268	0.834168	2.5025	4.004	2.6026	3.6036	1.93527	1.03437	1.1011	1.86854	1.83517	0.533867	1.36803	0.834168	0.367034	0.834168	1.06773	1.1011	0.734067	0.467134	0.633967	0.433767	0.600601	0.700701	1.33467	2.4024	1.06773	0.600601	0.867534	1.7017
	0.700701	5.73907	16.7501	21.6884	20.5205	24.6914	18.018	18.3517	15.015	15.5155	15.8825	8.37504	5.27194	5.10511	3.87054	3.5035	4.7047	3.7037	4.73807	3.97064	4.77144	7.20721	4.97164	4.73807	3.26994	2.5025	1.6016	3.97064	2.83617	1.9019	4.83817	2.26894	1.43477	1.7017	1.66834	1.6016	2.03537	2.36904	3.33667	3.8038	3.43677	3.97064	2.26894	3.43677	4.33767	2.53587	2.33567	2.66934	2.8028
	3.2032	6.87354	16.8168	16.9169	17.8512	10.9109	9.30931	7.57424	10.6106	9.87654	12.8462	9.24258	8.20821	6.70671	4.2042	4.63797	3.37004	2.8028	4.33767	2.86954	1.73507	3.67034	2.9029	3.23657	2.63597	5.37204	5.30531	3.9039	3.8038	1.9019	2.002	3.33667	2.53587	2.26894	2.6026	2.6026	2.5025	2.53587	2.9029	1.8018	2.36904	3.47014	1.96864	1.93527	2.43577	2.2022	1.8018	2.56924	2.4024
	2.2022	6.43977	18.5185	20.7207	15.2819	11.8785	17.3507	18.7855	19.1191	9.74308	4.4044	4.6046	3.06974	2.1021	1.73507	2.9029	5.33867	3.06974	2.76944	1.43477	1.46813	1.56823	0.767434	1.5015	0.834168	0.567234	0.967634	1.1011	1.06773	0.734067	0.600601	0.700701	0.467134	0.567234	0.633967	0.700701	0.433767	0.433767	0.533867	0.4004	0.600601	0.367034	0.734067	1.16783	1.001	0.333667	0.4004	0.567234	0.533867
	0.3003	1.66834	3.97064	6.23957	2.26894	1.5015	2.83617	1.6016	2.26894	1.9019	0.4004	0.333667	0.4004	0.233567	0.567234	0.767434	0.233567	0.2002	0.3003	0.500501	0.4004	1.63497	0.333667	0.3003	0.133467	0.3003	0.2002	0.166834	0.166834	0.1001	0.166834	0.3003	0.133467	0.1001	0.166834	0.266934	0.266934	0	0.266934	0.133467	0.3003	0.3003	0.367034	0.166834	0.0333667	0.3003	0.1001	0.233567	0.233567
	1.001	4.43777	3.5035	3.5035	3.93727	6.80681	4.93827	6.13947	4.5045	7.07374	4.6046	4.23757	3.73707	4.17084	2.13547	2.1021	3.43677	3.47014	2.86954	1.53487	2.33567	1.9019	5.50551	4.53787	2.13547	7.54087	6.07274	2.63597	3.57024	3.5035	5.27194	3.13647	5.23857	4.9049	6.84017	3.73707	2.1021	1.53487	2.13547	4.7047	1.8018	1.26793	1.83517	0.867534	1.16783	4.93827	1.5015	1.13447	2.03537
	1.16783	2.76944	4.43777	3.43677	4.23757	7.74107	5.97264	5.97264	10.5772	7.44077	4.77144	3.97064	2.23557	6.53987	5.97264	5.00501	5.37204	1.66834	0.767434	0.800801	0.934268	1.001	0.934268	1.6016	7.30731	4.23757	1.86854	0.667334	0.934268	1.001	2.06874	1.16783	1.33467	0.667334	1.5015	0.967634	0.467134	0.600601	0.533867	0.367034	0.567234	0.333667	0.467134	0.500501	0.967634	2.16884	0.767434	1.16783	1.001
	1.66834	5.87254	3.8038	3.4034	6.33967	7.87454	11.2112	9.84318	8.34168	5.03837	18.5519	4.2042	12.9796	23.2232	20.3203	15.9493	61.7618	30.9977	18.3183	13.2799	6.80681	4.07074	5.33867	4.77144	3.13647	6.77344	4.67134	2.53587	1.23457	2.3023	1.03437	0.934268	1.36803	1.56823	2.1021	2.7027	1.9019	1.1011	1.8018	1.66834	1.3013	1.53487	1.5015	1.8018	1.46813	1.86854	1.03437	0.967634	0.967634
	0.867534	1.3013	3.93727	5.43877	7.34067	6.10611	13.5802	6.80681	6.20621	14.7814	14.8482	7.87454	10.4438	3.2032	2.06874	2.3023	1.5015	2.5025	1.9019	2.13547	1.16783	1.36803	1.26793	2.13547	3.16984	2.002	1.6016	1.5015	1.1011	1.23457	1.001	1.3013	1.5015	1.46813	1.56823	1.001	1.66834	1.56823	1.53487	1.001	1.001	2.63597	1.73507	1.93527	2.66934	3.3033	1.1011	0.667334	1.16783
	0.667334	1.13447	2.53587	4.43777	1.9019	3.77044	3.23657	3.23657	2.13547	0.4004	0.834168	0.367034	0.333667	0.533867	0.266934	0.166834	0.233567	0.1001	0.266934	0.433767	0.433767	0.4004	0.600601	0.233567	0.266934	0.266934	0.333667	0.166834	0.266934	0.2002	0.266934	0.133467	0.367034	0.3003	0.2002	0.2002	0.2002	0.233567	0.367034	0.266934	0.367034	0.700701	0.166834	0.633967	0.166834	0.567234	0.500501	0.533867	0.4004
	3.6036	3.53687	2.43577	4.77144	4.2042	5.13847	7.24057	8.14147	6.70671	10.644	5.00501	2.93627	5.80581	2.86954	1.66834	2.002	1.16783	0.934268	1.8018	2.66934	1.36803	0.900901	1.8018	1.03437	0.700701	1.1011	0.867534	1.1011	0.767434	0.767434	0.567234	0.834168	1.33467	0.834168	1.16783	1.001	0.633967	0.633967	1.23457	0.633967	0.500501	1.3013	0.900901	1.23457	1.3013	1.6016	1.43477	1.43477	1.33467
	10.8442	6.10611	7.40741	8.34168	5.97264	4.57124	4.47114	2.73607	3.53687	4.7047	3.2032	1.43477	4.07074	1.06773	1.83517	3.53687	1.63497	0.867534	0.834168	1.16783	0.600601	0.533867	0.700701	0.700701	0.4004	0.700701	0.834168	0.3003	0.667334	0.834168	0.734067	0.500501	0.867534	0.567234	0.4004	0.667334	0.500501	0.600601	0.567234	0.567234	0.467134	0.600601	0.633967	0.734067	0.967634	1.03437	0.967634	0.934268	1.001
	1.86854	4.1041	6.27294	8.34168	6.63997	4.97164	7.00701	5.53887	4.1041	3.26994	5.70571	16.9169	2.43577	2.06874	3.5035	4.004	3.6036	3.63697	3.7037	3.7037	2.53587	2.002	2.1021	1.33467	1.2012	2.53587	1.001	0.433767	1.2012	1.73507	0.834168	1.001	0.867534	0.600601	0.667334	0.867534	0.467134	0.500501	1.13447	1.16783	0.867534	0.967634	1.001	0.967634	0.867534	1.001	0.834168	0.500501	1.03437
	0.2002	1.1011	2.86954	2.43577	3.97064	7.30731	9.60961	4.6046	4.03737	5.30531	3.93727	1.76844	0.767434	0.333667	0.3003	0.500501	0.3003	0.2002	0.467134	0.266934	0.467134	0.233567	0.4004	0.667334	0.367034	0.734067	0.600601	0.333667	0.333667	0.367034	0.2002	0.934268	0.500501	0.266934	0.266934	0.233567	0.266934	0.2002	0.266934	0.467134	1.3013	2.06874	1.001	1.46813	1.16783	1.1011	0.233567	0.433767	0.900901
	2.1021	5.57224	12.7127	19.1191	22.1555	22.3557	16.9169	32.4658	23.4568	12.2456	26.0928	16.383	14.5812	16.3497	24.8582	22.1889	18.0848	10.5439	5.50551	3.83717	4.57124	2.002	3.97064	3.47014	2.3023	3.23657	2.26894	2.96964	1.8018	1.43477	1.56823	3.57024	6.40641	2.1021	2.23557	1.93527	2.93627	3.9039	5.80581	8.90891	3.4034	2.7027	2.93627	2.66934	1.03437	1.26793	1.86854	3.1031	7.17384
	1.96864	3.23657	11.1445	12.3123	6.20621	7.40741	10.8108	6.77344	6.20621	3.47014	4.27094	3.03637	2.13547	1.2012	1.13447	2.06874	6.37304	1.7017	1.13447	0.734067	0.934268	0.867534	1.001	1.2012	1.66834	1.2012	1.03437	0.700701	0.600601	0.633967	0.567234	0.266934	0.734067	0.667334	0.3003	0.600601	0.633967	0.700701	0.500501	0.500501	0.500501	0.700701	0.834168	0.834168	0.934268	0.967634	0.4004	0.867534	2.16884
	1.9019	8.00801	13.7137	12.2456	13.4468	10.2436	20.8208	17.8846	8.97564	6.00601	11.4448	21.0544	23.4902	13.1465	5.03837	4.1041	5.80581	2.7027	1.66834	2.06874	1.6016	0.967634	2.16884	1.53487	0.934268	1.4014	1.76844	0.967634	1.2012	1.33467	0.767434	0.867534	1.66834	1.5015	0.900901	1.2012	1.5015	2.33567	2.7027	1.56823	2.53587	2.002	1.36803	0.633967	0.967634	0.800801	0.633967	0.867534	0.700701
	1.33467	5.23857	7.14047	5.23857	9.70971	7.17384	5.50551	6.53987	7.37404	4.57124	2.66934	1.53487	2.53587	2.4024	4.07074	4.03737	4.63797	3.03637	4.1041	5.53887	3.13647	3.8038	7.17384	5.73907	11.1778	13.1798	4.53787	2.3023	2.53587	1.96864	1.8018	2.5025	3.06974	3.57024	6.17284	3.87054	3.6036	2.46914	1.93527	1.93527	2.26894	2.46914	1.33467	2.002	2.03537	1.8018	2.43577	2.6026	1.73507
	1.43477	2.73607	2.33567	1.23457	1.86854	2.36904	3.16984	2.53587	2.96964	1.46813	1.33467	1.36803	1.46813	0.667334	0.800801	1.06773	0.233567	0.3003	0.333667	0.333667	1.2012	0.633967	0.166834	0.367034	1.1011	0.734067	1.9019	0.633967	0.500501	0.3003	0.4004	0.767434	0.3003	0.266934	0.3003	0.133467	0.233567	0.2002	0.266934	0.133467	0.333667	1.06773	0.333667	0.166834	0.233567	0.333667	0.2002	0.166834	0.3003
	1.03437	2.63597	4.27094	5.93927	6.77344	7.60761	13.0797	12.1455	14.5812	16.9837	4.6046	2.53587	2.46914	2.63597	2.03537	1.86854	1.86854	2.1021	0.900901	1.1011	1.76844	2.8028	1.8018	2.002	2.2022	1.2012	1.8018	1.03437	1.6016	1.4014	1.2012	2.2022	1.46813	1.66834	1.43477	1.43477	0.967634	1.33467	0.734067	0.834168	0.734067	1.03437	0.967634	0.734067	3.57024	0.934268	1.001	1.4014	1.46813
	1.9019	7.87454	7.20721	11.8785	11.1778	20.0534	24.7915	24.1575	18.7187	9.17584	11.2112	7.04037	3.67034	3.8038	3.003	6.50651	5.40541	5.60561	8.44178	8.57524	5.03837	9.47614	6.20621	3.73707	6.90691	3.67034	4.63797	6.10611	2.9029	4.47114	4.004	1.53487	1.4014	1.33467	1.46813	1.4014	2.23557	1.001	1.13447	0.800801	0.900901	0.900901	1.56823	1.03437	1.43477	4.87154	1.06773	0.467134	1.16783
	2.8028	10.377	17.5175	21.2546	25.7925	23.4902	13.7804	18.8522	12.3123	6.37304	6.17284	7.50751	6.70671	3.37004	2.93627	3.77044	1.86854	1.33467	1.73507	1.93527	1.23457	2.7027	1.3013	1.13447	0.900901	0.900901	0.734067	0.633967	0.633967	0.533867	0.433767	0.700701	0.4004	0.500501	0.600601	0.533867	1.43477	2.53587	2.43577	1.43477	1.43477	1.06773	0.600601	0.633967	0.500501	0.700701	0.934268	0.967634	1.4014
	1.23457	5.60561	5.63897	9.70971	16.5165	14.2142	12.4124	17.3507	11.011	15.3487	16.2496	35.4354	50.6173	61.9286	33.1665	39.6396	23.5569	19.3527	25.8592	31.5315	9.67634	10.4104	6.90691	3.47014	4.27094	3.06974	2.16884	2.06874	2.06874	2.33567	3.13647	2.53587	2.06874	3.77044	2.73607	1.06773	2.002	0.900901	1.16783	1.96864	1.9019	1.76844	1.2012	1.4014	0.734067	1.36803	0.800801	0.633967	1.03437
	3.63697	16.5499	17.1505	12.9129	34.1341	32.3657	20.6874	40.1735	38.305	20.5873	26.0928	17.5843	18.4184	15.0817	7.04037	10.644	8.27494	9.94328	11.0444	5.10511	2.7027	4.53787	2.4024	2.03537	3.93727	5.33867	5.77244	2.53587	0.967634	0.900901	1.2012	1.26793	1.43477	1.03437	1.13447	0.967634	0.900901	0.900901	0.900901	1.23457	1.63497	1.9019	1.56823	0.934268	1.13447	1.53487	1.33467	2.002	2.13547
	5.37204	13.2132	6.63997	7.64097	5.43877	12.4791	13.8138	6.47314	5.63897	3.4034	3.93727	1.8018	2.43577	1.6016	0.734067	0.533867	1.03437	0.600601	0.500501	0.967634	0.633967	0.433767	0.533867	0.433767	2.36904	1.73507	0.867534	0.700701	1.13447	0.266934	0.266934	0.333667	0.233567	0.4004	0.266934	0.3003	0.3003	0.333667	0.633967	0.367034	0.4004	0.4004	0.333667	0.467134	0.4004	0.433767	0.533867	0.967634	1.03437
Mean	2.556	7.421	10.35	11.34	12.33	13.43	15.54	15.97	12.27	10.06	9.397	8.332	7.54	6.82	5.48	4.908	5.804	4.337	3.757	3.685	2.571	2.49	2.329	2.081	2.403	2.556	1.922	1.726	1.666	1.433	1.428	1.422	1.636	1.632	1.791	2.089	2.121	1.586	1.824	1.677	1.472	1.651	1.504	1.433	1.428	1.555	1.126	1.218	1.536
SEM	0.3165	0.8875	1.094	1.239	1.501	2.018	2.606	2.884	1.535	1.082	1.185	1.51	1.653	1.741	1.223	1.015	1.564	0.9139	0.7392	0.8228	0.4717	0.3804	0.2672	0.2414	0.3329	0.367	0.2415	0.2327	0.2428	0.1678	0.1828	0.1743	0.231	0.2537	0.3209	0.557	0.548	0.2901	0.3973	0.2608	0.1872	0.203	0.2099	0.1625	0.1559	0.1622	0.103	0.1253	0.1784
1Q	1.134	3.403	4.271	4.771	4.404	4.972	5.706	5.973	4.505	4.238	3.937	1.802	1.969	1.368	1.468	1.168	1.168	0.9343	0.9009	0.9676	1.068	1.068	1.001	0.9676	0.9009	1.034	0.9009	0.7007	0.9009	0.6673	0.5672	0.7341	0.8008	0.5672	0.6006	0.6673	0.5005	0.6006	0.5339	0.5672	0.6006	0.7007	0.7007	0.7007	0.7007	0.8008	0.6006	0.5672	0.8675
Median	1.969	5.739	7.641	8.375	7.341	7.875	11.21	8.842	10.58	8.775	5.806	4.238	3.67	3.203	3.003	3.036	3.203	2.569	1.902	1.935	1.735	1.668	1.802	1.535	1.668	1.635	1.335	1.134	1.201	1.168	1.034	1.034	1.335	1.068	1.168	1.068	1.335	1.001	1.134	1.168	1.034	1.201	1.268	1.235	1.134	1.268	0.9676	0.9676	1.168
3Q	3.604	10.18	16.35	18.72	20.05	20.05	18.02	18.52	17.58	14.78	13.98	11.41	9.209	6.707	4.571	4.605	5.372	3.737	4.104	3.837	2.703	2.703	2.903	3.07	3.17	3.07	2.169	2.302	2.069	1.869	1.802	1.902	1.768	1.702	1.668	1.735	2.002	2.336	2.069	1.935	1.935	2.469	1.768	1.902	2.035	2.069	1.435	1.535	1.802
	Figure 1J
	WT
	0	0.5	1	1.5	2	2.5	3	3.5	4	4.5	5	5.5	6	6.5	7	7.5	8	8.5	9	9.5	10	10.5	11	11.5	12	12.5	13	13.5	14	14.5	15	15.5	16	16.5	17	17.5	18	18.5	19	19.5	20	20.5	21	21.5	22	22.5	23	23.5	24
	1.9019	5.13847	27.3607	52.1522	123.624	100.4	45.1451	40.4071	15.1151	13.8138	25.659	6.00601	6.40641	11.0444	20.9209	13.9139	11.4114	4.17084	2.6026	2.56924	4.73807	2.73607	2.3023	0.533867	0.900901	0.567234	0.467134	0.4004	0.567234	0.700701	0.467134	0.367034	0.500501	0.767434	1.1011	0.667334	0.867534	0.667334	0.4004	0.367034	0.567234	0.567234	0.133467	0.233567	0.166834	0.2002	0.567234	0.133467	0.166834
	16.2162	53.0531	44.1441	98.5986	38.1715	17.9513	30.5973	20.3537	21.1211	16.2162	8.54188	15.1818	23.8238	16.0494	4.7047	4.13747	4.93827	2.76944	2.96964	2.73607	1.6016	1.33467	1.46813	1.13447	1.93527	1.93527	2.5025	1.2012	0.767434	1.4014	2.002	0.500501	0.567234	0.567234	0.500501	0.433767	0.633967	0.467134	0.700701	1.36803	0.4004	0.533867	0.834168	1.03437	0.600601	0.934268	0.867534	1.26793	1.1011
	0.900901	4.97164	5.20521	8.90891	12.8128	49.8832	102.469	110.344	33.9339	46.7801	71.338	22.8562	4.57124	2.9029	3.43677	3.6036	5.90591	3.5035	3.26994	1.23457	2.2022	1.9019	1.5015	1.03437	1.33467	0.834168	1.03437	0.800801	1.8018	1.4014	3.3033	1.2012	1.83517	1.43477	3.26994	6.43977	1.6016	1.06773	1.13447	0.967634	1.1011	1.5015	1.36803	0.834168	1.06773	0.934268	0.567234	1.3013	0.934268
	1.2012	3.1031	2.93627	0.967634	1.86854	2.002	2.6026	1.86854	2.06874	2.33567	1.73507	2.16884	0.700701	6.40641	1.96864	0.600601	0.667334	0.700701	1.33467	0.734067	1.23457	1.26793	1.1011	0.934268	1.001	1.2012	0.967634	0.533867	1.1011	0.734067	0.734067	0.700701	0.633967	1.06773	1.9019	1.26793	1.2012	1.7017	1.96864	0.700701	1.96864	1.93527	0.600601	0.900901	1.06773	1.2012	1.66834	2.2022	1.33467
	1.9019	3.83717	9.54288	22.5559	95.1618	135.002	91.625	27.5609	17.0838	14.0474	5.93927	4.5045	2.93627	2.73607	2.4024	0.934268	1.3013	0.834168	1.2012	1.1011	0.867534	1.36803	1.66834	1.1011	0.734067	1.46813	1.13447	0.567234	0.767434	4.53787	1.53487	0.633967	0.600601	1.43477	0.900901	1.56823	2.2022	1.96864	0.900901	1.23457	0.633967	0.900901	1.6016	1.06773	1.1011	1.26793	1.1011	0.800801	0.567234
	3.2032	3.1031	5.63897	5.00501	4.57124	6.60661	7.90791	6.60661	6.77344	5.13847	5.67234	2.83617	2.23557	1.56823	4.6046	3.37004	1.3013	1.53487	2.5025	0.867534	1.83517	1.23457	1.13447	1.73507	1.23457	1.5015	1.3013	1.83517	2.56924	1.26793	1.33467	2.23557	1.96864	0.633967	1.13447	0.934268	0.433767	0.967634	0.867534	0.533867	0.767434	0.900901	0.500501	0.867534	0.767434	0.867534	3.03637	4.13747	2.06874
	1.2012	2.73607	3.67034	6.57324	56.7901	185.219	58.2583	66.1995	50.684	17.6176	11.5449	16.0827	10.2769	6.20621	4.07074	5.97264	3.87054	2.3023	2.16884	1.63497	1.36803	0.900901	0.700701	1.03437	0.700701	0.667334	0.600601	0.767434	0.600601	0.734067	0.700701	0.867534	0.800801	0.967634	1.36803	1.53487	1.03437	0.767434	0.734067	1.36803	0.567234	0.667334	0.700701	0.834168	1.06773	0.567234	0.800801	0.500501	1.36803
	5.40541	13.0464	8.67534	9.90991	11.6783	17.8846	29.7297	10.5105	9.94328	8.84218	8.87554	5.57224	7.44077	3.16984	4.3043	4.07074	3.47014	3.87054	5.17184	4.67134	4.67134	4.7047	3.83717	4.87154	4.97164	3.37004	2.13547	3.33667	3.93727	2.06874	3.5035	3.1031	2.73607	2.46914	3.93727	2.53587	2.002	2.86954	2.63597	2.76944	5.70571	4.27094	1.16783	1.36803	2.13547	1.56823	2.16884	3.06974	1.76844
	0.967634	8.64198	8.07474	10.01	15.4488	13.3133	10.5105	25.025	15.382	19.1859	34.6346	12.4791	10.8108	4.57124	4.97164	9.44278	6.10611	29.4294	50.8842	17.5843	3.13647	2.5025	13.38	3.77044	3.4034	1.93527	2.2022	1.26793	4.4044	1.53487	1.53487	2.36904	0.700701	1.16783	1.03437	1.36803	0.900901	0.633967	1.23457	1.03437	1.9019	0.900901	1.2012	0.934268	0.967634	1.36803	1.6016	1.001	0.834168
	0.367034	1.36803	4.1041	6.27294	0.934268	0.800801	0.800801	1.7017	3.93727	7.57424	8.20821	7.67434	6.47314	3.2032	1.96864	3.93727	1.7017	1.46813	1.73507	2.46914	1.8018	2.3023	2.43577	2.13547	1.53487	1.83517	1.13447	1.86854	2.56924	0.934268	1.4014	6.23957	3.47014	1.13447	2.4024	1.2012	2.26894	3.26994	15.5489	5.83917	1.16783	2.53587	1.36803	0.700701	3.13647	1.36803	0.500501	0.767434	4.8048
	3.33667	8.40841	11.1445	24.5913	17.3507	15.2819	16.1495	19.5863	23.4568	47.5475	68.0013	35.5689	10.7774	13.0464	5.73907	6.33967	4.53787	2.8028	3.37004	2.46914	4.57124	10.4438	7.37404	5.70571	6.90691	4.6046	3.7037	3.9039	4.07074	3.6036	2.06874	1.7017	1.4014	1.9019	2.03537	1.1011	0.867534	1.4014	1.26793	2.3023	7.14047	2.43577	0.934268	1.06773	1.96864	0.900901	0.700701	1.1011	1.33467
	0.333667	1.66834	5.37204	4.004	5.97264	6.70671	6.67334	8.30831	17.0504	19.1859	18.5185	13.013	14.3143	11.645	21.655	11.3113	12.7127	20.4204	21.4214	8.60861	6.27294	5.50551	2.43577	4.9049	4.5045	6.63997	4.37104	6.20621	2.16884	2.16884	0.934268	1.13447	1.16783	1.16783	2.43577	2.1021	0.667334	0.934268	1.1011	1.36803	0.934268	1.26793	0.567234	0.633967	0.934268	0.800801	1.06773	0.633967	1.26793
	2.16884	6.13947	6.43977	7.87454	14.4144	7.44077	7.54087	11.0777	26.6934	12.5792	23.023	26.9269	35.5355	54.955	45.8458	43.2432	13.1465	13.2466	5.97264	2.86954	1.9019	1.23457	1.63497	2.13547	1.4014	1.66834	1.46813	1.8018	1.63497	1.1011	1.1011	0.834168	0.834168	0.800801	1.26793	1.4014	0.800801	1.4014	1.36803	1.53487	5.67234	3.1031	3.9039	2.46914	1.86854	0.867534	1.26793	1.23457	2.4024
	0.867534	3.63697	6.63997	7.20721	10.8775	9.87654	14.0474	11.378	15.1818	12.3123	10.3437	6.67334	4.53787	4.33767	3.5035	2.9029	3.77044	5.00501	13.8472	7.07374	4.8048	1.33467	1.4014	2.33567	3.7037	2.96964	2.73607	2.73607	1.13447	1.23457	1.2012	1.001	3.03637	2.83617	0.967634	0.834168	0.734067	0.834168	0.500501	1.03437	0.934268	0.700701	1.56823	1.86854	1.66834	3.37004	2.83617	2.23557	1.5015
	1.83517	8.54188	17.3173	18.8188	13.8805	12.8462	14.5812	10.0767	11.4781	8.74208	7.24057	4.77144	2.66934	8.67534	12.8462	12.9796	8.97564	9.34268	5.73907	3.93727	7.00701	4.67134	1.9019	1.63497	1.93527	2.66934	2.6026	2.16884	2.2022	1.83517	2.4024	3.43677	2.6026	2.2022	2.9029	2.76944	2.7027	2.86954	2.1021	1.16783	1.43477	1.8018	1.33467	1.63497	2.33567	1.33467	1.76844	3.7037	2.7027
	1.23457	6.53987	7.90791	8.30831	5.87254	4.43777	4.97164	4.87154	3.3033	4.87154	8.00801	4.004	2.26894	3.26994	5.23857	5.50551	3.23657	3.47014	1.83517	1.16783	1.16783	1.8018	2.2022	2.2022	2.06874	1.36803	1.36803	1.8018	2.4024	1.53487	1.33467	2.36904	0.934268	1.33467	1.66834	1.1011	1.46813	1.86854	1.03437	1.06773	1.56823	1.43477	1.1011	1.4014	1.001	1.13447	1.76844	2.26894	1.73507
	4.83817	13.4134	9.60961	13.0797	13.3133	8.47514	7.47414	7.40741	5.60561	9.60961	10.5772	12.646	4.03737	5.13847	13.5802	7.14047	3.7037	3.43677	4.67134	4.3043	3.26994	2.13547	1.93527	4.07074	3.43677	2.43577	2.46914	2.93627	2.26894	1.5015	2.43577	5.10511	3.003	1.53487	2.26894	1.5015	1.36803	1.4014	1.06773	0.867534	1.86854	1.66834	2.33567	4.73807	2.73607	2.93627	3.5035	2.4024	1.53487
	2.56924	10.7107	28.7621	27.1271	30.3971	21.9887	23.1231	26.293	25.5255	22.7561	15.4821	21.8552	8.24157	10.644	16.8168	10.1435	9.10911	9.14248	8.34168	6.07274	8.17484	9.27594	3.8038	3.9039	8.34168	8.07474	7.27394	8.14147	5.10511	2.73607	5.83917	4.87154	3.26994	3.2032	5.20521	2.33567	1.96864	2.66934	2.36904	4.4044	12.1788	5.53887	4.4044	3.1031	3.5035	2.26894	3.1031	3.83717	2.6026
	2.06874	6.37304	8.64198	9.47614	14.9483	18.652	16.0827	16.9503	20.5873	17.5175	13.5802	7.70771	17.284	2.83617	3.93727	3.87054	3.1031	2.4024	3.4034	5.50551	6.20621	7.94127	3.63697	2.26894	3.003	1.73507	1.96864	1.9019	1.86854	1.06773	1.53487	2.1021	1.4014	1.73507	2.16884	1.13447	1.001	1.8018	2.002	0.967634	1.46813	1.93527	0.867534	1.8018	3.003	2.3023	1.8018	1.83517	1.8018
	2.2022	6.57324	11.4781	12.1455	9.20921	6.13947	14.6146	16.9503	9.10911	8.67534	9.60961	5.83917	2.53587	2.4024	2.2022	4.17084	4.53787	5.43877	3.43677	5.63897	4.5045	6.74007	5.93927	2.1021	1.63497	1.13447	1.36803	1.46813	1.03437	1.16783	1.56823	1.93527	1.26793	1.86854	1.23457	1.1011	0.967634	0.500501	1.1011	1.1011	1.2012	1.33467	1.76844	1.46813	1.06773	1.06773	1.13447	1.001	2.06874
	2.93627	2.16884	5.57224	7.37404	3.43677	6.20621	6.03937	5.73907	6.20621	5.80581	6.57324	8.60861	9.04238	9.54288	5.97264	3.26994	2.2022	14.4144	14.3143	6.80681	6.53987	2.83617	2.6026	1.6016	2.66934	3.16984	1.23457	1.53487	1.56823	1.16783	1.36803	1.33467	1.93527	1.96864	2.23557	4.2042	8.67534	4.33767	6.77344	2.1021	3.8038	2.23557	2.96964	2.53587	1.16783	2.4024	2.3023	0.834168	0.934268
	0.633967	4.63797	2.4024	5.37204	4.97164	7.87454	7.44077	9.54288	11.9119	10.2769	6.53987	7.67434	4.67134	4.83817	11.1778	14.648	11.0444	12.2789	10.9109	6.40641	3.77044	3.5035	4.33767	3.77044	6.03937	7.20721	5.53887	4.9049	9.80981	4.27094	4.63797	4.73807	2.93627	3.003	3.6036	4.17084	3.003	4.53787	5.00501	2.26894	3.97064	9.27594	4.5045	4.57124	6.60661	5.60561	6.10611	7.87454	11.6116
	3.23657	6.30631	7.90791	20.02	16.8502	17.2172	18.8188	16.8502	12.2456	11.011	24.3577	22.3557	29.1291	21.9887	11.9453	10.1435	11.378	36.036	17.8178	29.4962	31.3647	4.3043	4.2042	2.66934	2.63597	2.43577	7.40741	1.46813	1.86854	2.83617	1.8018	1.33467	1.06773	2.5025	2.36904	2.6026	3.03637	2.1021	2.66934	3.1031	1.36803	2.4024	1.96864	1.63497	0.867534	1.53487	0.900901	0.633967	1.36803
	1.7017	9.24258	15.7157	15.2152	21.3547	17.8846	30.6306	28.4284	16.65	12.4124	11.8785	9.00901	10.9776	6.97364	5.57224	2.53587	2.5025	3.47014	4.63797	3.67034	2.76944	4.03737	5.80581	6.17284	4.7047	2.93627	3.6036	2.9029	2.6026	2.33567	1.53487	1.36803	2.66934	1.93527	1.63497	2.5025	2.86954	2.3023	2.36904	2.002	2.1021	2.13547	4.03737	4.33767	5.10511	4.97164	3.47014	4.004	4.3043
	0.900901	4.57124	17.5843	20.1535	18.8522	14.5812	24.5913	32.0654	19.5529	22.3223	32.032	11.1111	11.6783	9.37604	4.93827	6.37304	4.5045	6.23957	5.00501	5.33867	3.83717	7.60761	5.17184	4.97164	4.53787	3.23657	3.8038	3.37004	3.26994	2.9029	2.5025	3.93727	4.37104	3.26994	2.53587	3.3033	1.93527	2.53587	2.5025	3.37004	2.5025	2.8028	2.73607	2.1021	1.73507	2.93627	2.8028	2.66934	3.2032
	0.133467	4.6046	30.2636	98.8989	95.5289	70.704	56.957	6.30631	6.10611	6.27294	6.94027	3.53687	5.27194	4.77144	3.26994	6.27294	24.1909	17.1839	19.1859	2.36904	4.17084	9.77644	2.9029	1.9019	1.6016	1.63497	2.13547	1.16783	0.967634	2.76944	1.93527	1.8018	1.001	11.2779	3.6036	1.7017	4.93827	6.50651	2.66934	0.900901	0.800801	0.266934	0.734067	0.4004	0.500501	0.834168	0.767434	0.700701	1.43477
	2.3023	3.33667	7.87454	7.97464	14.014	12.7127	31.2312	24.9249	31.4314	34.3677	41.0744	32.1321	40.9409	15.6156	7.04037	5.50551	7.57424	5.77244	4.63797	6.27294	3.4034	7.87454	8.90891	4.87154	2.6026	2.06874	2.4024	2.26894	1.53487	2.43577	4.07074	2.46914	1.16783	1.4014	1.7017	2.43577	3.06974	2.3023	2.5025	1.63497	1.26793	1.8018	1.56823	0.934268	1.46813	2.06874	1.4014	2.002	1.86854
	0.700701	3.1031	17.6176	27.9279	61.8952	57.5242	43.6436	28.3283	26.1595	19.1859	15.649	10.1768	16.8168	4.33767	4.97164	9.54288	6.07274	3.2032	3.67034	8.24157	3.26994	5.07174	16.2496	41.4081	14.7147	14.5145	11.1111	3.16984	4.63797	2.33567	2.3023	6.00601	2.002	1.73507	3.06974	3.63697	3.06974	1.56823	1.66834	4.63797	1.1011	1.36803	0.500501	0.800801	0.533867	0.633967	0.800801	1.73507	0.834168
	1.33467	1.86854	4.3043	4.27094	6.07274	3.97064	5.80581	7.54087	7.57424	4.17084	15.3487	4.87154	2.73607	1.23457	1.8018	1.33467	3.77044	14.0474	6.07274	2.36904	1.9019	0.900901	1.53487	1.33467	1.3013	1.6016	1.001	0.667334	0.533867	1.1011	0.967634	1.16783	0.533867	0.266934	0.567234	0.734067	0.3003	0.4004	0.967634	0.4004	0.333667	0.4004	0.4004	0.4004	1.03437	1.03437	1.23457	0.600601	1.06773
	0.266934	0.667334	2.73607	3.93727	11.3447	20.2536	25.7925	18.3183	24.658	17.284	15.382	7.77444	10.5105	9.40941	3.03637	3.23657	3.3033	2.43577	2.5025	1.3013	1.7017	1.06773	1.43477	2.9029	2.73607	1.56823	0.633967	0.800801	1.4014	2.13547	1.23457	1.3013	1.33467	1.36803	1.93527	1.56823	2.26894	1.63497	2.002	1.96864	3.2032	1.36803	1.5015	1.63497	2.13547	1.66834	2.2022	1.36803	1.46813
	1.1011	6.67334	10.4771	9.67634	11.8452	6.90691	11.1778	12.6793	7.90791	7.27394	6.57324	5.33867	8.54188	7.14047	8.10811	10.01	3.26994	4.004	6.60661	9.77644	10.3437	11.7117	4.77144	3.23657	1.83517	2.56924	1.7017	0.967634	1.3013	1.93527	1.16783	1.13447	2.03537	1.43477	2.2022	2.8028	1.26793	0.867534	1.53487	1.76844	1.73507	1.86854	1.9019	0.767434	1.06773	2.2022	1.56823	3.16984	1.83517
	2.06874	4.1041	15.5155	17.4174	25.5255	30.5305	44.8448	24.5913	37.304	26.9603	28.0948	33.033	19.9867	5.47214	4.004	11.9119	43.31	90.1902	28.8956	11.2779	7.30731	7.60761	5.13847	2.6026	2.16884	2.7027	1.46813	1.13447	3.23657	3.33667	1.001	1.66834	3.2032	1.83517	1.6016	1.83517	1.26793	1.33467	1.9019	1.56823	1.16783	1.36803	1.66834	1.03437	1.86854	2.4024	1.001	0.567234	1.16783
	4.53787	10.2436	18.018	18.6854	19.0524	21.7885	18.8522	28.0614	19.3861	13.6803	17.0838	23.023	13.0797	13.8805	4.17084	2.96964	5.17184	2.3023	1.76844	1.86854	2.5025	6.13947	9.24258	2.93627	2.36904	3.003	2.86954	5.17184	3.06974	1.83517	1.46813	2.33567	2.2022	1.73507	2.002	1.36803	2.23557	1.83517	4.004	1.96864	1.86854	1.36803	1.5015	1.5015	1.4014	1.3013	1.33467	6.03937	9.97664
	1.63497	5.83917	8.44178	16.4164	21.8552	25.4588	23.29	17.4508	20.0868	16.3163	17.5175	21.8552	16.65	24.6246	14.1475	8.04137	6.57324	7.04037	15.7491	7.27394	4.57124	5.40541	10.7107	2.66934	2.2022	2.36904	1.56823	1.53487	2.33567	3.87054	2.8028	2.73607	3.8038	2.83617	1.4014	1.13447	1.63497	1.16783	0.900901	0.767434	1.43477	1.13447	1.33467	1.43477	1.46813	1.4014	0.934268	1.06773	1.03437
	1.6016	6.20621	12.7127	15.8158	10.5105	9.57624	11.5449	15.9826	9.60961	8.00801	11.7784	18.9189	13.013	6.84017	3.03637	2.26894	2.36904	2.8028	4.53787	4.47114	2.03537	3.2032	2.06874	2.83617	1.001	0.834168	1.2012	1.16783	1.43477	1.83517	2.93627	1.43477	1.23457	1.43477	3.57024	3.73707	1.66834	1.9019	4.17084	0.934268	1.2012	1.1011	1.001	1.8018	1.5015	0.934268	1.16783	1.73507	1.13447
	0.667334	4.57124	4.53787	7.04037	15.2152	9.30931	9.30931	13.3467	12.6793	8.60861	10.1768	6.17284	4.93827	8.24157	6.00601	4.2042	5.07174	4.3043	2.76944	2.23557	2.2022	1.33467	3.03637	1.73507	1.96864	2.002	1.4014	1.8018	1.7017	1.7017	2.9029	1.93527	1.66834	1.66834	1.06773	2.13547	1.7017	0.633967	0.834168	1.06773	0.734067	0.934268	1.6016	1.26793	1.33467	1.6016	1.001	1.53487	0.867534
	0.166834	0.867534	2.93627	0.800801	1.26793	0.700701	1.001	2.43577	4.004	5.13847	6.53987	6.30631	3.16984	3.003	2.53587	2.002	1.8018	1.2012	0.900901	1.001	0.633967	0.767434	0.934268	1.26793	0.767434	0.800801	0.767434	0.734067	0.734067	1.6016	1.33467	1.33467	1.1011	0.967634	0.867534	1.13447	1.1011	1.3013	2.56924	1.46813	1.06773	1.06773	0.667334	1.1011	1.26793	1.13447	0.600601	0.834168	0.967634
	2.23557	6.20621	5.37204	12.2122	17.4174	50.0501	48.315	32.666	34.4011	31.1645	57.0237	30.0634	23.9573	35.302	62.8962	42.9763	13.8472	9.87654	6.43977	3.06974	4.5045	5.60561	1.53487	4.87154	1.73507	1.73507	1.3013	0.633967	1.06773	0.867534	0.800801	0.500501	0.467134	1.3013	1.83517	1.16783	1.4014	0.500501	0.133467	0.266934	1.6016	0.767434	0.667334	0.233567	0.133467	0.1001	0.166834	0.500501	0.934268
	1.13447	1.3013	2.93627	13.7471	10.5772	15.4488	13.4468	13.9806	14.6813	13.2799	7.54087	5.80581	5.17184	5.63897	3.57024	6.43977	8.14147	4.53787	7.54087	4.47114	4.07074	8.27494	4.33767	3.03637	2.1021	3.2032	2.66934	2.56924	1.93527	1.4014	1.73507	1.6016	2.002	2.53587	1.7017	1.9019	1.93527	3.5035	4.57124	2.23557	2.9029	2.03537	1.83517	1.8018	1.43477	2.43577	3.37004	2.002	1.66834
	0.500501	3.06974	11.8452	8.40841	11.4114	15.5489	24.8916	23.023	8.34168	10.5439	14.2476	18.9857	7.34067	4.47114	6.94027	10.8108	18.018	11.0444	3.43677	4.13747	2.36904	2.6026	2.76944	1.93527	3.43677	6.30631	3.1031	1.7017	1.2012	2.3023	1.4014	2.26894	2.76944	1.06773	1.26793	1.26793	0.934268	1.23457	1.46813	0.967634	0.967634	1.06773	0.967634	2.002	1.76844	1.13447	0.667334	0.734067	1.76844
	0.467134	2.2022	1.7017	2.33567	1.53487	4.03737	10.9109	6.47314	2.8028	3.2032	2.6026	2.13547	1.06773	1.06773	0.367034	0.266934	0.467134	0.667334	0.633967	0.800801	1.8018	0.967634	1.06773	0.900901	0.500501	1.26793	1.83517	5.97264	5.60561	3.26994	4.13747	1.46813	1.46813	1.1011	0.500501	0.834168	0.567234	0.4004	1.16783	0.934268	0.633967	1.2012	0.700701	0.233567	0.567234	0.667334	0.667334	0.700701	1.76844
	2.1021	10.0767	16.0494	12.7461	21.021	13.2132	33.5669	20.3203	12.6126	19.0858	20.7207	16.8836	11.8118	15.8492	14.2142	32.666	9.67634	13.6803	15.1151	19.653	11.7117	3.53687	3.003	3.26994	2.1021	2.1021	4.13747	3.1031	3.13647	2.1021	1.73507	2.63597	3.63697	1.9019	1.36803	1.46813	1.76844	1.36803	1.83517	1.66834	1.26793	2.03537	1.43477	1.63497	2.06874	2.06874	2.46914	4.13747	4.67134
	0.800801	3.83717	2.2022	3.1031	4.03737	3.003	3.16984	4.9049	4.47114	4.27094	2.3023	2.33567	3.1031	3.67034	5.63897	2.9029	12.4124	17.0504	8.94228	2.002	1.23457	0.500501	0.166834	1.06773	0.266934	0.667334	0.533867	0.667334	0.500501	0.4004	1.23457	0.900901	0.3003	0.4004	0.667334	0.834168	0.266934	0.2002	0.4004	0.333667	0.367034	0.3003	0.2002	0.2002	0.367034	0.2002	0.3003	0.433767	0.433767
	0.900901	6.77344	11.8118	15.8825	10.644	9.74308	13.9473	18.5185	13.8472	12.012	15.9826	13.9806	10.377	12.4124	13.7471	10.1101	6.84017	5.27194	4.37104	4.03737	6.07274	5.67234	4.57124	2.83617	2.2022	3.5035	2.3023	3.13647	2.63597	4.23757	1.63497	3.5035	3.63697	0.734067	1.1011	1.46813	1.06773	1.6016	3.03637	4.03737	3.5035	4.3043	3.16984	6.87354	5.77244	2.2022	1.6016	1.1011	5.43877
	0.4004	1.83517	1.73507	2.33567	4.07074	4.17084	1.43477	1.3013	0.867534	0.633967	0.633967	0.233567	0.133467	1.23457	1.7017	2.06874	0.734067	1.16783	1.13447	1.33467	0.633967	0.734067	0.700701	0.3003	0.900901	0.633967	0.367034	0.233567	0.3003	0.367034	0.266934	0.367034	0.233567	0.467134	0.2002	0.4004	0.266934	0.333667	0.2002	0.333667	0.367034	0.333667	0.2002	0.2002	0.600601	0.4004	0.333667	0.2002	0.367034
	5.30531	19.2192	29.6964	17.2506	8.47514	11.5782	11.5115	13.8472	12.5459	7.57424	7.70771	10.7107	8.57524	5.70571	7.00701	4.8048	5.83917	3.67034	3.97064	4.37104	4.07074	3.53687	2.9029	2.76944	4.3043	4.17084	4.23757	3.8038	3.57024	4.93827	4.77144	4.03737	4.5045	4.53787	4.27094	15.4821	7.24057	3.93727	4.83817	4.3043	4.13747	3.43677	3.93727	4.004	3.3033	3.4034	3.3033	2.5025	5.87254
	1.66834	6.30631	5.33867	8.87554	15.4488	12.7127	12.3457	14.7147	12.4458	9.87654	19.6196	18.6186	22.0554	15.0484	8.97564	25.1251	142.142	76.8435	15.7157	12.2122	4.63797	8.24157	3.003	3.83717	1.76844	0.834168	0.900901	0.967634	1.001	1.001	1.26793	1.001	1.76844	1.2012	0.667334	0.967634	0.600601	0.767434	0.567234	0.567234	0.500501	0.600601	0.500501	0.433767	0.867534	1.36803	1.06773	0.600601	1.8018
Mean	2.046	6.614	10.77	15.9	20.46	23.69	22.33	18.85	15.42	13.96	16.78	12.47	10.48	9.202	8.756	8.511	9.994	10.55	7.727	5.309	4.357	4.131	3.721	3.474	2.763	2.717	2.427	2.196	2.254	2.012	1.955	2.107	1.868	1.832	1.899	2.13	1.825	1.727	2.198	1.693	2.023	1.807	1.542	1.592	1.705	1.615	1.604	1.824	2.206
SEM	0.363	1.143	1.31	2.891	3.73	5.127	3.168	2.637	1.53	1.478	2.272	1.339	1.311	1.396	1.615	1.386	3.06	2.517	1.308	0.7915	0.6868	0.4426	0.4837	0.8506	0.3587	0.3584	0.3	0.248	0.25	0.1645	0.1752	0.2143	0.1679	0.2403	0.16	0.3363	0.2356	0.1867	0.3554	0.1843	0.3119	0.2289	0.1664	0.1993	0.1978	0.1637	0.1676	0.2289	0.3265
1Q	0.8008	3.103	4.538	6.573	6.073	6.707	7.541	7.541	7.574	7.574	7.241	5.572	4.037	3.27	3.437	3.237	3.237	2.769	2.603	2.002	1.835	1.335	1.535	1.602	1.335	1.368	1.134	0.9676	1.068	1.168	1.235	1.134	0.9343	1.068	1.101	1.101	0.8675	0.7674	0.9009	0.9343	0.8008	0.9009	0.7007	0.8008	0.9343	0.9009	0.8008	0.7007	1.034
Median	1.602	4.972	8.075	9.91	13.31	12.85	14.58	15.98	12.68	12.01	11.78	9.009	8.542	6.206	4.972	5.506	5.072	4.304	4.638	4.037	3.403	3.504	2.769	2.603	2.102	2.002	1.835	1.802	1.869	1.835	1.535	1.668	1.668	1.435	1.702	1.468	1.401	1.401	1.535	1.368	1.268	1.368	1.335	1.268	1.335	1.335	1.235	1.268	1.502
3Q	2.236	6.773	15.52	17.42	19.05	20.25	30.6	24.92	20.59	17.62	19.62	18.92	13.08	11.64	11.18	10.14	9.676	12.28	8.942	6.406	4.738	6.139	4.571	3.77	3.437	3.17	2.87	3.103	3.07	2.736	2.436	2.636	2.769	1.969	2.402	2.503	2.236	2.302	2.569	2.102	2.102	2.135	1.835	1.802	2.069	2.202	2.202	2.402	2.069
[truncated: 57 more columns]
