# Supplementary material for: Suppressed prefrontal neuronal firing variability and impaired social representation in IRSp53-mutant mice
Source: eLife. 2022 Nov 1;11:e74998. doi: 10.7554/eLife.74998 (PMC9662818; doi:10.7554/eLife.74998)
Supplement: Figure 2—source data 1. — The excel file contains the numerical data used to generate Figure 2A–E. [file elife-74998-fig2-data1.xlsx]

## Sheet: Fig 2
	Figure 2A							Figure 2B					Figure 2C	Total		Figure 2D	pExc		Figure 2E	pInh
	WT			KO				WT pExc	KO pExc	WT pInh	KO p Inh		WT	KO		WT	KO		WT	KO
	Peak to valley ratio	Half valley width	Firing rate (Hz)	Peak to valley ratio	Half valley width	Firing rate (Hz)		0.0755533	0.0638496	0.12188	0.119105		0.5	0.396667		0.5	0.396667		0.163333	14.74
	2.05761	332.75	0.5	2.40213	393.25	0.396667		0.105394	0.0868264	0.163513	0.151501		1.13333	3.3		1.13333	3.3		21.7833	40.0033
	1.83803	363	1.13333	2.22611	393.25	3.3		0.12904	0.101694	0.191029	0.169274		19.4867	1.2		19.4867	1.2		11.6833	66.06
	2.42864	393.25	19.4867	1.80511	302.5	1.2		0.18811	0.157188	0.235187	0.21215		0.356667	1.13333		0.356667	1.13333		18.15	18.5233
	1.63682	332.75	0.356667	2.02233	363	1.13333		0.3378	0.314394	0.357385	0.344277		1.19	0.383333		1.19	0.383333		30.81	10.12
	1.98833	302.5	1.19	2.80274	393.25	0.383333		0.586938	0.579279	0.588	0.587866		17.13	1.61333		17.13	1.61333		17.1533	5.45667
	2.28906	363	17.13	2.82221	332.75	1.61333		0.854632	0.858699	0.857726	0.862196		1.26333	0.423333		1.26333	0.423333		34.4767	10.04
	2.45021	453.75	1.26333	2.64036	363	0.423333		1	1	1	1		2.8	0.65		2.8	0.65		12.3433	2.04333
	1.91658	302.5	2.8	1.96831	272.25	0.65		0.918962	0.900655	0.854686	0.855284		1.92	0.116667		1.92	0.116667		0.09	6.07333
	2.14102	423.5	1.92	2.33836	423.5	0.116667		0.626416	0.591428	0.403259	0.422912		2.92667	0.0233333		2.92667	0.0233333		39.2	9.62667
	2.42642	363	2.92667	2.76063	363	0.0233333		0.245012	0.210993	-0.193814	-0.143936		0.433333	0.31		4.48667	0.31		34.9133	6.23667
	1.80416	181.5	0.433333	1.92352	272.25	0.31		-0.0859962	-0.0993093	-0.705823	-0.639194		4.48667	0.47		0.16	0.47		24.5467	16.24
	2.63806	332.75	4.48667	2.299	363	0.47		-0.295782	-0.280782	-0.981554	-0.930907		0.16	1.42333		0.253333	1.42333		13.38	18.4767
	2.54456	423.5	0.16	2.06585	363	1.42333		-0.396789	-0.360646	-1.0139	-1.00971		0.253333	10.7233		5.05667	10.7233		2.87333	0.816667
	2.03969	332.75	0.253333	2.0853	423.5	10.7233		-0.439294	-0.395502	-0.894436	-0.945939		5.05667	2.08333		0.153333	2.08333		18.08	0.63
	1.97649	393.25	5.05667	1.85252	393.25	2.08333		-0.460462	-0.418687	-0.724027	-0.816513		0.153333	0.0733333		1.30667	0.0733333		0.513333	0.63
	1.98519	393.25	0.153333	1.65734	363	0.0733333		-0.4687	-0.431185	-0.557819	-0.665239		1.30667	1.12667		4.37667	1.12667		9.72667	16.7967
	2.35041	211.75	1.30667	1.64658	363	1.12667		-0.459632	-0.424436	-0.408631	-0.508669		4.37667	0.293333		1.56	0.293333			0.33
	1.62727	363	4.37667	2.14648	393.25	0.293333		-0.434523	-0.400135	-0.276557	-0.357517		1.56	0.106667		0.983333	0.106667			57.0033
	2.27104	423.5	1.56	1.57555	242	0.106667		-0.402534	-0.369445	-0.166073	-0.224967		0.983333	0.516667		7.41667	0.516667			13.2533
	2.41806	393.25	0.983333	2.39004	393.25	0.516667		-0.372005	-0.341396	-0.0825874	-0.12038		7.41667	14.74		15.1667	8.11667			1.61
	2.88889	363	7.41667	0.822398	121	14.74		-0.344824	-0.317098	-0.0247147	-0.0435734		15.1667	8.11667		0.44	0.706667			0.68
	2.80851	363	15.1667	2.26185	393.25	8.11667		-0.318663	-0.293431	0.0147799	0.0119893		0.44	0.706667		0.133333	5.36667			1.69333
	1.58089	242	0.44	2.00883	423.5	0.706667		-0.291543	-0.268414	0.0426473	0.0525284		0.133333	5.36667		0.0366667	0.0233333			24.6867
	2.34665	302.5	0.133333	2.23526	332.75	5.36667		-0.263319	-0.242388	0.0622468	0.0813374		0.0366667	0.0233333		0.18	6.33
	1.93252	423.5	0.0366667	1.97057	393.25	0.0233333		-0.234569	-0.216383	0.075189	0.100251		0.18	6.33		2.12333	1.08
	2.11035	393.25	0.18	3.96253	847	6.33		-0.205521	-0.19079	0.0829373	0.111078		5.03	1.08		2.86667	6.04667
	1.65169	181.5	5.03	1.76628	363	1.08		-0.17599	-0.165289	0.0868917	0.115729		2.12333	40.0033		0.16	3.51667
	2.70574	363	2.12333	0.916669	121	40.0033		-0.145881	-0.139473	0.0881644	0.115848		2.86667	66.06		0.78	3.11333
	2.36469	363	2.86667	0.751143	151.25	66.06		-0.115537	-0.113341	0.0874129	0.112587		0.16	6.04667		0.04	2.79
	1.72921	332.75	0.16	2.79338	423.5	6.04667		-0.0856979	-0.0873667	0.0848164	0.106729		0.78	3.51667		0.14	0.41
	2.15547	363	0.78	3.70007	453.75	3.51667		-0.057266	-0.062315	0.080209	0.0989309		0.04	3.11333		0.0166667	11.7733
	2.05972	393.25	0.04	1.97552	393.25	3.11333							0.14	2.79		13.0467	3.27667
	1.93024	363	0.14	2.17841	423.5	2.79							0.0166667	0.41		0.69	1.55667
	2.37718	423.5	0.0166667	2.62559	393.25	0.41							13.0467	18.5233		0.0933333	0.396667
	2.97733	393.25	13.0467	1.07001	181.5	18.5233							0.69	11.7733		0.333333	0.3
	2.03105	332.75	0.69	2.39938	393.25	11.7733							0.0933333	3.27667		0.89	7.95333
	2.33997	363	0.0933333	2.45883	393.25	3.27667							0.333333	1.55667		1.94667	0.44
	2.76613	453.75	0.333333	3.93367	605	1.55667							0.163333	0.396667		0.746667	0.293333
	1.21399	90.75	0.163333	1.93617	272.25	0.396667							0.89	0.3		2.13333	0.29
	2.87654	363	0.89	2.17528	453.75	0.3							1.94667	7.95333		2.04333	0.18
	1.77182	242	1.94667	3.12626	393.25	7.95333							0.746667	0.44		0.09	2.91667
	1.73927	393.25	0.746667	2.02657	302.5	0.44							21.7833	10.12		0.19	5.11
	0.915019	151.25	21.7833	0.819993	181.5	10.12							2.13333	0.293333		1.69333	2.34333
	2.34838	242	2.13333	2.17602	272.25	0.293333							2.04333	0.29		4.45333	0.146667
	2.2288	423.5	2.04333	2.14494	332.75	0.29							0.09	0.18		0.103333	0.46
	1.96837	423.5	0.09	2.0941	272.25	0.18							11.6833	2.91667		0.173333	2.88333
	0.717728	151.25	11.6833	2.54354	393.25	2.91667							18.15	5.11		5.91667	3.34
	0.909202	151.25	18.15	2.76688	332.75	5.11							0.19	2.34333		14.3667	4.37
	2.40202	393.25	0.19	1.97655	302.5	2.34333							1.69333	0.146667		0.14	3.16667
	2.16623	393.25	1.69333	2.07497	423.5	0.146667							4.45333	0.46		2.60333	5.18
	2.03686	363	4.45333	1.79521	211.75	0.46							0.103333	2.88333		0.206667	3.72333
	2.32536	393.25	0.103333	2.2977	453.75	2.88333							0.173333	3.34		5.78333	0.433333
	2.23642	363	0.173333	2.33396	393.25	3.34							5.91667	4.37		6.71667	1.86333
	1.94703	302.5	5.91667	2.05944	272.25	4.37							14.3667	3.16667		0.373333	7.83
	2.07189	363	14.3667	2.77154	302.5	3.16667							0.14	0.376667		0.243333	0.703333
	2.10933	332.75	0.14	1.68528	151.25	0.376667							2.60333	5.18		0	0.153333
	2.30485	393.25	2.60333	2.35533	423.5	5.18							0.206667	3.72333		0.606667	5.91
	1.42913	211.75	0.206667	2.41562	363	3.72333							5.78333	0.433333		0.03	0.39
	2.52401	363	5.78333	1.67069	272.25	0.433333							6.71667	1.86333		0	1.23667
	2.92771	363	6.71667	2.56207	393.25	1.86333							0.373333	7.83		0.31	0.84
	2.29472	393.25	0.373333	2.1762	453.75	7.83							0.243333	0.703333		0.0366667	1.74333
	2.08249	363	0.243333	2.08837	423.5	0.703333							0	0.153333		0.66	2.01667
	2.2493	332.75	0	2.04662	272.25	0.153333							0.606667	5.91		5.47667	1.46333
	2.25664	302.5	0.606667	3.26334	393.25	5.91							0.03	0.39		0.53	5.61667
	2.41508	453.75	0.03	1.57636	363	0.39							0	1.23667		0.203333	1.06667
	1.92871	302.5	0	2.21707	302.5	1.23667							0.31	0.84		1.12	0.666667
	1.50114	242	0.31	2.27989	393.25	0.84							0.0366667	1.74333		0.17	0.33
	1.81335	302.5	0.0366667	2.74882	302.5	1.74333							0.66	2.01667		0.22	0.106667
	2.0986	242	0.66	2.98516	393.25	2.01667							5.47667	1.46333		0.456667	2.99
	2.74859	393.25	5.47667	2.66088	484	1.46333							0.53	5.61667		0.00333333	0.743333
	2.27966	363	0.53	2.03686	272.25	5.61667							0.203333	1.06667		0.0133333	0.37
	1.83063	332.75	0.203333	2.07388	393.25	1.06667							1.12	0.666667		3.63667	0.523333
	2.3859	393.25	1.12	2.06717	363	0.666667							0.17	0.33		5.09667	0
	1.93151	332.75	0.17	2.64168	514.25	0.33							0.22	0.106667		4.33333	1.47667
	1.83872	363	0.22	2.1524	302.5	0.106667							0.456667	2.99		1.69667	1.54667
	2.13485	393.25	0.456667	3.30045	272.25	2.99							0.00333333	0.743333		5.40667	12.1667
	1.6756	272.25	0.00333333	2.46962	393.25	0.743333							0.0133333	0.37		8.78333	1.77
	1.99371	363	0.0133333	1.93702	302.5	0.37							3.63667	0.523333		5.29	0.383333
	2.52689	332.75	3.63667	2.49601	363	0.523333							5.09667	0		1.19333	2.11
	2.28891	453.75	5.09667	1.65429	302.5	0							30.81	5.45667		1.78	0.166667
	0.829047	121	30.81	0.752967	121	5.45667							4.33333	1.47667		8.15333	0.563333
	2.71722	423.5	4.33333	1.74504	272.25	1.47667							1.69667	1.54667		4.44667	0.22
	2.26492	423.5	1.69667	1.6746	302.5	1.54667							5.40667	12.1667		4.94	0.796667
	1.51141	363	5.40667	1.96006	393.25	12.1667							8.78333	1.77		0.836667	4.09333
	2.2302	393.25	8.78333	2.08035	363	1.77							5.29	0.383333		0.06	0.11
	1.90076	363	5.29	2.68226	484	0.383333							1.19333	2.11		2.08333	2.61667
	1.821	302.5	1.19333	2.29575	514.25	2.11							1.78	0.166667		0.716667	6.14333
	1.71263	242	1.78	2.4814	484	0.166667							8.15333	0.563333		4.68	0.05
	1.59311	393.25	8.15333	1.82524	332.75	0.563333							4.44667	0.22		1.54667	11.0433
	2.12537	393.25	4.44667	3.66342	423.5	0.22							4.94	0.796667		7.73667	0.773333
	2.14787	453.75	4.94	2.31979	393.25	0.796667							0.836667	4.09333		0.63	0.393333
	1.98322	272.25	0.836667	2.8997	332.75	4.09333							0.06	0.11		4.92333	0.136667
	2.0619	363	0.06	2.35702	272.25	0.11							2.08333	2.61667		1.72667	2.36
	2.24292	393.25	2.08333	2.62458	453.75	2.61667							0.716667	6.14333		0.466667	0.51
	2.1102	332.75	0.716667	2.20266	302.5	6.14333							4.68	0.05		1.42	1.51333
	2.19038	423.5	4.68	2.10033	363	0.05							1.54667	10.04		1.92333	7.16333
	1.89858	393.25	1.54667	0.725647	151.25	10.04							7.73667	1.32333		0.383333	3.37333
	1.74401	393.25	7.73667	1.10159	302.5	1.32333							0.63	11.0433		4.58667	0.553333
	2.23982	363	0.63	1.84003	423.5	11.0433							4.92333	0.773333		0.0533333	0.156667
	2.93857	363	4.92333	2.17325	453.75	0.773333		-0.057266	-0.062315	0.080209	0.0989309		1.72667	0.393333		0.65	1.15667
	2.0498	393.25	1.72667	2.59796	332.75	0.393333							17.1533	0.136667		0.0966667	8.46333
	0.817515	90.75	17.1533	2.08396	423.5	0.136667							34.4767	2.36		0.04	3.20667
	0.84526	151.25	34.4767	3.41105	332.75	2.36							0.466667	0.51		0.08	1.76
	1.68211	363	0.466667	2.66889	272.25	0.51							6.12	2.04333		2.12	11.4433
	2.09065	393.25	6.12	1.21131	151.25	2.04333							1.57333	1.51333		3.82333	0.896667
	2.00318	393.25	1.57333	2.6902	363	1.51333							0.03	7.16333		0.676667	1.54
	1.90844	332.75	0.03	1.91051	272.25	7.16333							3.19333	3.37333		2.50667	0.56
	1.93818	363	3.19333	3.54067	363	3.37333							0.236667	0.553333		0.0566667	0.0766667
	1.80718	363	0.236667	2.15389	332.75	0.553333							0.4	0.156667		1.46	0.256667
	1.87263	363	0.4	2.99049	484	0.156667							0.506667	1.15667		6.12	2.35
	2.60305	393.25	0.506667	2.47429	393.25	1.15667							0.266667	8.46333		1.57333	0.126667
	2.24644	393.25	0.266667	2.42474	453.75	8.46333							6.63	3.20667		0.03	8.03667
	2.55596	423.5	6.63	3.17165	363	3.20667							0.356667	1.76		3.19333	3.97333
	1.22005	272.25	0.356667	2.51132	332.75	1.76							0.24	11.4433		0.236667	0.556667
	2.11539	423.5	0.24	2.74036	423.5	11.4433							0.11	0.896667		0.4	1.73
	2.53619	332.75	0.11	1.88929	393.25	0.896667							0.0366667	6.07333		0.506667	0.346667
	2.14246	332.75	0.0366667	0.835549	151.25	6.07333							1.10333	1.54		0.266667	0.646667
	2.10474	393.25	1.10333	2.64161	393.25	1.54							3.32	0.56		0.14	3.75667
	1.68665	211.75	3.32	1.81158	332.75	0.56							34.9133	0.0766667		3.18333	0.23
	0.870283	181.5	34.9133	3.04962	544.5	0.0766667							16.4533	0.256667		0.0966667	1.27
	2.11261	332.75	16.4533	2.25299	363	0.256667							0.0466667	2.35		0.193333	1.01
	2.19217	363	0.0466667	2.76785	363	2.35							0.03	0.126667		0.35	5.19667
	1.69144	302.5	0.03	2.3964	393.25	0.126667							1.92333	8.03667		0.26	7.63
	1.84822	242	1.92333	1.68867	242	8.03667							1.30667	3.97333		0.573333	0.05
	2.36769	484	1.30667	1.86248	211.75	3.97333							0.586667	9.62667		2.08333	0.4
	2.34212	423.5	0.586667	1.04012	181.5	9.62667							1.26667	0.556667		0.336667	2.73333
	2.7852	211.75	1.26667	1.68169	363	0.556667							3.17	1.73		0.0666667	6.13333
	2.25488	423.5	3.17	2.39384	393.25	1.73							24.5467	0.346667		0.67	10.9967
	0.871304	121	24.5467	1.80633	332.75	0.346667							3.00333	0.646667		0.303333	2.10333
	2.05297	302.5	3.00333	2.80342	393.25	0.646667							11.9633	3.75667		7.33667	0.813333
	2.71852	484	11.9633	2.23176	393.25	3.75667							12.4467	4.25667		0.08	2.75
	2.80418	363	12.4467	1.25959	211.75	4.25667							2.49667	0.23		1.59333	7.71
	2.57196	423.5	2.49667	2.2258	484	0.23							6.77	6.23667		0.01	2.43333
	1.77026	302.5	6.77	1.06872	151.25	6.23667							0.133333	0.03		0.166667	0.55
	1.98193	302.5	0.133333	1.65732	181.5	0.03							0.0233333	1.27		4.07333	0.0666667
	1.40702	181.5	0.0233333	2.40827	302.5	1.27							0.426667	1.01		3.13	1.51667
	1.74553	302.5	0.426667	2.61302	363	1.01							0.366667	16.24		1.45333	1.72667
	1.84509	393.25	0.366667	0.995017	121	16.24							0.793333	2.72333		0.02	3.07667
	1.93027	363	0.793333	1.63708	181.5	2.72333							0.77	5.19667		0.12	0.263333
	1.49339	272.25	0.77	2.3822	423.5	5.19667							0.07	7.63		6.63	0.623333
	1.59773	363	0.07	2.32564	393.25	7.63							0.0933333	0.05		0.24	0.576667
	1.50326	393.25	0.0933333	2.44515	453.75	0.05							13.38	0.4		0.11	0.0333333
	1.11226	151.25	13.38	1.83876	272.25	0.4							0.89	2.73333		0.0366667	8.58667
	2.22689	363	0.89	2.76509	393.25	2.73333							0.456667	6.13333		1.10333	2.1
	3.04859	453.75	0.456667	2.45541	302.5	6.13333							0.42	10.9967		3.32	9.25333
	1.93561	332.75	0.42	3.35017	332.75	10.9967							2.87333	2.10333		0.25	0.0966667
	1.00954	121	2.87333	2.27382	453.75	2.10333							0.226667	0.813333		0.0633333	0.34
	1.81285	242	0.226667	2.48454	393.25	0.813333							0.453333	2.75		0.166667	0.7
	1.80852	363	0.453333	2.24238	453.75	2.75							0.0966667	7.71		0.506667	0.303333
	2.18623	302.5	0.0966667	2.37046	332.75	7.71							0.386667	2.43333		1.39667	1.4
	1.97951	332.75	0.386667	2.85184	332.75	2.43333							5.71	0.55		0.806667	0.543333
	2.13444	393.25	5.71	2.88429	302.5	0.55							4.66333	0.0666667		0.0733333	0.193333
	1.8516	363	4.66333	1.8015	272.25	0.0666667							0.686667	0.346667		0.0266667	3.87
	1.90491	272.25	0.686667	1.17345	211.75	0.346667							2.52	1.51667		0.183333	0.16
	2.49612	363	2.52	2.31368	302.5	1.51667							0.0766667	1.72667		2.19333	1.95
	1.9963	423.5	0.0766667	2.64085	393.25	1.72667							0.566667	3.07667		4.65	4.82333
	1.73244	363	0.566667	2.58381	363	3.07667							1.42	0.263333		20.8133	0.05
	1.81874	423.5	1.42	1.88042	332.75	0.263333							1.92333	0.623333		0.0166667	0.623333
	2.19988	423.5	1.92333	2.13485	423.5	0.623333							0.383333	0.576667		0.17	6.31667
	1.58645	332.75	0.383333	2.9711	211.75	0.576667							12.3433	0.0333333		0.136667	1.85
	0.974178	121	12.3433	2.29858	302.5	0.0333333							4.58667	8.58667		3.61667	5.09333
	2.42462	393.25	4.58667	1.75527	211.75	8.58667							0.0533333	2.1		3.58667	0.0333333
	1.87671	393.25	0.0533333	2.63325	242	2.1							0.65	18.4767		1.02	0.27
	1.62218	302.5	0.65	0.841061	151.25	18.4767							0.0966667	9.25333		3.93	0.0866667
	1.54977	332.75	0.0966667	2.13072	363	9.25333							0.04	0.0966667		0.986667	0.61
	1.92578	332.75	0.04	2.69259	423.5	0.0966667							0.08	0.34		16.4533	0.96
	1.88655	363	0.08	2.29886	484	0.34							2.12	0.7		0.0466667	0.623333
	2.34479	423.5	2.12	1.87421	453.75	0.7							3.82333	0.303333		0.03	0.16
	2.63459	393.25	3.82333	2.1084	453.75	0.303333							0.676667	1.4		1.92333	5.72667
	2.22457	423.5	0.676667	2.01133	332.75	1.4							2.50667	0.543333		1.30667	2.71333
	2.04601	423.5	2.50667	2.8808	332.75	0.543333							0.0566667	0.193333		0.586667	1.85667
	1.88242	363	0.0566667	3.02231	332.75	0.193333							1.46	0.816667		1.16667	0.99
	2.00301	393.25	1.46	0.848507	181.5	0.816667							0.14	3.87		1.89667	1.22667
	1.97362	332.75	0.14	1.79596	211.75	3.87							3.18333	0.16		9.64	1.37
	2.47705	393.25	3.18333	1.85502	242	0.16							0.0966667	1.95		0.13	6.77
	1.69626	272.25	0.0966667	2.44032	393.25	1.95							0.193333	0.46		2.55667	0.04
	2.68074	423.5	0.193333	1.13088	211.75	0.46							0.35	4.82333		0.92	1.88
	1.97103	332.75	0.35	2.42975	423.5	4.82333							0.26	0.63		0.92	0.0133333
	2.08927	242	0.26	1.21193	181.5	0.63							0.573333	0.05		1.26667	0.0933333
	1.80632	393.25	0.573333	2.15023	272.25	0.05							2.08333	0.623333		3.17	0.856667
	2.09742	393.25	2.08333	2.29333	423.5	0.623333							0.336667	0.63		3.00333	4.51
	2.16781	242	0.336667	1.05095	181.5	0.63							0.0666667	6.31667		11.9633	0.03
	2.40178	211.75	0.0666667	2.43876	393.25	6.31667							0.67	1.85		12.4467	13.75
	1.94957	363	0.67	3.11193	302.5	1.85							0.303333	5.09333		2.49667	0.0233333
	2.14904	332.75	0.303333	1.69611	423.5	5.09333							7.33667	0.0333333		6.77	0.51
	2.175	423.5	7.33667	2.83169	484	0.0333333							0.08	0.27		0.133333	1.10667
	2.26146	363	0.08	2.02673	453.75	0.27							1.59333	0.0866667		0.426667	3.16667
	2.41526	363	1.59333	2.4349	393.25	0.0866667							0.01	0.61		0.366667	5.91333
	1.71896	211.75	0.01	2.00519	423.5	0.61							0.166667	0.96		0.793333	0.673333
	2.64102	211.75	0.166667	2.11207	332.75	0.96							4.07333	0.623333		2.16333	1.89
	2.13899	332.75	4.07333	3.13892	302.5	0.623333							0.09	0.06		3.5	0.99
	1.23165	151.25	0.09	1.39207	242	0.06							3.13	0.16		0.77	0.153333
	1.85688	332.75	3.13	2.30938	272.25	0.16							1.45333	5.72667		0.07	0.616667
	2.14253	393.25	1.45333	1.74188	211.75	5.72667							0.02	2.71333		0.0933333	0.446667
	1.69235	332.75	0.02	2.7628	332.75	2.71333							0.12	1.85667		0.89	1.91
	2.26972	423.5	0.12	2.04176	453.75	1.85667							0.25	16.7967		0.0266667	0.39
	2.2196	242	0.25	1.2027	90.75	16.7967							0.0633333	0.33		5.97667	0.166667
	2.58066	332.75	0.0633333	0.839571	151.25	0.33							0.166667	0.99		0.16	0.453333
	2.23314	363	0.166667	2.82528	423.5	0.99							0.506667	1.22667		0.85	0.02
	2.15427	423.5	0.506667	2.52561	484	1.22667							1.39667	1.37		1.39	0.56
	2.06603	211.75	1.39667	2.14606	332.75	1.37							0.806667	6.77		0.726667	0.226667
	2.02049	363	0.806667	2.1891	363	6.77							0.0733333	0.04		0.456667	0.383333
	1.58357	302.5	0.0733333	2.55175	393.25	0.04							0.0266667	1.88		0.42	2.63333
	1.89057	332.75	0.0266667	2.37094	393.25	1.88							0.183333	0.0133333		0.226667	6.94667
	2.6373	393.25	0.183333	1.72579	211.75	0.0133333							2.19333	0.0933333		0.453333	0.0766667
	2.3812	423.5	2.19333	2.35299	272.25	0.0933333							4.65	0.856667		0.0966667	0.32
	1.97073	242	4.65	2.24196	332.75	0.856667							20.8133	0.473333		0.386667	0.23
	2.77608	393.25	20.8133	1.12893	211.75	0.473333							0.0166667	4.51		5.71	0.403333
	1.6382	272.25	0.0166667	2.55589	423.5	4.51							0.17	0.03		4.66333	1.35333
	1.76677	302.5	0.17	2.39284	423.5	0.03							0.136667	13.75		0.686667	0.00666667
	1.72313	211.75	0.136667	2.47773	393.25	13.75							3.61667	0.0233333		2.52	3.04667
	2.22233	423.5	3.61667	2.03433	332.75	0.0233333							3.58667	0.51		0.0766667	0.19
	1.99792	453.75	3.58667	2.15911	332.75	0.51							1.02	1.10667		0.566667	0.57
	2.72833	393.25	1.02	1.86583	393.25	1.10667							3.93	57.0033		0.11	2.32
	2.06743	423.5	3.93	0.772288	121	57.0033							0.986667	3.16667		1.08667	9.21667
	1.91575	272.25	0.986667	2.0683	272.25	3.16667							39.2	5.91333		0.276667	0.57
	0.905958	121	39.2	2.5264	423.5	5.91333							1.16667	0.673333		0.18	0.713333
	2.84986	363	1.16667	2.57548	393.25	0.673333							1.89667	1.89		0.17	0.493333
	2.49449	363	1.89667	2.71356	363	1.89							9.64	0.99		0.13	0.19
	1.99244	332.75	9.64	2.13976	393.25	0.99							0.13	0.153333		0.0166667	0.483333
	2.86142	332.75	0.13	3.45083	423.5	0.153333							2.55667	0.616667		0.136667	0.03
	2.7821	423.5	2.55667	1.74311	332.75	0.616667							0.92	0.446667		1.23333	3.89667
	1.71406	302.5	0.92	2.12435	484	0.446667							0.92	1.91		0.303333	0.803333
	1.71406	302.5	0.92	2.12579	423.5	1.91							2.16333	0.39		0.0466667	1.17
	2.65129	332.75	2.16333	2.07435	423.5	0.39							3.5	0.166667		0.383333	0.146667
	2.3288	453.75	3.5	2.00711	332.75	0.166667							0.0266667	0.453333		5.51333	3.92667
	1.64311	272.25	0.0266667	2.44433	423.5	0.453333							5.97667	0.02		1.36	3.14667
	2.11565	332.75	5.97667	2.07699	393.25	0.02							0.16	0.56		0.3	0.143333
	1.83702	211.75	0.16	2.32518	332.75	0.56							0.85	13.2533		3.38333	6.3
	2.55946	453.75	0.85	0.898181	151.25	13.2533							1.39	0.226667		0.543333	6.37
	2.4557	332.75	1.39	2.50883	302.5	0.226667							0.726667	0.383333		2.64	1.76
	3.06957	544.5	0.726667	3.09004	393.25	0.383333							0.11	2.63333		7.72667	1.22
	2.04058	332.75	0.11	2.17189	363	2.63333							1.08667	6.94667		0.116667	3.58333
	2.00476	302.5	1.08667	2.08572	393.25	6.94667							0.276667	0.0766667		0.88	15.1833
	1.81833	242	0.276667	1.89779	332.75	0.0766667							0.18	1.61		0.146667	0.153333
	2.06833	453.75	0.18	0.847816	121	1.61							0.17	0.32		0.116667	1.10333
	2.4303	302.5	0.17	2.04854	363	0.32							0.13	0.23		3.56667	24.14
	1.94705	272.25	0.13	2.75104	363	0.23							0.0166667	0.403333		0.26	3.34
	1.61862	363	0.0166667	2.06976	393.25	0.403333							0.136667	1.35333		0.106667	9.46667
	2.57171	363	0.136667	1.87973	363	1.35333							1.23333	0.00666667		0.29	10.08
	1.90716	393.25	1.23333	2.13205	423.5	0.00666667							0.303333	3.04667		0.626667	4.23333
	2.03403	393.25	0.303333	2.71266	363	3.04667							0.0466667	0.19		0.0966667	6.19333
	1.61091	332.75	0.0466667	1.79893	302.5	0.19							0.383333	0.57		0.0233333	12.9133
	1.80755	363	0.383333	2.48548	272.25	0.57							5.51333	2.32		0.216667	0.333333
	1.70445	393.25	5.51333	1.4732	272.25	2.32							1.36	9.21667		0.133333	1.34
	2.19468	393.25	1.36	2.04997	272.25	9.21667							0.3	0.57		2.22333	2.03333
	2.01538	363	0.3	1.968	393.25	0.57							3.38333	0.713333		2.47667	0.206667
	2.06473	363	3.38333	2.65654	393.25	0.713333							0.543333	0.493333		0.356667	3.87333
	2.36476	332.75	0.543333	2.72055	514.25	0.493333							2.64	0.19		0.0533333	0.706667
	2.34231	453.75	2.64	1.49449	272.25	0.19							7.72667	0.483333		1.81	1.63667
	1.96506	393.25	7.72667	2.26549	453.75	0.483333							2.47667	0.68		2.86667	3.25667
	1.91307	393.25	2.47667	1.00215	121	0.68							0.356667	0.03		3.22667	1.21
	2.31921	393.25	0.356667	2.57687	363	0.03							0.0533333	3.89667		1.94	2.33667
	1.48568	302.5	0.0533333	2.44238	453.75	3.89667							1.81	0.803333		1.16667	0.446667
	1.5943	363	1.81	1.87373	332.75	0.803333							2.86667	1.17		4.26	2.58
	2.01244	363	2.86667	1.94445	363	1.17							3.22667	0.146667		0.833333	0.33
	1.67903	423.5	3.22667	2.65389	423.5	0.146667							1.94	3.92667		4.84333	1.76667
	1.82981	393.25	1.94	1.89025	423.5	3.92667							1.16667	3.14667		0.986667	10.3967
	2.04045	393.25	1.16667	2.34002	423.5	3.14667							4.26	0.143333		0.41	1.69333
	1.83007	423.5	4.26	2.4649	393.25	0.143333							0.833333	6.3		0.0266667	2.3
	1.67619	332.75	0.833333	2.71121	302.5	6.3							4.84333	6.37		1.02	8.74
	1.89968	363	4.84333	2.58515	453.75	6.37							0.986667	1.76		9.53	6.48333
	2.33445	363	0.986667	1.4603	302.5	1.76							0.41	1.22		1.43	0.01
	1.45632	302.5	0.41	2.33898	242	1.22							0.0266667	3.58333		0.0133333	4.46
	1.81515	332.75	0.0266667	1.97435	423.5	3.58333							1.02	15.1833		2.62	9.78
	1.97305	423.5	1.02	1.97248	393.25	15.1833							7.78333	0.153333		0.18	5.33333
	1.35369	211.75	7.78333	2.41183	423.5	0.153333							9.53	1.10333		5.35667	7.76
	2.28526	423.5	9.53	2.30585	302.5	1.10333							0	24.14		0	14.7333
	2.47068	302.5	0	2.45334	423.5	24.14							0.376667	3.34		0.376667	0.0533333
	3.74882	574.75	0.376667	2.93439	453.75	3.34							1.45333	9.46667		1.45333	1.39667
	2.33318	453.75	1.45333	2.41939	363	9.46667							3.07667	10.08		3.07667	7.09333
	1.89404	363	3.07667	2.70351	423.5	10.08							4.00667	4.23333		4.00667	7.17333
	1.82479	393.25	4.00667	2.89802	363	4.23333							2.48667	6.19333		2.48667	1.28
	1.90865	363	2.48667	2.42492	363	6.19333							0.0933333	12.9133		0.0933333	7.2
	2.11919	393.25	0.0933333	1.98627	423.5	12.9133							0.17	0.333333		0.17	2.54
	1.77761	332.75	0.17	1.83537	393.25	0.333333							0.3	1.34		0.3	4.31667
	1.77685	393.25	0.3	2.04098	393.25	1.34							4.75667	2.03333		4.75667	0.983333
	2.49471	332.75	4.75667	2.15981	302.5	2.03333							4.55667	0.206667		4.55667	0.17
	2.00505	393.25	4.55667	1.72371	302.5	0.206667							0.233333	3.87333		0.74	1.6
	2.7331	423.5	0.233333	2.28751	423.5	3.87333							4.59	0.706667		1.31333	4.9
	1.84594	363	4.59	2.03458	363	0.706667							0.14	1.63667		0.0866667	0.0333333
	2.83426	393.25	0.14	2.5634	423.5	1.63667							0.0633333	3.25667		0.743333	4.47
	2.0683	423.5	0.0633333	1.94272	332.75	3.25667							6.44333	1.21		1.52333	0.00666667
	1.92665	363	6.44333	1.8226	393.25	1.21							0.39	2.33667		4.12333	0.0233333
	2.17878	393.25	0.39	2.48778	393.25	2.33667							0.22	0.446667		1.04667	2.45333
	1.37886	211.75	0.22	1.76218	332.75	0.446667							4.89	2.58		2.72333	1.49
	1.9979	363	4.89	2.19664	423.5	2.58							0.0633333	0.33		0.19	0.0533333
	2.22469	423.5	0.0633333	1.89144	423.5	0.33							0.313333	1.76667		1.45	7.52333
	2.64598	211.75	0.313333	2.16493	332.75	1.76667							0.01	10.3967		0.0266667	0.116667
	1.92803	393.25	0.01	2.58176	363	10.3967							0.18	1.69333		3.76	0.04
	1.96678	363	0.18	2.93868	393.25	1.69333							0.37	2.3		2.31667	0.203333
	1.89923	393.25	0.37	2.43944	363	2.3							1.65333	8.74		0.786667	5.94667
	1.97829	393.25	1.65333	2.5405	393.25	8.74							0.76	6.48333		9.72	7.94
	2.33347	363	0.76	3.20147	393.25	6.48333							18.08	0.01		1.24667	6.16333
	0.845866	151.25	18.08	1.653	272.25	0.01							0.966667	4.46		0.233333	1.02333
	1.74319	363	0.966667	3.31707	302.5	4.46							4.08	9.78		4.59	0.0366667
	1.53852	302.5	4.08	2.67571	393.25	9.78							1.02333	5.33333		0.14	1.77667
	1.84649	363	1.02333	2.60228	484	5.33333							0.133333	7.76		8.97333	0.12
	1.77457	272.25	0.133333	2.44282	363	7.76							0.306667	14.7333		1.45667	13.3967
	2.16014	393.25	0.306667	2.88164	423.5	14.7333							0.09	0.0533333		0.113333	1.64667
	2.17223	393.25	0.09	2.06656	332.75	0.0533333							2.98667	1.39667		0.0766667	1.37333
	1.69396	363	2.98667	1.90152	332.75	1.39667							0.00666667	7.09333		0.783333	2.28
	1.5181	181.5	0.00666667	2.06434	423.5	7.09333							9.72667	7.17333		1.54667	0
	0.964892	181.5	9.72667	2.32186	393.25	7.17333							6.02	1.28		0.176667	14.8833
	2.38394	393.25	6.02	1.5991	332.75	1.28							0.423333	7.2		2.8	6.31333
	2.09646	363	0.423333	2.15018	423.5	7.2							0.116667	2.54		5.94	3.37667
	2.21242	393.25	0.116667	2.32473	302.5	2.54							0.88	4.31667		0.813333	0.04
	2.10388	423.5	0.88	2.2602	423.5	4.31667							5.35667	0.983333		3.34667	2.78
	3.15649	574.75	5.35667	2.87114	453.75	0.983333							0.74	0.17		0.976667	2.79
	1.98434	363	0.74	2.17013	393.25	0.17							2.31667	1.6		0.0633333	0.0233333
	1.80969	393.25	2.31667	1.8711	302.5	1.6							0.786667	4.9		6.44333	0.333333
	2.08587	363	0.786667	2.76666	393.25	4.9							9.72	0.0333333		0.39	9.62667
	3.50872	514.25	9.72	2.81623	363	0.0333333							1.24667	4.47		4.89	8.07333
	2.07352	302.5	1.24667	3.33476	423.5	4.47							0.13	0.00666667		0.0633333	1.76333
	1.82167	181.5	0.13	2.00197	272.25	0.00666667							5.94	0.0233333		0.313333	1.34333
	1.86682	423.5	5.94	2.57098	393.25	0.0233333							0.813333	0.683333		0.01	0.526667
	1.509	272.25	0.813333	1.07928	242	0.683333							3.34667	2.45333		2.21	0.736667
	3.48136	484	3.34667	3.36585	393.25	2.45333							0.976667	1.49		0.326667	2.16333
	1.59318	363	0.976667	2.09398	332.75	1.49							2.21	0.0533333		0.176667	0.326667
	2.10796	453.75	2.21	2.74671	363	0.0533333							0.1	7.52333		0.03	0.0466667
	2.51883	302.5	0.1	2.74759	393.25	7.52333							0.296667	0.116667		0.583333	4.82667
	2.35797	363	0.296667	2.41843	363	0.116667							0.206667	0.04		0.376667	4.37333
	3.05573	484	0.206667	1.75062	363	0.04							2.23333	0.203333		0.03	2.53
	2.07682	423.5	2.23333	1.98549	332.75	0.203333							7.55333	5.94667		1.06	5.3
	1.95148	302.5	7.55333	1.89694	332.75	5.94667							0.513333	7.94		0.18	15.67
	1.22332	121	0.513333	2.49246	484	7.94							1.12333	6.16333		0.37	2.35
	2.7091	393.25	1.12333	2.62688	393.25	6.16333							3.74667	1.69333		1.65333	25.7933
	1.96248	423.5	3.74667	0.837388	151.25	1.69333							13.6667	1.02333		0.76	2.07
	2.33292	363	13.6667	2.00423	242	1.02333							0.113333	0.0366667		0.1	2.47333
	2.89625	242	0.113333	1.71884	363	0.0366667							2.77333	1.77667		0.966667	4.30333
	2.87408	484	2.77333	2.56671	393.25	1.77667							0.08	0.12		4.08	2.88333
	2.86198	272.25	0.08	1.53192	242	0.12							0.146667	13.3967		1.02333	0.11
	2.44029	363	0.146667	3.01775	393.25	13.3967							0.116667	1.64667		0.133333	0.483333
	2.20014	302.5	0.116667	2.86118	332.75	1.64667							3.56667	1.37333		0.306667	7.29333
	2.61796	363	3.56667	2.68312	393.25	1.37333							0.26	2.28		0.09	0.0933333
	1.88523	302.5	0.26	1.97976	453.75	2.28							0.106667	0		2.98667	0.253333
	2.11186	363	0.106667	2.51335	332.75	0							0.29	14.8833		4.21333	0.01
	2.29985	332.75	0.29	3.05265	453.75	14.8833							0.626667	6.31333		0.61	0
	2.17782	393.25	0.626667	2.12244	423.5	6.31333							0.0966667	3.37667		0.163333	2.44
	2.05748	363	0.0966667	1.92443	363	3.37667							0.0233333	0.04		0.596667	1.69
	1.70829	302.5	0.0233333	1.92429	363	0.04							0.216667	2.78		2.16	2.37333
	1.97585	363	0.216667	2.39506	332.75	2.78							0.133333	2.79		1.50667	0.02
	1.96473	363	0.133333	3.18014	302.5	2.79							2.22333	0.0233333		2.40667	2.72667
	1.83114	363	2.22333	2.20862	393.25	0.0233333							1.43	0.333333		0.296667	1.28667
	2.16538	393.25	1.43	2.11823	423.5	0.333333							0.0133333	9.62667		0.206667	3.01
	2.20784	393.25	0.0133333	1.93683	423.5	9.62667							2.62	8.07333		2.23333	2.07667
	2.17942	302.5	2.62	2.50293	484	8.07333							0.18	1.76333		7.55333	1.63333
	1.9916	363	0.18	2.61376	423.5	1.76333							1.31333	1.34333		1.12333	4.21333
	1.82531	332.75	1.31333	2.47164	393.25	1.34333							0.0866667	0.526667		3.74667	0.113333
	2.3658	363	0.0866667	3.71403	726	0.526667							0.743333	0.736667		13.6667	1.98
	1.87143	302.5	0.743333	2.45998	393.25	0.736667							1.52333	2.16333		0.113333	0.776667
	2.20264	423.5	1.52333	2.30795	363	2.16333							4.12333	0.326667		0.42	0.2
	1.88926	363	4.12333	2.00386	302.5	0.326667							1.04667	0.0466667		0.0433333	0.266667
	1.96121	332.75	1.04667	1.52541	363	0.0466667							2.72333	4.82667		0.383333	2.01
	2.37499	393.25	2.72333	2.57102	363	4.82667							0.19	4.37333		0.02	1.08667
	2.05556	393.25	0.19	1.97357	332.75	4.37333							1.45	2.53		6.02	0.176667
	1.90265	363	1.45	1.50923	242	2.53							0.0266667	5.3		0.423333	9.59
	1.95974	363	0.0266667	2.47664	453.75	5.3							3.76	15.67		2.77333	10.37
	1.75216	302.5	3.76	2.21531	423.5	15.67							8.97333	2.35		0.08
	2.20658	393.25	8.97333	2.53197	423.5	2.35							1.45667	25.7933		0.02
	1.42694	272.25	1.45667	2.75117	514.25	25.7933							0.113333	2.07		0.0733333
	2.10324	393.25	0.113333	2.52733	393.25	2.07							0.0766667	2.47333		0.106667
	2.09242	302.5	0.0766667	2.72063	393.25	2.47333							0.783333	4.30333		0.0466667
	2.03049	423.5	0.783333	2.63894	332.75	4.30333							1.54667	2.88333		1.95333
	2.31082	393.25	1.54667	2.30121	393.25	2.88333							0.176667	0.11		0.0166667
	2.07846	393.25	0.176667	1.81579	363	0.11							2.8	0.483333
	1.95417	393.25	2.8	2.3317	453.75	0.483333							0.326667	7.29333
	2.7812	423.5	0.326667	3.59468	393.25	7.29333							0.176667	0.0933333
	2.24232	363	0.176667	1.40329	242	0.0933333							0.03	0.253333
	1.82804	332.75	0.03	2.0628	302.5	0.253333							0.583333	0.01
	1.71912	363	0.583333	1.99453	363	0.01							0.376667	0
	1.76564	363	0.376667	2.02567	302.5	0							0.03	2.44
	2.09742	393.25	0.03	2.77265	453.75	2.44							1.06	1.69
	2.12058	302.5	1.06	2.35681	393.25	1.69							4.21333	2.37333
	2.23098	393.25	4.21333	2.49236	453.75	2.37333							0.61	0.02
	2.19089	363	0.61	1.95434	363	0.02							0.163333	2.72667
	2.24909	363	0.163333	2.60991	302.5	2.72667							0.596667	1.28667
	2.27934	363	0.596667	2.26098	423.5	1.28667							2.16	17.4933
	2.11528	332.75	2.16	1.53103	181.5	17.4933							1.50667	3.01
	1.94266	423.5	1.50667	3.75995	393.25	3.01							2.40667	2.07667
	2.43821	393.25	2.40667	2.52883	393.25	2.07667							0.42	1.63333
	1.57585	332.75	0.42	2.14233	363	1.63333							0.0433333	4.21333
	2.09716	363	0.0433333	2.12794	332.75	4.21333							0.383333	0.113333
	2.72432	363	0.383333	2.44843	393.25	0.113333							0.02	1.98
	1.62768	272.25	0.02	1.88029	393.25	1.98							0.02	0.776667
	2.16594	332.75	0.02	2.21106	272.25	0.776667							0.0733333	24.6867
	2.56596	302.5	0.0733333	1.14967	90.75	24.6867							0.106667	0.2
	2.29512	363	0.106667	2.17384	332.75	0.2							0.0466667	0.266667
	2.07381	393.25	0.0466667	2.27472	302.5	0.266667							1.95333	2.01
	1.83049	393.25	1.95333	1.53062	211.75	2.01							0.0166667	1.08667
	2.37635	363	0.0166667	2.85265	423.5	1.08667								0.176667
				2.88491	423.5	0.176667								9.59
				3.13814	423.5	9.59								10.37
				1.81409	242	10.37
