# Supplementary material for: Suppressed prefrontal neuronal firing variability and impaired social representation in IRSp53-mutant mice
Source: eLife. 2022 Nov 1;11:e74998. doi: 10.7554/eLife.74998 (PMC9662818; doi:10.7554/eLife.74998)
Supplement: Figure 3—figure supplement 2—source data 1. — The excel file contains the numerical data used to generate Figure 3—figure supplement 2A–I. [file elife-74998-fig3-figsupp2-data1.xlsx]

## Sheet: Fig3_S2
	Fig 3_S2A	Social z-score				Fig 3_S2B	Object z-score				Fig 3_S2C	Left z-score				Fig 3_S2D	Right z-score				Fig 3_S2E	|Social z-score|				Fig 3_S2F	|Object z-score|				Fig 3_2H	Trial consistency (%)		Fig 3_2I	Trial consistency (%)
	WT		KO			WT		KO			WT		KO			WT		KO			WT		KO			WT		KO			WT	KO		WT	KO
	First S-O	Second S-O	First S-O	Second S-O		First S-O	Second S-O	First S-O	Second S-O		First S-O	Second S-O	First S-O	Second S-O		First S-O	Second S-O	First S-O	Second S-O		Proximal	Distal	Proximal	Distal		Proximal	Distal	Proximal	Distal		81.8182	63.1579		70	58.6207
	0.490908	0.121853	0.516551	0.55488		0.4519	0.465606	0.508889	0.124599		0.4519	0.121853	0.516551	0.124599		0.490908	0.465606	0.508889	0.55488		0.79101	0.234673	1.82319	1.16836		0.454564	0.428892	0.113885	0.400152		81.8182	66.6667		86.3636	68.9655
	-0.184714	0.0863375	0.803482	0.553502		0.054317	0.0372322	-0.234326	0.333465		0.054317	0.0863375	0.803482	0.333465		-0.184714	0.0372322	-0.234326	0.553502		0.000762737	0.539254	0.678991	0.236772		1.36194	0.700856	0.01259	0.170846		85.7143	73.913		77.2727	62.5
	-0.876814	-0.214283	0.60902	0.209814		-0.490131	-0.637559	-0.092361	0.604351		-0.490131	-0.214283	0.60902	0.604351		-0.876814	-0.637559	-0.092361	0.209814		0.142579	0.0883549	0.328139	0.311622		0.0719241	0.0107084	0.00978092	0.309815		90.4762	86.9565		90.9091	68.75
	-0.480211	-0.682469	0.0606621	0.184784		-0.104164	-0.51552	0.50613	-0.175034		-0.104164	-0.682469	0.50613	0.184784		-0.480211	-0.51552	0.0606621	-0.175034		0.806553	0.728911	0.217666	0.0831084		0.685415	0.352659	0.373185	0.454585		45.4545	78.9474		94.4444	81.25
	0.69775	0.828747	-0.353877	-0.15067		1.91033	0.804827	-0.523381	-0.533078		1.91033	0.828747	-0.523381	-0.15067		0.69775	0.804827	-0.353877	-0.533078		0.674374	0.240815	0.305621	0.223608		0.478346	0.46843	0.404108	0.389939		72.7273	83.3333		50	75
	0.38438	0.877835	0.802523	0.0600365		0.33308	0.301756	-0.042496	0.229919		0.33308	0.877835	-0.042496	0.0600365		0.38438	0.301756	0.802523	0.229919		0.718921	0.796118	1.13673	0.165318		0.932051	0.677033	0.260238	0.0472222		65.3846	61.9048		88.8889	66.6667
	0.107642	0.122162	0.173169	0.42827		-0.124571	0.131046	0.964336	0.632208		-0.124571	0.122162	0.964336	0.42827		0.107642	0.131046	0.173169	0.632208		0.940708	0.2777	0.513554	0.111979		0.0767541	0.109073	1.3256	0.685922		65.3846	83.3333		81.25	70.5882
	0.149842	-0.327155	0.130279	-0.158915		-0.200927	-0.00774621	-0.288862	-0.36098		-0.200927	-0.327155	-0.288862	-0.158915		0.149842	-0.00774621	0.130279	-0.36098		0.0502181	0.0346427	0.26454	0.0296705		0.0157206	0.179872	0.184174	0.24176		65.3846	100		50	64.7059
	-0.188793	-0.232655	0.193691	0.265466		-0.480348	-0.425765	0.414903	-0.143234		-0.188793	-0.425765	0.414903	0.265466		-0.480348	-0.232655	0.193691	-0.143234		0.0602687	0.00419429	0.0875392	0.0660551		0.00926966	0.0942025	0.043963	0.296356		61.5385	70		29.4118	72.2222
	0.0388968	-0.242972	-0.266406	-0.256973		-0.294625	0.093252	-0.261261	-0.204552		0.0388968	0.093252	-0.261261	-0.256973		-0.294625	-0.242972	-0.266406	-0.204552		0.131951	0.261145	0.33844	0.161867		0.445647	0.314828	0.115293	0.240852		53.8462	86.3636		90.4762	69.2308
	0.714583	0.126912	0.57033	0.33909		0.550651	2.06365	0.172497	-0.172744		0.714583	2.06365	0.172497	0.33909		0.550651	0.126912	0.57033	-0.172744		0.221758	0.590872	0.770992	0.0328282		0.103046	0.00741175	0.468877	0.356263		84.6154	80		76.1905	82.1429
	-0.49532	-0.645312	0.00796901	-0.0654913		-0.00912638	-0.580584	-0.173136	-0.277587		-0.49532	-0.580584	-0.173136	-0.0654913		-0.00912638	-0.645312	0.00796901	-0.277587		0.510187	1.12189	0.173205	0.0666475		1.73891	0.73159	0.391146	0.0112848		53.8462	85.7143		80.9524	85
	3.94171	2.39705	-0.607835	0.124529		1.49997	4.7644	0.129277	-0.544203		3.94171	4.7644	0.129277	0.124529		1.49997	2.39705	-0.607835	-0.544203		0.448423	0.602465	0.707865	0.329005		0.491161	0.476887	0.138257	0.179005		93.3333	80.9524		80.9524	70.3704
	-0.14328	0.267582	-0.557468	0.550789		-0.376286	-0.141639	-0.358185	-0.0178848		-0.14328	-0.141639	-0.557468	-0.0178848		-0.376286	0.267582	-0.358185	0.550789		4.35299	3.39174	0.123167	0.461001		4.73933	1.87771	0.263497	0.0763641		80	96.1538		68	100
	0.823126	1.23698	0.217793	0.585075		0.152892	1.09042	-0.401508	-0.404719		0.823126	1.09042	0.217793	-0.404719		0.152892	1.23698	-0.401508	0.585075		0.0210042	0.030311	0.320467	0.458356		0.223485	0.0469043	0.4452	0.133731		76.6667	92.3077		74.0741	100
	-0.425581	-0.300426	-0.501892	-0.421802		0.285545	-0.810653	-0.422418	-0.267082		-0.425581	-0.810653	-0.501892	-0.267082		0.285545	-0.300426	-0.422418	-0.421802		1.08345	0.516431	0.443631	0.415402		1.03325	0.847347	0.367365	0.132188		53.3333	84.6154		55.5556	100
	0.0700277	-0.428087	0.750307	-0.308092		1.64031	0.516642	0.435111	0.0815772		1.64031	-0.428087	0.750307	0.0815772		0.0700277	0.516642	0.435111	-0.308092		0.354914	0.378386	0.252082	0.216966		0.695372	0.43116	0.0838225	0.612118		82.1429	64		70.3704	71.875
	-0.526702	0.444138	-0.629452	0.418816		-0.52629	-0.319407	-0.0133956	0.0334687		-0.52629	0.444138	-0.629452	0.0334687		-0.526702	-0.319407	-0.0133956	0.418816		0.0305776	0.162344	0.691123	0.0889508		1.0301	0.511577	0.2578	0.0144312		82.1429	60		66.6667	84.375
	-0.0296908	1.13146	0.413815	0.212241		0.486449	-0.196354	-0.184246	1.81106		0.486449	1.13146	0.413815	1.81106		-0.0296908	-0.196354	-0.184246	0.212241		0.61211	0.481825	1.0214	0.339329		0.684127	0.273721	1.39042	0.0409659		61.9048	71.0526		65.625	96.875
	-0.804719	0.169597	-0.207391	-0.0747478		-0.403305	-0.779987	0.702454	0.296273		-0.403305	0.169597	0.702454	-0.0747478		-0.804719	-0.779987	-0.207391	0.296273		0.0852342	0.0243672	0.25729	0.14209		0.490114	0.132912	0.468873	0.234325		76.1905	66.6667		87.8788	85.7143
	1.10917	1.07141	2.25091	0.178622		2.37561	2.11082	2.00699	1.59855		2.37561	1.07141	2.00699	0.178622		1.10917	2.11082	2.25091	1.59855		0.809598	0.771418	1.22925	0.226758		0.638649	0.723676	1.61386	0.706542		61.2903	58.3333		84.8485	91.6667
	-0.0610143	0.294724	-0.203782	-0.27878		0.253702	0.295189	-0.091576	-0.175578		-0.0610143	0.295189	-0.091576	-0.27878		0.253702	0.294724	-0.203782	-0.175578		0.560546	1.19201	0.237115	0.0808348		1.57407	1.79518	0.125451	0.0131622		83.3333	76.4706		78.0488	90.9091
	-0.157979	0.0554858	-0.0948388	-0.18359		-0.11024	-0.0403628	-0.375834	0.241689		-0.157979	-0.0403628	-0.0948388	0.241689		-0.11024	0.0554858	-0.375834	-0.18359		0.11491	0.243239	0.130281	0.235466		0.342656	0.209808	0.392917	0.152996		100	100		66.6667	45.4545
	-0.370915	-0.127976	-0.194686	-0.375199		-0.19271	-0.115473	-0.242858	-0.395197		-0.370915	-0.115473	-0.242858	-0.375199		-0.19271	-0.127976	-0.194686	-0.395197		0.207122	0.0058397	0.223969	0.298826		0.355214	0.045942	0.154562	0.0517565		66.6667	90.4762		58.0645	70
	-0.100013	-0.384186	-0.502939	-0.596484		-0.526231	-0.412102	-0.592221	-0.392754		-0.100013	-0.412102	-0.592221	-0.596484		-0.526231	-0.384186	-0.502939	-0.392754		0.291252	0.619573	0.454946	0.398398		0.456327	0.605898	0.5611	0.312205		53.8462	70.8333		59.4595	85
	-0.343156	0.165428	0.251993	-0.267099		0.361274	-0.468256	0.0251281	0.0338051		0.361274	0.165428	0.0251281	-0.267099		-0.343156	-0.468256	0.251993	0.0338051		0.0707136	0.208642	0.0194012	0.65247		0.305518	0.316038	0.100037	0.859633		60.5263	94.1176		66.6667	94.4444
	-0.158516	0.149939	0.429208	-0.258132		-0.594166	-0.619244	0.764766	-0.315339		-0.158516	-0.619244	0.764766	-0.258132		-0.594166	0.149939	0.429208	-0.315339		0.35297	0.22669	0.0692303	0.00952331		0.614395	0.203031	0.52734	0.351088		96	52.9412		100	77.7778
	-0.0286203	-0.0336411	-0.41086	-0.597614		0.311165	0.100662	-0.452738	-0.564414		-0.0286203	0.100662	-0.41086	-0.564414		0.311165	-0.0336411	-0.452738	-0.597614		0.0404346	0.167433	0.41501	0.442433		0.58648	0.0317438	0.511117	0.258832		56	76.4706		92.3077	94.4444
	-0.60658	-0.768078	0.355642	-0.209738		-1.33052	-0.878912	0.484138	-0.250122		-0.60658	-0.878912	0.355642	-0.250122		-1.33052	-0.768078	0.484138	-0.209738		1.21278	0.3544	0.557564	0.0693824		1.07653	0.525306	0.00493662	0.0137947		92	100		69.2308	90.9091
	-0.284419	-0.122763	2.46872	3.25493		-0.360637	-0.318069	1.15683	1.697		-0.360637	-0.122763	2.46872	1.697		-0.284419	-0.318069	1.15683	3.25493		0.111702	0.28589	3.09793	0.203734		0.36812	0.297143	2.40636	0.0702757		94.4444	88.8889		58.3333	92.3077
	-0.44488	-0.868487	0.319948	-0.0845785		-0.778822	-0.71459	0.534187	-0.195349		-0.778822	-0.868487	0.534187	-0.0845785		-0.44488	-0.71459	0.319948	-0.195349		0.425461	0.387571	0.330819	0.119025		0.897665	0.557297	0.13157	0.118298		61.1111	26.6667		65.625	7.69231
	0.251464	-0.22767	-0.252362	-0.356106		0.141853	0.0912732	-0.195397	-0.0860872		0.141853	-0.22767	-0.195397	-0.356106		0.251464	0.0912732	-0.252362	-0.0860872		0.608724	0.0280373	0.406259	0.235827		0.245864	0.0862745	0.119637	0.33658		22.2222	100		71.875	68.4211
	-0.210888	-0.375936	-0.166185	-0.138407		-0.413284	0.122658	0.254331	-0.101626		-0.413284	-0.375936	-0.166185	-0.101626		-0.210888	0.122658	0.254331	-0.138407		0.144908	0.139503	0.132429	0.14251		0.107373	0.0348908	0.138253	0.0475815		89.4737	93.3333		66.6667	87.5
	0.535317	-0.24603	0.659155	-0.0789049		-0.518244	0.334789	0.258505	-0.00122444		-0.518244	-0.24603	0.659155	-0.00122444		0.535317	0.334789	0.258505	-0.0789049		0.351832	0.472634	0.435389	1.03251		0.243236	0.177484	0.142879	0.194976		38.4615	76.6667		60.5263	50
	-0.107888	0.933781	-0.32284	0.0981068		0.677654	-0.136224	0.250255	-0.517335		-0.107888	-0.136224	-0.32284	-0.517335		0.677654	0.933781	0.250255	0.0981068		0.897775	0.676058	0.23238	0.3696		0.00398557	0.504668	0.163135	0.544585		92.3077	95.6522		78.9474	73.913
	0.436331	-0.481441	-0.320082	-0.215418		-0.453175	-0.204371	-0.342005	-0.547279		0.436331	-0.204371	-0.342005	-0.215418		-0.453175	-0.481441	-0.320082	-0.547279		0.354149	0.234934	0.274416	0.301445		0.370158	0.241887	0.668536	0.0146084		76.9231	95		32.4324	60.8696
	-0.185308	-0.339883	0.623052	1.06597		-0.265254	-0.0811402	0.763561	0.253971		-0.265254	-0.339883	0.763561	1.06597		-0.185308	-0.0811402	0.623052	0.253971		0.858649	0.523629	0.643156	0.719043		1.23431	0.35667	0.441092	0.735268		90.4762	82.3529		81.8182	94.4444
	-0.0268947	-0.170814	0.387962	0.903475		-0.299254	-0.309692	1.63033	-0.139887		-0.299254	-0.170814	1.63033	0.903475		-0.0268947	-0.309692	0.387962	-0.139887		0.0638931	0.0488162	0.961477	0.782883		0.0224465	0.0976055	0.321145	0.974016		54.7619	100		66.6667	76.9231
	-0.0613669	-0.523428	-0.123962	-0.00788264		-0.413031	-0.252505	-0.0549814	0.697881		-0.413031	-0.523428	-0.0549814	-0.00788264		-0.0613669	-0.252505	-0.123962	0.697881		0.296961	0.237027	0.140261	0.0107893		0.118298	0.0929119	0.00379671	0.0940784		43.75	90		76.9231	61.1111
	-0.0239726	0.187232	0.171765	1.17108		-0.0199392	0.644321	-0.0552763	0.455246		-0.0199392	0.187232	0.171765	0.455246		-0.0239726	0.644321	-0.0552763	1.17108		0.834493	0.13402	0.544118	0.73963		0.081473	0.280043	0.406972	0.218956		93.75	94.1176		85.7143	83.3333
	0.0498137	-0.259912	-0.546275	0.0761185		0.15832	-0.0676207	0.29759	0.614251		0.15832	-0.259912	-0.546275	0.614251		0.0498137	-0.0676207	0.29759	0.0761185		0.473252	0.46428	0.31399	0.20372		0.434937	0.412743	0.392652	0.03772		100	100		96	86.2069
	0.435025	-0.238686	-0.554787	0.0202271		0.622951	0.409073	0.0170626	1.15474		0.622951	-0.238686	-0.554787	1.15474		0.435025	0.409073	0.0170626	0.0202271		0.0992671	0.0193585	0.103387	0.337029		0.0440321	0.226731	0.96124	0.175462		74.2857	80.9524		90	82.7586
	-0.308469	-0.0594306	0.699155	0.00242464		-0.0215305	0.490471	-0.144811	-0.246231		-0.0215305	-0.0594306	0.699155	-0.246231		-0.308469	0.490471	-0.144811	0.00242464		0.04618	0.10571	0.525062	0.236158		0.277269	0.0435721	0.332141	0.134151		61.9048	86.6667		77.2727	68.9655
	-0.179291	-0.159427	3.04743	0.969025		0.157485	0.06643	0.836707	0.00597445		0.157485	-0.159427	0.836707	0.969025		-0.179291	0.06643	3.04743	0.00597445		0.692202	0.357088	2.68554	1.53346		0.0979548	0.239364	0.429822	0.234979		68.4211	85.1852		94.4444	100
	0.0856243	0.415787	-0.652931	0.0324213		0.362496	0.356616	0.0380479	-0.332391		0.362496	0.415787	0.0380479	0.0324213		0.0856243	0.356616	-0.652931	-0.332391		0.264773	0.269095	0.544387	0.229295		0.423743	0.25656	0.237698	0.0247361		82.6087	88.5714		94.4444	91.6667
	0.948665	-0.255918	-0.6328	-0.657191		0.177371	0.10471	-0.721868	-0.977882		0.177371	-0.255918	-0.721868	-0.657191		0.948665	0.10471	-0.6328	-0.977882		0.0330754	0.0918266	0.728088	0.552226		0.118969	0.0510265	0.93818	0.524241		90.9091	80		81.25	94.4444
	0.115568	1.43461	0.00539029	-0.24428		0.122789	-0.219181	-0.141105	-0.0909066		0.122789	1.43461	0.00539029	-0.0909066		0.115568	-0.219181	-0.141105	-0.24428		0.50768	0.350823	0.0226568	0.120268		0.604817	0.11881	0.239087	0.0906554		100	88.4615		100	61.5385
	0.359605	-0.436329	-0.204041	0.668796		-0.445043	-0.309211	0.934311	0.230414		-0.445043	-0.436329	-0.204041	0.230414		0.359605	-0.309211	0.934311	0.668796		0.921858	0.46157	0.0545899	0.0845342		0.173936	0.614599	0.880852	0.507117		90.4762	88.4615		90	100
	-0.122675	0.0172678	-0.230812	-0.388025		0.316858	0.869411	0.0463819	-0.179593		0.316858	0.0172678	-0.230812	-0.179593		-0.122675	0.869411	0.0463819	-0.388025		0.254982	0.00212986	0.207356	0.122506		0.652369	0.417564	0.531298	0.0459571		85.7143	92.3077		100	100
	-0.666021	-0.794835	0.00807944	-0.00737029		-0.588848	-0.910556	-0.33253	-0.371909		-0.588848	-0.794835	0.00807944	-0.371909		-0.666021	-0.910556	-0.33253	-0.00737029		1.25259	0.663151	0.150307	0.195873		0.629392	0.0957141	0.396992	0.329057		81.8182	100		94.1176	85.1852
	-0.86453	-0.587627	-0.0170609	0.41947		-1.13356	-1.00271	0.00366781	-0.0100327		-1.13356	-0.587627	-0.0170609	-0.0100327		-0.86453	-1.00271	0.00366781	0.41947		0.342829	0.298169	0.0914639	0.066314		0.247836	0.306358	0.251237	0.0374814		91.3043	90		95.2381	74.0741
	-0.132089	-0.0645173	0.00423433	1.76375		-0.141199	0.0716377	-0.370111	-0.151484		-0.141199	-0.0645173	0.00423433	-0.151484		-0.132089	0.0716377	-0.370111	1.76375		1.64181	1.36566	0.177512	0.0094686		1.83057	0.839913	0.115106	0.259863		94.1176	88.8889		90.4762	68.1818
	-0.287944	-0.155419	1.09303	1.23346		-0.122376	-0.172316	0.524081	0.891742		-0.122376	-0.155419	1.09303	0.891742		-0.287944	-0.172316	0.524081	1.23346		0.735929	0.713019	1.33765	1.24163		0.0811031	0.180993	0.755941	0.493707		84.6154	100		100	96.2963
	0.714566	-0.004516	-0.238616	0.0707869		0.03398	0.464642	-0.125629	0.54367		0.03398	-0.004516	-0.238616	0.54367		0.714566	0.464642	-0.125629	0.0707869		0.035268	0.407412	0.210088	0.0370803		0.145033	0.700832	0.0746129	0.502237		80.7692	100		96	77.7778
	-0.430465	-0.444684	0.420039	0.493901		-0.35258	-0.372863	0.475675	0.187144		-0.35258	-0.444684	0.420039	0.187144		-0.430465	-0.372863	0.475675	0.493901		0.0891178	0.0397116	0.590855	0.453389		0.158578	0.015724	0.601124	0.00724857		96.1538	91.6667		100	95.8333
	0.312501	-0.276607	0.0562253	-0.299834		-0.0406934	0.314819	0.171757	-0.28194		-0.0406934	-0.276607	0.171757	-0.299834		0.312501	0.314819	0.0562253	-0.28194		0.747376	0.648335	0.167817	0.327234		0.595052	0.535182	0.00216156	0.168204		100	95.2381		100	83.3333
	-0.143095	-0.0452684	-0.808773	-0.345353		0.019899	0.319542	-0.631021	-0.547362		0.019899	-0.0452684	-0.631021	-0.345353		-0.143095	0.319542	-0.808773	-0.547362		0.749834	0.503523	0.538037	0.639626		0.549068	0.44647	0.638347	0.503208		84.6154	69.2308		90.625	78.125
	0.855205	0.178246	-0.111031	-0.0588783		0.151615	0.243632	0.305772	-0.386938		0.151615	0.178246	0.305772	-0.0588783		0.855205	0.243632	-0.111031	-0.386938		0.301858	0.311443	0.142113	0.0260344		0.111991	0.196842	0.185782	0.32856		100	87.5		78.7879	68.75
	-0.151123	-0.415511	-0.108381	-0.218054		-0.429911	-0.316669	-0.273708	-0.244247		-0.429911	-0.415511	-0.273708	-0.218054		-0.151123	-0.316669	-0.108381	-0.244247		0.476241	0.542836	0.152567	0.0918013		0.387371	0.521984	0.0190014	0.0701968		93.3333	91.6667		81.4815	100
	0.325322	0.0819371	0.131595	-0.106758		0.222226	0.336309	0.0258781	0.0649866		0.222226	0.0819371	0.0258781	-0.106758		0.325322	0.336309	0.131595	0.0649866		0.503614	0.661914	0.43724	0.259602		0.0417751	0.0566533	0.959244	0.643013		100	100		100	100
	-0.541705	-0.430002	-0.216616	-0.457028		-0.573298	-0.59627	-0.879649	-0.639873		-0.573298	-0.430002	-0.879649	-0.457028		-0.541705	-0.59627	-0.216616	-0.639873		0.105909	0.294827	0.354757	0.0631097		0.220271	0.342716	0.194697	0.117154		96.4286	35.2941		92.3077	92.8571
	0.616765	0.553513	-0.470459	-0.0252066		0.21268	0.420828	0.0540758	-0.36838		0.21268	0.553513	0.0540758	-0.0252066		0.616765	0.420828	-0.470459	-0.36838		1.44222	0.718345	0.735263	0.349495		2.63045	1.20861	0.651022	0.19705		76.1905	93.3333		100	100
	-0.141191	0.6672	-0.534541	-0.426783		0.358429	0.511167	-0.387188	-0.615903		-0.141191	0.511167	-0.387188	-0.426783		0.358429	0.6672	-0.534541	-0.615903		0.371863	0.306966	0.13828	0.0654564		0.484634	0.215673	0.0121735	0.0997121		83.3333	66.6667		76.9231	81.8182
	0.888297	0.562647	-0.205828	-0.0499332		0.0642195	0.137156	0.105308	0.162619		0.888297	0.137156	-0.205828	0.162619		0.0642195	0.562647	0.105308	-0.0499332		0.154227	0.131802	0.4328	0.468141		0.0350218	0.107779	0.240405	0.313599		77.4194	80		83.3333	100
	-0.34153	-0.301325	-0.523972	-0.437755		-0.03612	-0.350752	0.185457	-0.318084		-0.34153	-0.350752	-0.523972	-0.318084		-0.03612	-0.301325	0.185457	-0.437755		0.00352684	0.14581	0.238268	0.0802017		0.0296617	0.0597011	0.11091	0.673861		87.0968	100		88.8889	94.7368
	-0.0294861	-0.289956	-0.109418	0.292071		-0.127166	-0.276897	0.107772	0.3233		-0.0294861	-0.276897	-0.109418	0.3233		-0.127166	-0.289956	0.107772	0.292071		0.400925	0.00620219	0.502409	0.342301		0.454481	0.398166	0.349339	0.297151		97.6744	68.4211		78.3784	72.2222
	1.70662	0.0104787	0.448791	0.337495		0.239398	1.57254	0.475816	0.177852		1.70662	1.57254	0.448791	0.177852		0.239398	0.0104787	0.475816	0.337495		0.0854705	0.00268849	0.379868	0.206374		0.200112	0.0666071	0.208014	0.112753		79.4118	78.9474		100	87.5
	0.847992	-0.0530624	0.00130807	0.945613		0.465257	0.0908895	-0.0603583	0.647291		0.847992	0.0908895	0.00130807	0.647291		0.465257	-0.0530624	-0.0603583	0.945613		0.205966	0.214701	0.295725	0.0779671		0.0162259	0.108072	0.126049	7.94616e-05		94.4444	83.3333		90	66.6667
	0.188658	0.421612	-0.0744729	-1.18026		0.0780375	0.461998	-0.365318	-0.230625		0.188658	0.461998	-0.0744729	-0.230625		0.0780375	0.421612	-0.365318	-1.18026		0.456164	0.327889	0.427732	0.282525		0.330677	0.160334	0.0530156	0.0345401		61.1111	88.8889		50	100
	-0.402178	0.297039	-0.260402	0.368364		-0.0256594	-0.274912	-0.0368364	0.656281		-0.0256594	0.297039	-0.260402	0.656281		-0.402178	-0.274912	-0.0368364	0.368364		0.0404782	0.0688615	0.218877	0.0714203		0.492585	0.0190085	0.203506	0.435631		94.7368	83.3333		93.3333	80
	-0.724058	-0.700344	-0.30082	-0.281348		-0.704397	-0.549414	-0.0977679	-0.097394		-0.724058	-0.549414	-0.0977679	-0.281348		-0.704397	-0.700344	-0.30082	-0.097394		0.525131	0.0687634	0.061586	0.0178147		0.318842	0.136999	0.553403	0.355947		94.7368	96.1538		76.9231	68
	-0.640377	-0.8143	-0.177192	-0.156499		-0.57014	-0.435045	-0.158124	-0.0604131		-0.640377	-0.435045	-0.158124	-0.156499		-0.57014	-0.8143	-0.177192	-0.0604131		0.224877	0.0445412	0.235626	0.17029		0.20022	0.252484	0.56041	0.113963		88			100	69.2308
	0.313263	-0.00789653	0.258035	0.255989		0.165356	0.0508428	0.0212342	0.127566		0.313263	0.0508428	0.0212342	0.255989		0.165356	-0.00789653	0.258035	0.127566		0.0969197	0.144129	0.390932	0.40352		0.0955338	0.039191	0.78827	0.579084		76			91.6667	94.1176
	0.617246	0.496834	0.165367	-0.0233725		0.679631	0.179662	-0.172007	-0.0200578		0.617246	0.179662	-0.172007	-0.0233725		0.679631	0.496834	0.165367	-0.0200578		0.444233	0.245834	0.100065	0.50297		0.330609	0.0428088	0.0812988	0.741523		88			100	82.3529
	0.644649	1.50973	-0.0803638	-0.0101423		-0.20882	-0.179843	-0.653217	-0.0943755		0.644649	-0.179843	-0.653217	-0.0101423		-0.20882	1.50973	-0.0803638	-0.0943755		0.941684	0.811903	0.852468	0.493808		0.984355	0.721262	0.613067	0.413406		94.8718			100	17.6471
	0.367036	0.204076	-0.204348	-0.315858		0.27296	-0.0682665	0.0227054	-0.525757		0.27296	0.204076	0.0227054	-0.315858		0.367036	-0.0682665	-0.204348	-0.525757		0.0677522	0.130431	0.354558	0.237365		0.207462	0.0950015	0.4075	1.48333		92.1053			100	73.913
	0.775088	1.42076	-0.202311	0.741951		2.62189	1.18234	0.472059	0.593817		2.62189	1.42076	0.472059	0.741951		0.775088	1.18234	-0.202311	0.593817		0.396944	0.0593934	0.00673287	0.0952636		0.115229	0.0799305	0.37632	0.259926		90			85.1852	66.6667
	-0.607154	-0.0200309	-0.185025	0.479468		-0.424154	-0.545342	0.226142	0.375564		-0.424154	-0.0200309	0.226142	0.479468		-0.607154	-0.545342	-0.185025	0.375564		0.412544	0.100821	0.353373	0.401642		0.087202	0.457741	0.210744	0.4712		100			87.5	94.4444
	-0.339194	0.113398	-0.176827	-0.328355		0.132556	0.122302	-0.229257	-0.189305		0.132556	0.113398	-0.229257	-0.328355		-0.339194	0.122302	-0.176827	-0.189305		0.636319	0.12794	0.708399	0.261592		0.0317467	0.0421496	0.566007	0.333211		94.4444			76.3158	94.4444
	-0.485352	0.203865	-1.01734	-0.283737		0.193518	-0.413937	-0.677205	-0.345614		0.193518	0.203865	-0.677205	-0.283737		-0.485352	-0.413937	-1.01734	-0.345614		0.215957	0.271301	1.11116	0.132857		0.553418	0.189545	0.163163	0.2885		100			100	94.4444
	-0.0527189	0.293345	0.567795	0.0241833		0.681083	0.181962	0.189576	2.1731		0.681083	0.293345	0.189576	0.0241833		-0.0527189	0.181962	0.567795	2.1731		0.295762	0.288217	0.319489	0.170063		1.627	0.249935	0.053497	0.0770711		100			79.3103	92.5926
	0.0776044	0.0124655	0.558874	-0.0474035		-0.25113	0.160654	0.285876	0.10572		-0.25113	0.0124655	0.558874	0.10572		0.0776044	0.160654	0.285876	-0.0474035		0.485689	0.30241	0.663985	0.550078		0.0909264	0.0753325	0.841866	0.562942		100			86.2069	77.7778
	-0.303777	-0.134457	-0.240617	-0.493692		-0.0844798	-0.0106825	-0.139924	-0.355241		-0.0844798	-0.134457	-0.139924	-0.493692		-0.303777	-0.0106825	-0.240617	-0.355241		0.832729	0.839974	0.6003	0.0528153		0.814583	0.906854	0.0257526	0.391484		78.9474			92.8571
	-0.389243	-0.396645	-0.464262	-0.406835		-0.277878	-0.327493	-0.763575	-0.282159		-0.277878	-0.396645	-0.763575	-0.406835		-0.389243	-0.327493	-0.464262	-0.282159		1.55075	1.65368	0.342258	0.242765		3.36774	0.357412	0.476725	0.160621		87.5			57.1429
	-0.206768	-0.00141172	0.5871	0.502653		0.471355	-0.153036	0.199059	0.205522		0.471355	-0.00141172	0.199059	0.502653		-0.206768	-0.153036	0.5871	0.205522		0.0297744	0.0228985	0.31719	0.248311		0.933901	0.1645	1.1269	0.467948		84.375			100
	-0.0382434	0.575294	0.44667	-0.123713		-0.133923	-0.420337	-0.000592744	-0.158428		-0.133923	0.575294	-0.000592744	-0.123713		-0.0382434	-0.420337	0.44667	-0.158428		0.228774	0.0673089	0.794926	0.520242		0.508122	0.29776	0.431984	0.45692		100
	-0.106062	-0.175785	-0.740077	-0.339691		0.418677	0.0650024	-0.781409	-0.730689		-0.106062	0.0650024	-0.781409	-0.339691		0.418677	-0.175785	-0.740077	-0.730689		0.219932	0.289501	0.230352	0.218974		0.441634	0.269109	0.429576	0.23139		87.5
	-0.0119554	0.494409	0.106306	0.00947913		-0.104871	0.0721505	0.287604	0.617611		-0.0119554	0.0721505	0.287604	0.00947913		-0.104871	0.494409	0.106306	0.617611		0.147418	0.110737	0.0513027	0.0246663		0.0436257	0.173061	0.315672	0.109908		87.5
	-0.101761	-0.156603	-0.318897	-0.706202		-0.0921162	-0.0864674	-0.580246	-0.100295		-0.101761	-0.0864674	-0.580246	-0.706202		-0.0921162	-0.156603	-0.318897	-0.100295		0.67499	0.568303	0.63696	0.317659		1.15162	0.848818	0.813687	0.399422		82.3529
	-0.222996	-0.428019	0.286207	0.398638		-0.29491	0.0829592	0.929267	1.21405		-0.222996	0.0829592	0.286207	1.21405		-0.29491	-0.428019	0.929267	0.398638		0.21274	0.00509107	0.449089	0.289333		0.115264	0.234297	0.574292	0.215387		97.1429
	-0.935417	-0.778767	-0.111778	0.449338		-0.823667	-0.984903	-0.313109	-0.381691		-0.823667	-0.778767	-0.111778	-0.381691		-0.935417	-0.984903	-0.313109	0.449338		0.31401	0.305067	0.282904	0.227781		0.160691	0.284102	0.454895	0.214978		100
	-0.0398481	-0.122094	-0.652977	-0.349052		-0.225651	-0.13089	-0.307325	-0.521526		-0.225651	-0.122094	-0.652977	-0.521526		-0.0398481	-0.13089	-0.307325	-0.349052		0.230253	0.154908	0.822923	0.273047		0.378942	2.79622	1.31854	1.08086		80.7692
	-0.102314	-0.653732	-0.297986	-0.103964		0.41088	-0.0396466	-0.271735	-0.104049		0.41088	-0.653732	-0.297986	-0.104049		-0.102314	-0.0396466	-0.271735	-0.103964		0.339588	0.0975475	0.0710753	0.363125		0.318361	0.0168258	0.187063	0.0319222		100
	-0.403347	-0.222261	0.182255	0.553184		0.284462	0.303749	0.842288	1.03418		0.284462	-0.222261	0.182255	1.03418		-0.403347	0.303749	0.842288	0.553184		0.399688	0.447695	0.94966	0.516889		0.443528	0.601923	0.413298	0.518766		94.1176
	0.26953	0.766656	-0.455101	-0.398071		-0.124346	0.0700829	-0.522559	-0.490534		-0.124346	0.766656	-0.522559	-0.398071		0.26953	0.0700829	-0.455101	-0.490534		0.440366	0.6336	0.255431	0.168545		0.679199	0.638943	0.256629	0.291441		89.7436
	-0.29718	-0.196743	-0.443642	-0.255587		0.528663	-0.133883	-0.366082	-0.265294		0.528663	-0.196743	-0.366082	-0.255587		-0.29718	-0.133883	-0.443642	-0.265294		0.0824167	0.23259	0.797897	0.441611		0.0900669	0.452696	0.872909	0.564978		85.2941
	0.0632621	0.314575	1.06928	0.588067		1.39684	0.509507	1.70206	0.991347		1.39684	0.314575	1.70206	0.588067		0.0632621	0.509507	1.06928	0.991347		0.265928	0.263424	0.215311	0.107646		0.53362	0.186755	0.303969	0.206177		97.0588
	0.522879	0.408311	0.95607	-0.131592		0.198784	0.171912	-0.237205	-0.0292857		0.522879	0.171912	-0.237205	-0.131592		0.198784	0.408311	0.95607	-0.0292857		0.206551	0.0444729	0.607299	0.192503		1.04084	0.0823635	0.397814	0.0578612		89.6552
	-0.857201	-1.04503	1.04681	0.724448		-0.052351	-0.603927	-0.123704	0.566612		-0.857201	-0.603927	-0.123704	0.724448		-0.052351	-1.04503	1.04681	0.566612		0.494882	0.492433	0.0388543	0.235296		0.498757	0.142413	0.74077	0.0898275
	0.6205	-0.644708	-0.230301	-0.263988		0.590461	0.549776	-0.290437	-0.218342		0.6205	0.549776	-0.290437	-0.263988		0.590461	-0.644708	-0.230301	-0.218342		0.471443	0.358147	0.794459	0.747996		0.377258	0.0693744	0.752301	0.74423
	-0.200379	0.0185833	-0.084301	0.721261		-0.428539	-0.476203	0.496209	1.11706		-0.200379	-0.476203	0.496209	0.721261		-0.428539	0.0185833	-0.084301	1.11706		0.488224	0.260553	0.0973298	0.0125534		0.485828	0.333951	0.325082	0.434173
	0.157398	-0.515652	-0.665682	0.288893		-0.156084	-0.34279	-0.265719	-0.156786		0.157398	-0.34279	-0.265719	0.288893		-0.156084	-0.515652	-0.665682	-0.156786		0.363505	0.218424	0.477996	0.65727		0.663237	0.230097	0.102031	0.0687785
	0.112006	0.0824476	0.680905	0.353282		-0.0488085	0.236299	0.165772	0.344046		0.112006	0.236299	0.165772	0.353282		-0.0488085	0.0824476	0.680905	0.344046		0.488425	0.657434	0.291277	0.142825		0.337324	0.484994	0.255771	0.534185
	0.845001	0.482597	0.5465	0.0675555		0.080113	0.936253	0.627345	-0.108844		0.845001	0.936253	0.5465	-0.108844		0.080113	0.482597	0.627345	0.0675555		0.182235	0.138178	0.191223	0.00173929		0.0348686	0.0823532	0.393283	0.0353232
	0.134361	0.0944877	-0.864608	-0.795035		0.0332138	-0.230014	-1.03531	-0.704656		0.134361	-0.230014	-0.864608	-0.704656		0.0332138	0.0944877	-1.03531	-0.795035		0.253602	0.100312	0.44413	0.178023		0.187119	0.0890753	0.177019	0.0991211
	-0.12694	-0.565011	0.2633	-0.0287191		-0.046221	-0.256344	0.625321	0.065063		-0.12694	-0.256344	0.2633	0.065063		-0.046221	-0.565011	0.625321	-0.0287191		0.355027	0.0949378	0.734002	0.619969		0.00673688	0.20135	0.76042	0.635942
	-0.198751	-0.190659	0.0809124	0.644622		-0.386409	0.878168	-0.107411	-0.396011		-0.198751	0.878168	0.0809124	-0.396011		-0.386409	-0.190659	-0.107411	0.644622		0.0335524	0.260413	1.23385	0.843674		0.284789	0.0232717	3.13366	1.5459
	-0.207058	-0.174775	-0.033545	0.436663		-0.177254	-0.38258	0.0336512	0.357076		-0.207058	-0.38258	0.0336512	0.436663		-0.177254	-0.174775	-0.033545	0.357076		0.105989	0.0690271	0.369182	0.11559		0.221302	0.0558667	0.384198	0.357828
	-0.398235	-0.586328	-0.186647	0.166426		-0.506509	-0.546308	-0.337778	-0.246374		-0.398235	-0.546308	-0.337778	0.166426		-0.506509	-0.586328	-0.186647	-0.246374		0.424005	0.0151008	0.158089	0.198592		0.672563	0.0541559	0.0977228	0.223837
	-0.587033	-0.664114	0.173358	0.247243		-0.604659	-0.505763	-0.118401	-0.142238		-0.587033	-0.505763	-0.118401	0.247243		-0.604659	-0.664114	0.173358	-0.142238		0.37386	0.354312	0.149522	0.207992		0.759207	0.210695	0.037134	0.0384607
	-0.13937	-0.110185	-0.657247	-0.666757		-0.117626	-0.222502	-0.426262	-0.841294		-0.13937	-0.222502	-0.426262	-0.666757		-0.117626	-0.110185	-0.657247	-0.841294		0.0446178	0.0914866	0.28348	0.323944		0.492521	0.0984939	0.298424	0.0975822
	-0.55411	-0.36228	0.406588	1.20873		-0.340262	-0.560664	2.54722	3.04686		-0.55411	-0.560664	2.54722	1.20873		-0.340262	-0.36228	0.406588	3.04686		0.814717	0.351934	0.333284	0.467242		1.09605	0.283295	1.21076	0.894954
	-0.0894274	0.22915	-0.130227	-0.300148		-0.0465754	0.602654	-0.429395	-0.361276		-0.0465754	0.22915	-0.429395	-0.300148		-0.0894274	0.602654	-0.130227	-0.361276		0.306241	0.149921	0.3052	0.0353944		0.397257	0.230286	0.232313	0.0694655
	0.133697	0.363721	-0.227824	-0.0633034		1.1878	0.520671	-0.0383637	-0.201441		1.1878	0.363721	-0.0383637	-0.0633034		0.133697	0.520671	-0.227824	-0.201441		0.262768	0.1311	0.225956	0.18441		0.472286	0.183691	0.187586	0.152122
	-0.604295	-0.604171	0.0617527	-0.168659		-0.713522	-0.3074	0.143723	-0.0703509		-0.713522	-0.604171	0.143723	-0.168659		-0.604295	-0.3074	0.0617527	-0.0703509		0.00877372	0.150521	0.0678	0.273965		0.121922	0.0831689	0.4972	0.160953
	-0.606847	0.0360836	0.793301	0.416611		-0.318871	0.0399519	-0.306643	-0.315388		-0.318871	0.0360836	-0.306643	0.416611		-0.606847	0.0399519	0.793301	-0.315388		0.719612	0.37323	0.452162	0.245531		0.819195	0.647417	0.456268	0.258595
	-0.461431	-0.341053	0.38263	0.226873		-0.433927	-0.506919	0.94097	0.711878		-0.433927	-0.341053	0.94097	0.226873		-0.461431	-0.506919	0.38263	0.711878		0.207289	0.0209779	0.239564	0.237948		0.476781	0.0855103	0.288701	0.132043
	0.591445	-0.246979	0.10879	-0.00981761		0.300123	0.316372	-0.0855237	-0.191168		0.591445	0.316372	-0.0855237	-0.00981761		0.300123	-0.246979	0.10879	-0.191168		2.02389	0.702551	0.101699	0.15491		0.424069	0.3158	0.319659	0.299917
	0.58623	0.388642	-0.396182	-0.253086		0.312489	0.472235	0.0515862	-0.389025		0.58623	0.472235	0.0515862	-0.253086		0.312489	0.388642	-0.396182	-0.389025		0.0065327	0.259239	0.344904	0.415073		0.25406	0.20221	0.531846	0.0249833
	-0.00185966	0.149492	0.295996	-0.19348		0.0993764	-0.0397196	0.115758	-0.112354		-0.00185966	-0.0397196	0.115758	-0.19348		0.0993764	0.149492	0.295996	-0.112354		0.493477	0.254987	0.129567	0.0439692		0.231442	0.214593	0.336837	0.246057
	-0.246705	-0.000406929	-0.432432	-0.214148		0.16746	-0.0672785	-0.435267	-0.536876		-0.246705	-0.0672785	-0.432432	-0.536876		0.16746	-0.000406929	-0.435267	-0.214148		0.179267	0.235574	0.828079	0.502641		0.108067	0.672748	0.262681	0.205029
	0.41264	-0.157858	0.535219	-0.0831007		0.0915905	0.030328	0.344243	-0.181339		0.41264	0.030328	0.535219	-0.181339		0.0915905	-0.157858	0.344243	-0.0831007		0.00837774	0.116178	0.846406	0.599093		0.0579672	0.028526	0.134703	0.726367
	0.214015	0.0621584	-0.0538023	-0.147239		-0.250399	0.100218	-0.353754	-0.21769		0.214015	0.100218	-0.0538023	-0.21769		-0.250399	0.0621584	-0.353754	-0.147239		0.32152	0.298805	0.750768	0.183026		0.096196	0.33092	0.0275492	0.206712
	-0.304784	-0.043033	-0.00875952	-0.38244		-0.310006	0.183927	0.0558715	-0.525898		-0.304784	0.183927	-0.00875952	-0.525898		-0.310006	-0.043033	0.0558715	-0.38244		0.966955	0.336804	0.13968	0.194052		3.30183	0.847768	0.257421	0.411998
	-0.101917	-0.2788	-0.292755	-0.329658		-0.437112	-0.398198	-0.384844	-0.0696974		-0.101917	-0.398198	-0.292755	-0.0696974		-0.437112	-0.2788	-0.384844	-0.329658		0.171268	0.261693	0.105231	0.13522		1.81799	0.982802	0.257093	0.126766
	-0.0482353	0.52537	0.53872	0.972661		0.510975	0.394632	-0.182587	-0.199013		-0.0482353	0.394632	0.53872	-0.199013		0.510975	0.52537	-0.182587	0.972661		1.60307	0.75715	0.1768	2.65171		1.23654	0.692581	0.89555	2.86229
	-0.0571974	-0.0880481	-0.279694	-0.912045		0.429163	0.0339096	-0.142955	-0.443298		-0.0571974	0.0339096	-0.279694	-0.443298		0.429163	-0.0880481	-0.142955	-0.912045		1.33568	0.852754	0.2868	0.206775		1.39076	0.318843	2.19799	0.0503294
	-0.655659	-0.653035	-0.0623693	0.676431		-0.87126	-0.649378	0.0643524	0.176021		-0.655659	-0.649378	-0.0623693	0.176021		-0.87126	-0.653035	0.0643524	0.676431		0.457172	0.507675	0.827651	0.780857		0.469115	0.118079	0.969676	0.20401
	-0.173146	0.523869	-0.0295312	-0.216423		-0.485364	-0.148567	-0.245022	-0.467808		-0.173146	-0.148567	-0.0295312	-0.467808		-0.485364	0.523869	-0.245022	-0.216423		1.14838	1.49903	1.14447	1.08216		0.0308459	0.0119403	0.331962	0.582367
	0.265754	-0.421021	0.0518204	-0.200848		-0.552849	-0.274239	0.209794	-0.343016		0.265754	-0.274239	0.0518204	-0.343016		-0.552849	-0.421021	0.209794	-0.200848		0.099063	0.0257249	0.442608	0.115822		0.306291	0.298355	0.329741	0.0126122
	-0.0165803	0.0126335	-0.0475217	0.403183		-0.066169	0.104916	1.1222	-0.36466		-0.0165803	0.104916	-0.0475217	-0.36466		-0.066169	0.0126335	1.1222	0.403183		0.379273	0.322372	0.022949	0.203631		0.241637	0.0916501	1.37759	0.973971
	-0.665131	-0.59493	1.12924	0.275495		-0.842609	-0.684313	0.990126	1.71479		-0.665131	-0.684313	1.12924	1.71479		-0.842609	-0.59493	0.990126	0.275495		0.462169	0.46641	0.35321	0.694755		0.271819	0.297513	0.395885	0.328423
	-0.246852	-0.178716	-0.652681	-0.84589		0.677701	-0.236117	1.39279	-0.961417		-0.246852	-0.236117	-0.652681	-0.961417		0.677701	-0.178716	1.39279	-0.84589		0.225142	0.199767	0.190355	0.211909		0.808099	0.66365	0.134695	0.00057783
	1.2191	1.28445	-1.10147	-1.11231		-0.0249234	0.462756	-0.0895771	-0.923073		-0.0249234	1.28445	-1.10147	-0.923073		1.2191	0.462756	-0.0895771	-1.11231		1.52085	1.24552	0.117986	0.149399		0.0319016	0.443343	0.178692	0.677133
	0.35917	0.0191954	-0.456347	-0.125582		0.559832	-0.0453412	-0.313592	-0.47253		0.559832	0.0191954	-0.456347	-0.47253		0.35917	-0.0453412	-0.313592	-0.125582		0.226859	0.194493	0.634852	0.440796		0.106294	0.307175	1.1005	0.0898591
	-0.446446	0.0361016	0.349029	-0.0115154		-0.637558	-0.00730008	2.11099	-0.190034		-0.637558	0.0361016	0.349029	-0.190034		-0.446446	-0.00730008	2.11099	-0.0115154		0.000482698	0.0167508	0.275647	0.358461		0.407145	0.259951	0.295895	0.680654
	-0.40899	0.350439	-0.308731	0.557672		-0.0571089	0.158439	0.644049	-0.252847		-0.0571089	0.350439	-0.308731	-0.252847		-0.40899	0.158439	0.644049	0.557672		0.113751	0.0274393	2.57393	2.89865		0.274702	0.0356246	0.587904	1.21921
	0.113358	0.125839	-0.263728	0.260885		0.109938	-0.00990507	-0.299077	-0.265136		0.109938	0.125839	-0.263728	-0.265136		0.113358	-0.00990507	-0.299077	0.260885		0.995708	0.251674	0.369125	0.241421		0.472816	0.652715	0.242133	0.247017
	-0.306133	-0.199156	0.200562	0.493674		0.0115316	-0.351136	1.36077	0.192334		0.0115316	-0.199156	0.200562	0.192334		-0.306133	-0.351136	1.36077	0.493674		0.708254	0.443228	0.604408	0.134007		0.627835	0.435651	0.34822	0.0137293
	0.417986	1.30628	-0.144377	-0.20408		3.04565	1.81564	-0.222852	0.0693287		3.04565	1.30628	-0.222852	-0.20408		0.417986	1.81564	-0.144377	0.0693287		0.330243	0.0550471	0.144877	0.063947		0.112981	0.0282704	0.18569	0.0547641
	-0.267576	-0.257137	-0.507199	-0.574232		0.290282	0.311712	-0.715348	-0.0479607		0.290282	-0.257137	-0.715348	-0.574232		-0.267576	0.311712	-0.507199	-0.0479607		0.751971	0.552042	0.077719	0.337072		0.727992	0.408389	0.274186	0.384398
	1.15365	1.16055	0.294753	0.510486		-0.0164689	0.958546	0.179757	-0.207926		-0.0164689	1.16055	0.179757	0.510486		1.15365	0.958546	0.294753	-0.207926		0.549098	0.185153	0.901661	0.486961		0.494162	0.275396	0.235121	0.363654
	-1.38236	-0.927401	2.25618	3.5497		-1.22488	-0.868844	0.652119	2.89498		-1.22488	-0.927401	0.652119	3.5497		-1.38236	-0.868844	2.25618	2.89498		0.141878	0.0788147	0.0792397	0.332375		0.132395	0.0210545	0.415325	0.235286
	-0.5727	-0.283475	-0.354552	-0.1816		-0.712824	-0.290017	0.101732	0.100889		-0.712824	-0.283475	0.101732	-0.1816		-0.5727	-0.290017	-0.354552	0.100889		0.0238963	0.233394	0.648886	0.340594		0.242397	0.0672482	0.683842	0.266126
	2.55022	0.283015	0.181602	0.818107		0.987067	-0.13843	0.368383	0.994315		0.987067	0.283015	0.368383	0.818107		2.55022	-0.13843	0.181602	0.994315		0.863178	0.932076	0.283269	0.139843		0.30369	0.350103	0.278812	0.448557
	0.0733035	0.18924	0.0131348	-0.0594929		-0.217807	0.324813	-0.291168	-0.286648		-0.217807	0.18924	-0.291168	-0.0594929		0.0733035	0.324813	0.0131348	-0.286648		1.26692	0.646012	0.118704	0.538176		1.64967	1.12584	1.40867	0.512571
	-0.298786	0.576382	0.431171	-0.210109		-0.460527	0.16074	-0.274186	-0.163974		-0.460527	0.576382	0.431171	-0.163974		-0.298786	0.16074	-0.274186	-0.210109		0.640753	0.264919	0.514897	0.239071		0.815322	0.454965	0.0245332	0.221555
	-0.443289	-0.501947	1.59606	0.676898		-0.459715	-0.237148	-0.331936	-0.0484073		-0.459715	-0.501947	1.59606	-0.0484073		-0.443289	-0.237148	-0.331936	0.676898		0.789717	0.526498	0.529035	0.535814		0.682006	0.445898	0.553524	0.344505
	0.193458	-0.146561	-0.329665	0.372012		0.851566	0.822778	0.947461	0.681393		0.851566	-0.146561	-0.329665	0.681393		0.193458	0.822778	0.947461	0.372012		0.701877	0.75802	0.835359	0.412538		0.543089	0.633733	0.824171	0.355474
	1.11185	1.56108	-0.683842	-0.586202		0.124845	0.565603	0.881705	-0.683842		0.124845	1.56108	-0.683842	-0.683842		1.11185	0.565603	0.881705	-0.586202		0.336442	0.00837388	0.681998	0.362987		0.0284564	0.653716	0.386626	0.446802
	-0.278384	0.175025	-0.228006	-0.225643		0.277253	-0.173564	0.483274	-0.405826		0.277253	0.175025	-0.228006	-0.405826		-0.278384	-0.173564	0.483274	-0.225643		1.3836	0.442568	0.628363	0.212118		0.379895	0.307369	0.677852	0.324321
	0.145024	-0.0484892	2.01174	-0.1017		0.733349	0.0789682	-0.214978	1.06074		0.733349	-0.0484892	2.01174	1.06074		0.145024	0.0789682	-0.214978	-0.1017		0.295582	0.160078	0.633622	0.763233		0.0160775	0.00118034	0.8998	1.04035
	0.361297	-0.116683	-0.242073	-0.439976		0.218626	0.305493	-0.359888	0.209246		0.218626	-0.116683	-0.242073	0.209246		0.361297	0.305493	-0.359888	-0.439976		2.42162	1.78604	0.158055	0.0915637		0.179066	0.367874	1.47698	0.0848242
	-0.100686	-0.738427	0.598698	-0.129732		-0.7678	-0.18955	-0.0888537	0.492144		-0.7678	-0.738427	0.598698	0.492144		-0.100686	-0.18955	-0.0888537	-0.129732		0.294259	0.366072	0.702466	0.584692		0.325124	0.300275	0.759774	0.0494809
	-0.613749	-0.585887	-0.63301	-0.370632		-0.470557	-0.684075	-0.35011	-0.765137		-0.470557	-0.585887	-0.63301	-0.765137		-0.613749	-0.684075	-0.35011	-0.370632		1.10914	0.738603	1.47524	0.679802		0.19094	0.565484	0.858141	0.431588
	-0.00160163	-0.239821	-0.0875579	-0.416833		-0.00944008	-0.207167	-0.509722	-0.154768		-0.00944008	-0.239821	-0.509722	-0.416833		-0.00160163	-0.207167	-0.0875579	-0.154768		0.205197	0.512728	0.150723	0.0598723		1.45838	0.65104	0.594581	0.157271
	-0.840571	-0.523169	0.816941	0.327756		-0.483616	-0.590331	-0.182341	0.813981		-0.483616	-0.523169	-0.182341	0.327756		-0.840571	-0.590331	0.816941	0.813981		0.314996	0.150809	0.0152369	0.219856		0.809462	0.0615443	0.424668	0.247528
	-0.269598	-0.381813	0.506692	0.353265		-0.15654	-0.17506	0.440166	0.241909		-0.15654	-0.381813	0.440166	0.353265		-0.269598	-0.17506	0.506692	0.241909		0.402128	0.295262	0.0779207	0.0627693		0.18536	0.0379111	0.170575	0.0788655
	-0.087888	-0.0538063	0.500914	1.23521		-0.020887	-0.0672476	1.08477	0.836499		-0.020887	-0.0538063	0.500914	0.836499		-0.087888	-0.0672476	1.08477	1.23521		0.297732	0.151052	0.714405	0.0154568		0.0764332	0.241482	0.975636	0.118348
	0.101866	-0.18482	0.322386	0.215128		0.19798	-0.0733252	0.654328	1.12084		0.19798	-0.18482	0.322386	1.12084		0.101866	-0.0733252	0.654328	0.215128		0.326027	0.122012	0.171815	0.444708		0.155233	0.0643994	0.130366	0.41655
	-1.01724	-0.481772	-0.795447	-0.695983		-0.0615647	0.344731	-0.388716	-0.755571		-0.0615647	-0.481772	-0.795447	-0.755571		-1.01724	0.344731	-0.388716	-0.695983		0.231153	0.0275991	0.788206	1.05704		0.168547	0.0306136	1.46883	0.904108
	-0.992445	-0.237447	1.64484	0.62607		-2.11861	-1.2609	0.93631	0.673781		-2.11861	-0.237447	1.64484	0.673781		-0.992445	-1.2609	0.93631	0.62607		2.53656	0.595506	0.893426	0.770013		0.117362	0.36942	0.302472	0.0739451
	-0.505517	-0.765034	0.432361	0.200795		-0.694619	-0.669938	-0.135477	0.00895347		-0.694619	-0.765034	-0.135477	0.200795		-0.505517	-0.669938	0.432361	0.00895347		0.802821	0.843273	0.0265738	0.247668		0.0464655	0.657706	0.359615	0.145422
	-0.630358	-0.761998	0.348893	0.134021		-0.943614	-0.548243	0.262881	0.0321998		-0.943614	-0.761998	0.262881	0.134021		-0.630358	-0.548243	0.348893	0.0321998		0.346899	0.202956	0.936423	1.11147		0.0311142	0.203842	0.979975	0.122847
	-0.73577	-0.535463	-0.181319	0.148535		-0.51096	-0.693979	0.521111	0.834303		-0.73577	-0.693979	-0.181319	0.834303		-0.51096	-0.535463	0.521111	0.148535		0.180954	0.198336	0.761294	0.684534		0.386142	0.144342	0.920981	0.815833
	-0.435091	-0.33863	0.138024	0.344584		0.215982	-0.353452	0.290455	0.6869		-0.435091	-0.353452	0.138024	0.6869		0.215982	-0.33863	0.290455	0.344584		0.165175	0.0346951	0.664791	0.809949		0.357491	0.137647	2.07002	0.104954
	1.83606	0.299939	-0.0837711	-0.13472		-0.0946785	-0.0824329	-0.349124	-0.354639		1.83606	-0.0824329	-0.349124	-0.13472		-0.0946785	0.299939	-0.0837711	-0.354639		0.442979	0.367035	0.224925	0.21267		0.253036	0.207902	0.885215	0.25928
	0.311396	-0.171233	0.132477	-0.042809		0.64603	-0.0984167	0.109471	-0.738512		0.64603	-0.171233	0.109471	-0.042809		0.311396	-0.0984167	0.132477	-0.738512		0.627051	0.45792	0.672959	0.751633		0.0447694	0.145941	0.327912	0.508602
	2.03898	2.4708	-0.212538	-0.207441		-0.40638	0.618292	-0.332304	0.14367		-0.40638	2.4708	-0.332304	-0.207441		2.03898	0.618292	-0.212538	0.14367		0.192503	0.0154116	0.0544135	0.0704165		0.250249	0.199579	0.227237	0.0476634
	-0.312869	-0.406163	-0.0187961	-0.18991		-0.705563	-0.281195	-0.31728	-0.0015995		-0.705563	-0.406163	-0.31728	-0.18991		-0.312869	-0.281195	-0.0187961	-0.0015995		0.0990106	0.0840037	0.837439	0.320585		0.579931	0.144897	0.633411	0.279876
	0.711686	0.681925	0.116244	0.162199		0.403269	0.102898	-0.214798	-0.267866		0.403269	0.681925	0.116244	-0.267866		0.711686	0.102898	-0.214798	0.162199		0.335697	0.277896	0.461591	0.355403		0.500324	0.110445	0.217687	0.024965
	0.36343	0.448904	-0.742175	-0.237995		0.965404	1.01275	-1.11014	-0.592299		0.965404	0.448904	-0.742175	-0.592299		0.36343	1.01275	-1.11014	-0.237995		1.27867	0.476321	0.324554	0.321666		0.205458	0.064989	0.161369	0.0226925
	0.205942	0.0755989	0.00110315	-0.147653		0.634374	0.0437678	0.54123	-0.122682		0.634374	0.0755989	0.00110315	-0.122682		0.205942	0.0437678	0.54123	-0.147653		0.860226	0.764926	0.527695	0.44204		0.358222	0.0576329	0.653958	0.100662
	-0.310944	-0.375767	0.282275	-0.332573		-0.0308178	-0.211729	-0.0454624	-0.217267		-0.0308178	-0.375767	0.282275	-0.217267		-0.310944	-0.211729	-0.0454624	-0.332573		0.23183	0.405241	0.095345	0.0215445		0.102346	0.0535494	0.198334	0.242933
	-0.34924	0.194753	0.179204	0.0651051		-0.134056	0.375286	0.155392	0.240129		-0.134056	0.194753	0.179204	0.240129		-0.34924	0.375286	0.155392	0.0651051		0.400377	0.386848	0.290185	0.635762		0.426565	0.276895	1.0761	0.41007
	1.27691	4.17384	-0.0903995	0.578184		0.985065	0.297897	-0.0995403	0.325709		0.985065	4.17384	-0.0903995	0.325709		1.27691	0.297897	-0.0995403	0.578184		0.159196	0.25915	0.80422	0.599183		0.326395	0.0943286	0.581012	0.547795
	0.76569	0.237651	-0.565916	0.303944		-0.169285	-0.208354	-0.316326	0.0933851		-0.169285	0.237651	-0.565916	0.0933851		0.76569	-0.208354	-0.316326	0.303944		0.229883	0.353567	0.0258626	0.0858318		0.463533	0.400405	0.101354	0.0916443
	0.244109	0.624523	0.234481	0.313682		1.38397	0.603068	0.00997123	0.164856		1.38397	0.624523	0.234481	0.164856		0.244109	0.603068	0.00997123	0.313682		0.0468638	0.351244	0.411598	0.262298		0.521272	0.401044	0.385713	0.00053547
	-0.192976	0.570049	-0.0555662	-0.591146		0.186529	-0.104135	0.00488364	-0.181841		-0.192976	-0.104135	-0.0555662	-0.181841		0.186529	0.570049	0.00488364	-0.591146		0.265335	0.027375	0.198882	0.342418		0.305702	0.0371023	0.00427716	0.0750503
	0.0310797	0.198076	-0.249549	-0.37122		0.167636	0.0672336	-0.170384	-0.347037		0.0310797	0.0672336	-0.249549	-0.347037		0.167636	0.198076	-0.170384	-0.37122		0.255483	0.275266	0.66013	0.53559		0.0120742	0.0839829	0.665812	0.293541
	1.83651	1.83742	-0.632123	-0.338757		0.508813	0.182952	-0.539365	-0.486267		1.83651	0.182952	-0.632123	-0.486267		0.508813	1.83742	-0.539365	-0.338757		0.204214	0.106015	0.867252	0.595659		0.316359	0.521306	0.750393	0.511883
	1.95943	2.08944	0.261203	-0.304656		-0.291157	-0.114931	0.0608068	0.0431389		-0.291157	2.08944	0.261203	0.0431389		1.95943	-0.114931	0.0608068	-0.304656		0.0452671	0.0639857	0.223016	0.147421		0.322829	0.119692	0.269156	0.252486
	0.677418	0.294766	0.149896	-0.233178		0.13762	0.182647	0.0404594	-0.481859		0.13762	0.294766	0.149896	-0.481859		0.677418	0.182647	0.0404594	-0.233178		0.424	0.337887	0.388197	0.265111		0.177677	0.101292	0.187773	0.0453674
	-0.180501	-0.426568	0.140762	0.584887		-0.415083	-0.197821	-0.213681	0.566093		-0.415083	-0.426568	0.140762	0.566093		-0.180501	-0.197821	-0.213681	0.584887		0.156678	0.0752201	0.224794	0.636156		0.0363803	0.0261848	0.254201	0.271998
	-0.210849	-0.276344	-0.58197	-1.37799		-0.300298	0.15363	-1.39382	-1.21695		-0.300298	-0.276344	-0.58197	-1.21695		-0.210849	0.15363	-1.39382	-1.37799		0.998629	0.315952	0.797083	0.421703		0.181513	0.176375	0.454724	0.0313583
	0.214054	0.280876	-1.16783	-0.358418		0.217668	0.166427	-0.327226	-0.539628		0.217668	0.280876	-1.16783	-0.539628		0.214054	0.166427	-0.327226	-0.358418		0.240474	0.325631	0.0560982	0.171175		0.397716	0.0479105	1.5001	0.439776
	0.0417283	0.138266	0.26401	-0.302342		-0.301159	0.613395	-0.32303	-0.283603		0.0417283	0.613395	0.26401	-0.283603		-0.301159	0.138266	-0.32303	-0.302342		0.0706517	0.182856	1.04878	0.769052		0.0246553	0.00391354	0.526767	0.0204144
	0.347259	0.614153	1.22339	0.739292		-0.201359	-0.333652	0.988799	0.513299		0.347259	-0.333652	1.22339	0.513299		-0.201359	0.614153	0.988799	0.739292		0.360599	0.464449	0.408689	0.172226		0.210633	0.370578	0.404105	0.153074
	-0.600676	-0.512724	-0.717778	-0.861818		-0.507228	0.0449453	-0.965765	-0.70543		-0.600676	0.0449453	-0.717778	-0.70543		-0.507228	-0.512724	-0.965765	-0.861818		0.486393	0.435478	0.692326	0.590885		0.396856	0.433098	0.493427	0.358836
	-0.0671044	-0.168099	1.19341	0.197247		0.00572474	-0.264441	3.46386	-0.212158		-0.0671044	-0.264441	1.19341	-0.212158		0.00572474	-0.168099	3.46386	0.197247		0.265894	0.323163	0.197944	0.569685		0.114473	0.425588	0.867476	0.220055
	0.052627	0.0996184	-0.00248147	-0.411725		0.165779	-0.0974435	-1.00356	-0.196273		0.165779	0.0996184	-0.00248147	-0.196273		0.052627	-0.0974435	-1.00356	-0.411725		0.342591	0.0497035	0.299025	0.352728		0.411079	0.00912562	0.0360966	0.179317
	-0.0284434	0.272447	-0.73345	-0.778399		-0.469089	0.228824	-0.366	-0.43145		-0.469089	0.272447	-0.73345	-0.43145		-0.0284434	0.228824	-0.366	-0.778399		0.423736	0.428222	0.0214189	0.357314		0.0891515	0.209252	0.12344	0.304201
	-0.242331	-0.0345107	0.467315	-0.51011		-0.375282	-0.0135356	0.217172	-0.344742		-0.375282	-0.0345107	0.467315	-0.344742		-0.242331	-0.0135356	0.217172	-0.51011		0.760256	0.504511	0.0261468	0.600027		0.339636	0.00589562	0.107079	0.172065
	0.438677	0.349625	0.914127	-0.0289345		0.691113	0.786201	0.457878	-0.00135753		0.438677	0.786201	0.914127	-0.00135753		0.691113	0.349625	0.457878	-0.0289345		0.286973	0.231672	0.117171	1.07239		0.700871	0.762282	0.074505	2.94023
	0.0739906	-0.185385	0.721161	0.0852859		-0.139595	-0.278591	-0.0471533	-0.0679165		0.0739906	-0.278591	0.721161	-0.0679165		-0.139595	-0.185385	-0.0471533	0.0852859		0.293959	0.290466	0.278618	0.373341		0.0921672	0.00434258	0.415722	0.0757689
	-0.357415	-0.562038	0.0386734	0.371722		-0.38251	-0.560738	-0.155644	0.0389857		-0.357415	-0.560738	0.0386734	0.0389857		-0.38251	-0.562038	-0.155644	0.371722		0.381912	0.625117	0.233904	0.201851		0.71542	0.600451	0.480715	0.0232243
	-0.853494	-0.469246	0.435464	0.711272		-1.05275	-1.13056	0.324699	-0.354324		-0.853494	-1.13056	0.435464	-0.354324		-1.05275	-0.469246	0.324699	0.711272		0.0775593	0.118922	0.129153	0.564148		0.391835	0.286245	0.728975	0.866254
	-0.0248223	0.161944	0.120594	-0.343524		-0.0783091	0.472759	-0.0521674	-0.473134		-0.0783091	0.161944	0.120594	-0.473134		-0.0248223	0.472759	-0.0521674	-0.343524		1.13547	0.504385	0.0473269	0.37609		0.652209	0.346605	0.419411	0.323664
	-0.23955	-0.57481	0.469466	0.452791		-0.232655	-0.552285	0.689436	0.315469		-0.232655	-0.57481	0.469466	0.315469		-0.23955	-0.552285	0.689436	0.452791				0.443759	0.533707				0.308235	0.382887
	0.0972591	-0.59328	0.247085	0.293574		-0.487875	-0.473219	0.380815	0.329641		-0.487875	-0.59328	0.247085	0.329641		0.0972591	-0.473219	0.380815	0.293574				0.249819	0.0651708				0.225495	0.257561
	0.462855	0.76601	0.842013	-0.294126		0.574198	0.367585	0.734219	-0.473871		0.574198	0.76601	0.842013	-0.473871		0.462855	0.367585	0.734219	-0.294126				0.230471	0.397689				0.370251	0.0785257
	0.773391	0.980698	2.08527	0.716601		0.806734	-0.0077479	0.776345	0.249982		0.773391	-0.0077479	2.08527	0.249982		0.806734	0.980698	0.776345	0.716601				0.237582	0.343656				0.229452	0.276952
	-0.787357	-0.810617	-0.15055	0.425671		0.280017	-0.0675813	-0.106088	0.137735		-0.787357	-0.0675813	-0.15055	0.137735		0.280017	-0.810617	-0.106088	0.425671				0.26651	0.195233				0.520245	0.493264
	-0.262215	-0.236435	-0.331348	0.939595		0.852781	0.13765	0.528158	-0.0594471		-0.262215	0.13765	-0.331348	-0.0594471		0.852781	-0.236435	0.528158	0.939595				0.32033	0.386771				0.414157	0.235877
	-0.447737	-0.251945	-0.0905135	0.0590191		-0.269987	-0.347966	0.00564771	0.0503942		-0.447737	-0.347966	-0.0905135	0.0503942		-0.269987	-0.251945	0.00564771	0.0590191				0.456209	0.305755				0.642974	0.143762
	-0.145311	-0.235709	-0.368764	-0.176476		-0.362779	-0.115321	-0.400913	0.133808		-0.145311	-0.115321	-0.368764	0.133808		-0.362779	-0.235709	-0.400913	-0.176476				0.0471033	0.0834348				0.014994	0.179945
	-0.205834	-0.34819	0.428716	0.0931538		-0.508208	-0.35426	-0.518234	0.494073		-0.205834	-0.35426	0.428716	0.494073		-0.508208	-0.34819	-0.518234	0.0931538				0.0386091	0.0616636				0.204702	0.0464706
	-0.375602	0.163309	0.493504	-0.28662		-0.368232	-0.556728	0.190517	0.459302		-0.375602	-0.556728	0.493504	0.459302		-0.368232	0.163309	0.190517	-0.28662				0.209522	0.118003				0.201067	0.0749886
	-0.186715	0.0394557	0.0978003	0.144541		-0.167889	-0.326905	0.369933	-0.24445		-0.186715	-0.326905	0.0978003	-0.24445		-0.167889	0.0394557	0.369933	0.144541				0.103902	0.155917				0.233021	0.144863
	-0.23625	-0.278343	-0.192574	-0.199923		-0.155116	-0.0274861	0.0227692	-0.124776		-0.23625	-0.0274861	-0.192574	-0.124776		-0.155116	-0.278343	0.0227692	-0.199923				0.554207	0.433112				0.514788	0.411917
	0.0968064	-0.152221	-0.999823	-0.425133		0.356947	-0.330184	-0.737395	-0.491963		0.0968064	-0.330184	-0.999823	-0.491963		0.356947	-0.152221	-0.737395	-0.425133				0.890236	0.311423				0.0674747	0.0658002
	-0.0634961	-0.143696	0.407589	-0.422897		-0.293304	-0.218784	-0.152547	-0.226352		-0.293304	-0.143696	0.407589	-0.226352		-0.0634961	-0.218784	-0.152547	-0.422897				0.144669	0.121353				0.0770303	0.0659474
	-0.0184616	0.482237	-0.505645	-0.213742		0.619812	-0.0895614	0.314373	-0.257969		0.619812	0.482237	-0.505645	-0.257969		-0.0184616	-0.0895614	0.314373	-0.213742				0.632644	0.628423				0.32107	0.137546
	-0.591073	0.394985	-0.0388818	0.114597		0.69301	-0.0245346	0.0203862	-0.395604		0.69301	0.394985	-0.0388818	-0.395604		-0.591073	-0.0245346	0.0203862	0.114597				0.0333738	0.120946				0.503738	0.793641
	0.169078	-0.252898	-0.932968	-0.310697		-0.0253956	-0.0750971	-0.706982	0.369586		-0.0253956	-0.252898	-0.932968	0.369586		0.169078	-0.0750971	-0.706982	-0.310697
	0.631247	0.708786	-1.20823	-0.178885		-0.0325838	0.259509	-0.826835	0.0144962		-0.0325838	0.708786	-1.20823	0.0144962		0.631247	0.259509	-0.826835	-0.178885
	-0.557743	0.488625	-0.450462	0.0038389		-0.0549404	0.24718	0.506209	-0.537915		-0.0549404	0.488625	-0.450462	-0.537915		-0.557743	0.24718	0.506209	0.0038389
	-0.185865	0.182358	-0.373321	-0.252234		0.447173	-0.318121	-0.0910956	-0.700293		0.447173	0.182358	-0.373321	-0.700293		-0.185865	-0.318121	-0.0910956	-0.252234
	-0.441748	-0.40055	0.275365	0.841187		-0.283968	-0.40802	0.593726	0.362065		-0.283968	-0.40055	0.593726	0.841187		-0.441748	-0.40802	0.275365	0.362065
	-0.577638	-0.372738	0.622908	0.721952		-0.510186	-0.414217	0.10402	0.293974		-0.577638	-0.414217	0.10402	0.721952		-0.510186	-0.372738	0.622908	0.293974
	0.334895	0.233984	-0.0368967	0.284441		0.454243	0.0479782	1.14094	1.21591		0.334895	0.0479782	1.14094	0.284441		0.454243	0.233984	-0.0368967	1.21591
	-0.305702	-0.243099	-1.16651	-0.637636		0.202111	-0.457054	-0.523036	-0.330866		0.202111	-0.243099	-0.523036	-0.637636		-0.305702	-0.457054	-1.16651	-0.330866
	-0.501573	-0.244089	-0.479519	0.130043		0.120305	-0.243487	0.274336	0.238478		0.120305	-0.244089	0.274336	0.130043		-0.501573	-0.243487	-0.479519	0.238478
	1.8179	-0.0225896	-0.588888	-0.715226		0.00494462	-0.353546	-0.798179	-0.295119		1.8179	-0.353546	-0.798179	-0.715226		0.00494462	-0.0225896	-0.588888	-0.295119
	0.12513	0.228854	-0.0811731	1.06146		0.535683	0.723015	0.991714	0.506597		0.12513	0.723015	0.991714	1.06146		0.535683	0.228854	-0.0811731	0.506597
	-0.239852	-0.44323	-0.212465	-0.356841		-0.0947967	-0.367042	-0.306528	0.225879		-0.0947967	-0.44323	-0.306528	-0.356841		-0.239852	-0.367042	-0.212465	0.225879
	-0.444484	-0.667261	0.254997	0.256671		-0.847629	-0.589848	0.309556	0.245545		-0.847629	-0.667261	0.254997	0.245545		-0.444484	-0.589848	0.309556	0.256671
	0.253293	-0.54814	0.204295	-0.0839246		-0.445705	-0.268357	0.270241	-0.281767		-0.445705	-0.54814	0.204295	-0.281767		0.253293	-0.268357	0.270241	-0.0839246
	0.832124	-0.218196	0.170138	-0.196851		0.543943	0.835265	0.384852	0.760089		0.543943	-0.218196	0.170138	0.760089		0.832124	0.835265	0.384852	-0.196851
	-0.138153	0.355671	-0.571715	0.474856		2.47459	5.03327	-0.0324268	0.732543		-0.138153	5.03327	-0.571715	0.732543		2.47459	0.355671	-0.0324268	0.474856
	3.24764	6.58682	0.246388	0.499346		0.954418	2.21437	0.238373	0.183463		0.954418	6.58682	0.246388	0.183463		3.24764	2.21437	0.238373	0.499346
	-0.449639	0.756975	-0.0405345	-0.615903		-0.465754	0.316969	-0.329223	-0.342649		-0.465754	0.756975	-0.0405345	-0.342649		-0.449639	0.316969	-0.329223	-0.615903
	-0.326541	-0.269672	-0.492591	-0.567468		-0.170253	0.0635479	0.177543	-0.401958		-0.170253	-0.269672	-0.492591	-0.401958		-0.326541	0.0635479	0.177543	-0.567468
			0.247516	-0.114913				0.00445453	0.191319				0.247516	0.191319				0.00445453	-0.114913
			0.278574	0.350244				0.105504	0.518778				0.278574	0.518778				0.105504	0.350244
			-0.57919	-0.30079				-0.689639	-0.111104				-0.689639	-0.30079				-0.57919	-0.111104
			0.393333	-0.135703				-0.131773	0.178553				-0.131773	-0.135703				0.393333	0.178553
			-0.527425	-0.10968				-0.497365	-0.0941963				-0.497365	-0.10968				-0.527425	-0.0941963
			-0.366833	-0.60614				-0.769454	-0.58392				-0.769454	-0.60614				-0.366833	-0.58392
			0.27063	-0.286133				-0.279419	-0.748954				-0.279419	-0.286133				0.27063	-0.748954
			1.267	-0.0524639				0.294153	0.590201				0.294153	-0.0524639				1.267	0.590201
			-0.131095	-0.470695				-0.333898	-0.405096				-0.131095	-0.405096				-0.333898	-0.470695
			-0.0556596	0.328567				0.828049	0.50825				-0.0556596	0.50825				0.828049	0.328567
			0.206353	0.630777				0.209557	0.781921				0.206353	0.781921				0.209557	0.630777
			0.315722	-0.525608				0.0183822	0.154597				0.315722	0.154597				0.0183822	-0.525608
			-0.333626	0.343168				-0.212002	0.344167				-0.333626	0.344167				-0.212002	0.343168
			-0.00327433	0.0373234				0.0217373	0.316548				-0.00327433	0.316548				0.0217373	0.0373234
			-0.0266972	0.149078				0.109668	0.367376				-0.0266972	0.367376				0.109668	0.149078
			-0.247206	-0.456997				-0.264113	-0.289803				-0.247206	-0.289803				-0.264113	-0.456997
			-0.547117	-0.0250563				0.271861	-0.00392971				-0.547117	-0.00392971				0.271861	-0.0250563
			-0.286521	-0.0962494				-0.134816	-0.0241592				-0.286521	-0.0241592				-0.134816	-0.0962494
			-0.300108	-0.104258				-0.0996277	-0.213003				-0.0996277	-0.104258				-0.300108	-0.213003
			0.154419	0.117202				0.220825	-0.0733539				0.220825	0.117202				0.154419	-0.0733539
			-0.598686	-0.436679				-0.486662	-0.419072				-0.486662	-0.436679				-0.598686	-0.419072
			0.443339	0.528082				-0.0435057	-0.352407				-0.0435057	0.528082				0.443339	-0.352407
			0.326324	0.0864044				0.085918	-0.365825				0.085918	0.0864044				0.326324	-0.365825
			0.526492	0.776921				0.0585173	0.663005				0.0585173	0.776921				0.526492	0.663005
			-0.163616	-0.0710786				-0.86279	-0.443856				-0.86279	-0.0710786				-0.163616	-0.443856
