# Supplementary material for: Suppressed prefrontal neuronal firing variability and impaired social representation in IRSp53-mutant mice
Source: eLife. 2022 Nov 1;11:e74998. doi: 10.7554/eLife.74998 (PMC9662818; doi:10.7554/eLife.74998)
Supplement: Figure 4—figure supplement 1—source data 1. — The excel file contains the numerical data used to generate Figure 4—figure supplement 1A–E. [file elife-74998-fig4-figsupp1-data1.xlsx]

## Sheet: Fig4_S1
	Fig 4_S1A	Second S-O				Fig 4_S1B_Left				Fig 4_S1B_Right			Fig 4_S1C_Left				Fig 4_S1C_Right			Fig 4_S1D_Left				Fig 4_S1D_Right			Fig 4_S1E_Left
	WT		KO			Decoding accuracy (%)	WT	KO		WT	KO		Decoding accuracy (%)	WT	KO		WT	KO		Decoding accuracy (%)	WT	KO		WT	KO		# of neurons	Decoding accuracy (%)
	FR social	FR object	FR social	FR object		0-5	0	0		63.8	59.55		0-5	0	0		73.65	58.35		0-5	0	0		67.55	60.75			WT
	0.168979	0.434519	0.580298	0.201138		5-10	0	0		64.5	57.35		5-10	0	0		73.55	70.1		5-10	0	0		73.4611	78.85		1	80	35	100	50	60	65	60	30	35	35	70	65	60	50	70	60	45	55	45	55	50	40
	12.5011	15.1697	0.635303	1.01178		10-15	0	0		65.45	72.55		10-15	0	0		72.85	60.95		10-15	0	0		62.25	69.85		2	40	30	70	60	60	60	50	75	30	70	75	100	65	55	35	55	70	65	70	50	35	60
	5.2461	3.40146	5.08876	5.95245		15-20	0	0		60.6	69.6		15-20	0	0		70.9	65.4889		15-20	0	0		65	64.7		3	55	90	60	60	60	55	100	70	85	65	80	80	65	70	70	80	60	90	55	75	70	50
	2.38517	2.60858	1.96854	0.472077		20-25	0	0		62.5	71.85		20-25	0	0		81.65	58.05		20-25	0	0		83.8	61.9		4	40	55	60	75	85	65	60	70	100	60	30	90	75	75	45	100	100	80	60	90	50	55
	5.30378	2.15049	1.76991	3.97263		25-30	0	0		62.85	66.25		25-30	0	0		64.2	78.2		25-30	0	0		57.75	60.7		5	80	80	100	90	65	70	75	65	60	85	90	90	60	50	50	70	75	80	70	60	55	85
	2.19081	3.86469	2.02039	2.31453		30-35	0	0		59.45	65.65		30-35	0	0		66.05	59.2		30-35	0	0.0149254		67.4	56.6		6	60	85	50	60	50	60	70	100	65	85	75	80	55	75	40	70	80	80	60	65	50	90
	0.793725	0.748089	1.21059	1.12825		35-40	0.00588235	0.0443038		60.95	66.8		35-40	0.0275229	0		73.8	77.4		35-40	0.0425532	0.0298507		60.3	55.95		7	100	70	90	95	40	85	65	100	80	70	60	100	80	75	50	65	80	65	65	65	60	65
	0.104113	0.530926	0.996852	1.17898		40-45	0.1	0.107595		66.15	55.25		40-45	0.110092	0.12069		60.1	65.5		40-45	0.106383	0.0746269		56.1	61.55		8	80	70	60	65	50	85	80	100	60	65	30	70	75	70	65	100	55	65	60	100	50	60
	2.82621	2.70519	10.4499	8.89478		45-50	0.323529	0.246835		61.25	60		45-50	0.110092	0.12069		73	70.5		45-50	0.255319	0.253731		63	61.65		9	95	45	75	80	55	85	85	80	70	50	80	95	85	50	50	75	60	100	85	75	90	80
	0.231539	0.41603	0.352388	0.711286		50-55	0.2	0.21519		63	55.1		50-55	0.174312	0.224138		74.35	69.95		50-55	0.138298	0.179104		55.05	58		10	70	65	75	75	55	100	70	90	80	60	80	95	95	65	85	60	85	65	70	70	80	100
	0.180574	2.11041	8.32902	7.33071		55-60	0.129412	0.0949367		65.9	63.45		55-60	0.12844	0.137931		75.55	67.15		55-60	0.12766	0.104478		65.05	57.7		11	55	100	100	90	50	60	80	100	75	60	70	65	50	55	60	50	100	65	70	60	90	55
	1.16066	0.591046	1.93199	0.104981		60-65	0.0941176	0.132911		57.55	84.05		60-65	0.0550459	0.155172		66.8	68.3		60-65	0.117021	0.208955		65.25	75.45		12	100	55	75	90	60	80	95	100	60	85	100	65	65	45	100	75	80	70	75	90	95	65
	0.361698	0.845368	6.38603	6.08465		65-70	0.0647059	0.0822785		61.15	60.25		65-70	0.0733945	0.155172		55.25	66.7		65-70	0.0851064	0.0447761		60.65	62.7		13	65	65	80	70	45	100	90	65	95	60	85	100	70	90	85	65	45	80	25	100	75	95
	4.49164	2.55937	6.24928	6.45947		70-75	0.0352941	0.0506329		58.4333	60.5		70-75	0.165138	0.0344828		76.3	80.3		70-75	0.0425532	0.0149254		61.7	76.45		14	70	90	70	85	65	80	80	85	65	85	65	75	85	85	70	85	90	100	100	70	70	65
	4.61219	4.87879	6.1009	2.86383		75-80	0.0294118	0.0189873		59.2	65.05		75-80	0.0550459	0.0344828		55.3	60.5		75-80	0.0212766	0.0447761		56.85	66.25		15	80	85	85	100	80	85	80	65	55	90	100	60	75	80	80	65	75	95	65	85	70	100
	4.05922	2.72996	0.512797	0.180014		80-85	0.0176471	0.00632911		56.2	68.95		80-85	0.0642202	0.0172414		89.35	56.2		80-85	0.0212766	0		56.7	87.2		16	85	55	85	75	60	80	100	85	100	80	100	65	30	50	100	85	75	85	75	35	100	100
	9.32666	12.6364	1.89641	3.1911		85-90	0	0		58.05	63.6		85-90	0.0275229	0		74.0667	64.05		85-90	0.0212766	0.0149254		62.75	61.9		17	80	75	80	85	100	55	100	80	100	100	100	100	95	100	55	85	70	35	100	85	90	75
	5.35774	2.29403	3.87515	4.16411		90-95	0	0		72.4	69.55		90-95	0.00917431	0		56.75	65.9		90-95	0.0106383	0.0149254		61.5	60.1		18	85	70	85	85	85	80	100	60	65	70	80	90	85	90	75	85	80	95	45	95	100	90
	1.56387	1.63634	6.50292	8.9415		95-100	0	0		65.05	60.5		95-100	0	0		82.7	56.1		95-100	0.0106383	0		58.1	55.85		19	80	75	100	85	80	80	100	70	100	100	55	95	75	100	100	95	70	100	85	100	100	80
	1.36423	0.393656	0.308463	0.426261						55.05	69.35						57.8	61.45						55.7	73.65		20	85	85	95	85	100	100	85	75	55	90	100	90	90	80	90	85	100	80	95	60	60	70
	0.325172	0.534167	1.4878	5.20472						56.15	63.7						83.45	68.45						59.5	92		21	100	50	75	100	100	75	75	100	100	75	65	80	65	65	100	85	70	90	100	100	100	70
	9.94789	10.1855	0.407636	0.308505						73.2	66.5						70.35	61.75						73	55.4		22	95	100	85	65	85	100	100	100	95	85	100	90	65	65	65	80	85	80	75	80	50	85
	0.830022	0.390424	2.95796	2.07253						67.8	69.85						57.9	55.4						58.6	60.95		23	100	90	75	45	80	85	100	100	55	75	100	45	65	55	100	100	70	100	90	90	90	70
	0.370248	0.706757	0.33647	0.187624						69.9	61.6						80.3	60.8						59.7	64.7		24	90	75	100	95	95	55	75	95	80	45	70	55	55	65	100	90	100	100	95	100	95	80
	3.08944	2.25945	1.01868	1.92812						75.45	55.8						79.25	58.5						65.15	64.6		25	90	80	50	100	75	95	80	95	100	85	65	70	100	95	75	100	100	60	75	75	50	90
	12.5172	10.3147	2.13408	1.31649						66.75	66.1						58.1	63.2						66.45	61.45		26	80	80	75	85	80	90	75	60	100	100	95	85	75	80	100	95	95	75	85	85	65	70
	3.4254	2.10668	1.37703	0.64902						79.65	58.25						63.85	63.5						77.55	55.3		27	95	100	95	30	100	95	85	60	80	85	100	65	85	100	60	100	85	95	90	100	60	100
	10.296	11.4155	0	0.347837						58.25	64.65						72.05	61.85						92.6	64.4		28	80	100	100	85	85	90	60	75	100	100	85	80	85	40	100	80	100	100	100	70	95	80
	10.6243	11.1631	0.570857	1.64197						63	61.9						73.6	57.4						69.4	68.25		29	90	90	90	90	55	95	75	95	80	100	100	75	85	100	100	100	60	80	95	100	90	100
	2.39406	2.21941	17.1971	6.27306						74.25	71.5						82.65	66.6						87.45			30	100	100	65	90	100	75	100	65	70	100	85	80	85	100	60	100	100	100	80	80	75	100
	1.56816	2.59903	0.705074	1.05089						58.35	60						68.65							63.45			31	100	60	85	100	85	100	90	95	85	100	65	95	95	80	100	85	65	100	85	90	75	80
	2.35509	4.23613	1.17468	0.726999						65.85	74.35						71.7							78.3			32	70	95	90	90	90	95	100	100	85	70	85	75	100	75	85	95	90	80	90	80	100	100
	0.37184	1.21739	1.81636	1.83929						61.1	73						63.55							100			33	100	95	80	85	70	100	85	100	75	95	95	60	100	100	95	85	95	90	95	90	95	60
	0.615358	1.18581	0.627321	0.225968						55.8	56.4						57.25							59.25			34	80	95	70	100	60	95	75	65	95	95	100	95	90	85	90	90	85	85	85	100	90	100
	1.36897	0.497196	3.85485	1.05412						72.45	58.4						56.75							62.85			35	95	100	100	100	100	75	90	85	90	90	100	100	100	80	95	100	100	75	100	100	100	75
	0.0516121	2.40261	1.08037	1.04222						55.6111	61.15						68.85							70.7			36	100	100	100	100	100	100	85	95	95	80	60	100	100	100	100	95	100	100	80	100	80	85
	0.424938	0.815939	5.68399	3.86322						65.7	69.45						66.5							61.9			37	100	100	60	100	95	95	100	85	85	100	85	70	90	100	95	85	100	95	85	100	100	80
	0.634683	0.220729	2.35282	1.10652						57.05	63.1						58.55							63.65			38	90	100	95	100	95	100	100	100	70	95	95	100	100	100	85	100	90	100	100	85	70	90
	0.641453	0.533043	0.726169	1.74364						71.85	57.25						65.75							56.3			39	100	100	100	95	95	95	100	80	100	100	85	45	100	95	75	90	100	100	90	100	95	90
	3.12537	4.98256	1.18395	0.974978						55.7	56.15						68.35							88.05			40	85	90	100	65	85	100	100	100	100	100	75	100	95	90	85	100	80	85	100	80	95	90
	2.41509	2.70666	3.30428	3.16437						56.3	55.25						56.85							81.1			41	100	85	100	100	100	80	100	100	100	85	80	100	100	100	100	80	80	90	90	100	100	60
	5.7586	6.4059	6.87199	11.0611						75.35	71.9						58.2							73.5			42	100	100	90	100	100	90	75	100	100	85	95	95	95	100	100	100	100	95	75	95	90	100
	1.49806	1.92265	1.93398	1.82499						55.85	61.3						58.15										43	100	100	100	80	100	90	100	70	90	95	90	95	100	100	100	100	100	90	100	100	95	100
	0.885376	1.63626	2.29543	0.753995						60.85	60.65						59.5										44	80	95	100	95	100	95	100	100	100	65	100	75	90	100	100	60	100	95	100	100	85	85
	5.57924	6.23313	2.05067	2.40583						59.55	79.85						74.75										45	100	65	100	100	95	70	80	100	85	80	95	90	95	85	100	90	100	100	85	100	85	100
	6.95735	7.50361	4.78268	2.93316						64.85	74.65						70.35										46	100	95	95	100	100	100	100	95	75	100	100	85	80	95	90	90	95	100	85	100	65	80
	3.43898	0.0587001	0.849203	0.523394						58.05	64.3						86.75										47	80	100	90	90	75	90	95	100	85	100	85	100	100	100	100	100	100	80	100	90	100	60
	0.952295	0.994438	1.16022	1.18297						63.55	62.65						76.1										48	100	95	100	100	100	75	70	100	95	100	100	100	85	95	100	100	100	100	85	100	100	90
	8.93645	14.9545	2.52491	2.42507						56.4	76.1						71.7										49	100	100	100	100	100	90	100	100	100	100	100	100	100	95	80	100	90	100	95	100	95	80
	4.58989	3.82146	1.12084	0.460747						71.85	60.1						82.8										50	100	90	100	100	100	100	100	95	95	100	100	100	80	100	100	100	100	85	100	100	90	100
	6.29954	5.61202	16.2661	14.4122						80.75	63.2						75.2										51	95	100	100	100	95	95	75	85	100	100	80	100	95	100	90	75	90	85	90	90	100	100
	0.549074	0.350352	6.36978	2.09311						58.65	75.55						61.15										52	100	100	100	100	100	100	100	95	95	95	90	85	100	90	100	95	90	90	100	100	100	100
	0.437165	0.637744	6.82581	6.42991						75.2	62.55						73.95										53	90	85	100	100	75	100	100	75	100	100	100	100	100	95	100	95	100	100	100	100	100	100
	0.613513	1.00042	1.67849	1.97034						56.65	64.1						70.25										54	100	75	100	95	85	100	100	90	100	100	95	100	100	100	100	100	75	100	100	95	90	100
	1.57338	1.31895	7.02724	6.65982						83.8	66.5						84.8										55	85	100	90	85	95	100	90	100	100	100	100	90	90	100	100	100	90	100	60	100	100	100
	0.828089	1.28577	0.578798	1.04113						66.75	57.65						92.05										56	100	100	100	100	100	100	100	100	85	90	80	95	90	100	95	90	100	100	85	100	95	100
	0.621202	0.972749	1.02017	1.06767						63.75	72.9						68.3										57	100	100	100	100	95	80	95	100	100	100	100	95	80	100	100	100	95	100	90	70	100	100
	6.14098	5.9961	4.41868	2.92035						55.6	60.95						74.85										58	100	100	95	100	100	100	100	95	100	85	85	100	85	70	100	100	100	100	100	100	100	100
	0.177068	0.679926	0.281065	0.0656268						62.7							85.75										59	100	100	100	100	100	85	100	100	100	95	100	100	95	100	100	100	100	100	100	100	100	100
	4.63009	3.88001	1.30028	1.72424						79.2							62.65										60	100	90	100	100	100	100	100	70	100	90	100	80	100	100	100	100	100	100	100	100	90	100
	1.21429	2.65075	11.0226	8.76932						67.5							56.1										61	100	100	100	100	100	100	100	100	75	100	100	85	95	100	100	95	70	85	100	100	95	100
	1.52316	2.76433	3.26668	1.74851						84.45							77.8										62	100	100	85	100	100	85	100	100	100	95	100	100	95	100	100	100	100	100	100	95	100	85
	8.65113	8.45158	3.77705	2.82705																							63	100	100	100	100	100	100	95	100	100	95	100	100	100	100	100	95	100	95	100	100	95	95
	9.53434	9.81877	1.31324	1.53436																							64	100	100	95	100	75	95	100	100	100	100	100	100	100	100	100	100	100	100	100	100	100	100
	0.634138	0.257188	3.71689	3.90088																							65	100	95	100	100	85	100	95	100	85	100	100	100	100	100	100	95	100	100	95	100	95	100
	0.183173	0.169199	0.658878	0.878698																							66	100	100	100	100	100	100	90	100	100	100	90	100	100	100	100	90	100	100	100	80	100	100
	0.270436	1.79724	7.93943	8.13177																							67	100	90	100	100	100	100	100	100	90	100	100	100	85	100	100	100	100	95	100	95	100	100
	0.589169	0.759985	2.53617	1.00555																							68	100	100	100	100	90	100	100	100	100	90	100	100	100	100	100	80	100	100	100	100	100	100
	3.78924	6.56202	0.911672	2.50226																							69	100	100	100	100	100	100	90	100	85	100	95	100	100	100	95	100	100	100	100	100	100	100
	23.0216	21.9266	2.9069	1.67536																							70	100	100	90	100	95	100	100	100	95	100	100	100	100	100	100	95	100	100	100	95	100	100
	1.00652	1.4596	1.2504	1.16383																							71	100	100	100	95	100	95	100	100	100	90	100	100	100	100	100	100	100	95	100	100	100	90
	7.4131	7.60108	0.465299	0.664723																							72	100	100	100	95	100	100	100	100	100	100	100	100	100	100	100	100	100	100	100	100	100	100
	0.814407	1.49231	2.75187	2.8154																							73	100	90	100	100	100	100	100	100	100	100	100	100	100	100	80	100	100	100	100	100	100	100
	2.30939	2.69205	7.03978	6.73336																							74	100	100	100	100	100	100	100	90	100	100	100	100	100	95	95	95	100	100	90	100	100	100
	2.05178	0.823685	2.19606	2.00567																							75	100	100	100	95	100	90	100	95	100	100	100	100	100	100	100	100	100	100	100	100	100	85
	1.07006	0.411085	0.660057	0.625048																							76	100	100	80	100	100	100	100	100	100	100	100	100	100	100	80	100	95	100	100	100	100	100
	1.35674	1.02023	1.77519	1.96003																							77	100	100	100	100	100	100	100	100	95	100	100	100	100	100	100	100	100	100	100	100	100	95
	4.35694	3.52926	2.41645	2.93995																							78	100	100	100	100	100	100	100	100	90	100	100	100	100	100	100	100	100	100	100	100	95	100
	8.92691	8.23256	0.204567	0.26268																							79	100	100	100	100	90	95	100	100	100	100	100	100	100	100	100	95	95	100	100	100	100	100
	3.56275	1.53715	6.12614	6.26052																							80	100	100	100	100	100	100	100	100	100	100	100	100	100	100	100	100	100	100	100	100	100	95
	2.98372	3.05347	0.267198	0.138343																							81	100	100	100	90	100	100	100	100	100	100	100	100	100	100	100	100	100	100	100	100	100	100
	4.34581	5.19591	2.18643	2.71814																							82	100	100	100	100	100	100	100	100	100	100	100	100	100	100	100	100	100	100	100	100	100	100
	0.690532	0.443854	1.81853	3.19607																							83	100	100	100	100	100	100	100	100	100	100	100	100	100	100	100	75	100	100	95	100	100	100
	1.2657	1.2798	5.54278	5.56346																							84	100	95	100	100	100	100	100	90	100	100	100	100	100	100	100	100	100	100	100	100	100	100
	0.465098	0.322533	12.2524	9.10626																							85	100	100	100	95	100	100	100	100	100	95	100	100	95	100	100	90	100	100	100	100	100	100
	1.25018	0.824851	0.919872	0.975376																							86	100	100	100	100	100	100	100	100	100	100	100	100	100	100	100	100	100	100	100	100	95	100
	0.892749	0.991417	6.93254	6.87985																							87	100	100	100	100	100	100	100	100	100	100	100	100	100	100	100	100	100	100	100	100	100	100
	1.43325	0.948927	0.767622	0.867072																							88	100	100	100	100	100	95	100	100	100	100	100	100	100	100	95	100	100	100	100	100	100	100
	0.0255043	0.29008	1.75772	2.68328																							89	100	100	100	100	100	100	100	100	100	100	100	100	100	100	100	100	100	100	100	100	100	100
	0.676776	1.12462	5.42587	8.68072																							90	100	100	100	100	100	100	100	100	100	100	100	100	100	100	100	100	100	100	100	100	100	100
	7.25262	5.67009	0.83508	0.540981																							91	100	100	100	100	100	100	100	100	100	100	100	95	100	100	100	100	100	100	85	100	100	100
	1.07951	0.975407	2.05155	1.32912																							92	100	100	100	100	100	100	100	100	100	100	100	100	100	100	100	100	100	100	100	100	100	100
	4.82126	5.47069	3.14542	2.66097																							93	100	100	100	100	100	100	100	100	100	100	100	100	100	100	100	100	100	100	100	100	100	100
	3.94632	3.00408	13.5077	13.3658																							94	100	100	100	100	100	95	100	100	100	100	100	100	100	100	100	100	100	100	100	100	100	100
	0.706681	0.56069	1.3706	1.16127
	1.53743	1.09614	0.815414	0.789321
	0.726716	0.604703	9.28179	12.3012
	1.60111	0.741312	0.974068	1.45351
	3.8958	3.97393	6.01915	6.28806
	4.87409	9.36804	0.842626	0.573038
	2.08651	0.818115	0.619077	0.94482
	1.58205	1.46399	2.10399	1.68361
	1.33127	1.7601	5.61096	6.61712
	6.77776	6.91479	0.45842	0.372141
	5.28748	3.88374	2.83427	2.49977
	0.497827	1.47097	9.44202	9.44607
	1.91163	4.01191	3.27429	0.316486
	0.477884	0.503893	1.07615	1.07449
	1.23716	0.63846	1.05926	0.614507
	0.775031	0.635068	6.83903	6.38458
	1.13147	1.13196	6.55742	5.22484
	10.8146	9.35995	3.36963	3.79528
	0.41753	0.661591	0.746782	0.537484
	2.88346	3.61791	1.37062	0.831781
	0.726554	1.51829	5.42517	6.62907
	2.77722	2.89647	2.0386	0.779806
	0.91655	0.845356	1.24587	1.24557
	2.89682	6.04659	0.868297	0.993576
	0.90192	0.994529	0.870871	0.301523
	0.543276	0.436522	4.70675	6.50233
	0.45459	0.385386	2.75316	2.93984
	0.309471	0.514313	0.297233	0.292882
	8.72647	8.88014	5.11433	6.00515
	18.601	18.7833	0.212056	0.52359
	4.24189	4.22312	2.17852	1.78271
	2.95408	1.86113	0.91891	0.40297
	0.544832	0.564926	4.92485	5.00514
	6.97611	7.27648	0.903022	0.581939
	2.90828	2.30479	3.02174	1.72066
	1.04241	2.12183	1.29086	2.69767
	8.19767	8.44089	2.85815	0.196131
	1.79269	2.34151	0.406026	1.33893
	0.539645	0.915443	1.16838	1.51505
	3.45579	3.58947	2.5551	2.23562
	5.17607	2.87291	1.72877	0.419072
	5.82374	5.51778	0.184423	0.338516
	3.91466	3.15319	1.36322	0.674338
	0.479076	0.316042	1.15249	0.87188
	1.65454	1.02001	1.7766	1.50747
	2.0051	2.92908	5.35925	4.2464
	0.971061	3.21105	2.11738	3.41727
	4.96924	5.3056	16.0065	13.8522
	11.5372	9.82429	7.42564	6.23206
	2.04691	3.57602	1.56282	1.51747
	0.616639	0.0804096	2.25997	2.15805
	1.67063	1.815	1.60885	1.94826
	4.79637	4.81364	3.50392	1.78439
	4.22701	5.1591	1.59544	0.140704
	1.98048	6.46042	2.05033	3.44602
	18.2761	11.668	1.18923	0
	3.46887	2.30985	0.613231	0.454583
	0.437572	0.65887	1.50892	3.08369
	1.36919	2.70615	6.11366	9.06471
	18.8757	16.7081	1.67898	2.11297
	2.40407	1.67777	8.8527	7.86173
	1.41589	1.34332	3.14953	7.12335
	2.92973	2.3468	4.55127	2.87493
	13.8221	12.8181	3.87775	4.84831
	1.0397	0.672338	5.33259	4.92533
	0.365082	0.34713	1.66417	2.21707
	8.23032	11.7774	0.52136	0.231886
	18.7882	11.5684	14.4821	15.1548
	8.28604	7.71188	0.616371	0.3591
	4.7308	6.30012	14.5297	14.9576
	7.9041	7.46297	0.628415	0.501752
	1.11345	0.595854	0.72397	0.741884
	1.62377	1.64759	1.02993	0.613501
	0.443358	0.842185	22.2122	19.4307
	12.9975	6.12026	0.549614	1.17965
	5.01569	4.35641	2.83042	3.49024
	1.55425	1.09313	1.06515	0.398188
	0.760696	0.709029	8.0874	8.31637
	0.525363	0.690356	1.59449	1.59316
	1.08176	1.15938	1.29098	1.07687
	1.91997	2.21333	3.86879	4.38132
	3.82252	0.759503	2.09423	1.17738
	1.87332	1.05552	2.13751	1.85921
	1.09799	0.933214	1.13212	1.2824
	1.39969	0.707168	2.20334	3.29831
	0.996431	0.397544	1.64074	2.23328
	3.50668	1.78083	2.75561	3.36943
	15.9056	7.79877	13.1277	17.7729
	0.636098	0.782826	4.48307	2.5132
	0.245945	1.41288	0.949222	1.3455
	0.356786	0.823226	0.325305	1.50116
	0.938419	0.82089	3.58968	4.16825
	1.58951	3.21481	0.136805	0.420819
	3.20998	0.814222	2.27967	1.95004
	8.91134	11.3945	0.485292	0.733795
	0.443893	0.163533	0.87089	0.225077
	5.43626	3.18076	4.74022	6.82126
	5.18826	3.32257	0.825255	1.49097
	0.534798	0.627206	2.84976	3.17566
	1.47685	3.74458	1.4873	1.57857
	0.947266	0.73912	0.906245	0.944031
	3.67191	3.29439	4.30685	1.97765
	8.08696	5.1212	16.6468	15.3872
	5.47701	4.92485	1.87218	2.5214
	4.84431	4.08039	34.7697	37.0802
	10.0334	10.5221	7.63213	6.74701
	4.02134	5.19627	3.13088	3.13757
	2.27755	0.726556	8.4176	4.53676
	1.29105	3.58096	2.14388	4.09127
	2.21829	3.1353	1.64843	1.12212
	1.20357	1.12677	1.43592	1.78796
	0.794238	1.28175	0.383681	1.64348
	0.716917	1.04323	2.40755	2.67856
	2.96997	2.13178	7.31905	8.63496
	0.938587	0.571549	2.13467	1.40457
	0.587196	1.54219	4.60095	4.61242
	0.643205	1.23312	6.48043	5.6287
	1.6774	1.01502	0.686695	1.20959
	1.34348	0.0442195	1.07004	1.56133
	4.43273	2.25586	5.7543	3.53961
	3.99902	3.581	3.96992	5.03466
	1.56467	1.40862	6.50757	6.27697
	4.87145	4.96121	2.79608	1.50283
	1.70849	0.187782	7.3366	7.64443
	3.01618	3.12441	5.98754	5.28021
	1.84828	1.68798	1.45551	1.77174
	0.542765	0.946443	2.52179	2.52007
	5.19867	2.82156	11.9703	12.9582
	2.62839	2.91723	5.90434	6.06882
	2.68835	2.23064	0.393515	1.07949
	2.92375	4.14563	5.8159	3.55281
	0.489294	0.57245	3.42408	5.30986
	1.59237	3.16256	2.59916	2.0431
	0.0499793	0.605961	3.3383	2.31664
	0.71928	2.09815	0.378995	0.441354
	1.24268	2.86814	3.54988	3.86106
	2.68864	1.95284	0.977704	0.81691
	2.30522	1.94888	0.769223	2.09811
	1.22937	1.07685	6.3449	6.82476
			5.42648	5.43351
			9.11931	9.84388
			2.33723	2.58062
			2.79485	2.58678
			1.70786	1.50506
			7.51824	6.34348
			4.67742	4.03565
			8.7345	12.1727
			1.71537	2.46536
			1.15081	1.08412
			3.68922	3.00558
			3.7191	4.40064
			3.20223	1.78259
			2.51991	3.94285
			5.04774	4.70654
			1.18945	1.0687
			5.68521	6.45323
			17.6046	19.674
			1.52383	1.38865
			1.96398	1.82301
			1.26543	1.25842
			2.28767	1.13131
			5.26529	5.13702
			10.4742	10.705
			9.304	7.81721
[truncated: 380 more columns]
