# Supplementary material for: Suppressed prefrontal neuronal firing variability and impaired social representation in IRSp53-mutant mice
Source: eLife. 2022 Nov 1;11:e74998. doi: 10.7554/eLife.74998 (PMC9662818; doi:10.7554/eLife.74998)
Supplement: Figure 4—figure supplement 2—source data 1. — The excel file contains the numerical data used to generate Figure 4—figure supplement 2A–D. [file elife-74998-fig4-figsupp2-data1.xlsx]

## Sheet: Fig4_S2
	Fig 4_S2A_Left
	# of neurons	Decoding accuracy (%)
		WT
	1	65	10	55	75	60	35	30	55	50	75	80	75	45	50	65	50	80	70	45	45	70	45	85	60	70	75	75	50	95	35	65	65	50	75	50	65	70	55	40	65	70	55	55	85	60	95	80	55
	2	70	55	80	80	90	80	70	60	55	75	80	40	90	85	85	65	55	70	85	45	70	70	45	75	95	65	85	60	95	65	70	50	75	65	85	50	50	75	80	45	65	95	50	75	80	70	60	80
	3	55	70	50	65	65	70	85	85	90	85	70	20	70	70	70	80	75	65	65	95	80	75	80	95	75	50	40	60	90	75	85	90	60	65	60	45	75	75	90	50	60	95	90	95	70	65	90	85
	4	85	95	45	40	70	45	75	60	65	65	70	60	85	90	85	85	60	65	60	70	85	70	50	70	65	55	80	75	55	85	80	95	75	60	40	75	70	55	70	75	65	100	60	65	60	80	65	60
	5	85	80	75	90	75	85	75	35	55	65	80	80	75	95	75	80	60	85	60	75	85	65	100	80	80	55	75	85	65	80	90	70	75	90	90	95	55	65	80	85	80	70	75	60	50	70	95	95
	6	80	85	85	75	75	75	75	45	75	85	55	55	70	80	65	85	75	65	95	100	75	90	55	90	80	80	65	70	90	60	35	75	75	80	50	80	85	80	90	75	85	65	90	60	35	85	75	80
	7	75	70	85	60	65	75	80	65	70	85	85	60	65	95	85	95	65	100	70	90	85	95	65	65	85	90	90	80	100	80	75	80	70	70	90	90	80	70	90	30	80	85	55	95	80	60	75	75
	8	35	60	65	65	90	80	90	80	100	90	55	100	80	75	70	80	80	80	75	70	80	75	85	70	90	90	80	95	70	95	90	70	65	65	90	75	80	70	95	75	100	90	80	85	85	100	80	65
	9	70	80	70	95	95	85	80	60	80	80	90	75	75	95	95	90	90	90	85	70	70	80	60	75	95	70	80	85	70	100	95	75	90	70	95	75	95	70	90	90	80	100	80	90	85	60	95	80
	10	70	70	55	75	100	80	100	70	95	90	100	75	75	95	80	75	85	80	90	65	95	70	95	90	70	65	75	90	85	75	80	85	100	95	100	95	70	95	75	80	70	70	55	80	55	95	95	85
	11	90	70	75	85	80	95	80	65	75	95	100	75	70	75	65	95	75	60	60	65	100	85	60	75	80	85	65	75	95	70	85	75	75	80	80	95	95	80	80	80	70	90	100	100	75	65	90	85
	12	70	90	95	100	95	60	85	90	90	75	100	100	85	70	80	95	95	100	50	75	70	95	90	55	100	90	100	85	90	85	55	75	100	100	70	75	90	80	100	95	95	80	80	70	90	65	90	65
	13	100	80	80	90	95	100	85	55	80	70	100	100	95	70	75	80	100	85	60	75	85	75	90	90	90	50	70	70	70	80	65	80	75	90	75	75	75	95	80	85	60	90	85	75	70	80	95	80
	14	95	95	70	85	95	70	90	75	55	85	90	85	85	100	80	85	95	90	100	95	85	85	65	90	100	80	85	95	85	95	75	75	90	65	70	95	75	90	80	85	75	75	90	100	80	60	70	70
	15	85	75	75	90	80	85	90	95	75	95	75	90	80	100	60	80	100	90	90	100	100	80	100	95	85	100	65	95	85	90	95	70	85	100	95	80	95	60	90	95	40	90	100	70	60	90	100	85
	16	80	70	100	90	90	80	95	95	85	95	100	85	80	100	75	80	60	90	85	65	90	95	100	70	100	90	75	70	80	90	90	85	95	80	95	90	85	80	80	65	85	100	75	75	80	100	65	90
	17	75	95	95	95	95	80	80	90	100	85	100	90	75	70	80	100	60	75	100	70	90	100	85	100	75	80	90	85	95	95	90	80	95	80	85	85	95	75	90	75	100	100	85	80	85	85	90	100
	18	75	80	65	95	85	100	100	90	75	100	100	75	100	95	95	70	80	100	85	95	90	100	95	70	90	80	95	95	80	80	80	100	75	90	70	90	85	75	80	100	75	95	95	90	100	85	95	100
	19	65	80	100	90	100	95	100	100	95	95	90	90	100	75	90	100	80	75	95	100	95	100	75	60	70	80	75	85	100	90	90	95	85	100	95	85	95	100	75	100	80	60	75	75	90	90	85	80
	20	80	85	100	85	100	85	95	85	90	90	75	85	80	100	90	100	90	85	75	90	90	90	95	95	95	100	100	95	95	100	90	100	80	85	90	100	90	95	100	100	100	100	95	100	85	95	80	100
	21	90	85	55	95	85	100	95	100	90	80	85	80	100	100	80	80	100	90	90	85	95	80	95	65	95	85	85	95	100	95	80	100	100	85	90	100	75	100	100	100	80	100	85	85	95	90	95	75
	22	95	100	80	85	95	95	90	90	100	100	95	90	100	75	100	75	100	75	100	100	90	80	100	70	80	95	100	95	100	95	95	75	100	95	80	70	85	95	80	100	70	85	65	100	100	70	80	95
	23	90	100	90	95	90	100	90	90	100	100	100	100	100	100	90	75	100	85	100	80	65	90	90	85	95	80	90	85	85	100	100	85	95	100	100	70	100	100	95	100	100	85	90	85	90	75	65	100
	24	100	100	95	90	85	85	55	95	100	90	70	100	95	95	100	100	80	85	100	100	95	95	100	100	80	80	100	100	95	95	100	80	100	95	95	85	90	80	80	95	95	95	80	75	100	100	90	80
	25	100	85	85	100	90	80	90	80	90	100	100	100	100	100	95	95	80	100	95	80	100	100	100	65	75	100	90	90	55	80	100	85	80	80	90	85	80	75	100	85	55	80	85	95	90	100	95	100
	26	100	90	50	90	75	95	90	100	100	95	95	100	100	90	100	75	95	90	75	95	90	95	90	80	90	95	95	95	100	95	80	90	100	90	75	90	75	90	55	90	85	85	95	95	95	95	85	95
	27	90	100	95	75	100	100	90	100	100	100	95	85	90	90	100	95	95	90	100	100	95	90	85	100	100	95	95	100	75	100	95	85	100	80	90	90	80	100	90	95	85	100	60	95	90	95	65	75
	28	75	90	75	100	95	75	95	70	95	100	90	90	90	100	95	95	95	100	100	85	85	100	100	95	95	100	100	100	90	80	100	90	85	100	100	95	85	70	80	95	100	100	75	95	100	100	100	100
	29	75	95	95	100	100	100	90	100	90	85	85	100	70	80	90	100	90	90	100	95	90	95	90	100	75	75	85	80	65	90	85	100	100	75	95	100	85	90	100	90	100	100	90	85	85	95	100	100
	30	90	100	100	95	95	95	95	85	85	90	100	95	100	100	100	95	90	90	95	100	90	95	95	90	90	65	75	80	100	90	100	100	95	80	80	100	85	90	100	90	100	90	85	75	95	95	95	100
	31	100	95	100	85	100	95	100	100	95	95	100	95	100	100	80	100	90	100	100	80	100	90	95	80	95	100	100	95	95	100	100	100	100	75	95	85	80	95	95	100	100	100	95	100	80	100	100	100
	32	95	100	100	100	100	100	95	100	100	85	100	95	95	95	95	100	95	90	95	100	100	100	80	95	90	100	100	100	95	90	100	100	100	100	100	100	100	85	100	100	100	100	100	100	95	95	100	95
	33	100	100	90	95	100	85	100	75	100	80	100	90	85	100	100	95	80	100	85	100	90	90	80	95	100	100	100	85	100	100	90	80	100	100	100	95	100	100	100	100	80	100	75	100	100	100	100	100
	34	100	95	95	75	95	100	90	100	90	80	90	100	100	100	90	100	80	95	75	90	95	100	95	100	85	85	100	95	80	95	95	95	100	90	75	100	70	90	70	95	95	100	95	75	100	95	100	100
	35	100	100	100	100	90	100	90	100	100	95	100	100	100	75	95	100	95	100	100	100	95	80	90	100	80	95	80	100	100	100	100	100	95	100	100	100	100	100	85	100	100	95	100	100	100	95	80	100
	36	95	90	90	70	90	100	100	95	100	100	85	100	95	100	90	95	75	100	95	95	100	65	90	100	100	100	95	100	75	85	100	100	95	95	100	100	100	90	95	95	80	90	85	90	100	85	100	90
	37	100	90	90	95	100	100	80	90	100	100	85	95	100	90	100	95	100	95	95	100	95	100	100	70	100	100	100	95	100	95	100	95	95	90	85	100	100	100	100	100	100	95	100	85	95	100	100	100
	38	100	100	80	90	100	100	100	80	90	95	90	100	100	75	100	95	100	100	85	100	95	85	95	100	100	100	100	100	100	90	100	100	100	95	100	100	90	100	100	85	80	100	95	100	95	100	80	95
	39	85	100	95	95	100	100	85	100	90	100	100	85	90	100	100	85	100	95	95	90	100	100	95	80	100	100	90	100	100	100	100	80	95	100	95	90	95	95	95	80	100	100	100	100	100	90	90	85
	40	95	95	100	95	100	95	100	100	100	100	95	95	100	100	95	75	80	90	95	85	90	100	90	95	90	100	95	100	95	100	95	90	80	100	85	100	90	90	90	100	100	95	100	70	100	100	95	100
	41	100	95	100	85	100	95	100	100	100	95	100	85	100	95	100	95	100	95	100	95	100	100	100	90	100	100	100	95	95	100	100	100	100	95	95	90	100	100	95	95	95	100	95	90	100	100	95	100
	42	100	100	90	100	100	100	100	100	100	100	95	85	100	100	85	95	100	100	95	90	100	95	85	100	95	100	90	95	90	100	95	85	100	100	95	90	100	95	100	100	95	100	95	95	95	100	100	95
	43	100	100	100	90	95	100	100	100	100	90	90	100	85	85	100	90	100	100	65	100	100	95	95	95	100	95	100	90	100	100	95	100	85	100	100	95	95	100	100	100	95	100	100	100	100	95	100	100
	44	100	90	100	100	95	100	95	100	85	95	100	90	95	100	95	100	95	100	100	100	95	100	100	100	100	100	100	100	90	100	95	95	95	100	100	100	100	95	100	100	95	100	95	100	100	95	100	95
	45	90	95	90	100	100	95	95	100	100	100	95	100	100	95	100	95	95	100	95	100	100	100	100	100	100	85	95	95	100	100	95	95	100	100	90	95	100	85	100	100	95	95	100	100	90	85	100	80
	46	95	100	100	80	95	90	100	95	95	100	100	100	90	85	95	100	95	100	95	100	90	100	100	100	95	100	90	75	100	100	90	90	100	85	90	100	100	80	95	100	100	100	100	100	100	100	100	95
	47	100	95	100	90	95	100	100	100	100	100	100	100	95	100	100	100	100	100	100	100	100	100	100	90	100	100	100	90	95	100	100	100	100	85	100	95	95	100	85	100	90	95	95	100	95	100	100	100
	48	100	100	100	90	100	100	90	85	100	100	100	100	100	100	95	100	95	95	100	95	100	95	100	100	100	95	100	80	100	100	100	100	100	100	100	90	95	100	100	100	95	100	100	95	100	95	100	90
	49	100	100	100	85	100	95	95	100	100	100	85	100	95	90	100	100	100	100	100	100	100	100	90	100	90	100	100	100	100	100	100	90	95	85	100	100	75	100	95	90	100	90	100	100	100	95	90	100
	50	100	100	95	100	100	100	100	100	95	100	100	100	100	95	100	100	95	90	100	95	100	90	100	95	95	95	100	95	100	100	95	100	100	95	100	100	90	100	90	95	95	100	100	100	100	100	100	100
	51	100	95	90	100	100	100	75	100	95	85	95	95	100	100	100	100	100	95	100	100	100	100	100	95	95	100	100	100	100	100	100	95	100	100	100	100	100	100	95	100	90	100	100	100	100	85	95	100
	52	100	95	100	100	95	100	100	100	100	100	95	100	90	95	80	95	100	95	95	100	100	95	95	90	100	95	100	100	100	100	100	100	100	95	100	95	95	100	100	100	100	100	90	100	100	100	95	100
	53	100	100	100	100	85	95	100	100	100	100	100	100	100	100	100	90	90	100	100	95	100	100	100	100	100	100	100	100	95	100	100	95	100	100	100	90	100	100	100	100	90	95	100	100	95	100	90	100
	54	100	100	90	100	95	100	95	100	100	95	95	100	100	100	90	95	95	100	85	100	100	95	100	95	100	100	100	100	100	100	100	100	100	100	100	100	95	100	100	100	100	100	100	95	100	100	100	100
	55	100	100	100	100	100	100	100	100	95	95	100	100	100	95	90	100	100	95	100	95	100	90	100	100	100	100	100	100	100	100	95	100	100	95	100	100	100	100	100	100	100	95	95	95	100	100	100	90
	56	100	90	100	95	95	95	95	100	100	95	100	95	95	100	100	85	100	100	100	100	95	100	100	100	100	100	100	100	100	100	100	100	100	95	100	100	100	95	100	70	100	100	100	100	100	100	95	100
	57	100	95	100	100	100	100	100	100	100	95	95	100	100	100	100	95	100	95	100	100	95	100	100	100	100	100	100	100	100	100	95	100	90	100	100	100	100	95	100	100	100	100	100	100	100	100	100	100
	58	100	100	95	100	100	100	100	100	100	100	100	90	100	95	100	100	100	90	100	100	100	100	100	90	95	100	100	100	85	95	100	100	95	100	100	100	100	100	100	100	100	100	100	100	100	100	100	100
	59	90	100	100	100	100	100	90	100	100	100	95	100	95	95	100	100	95	100	95	100	90	100	95	95	100	100	100	100	100	95	90	100	100	95	100	100	95	100	95	100	100	100	100	90	100	100	100	100
	60	90	100	100	100	100	100	100	95	100	95	100	100	100	100	90	90	100	100	100	100	100	100	100	100	100	95	100	100	100	95	100	95	95	80	100	100	95	95	100	100	95	95	100	100	100	100	95	95
	61	100	100	100	90	100	95	100	100	100	100	95	85	100	100	100	95	100	100	100	100	100	100	95	95	100	100	95	75	100	95	95	100	100	100	100	100	100	100	100	100	100	100	100	100	100	100	100	100
	62	100	100	95	100	100	100	95	100	100	100	100	100	100	100	100	100	90	100	100	100	95	100	100	100	100	100	90	100	100	90	100	100	85	100	100	95	100	100	100	95	100	95	95	95	100	100	100	100
	63	100	100	100	100	95	100	100	100	90	100	95	100	100	100	100	100	95	100	100	100	100	100	95	100	100	100	95	100	95	100	95	100	100	100	100	100	100	95	100	100	100	100	90	100	100	100	100	100
	64	100	100	100	100	100	100	100	95	100	100	100	100	100	100	100	100	90	100	95	100	95	95	95	100	100	100	95	100	100	100	95	100	100	100	100	100	100	100	95	100	95	100	95	100	100	100	100	100
	65	100	100	100	100	100	100	100	100	95	100	100	100	100	100	90	100	100	100	100	95	100	100	95	100	95	100	100	100	100	100	100	100	100	100	100	100	90	100	100	95	100	100	100	90	100	100	100	90
	66	100	100	90	95	100	100	100	100	100	100	100	100	100	100	100	100	100	95	95	100	95	100	100	100	100	100	100	100	100	100	100	95	100	90	100	100	100	100	100	100	100	100	100	100	100	100	100	100
	67	100	100	95	100	100	100	100	100	100	100	85	100	100	100	95	100	100	100	95	90	100	100	100	100	95	95	95	100	95	95	100	100	100	100	100	100	95	100	100	100	100	100	100	100	100	95	100	100
	68	100	100	100	100	100	100	95	100	95	100	100	100	100	100	100	100	100	100	100	100	100	100	100	100	100	85	90	95	100	100	100	100	100	100	100	95	95	100	100	95	100	100	100	100	100	100	100	100
	69	100	100	100	100	100	100	100	100	95	95	100	100	100	100	100	100	100	100	100	90	100	100	100	100	100	100	100	100	100	100	100	95	100	100	95	95	100	100	100	100	100	100	100	100	100	100	100	100
	70	100	100	95	100	100	100	100	100	100	100	100	100	100	95	95	100	100	100	100	100	100	100	100	100	100	100	100	100	100	100	100	100	90	100	100	100	95	100	100	100	100	100	100	85	100	95	95	100
	71	100	100	95	100	100	100	100	100	100	95	95	100	95	100	100	100	100	100	100	100	100	100	100	100	100	100	100	100	100	100	100	100	100	100	95	100	100	100	100	100	95	100	100	100	100	100	100	100
	72	100	95	85	95	100	95	100	100	100	100	100	95	100	100	100	100	100	100	90	100	100	100	100	100	95	100	100	100	100	100	95	100	100	100	100	100	100	100	100	100	100	100	100	100	100	100	100	100
	73	100	100	100	100	100	100	100	100	100	100	100	100	95	100	100	100	100	100	100	100	100	100	95	100	100	95	100	100	100	100	100	100	100	100	100	100	100	95	100	95	95	95	100	100	100	100	100	100
	74	100	95	100	100	100	100	100	100	100	100	100	95	100	100	100	100	100	100	100	90	100	100	100	100	100	100	100	95	100	100	100	100	100	100	100	100	100	100	100	100	100	100	100	100	100	100	95	100
[truncated: 1,563 more columns]
