# Supplementary material for: Suppressed prefrontal neuronal firing variability and impaired social representation in IRSp53-mutant mice
Source: eLife. 2022 Nov 1;11:e74998. doi: 10.7554/eLife.74998 (PMC9662818; doi:10.7554/eLife.74998)
Supplement: Figure 4—source data 1. — The excel file contains the numerical data used to generate Figure 4A–E. [file elife-74998-fig4-data1.xlsx]

## Sheet: Fig 4
	Fig 4A	E-E				Fig 4B	First S-O				Fig 4C	Absolute FR Range						Figure 4D_Left
	WT		KO			WT		KO			WT			KO				# of neurons	Decoding accuracy (%)
	FR left	FR right	FR left	FR right		FR social	FR object	FR social	FR object		E-E	First S-O	Second S-O	E-E	First S-O	Second S-O			WT
	0.708424	0.608446	0.725241	0.906193		0.634214	0.515556	1.23944	0.33162		0.0999779	0.118658	0.26554	0.180952	0.907822	0.37916		1	25	40	65	70	70	40	75	40	55	70	55	60	60	70	60	75	35	80	85	45	35	75	90	55	65	50	35	35	50	30	60
	16.0846	16.6669	0.17485	0.869306		15.5084	14.0454	1.23896	0.615323		0.582373	1.46305	2.66862	0.694456	0.62364	0.376476		2	80	45	75	70	55	75	55	80	60	15	70	85	25	35	60	85	90	50	70	85	70	50	60	45	70	80	70	55	40	30	40
	8.30374	6.6331	2.0803	1.68843		2.10499	3.378	6.3281	4.68969		1.67063	1.27301	1.84464	0.391869	1.63842	0.863692		3	80	65	45	50	50	55	50	50	40	45	70	50	40	45	85	40	60	45	45	50	45	55	70	70	55	50	65	30	55	75	55
	9.60699	8.63282	2.69273	2.57572		4.66205	5.59061	1.02305	1.72478		0.974171	0.928558	0.223414	0.117002	0.701729	1.49647		4	55	65	75	60	65	55	60	80	85	90	80	55	55	55	75	70	45	70	65	70	40	35	70	85	35	75	65	65	50	55	65
	1.64266	2.09158	1.27273	1.45912		2.52704	6.25896	1.88564	1.22943		0.448926	3.73193	3.15329	0.186397	0.656204	2.20272		5	55	55	85	75	30	60	75	75	80	55	70	70	70	50	50	30	50	60	55	90	45	95	95	50	50	65	40	60	55	65	85
	3.33451	3.12328	2.19419	3.27053		4.1426	2.75832	3.32989	2.26397		0.211227	1.38428	1.67388	1.07634	1.06592	0.294136		6	95	75	75	60	80	60	50	80	70	65	45	65	65	70	75	75	50	70	55	60	75	75	55	65	45	85	75	85	70	65	70
	1.80659	1.70049	1.80865	0.75031		0.362595	0.523516	1.55617	2.21289		0.106093	0.160921	0.0456355	1.05834	0.656713	0.0823442		7	80	70	75	80	55	70	75	70	95	65	60	70	60	60	65	70	65	50	35	65	65	70	50	85	65	50	45	80	70	35	45
	1.67804	1.60508	0.8504	0.59628		0.776292	0.427919	0.931437	1.29053		0.0729644	0.348373	0.426813	0.254121	0.359096	0.182127		8	65	40	60	55	75	55	75	70	65	65	60	90	60	60	85	55	80	65	65	35	70	70	75	60	60	40	60	90	70	80	45
	5.21291	4.94234	9.26137	10.3973		3.31163	2.57216	9.45363	10.5201		0.270572	0.739471	0.121023	1.13593	1.06651	1.55516		9	50	55	40	65	60	70	55	75	60	65	60	80	70	70	55	70	65	80	70	75	75	70	70	45	70	70	65	55	85	60	65
	0.191282	0.166749	1.74563	0.951186		0.929839	0.317113	0.176987	0.08856		0.0245327	0.612726	0.184491	0.794446	0.088427	0.358898		10	45	60	85	70	85	95	45	45	60	85	45	75	65	75	95	55	50	70	60	60	75	45	90	85	65	55	90	50	70	55	70
	0.595273	0.367182	13.7986	12.0731		1.50361	0.988146	9.50248	11.1615		0.228092	0.515468	1.92984	1.72548	1.65899	0.998312		11	55	75	65	75	75	35	70	85	80	75	75	65	70	50	50	65	60	40	60	70	60	50	65	65	75	55	55	70	75	65	85
	4.07276	5.58589	0.742023	1.12804		1.26494	2.23354	1.13439	1.24555		1.51313	0.968597	0.569617	0.386018	0.11116	1.827		12	65	65	60	65	90	70	70	45	60	70	65	45	85	70	65	75	45	65	45	35	65	70	60	35	65	75	40	55	65	60	70
	0.888441	0.543934	8.30223	7.10581		0.959327	0.344755	5.69045	8.8212		0.344507	0.614572	0.48367	1.19642	3.13075	0.301376		13	75	35	70	100	60	45	90	30	90	55	75	55	50	45	50	35	70	35	70	55	90	75	65	80	70	85	70	65	60	80	75
	1.59907	0.813021	6.12637	4.01335		2.38981	1.38069	3.11218	3.83636		0.786047	1.00912	1.93227	2.11301	0.724174	0.21019		14	75	45	95	85	45	55	60	70	65	75	50	95	75	75	65	65	75	70	35	80	55	45	70	60	85	40	80	60	55	60	65
	3.36596	3.43417	1.9385	2.22976		3.52522	4.18404	2.82192	2.40635		0.0682058	0.658827	0.266602	0.291265	0.41557	3.23708		15	95	50	65	70	65	70	75	85	70	65	80	75	80	50	50	80	80	55	85	75	70	40	60	70	40	60	80	85	70	80	95
	5.47898	6.00567	0.264969	0.292814		4.63936	6.21382	0.0841885	0.850871		0.526692	1.57446	1.32926	0.0278441	0.766683	0.332783		16	50	75	90	85	50	60	85	65	65	80	60	95	70	60	55	90	65	75	80	100	65	80	60	60	80	70	65	65	85	100	70
	13.3096	13.0132	1.81291	4.32692		11.1499	14.2875	5.52921	2.72976		0.296404	3.13756	3.30978	2.51401	2.79946	1.2947		17	55	80	60	75	55	30	95	85	60	55	45	55	90	55	55	75	90	70	85	50	50	80	40	60	55	50	75	75	60	50	90
	2.94891	1.45363	3.85508	4.33708		1.95501	2.62485	2.06647	2.66248		1.49527	0.669842	3.06372	0.482002	0.596007	0.288968		18	65	70	75	85	60	50	85	95	50	75	75	80	45	75	75	55	45	60	70	70	80	85	70	65	75	85	65	65	70	60	85
	0.997963	1.56305	3.96634	4.03117		1.09773	1.69994	6.18536	5.37377		0.565089	0.602207	0.072477	0.0648394	0.811588	2.43858		19	45	90	70	75	60	70	75	65	55	55	50	65	90	45	70	85	85	65	95	65	75	55	70	40	80	70	55	65	50	80	60
	1.89565	1.49276	0.935672	0.917563		0.178517	1.70122	0.336907	1.34562		0.402888	1.5227	0.970573	0.0181086	1.00871	0.117798		20	60	60	75	90	70	45	60	55	80	40	60	80	65	90	75	70	90	75	80	100	55	65	50	70	85	60	65	95	45	55	65
	1.02174	0.389901	5.17479	5.19053		0.538467	1.61433	7.96644	7.21823		0.631838	1.07586	0.208995	0.0157318	0.748209	3.71692		21	95	75	50	65	70	90	80	55	40	80	65	60	75	55	80	65	75	55	40	75	45	60	55	75	90	70	65	65	65	50	40
	12.755	10.6047	0.331233	0.143604		7.15709	10.4463	0.348201	0.783764		2.15033	3.28918	0.23764	0.18763	0.435563	0.0991309		22	55	55	60	40	50	75	80	45	75	50	45	80	45	60	80	80	80	75	70	95	55	65	40	80	90	85	45	75	50	95	75
	0	1.1063	2.75514	1.39248		0.0299401	0.954132	1.91851	1.50616		1.1063	0.924192	0.439598	1.36266	0.412354	0.885427		23	55	85	55	70	60	50	55	60	50	80	75	65	60	55	85	75	50	40	55	55	60	60	75	60	90	95	60	85	60	85	60
	0.323356	0.285165	1.01131	0.674593		0.433664	0.147013	0.565877	0.682161		0.0381907	0.286651	0.336509	0.336715	0.116284	0.148846		24	55	90	40	90	55	70	80	80	50	60	40	45	65	60	80	40	60	60	60	55	50	50	70	90	60	85	50	70	60	80	75
	3.01247	4.05355	0.544496	1.65656		5.91744	2.71477	0.476584	0.179945		1.04108	3.20267	0.829991	1.11207	0.296639	0.909446		25	65	70	95	65	70	75	90	60	65	85	40	70	60	70	70	65	80	80	60	75	70	55	60	90	90	60	45	30	95	75	85
	10.5771	11.1605	1.71637	1.56239		10.9935	13.7232	1.82595	1.26912		0.583341	2.7297	2.20252	0.153975	0.556827	0.817583		26	70	60	75	80	90	75	85	45	40	75	45	75	50	85	60	65	80	85	60	75	75	65	95	65	90	85	50	85	70	65	95
	1.87359	2.31476	1.4947	1.11396		3.19305	3.46725	1.58797	2.92021		0.441172	0.274199	1.31872	0.380735	1.33224	0.728006		27	75	75	65	80	80	75	75	70	45	45	95	95	75	50	60	55	65	50	45	75	65	60	95	75	65	90	65	95	80	70	55
	8.49737	8.81509	1.52458	1.01585		9.0414	10.5564	0.433042	1.32051		0.317726	1.51496	1.11946	0.508724	0.887472	0.347837		28	85	50	70	80	95	85	70	90	70	60	85	85	70	85	100	70	70	75	90	45	80	50	55	70	40	75	60	35	45	40	70
	14.8252	11.9475	0.648733	0.475013		12.1409	13.7868	0.510848	0.766708		2.87767	1.64594	0.538775	0.17372	0.255859	1.07111		29	70	90	60	60	75	65	80	65	70	85	55	85	70	100	85	85	90	90	75	70	90	65	50	60	75	65	65	75	80	65	80
	3.2778	3.25487	8.93646	12.073		2.83995	3.66247	7.71539	10.876		0.0229282	0.822517	0.174656	3.13654	3.16064	10.924		30	85	65	80	75	90	60	75	70	85	55	90	55	50	60	85	85	65	80	55	80	75	60	60	95	95	70	95	95	65	100	55
	6.86407	3.98256	0.573137	0.629916		3.11953	4.29147	1.2874	0.939695		2.8815	1.17193	1.03087	0.0567786	0.347708	0.345812		31	65	80	75	80	50	100	65	65	65	60	75	65	85	65	100	90	70	75	65	60	50	65	70	85	75	80	60	65	90	80	80
	5.26471	6.6684	1.03048	0.914243		4.88305	5.59834	0.849261	1.01601		1.40369	0.715283	1.88104	0.116233	0.16675	0.447684		32	45	60	55	70	80	80	65	55	55	70	65	65	50	85	85	80	70	80	70	75	75	75	85	85	65	45	75	70	65	60	70
	0.208652	1.51153	1.06548	1.21204		1.73576	0	0.792823	1.30037		1.30288	1.73576	0.84555	0.146569	0.507546	0.0229303		33	75	45	60	70	70	95	75	90	65	65	70	75	75	80	70	90	40	45	70	90	70	85	80	65	95	50	70	60	70	80	55
	0.743925	1.41961	0.627982	1.21134		1.57039	0.0896799	1.42026	1.08687		0.67568	1.48071	0.570448	0.583361	0.333385	0.401353		34	55	65	80	65	55	75	60	65	70	45	65	65	90	55	85	70	70	95	55	85	50	70	75	70	70	75	70	85	80	50	85
	0.316341	0.249274	3.03538	5.17517		0.513732	0.818424	1.93704	5.17486		0.0670669	0.304692	0.871778	2.13979	3.23782	2.80073		35	65	85	80	90	60	85	85	70	80	50	55	90	45	55	70	70	75	70	60	75	70	70	75	90	55	70	85	80	60	70	100
	1.57509	1.18353	0.745804	2.35592		3.35976	0.278565	0.740132	1.1716		0.391563	3.08119	2.351	1.61012	0.431469	0.0381563		36	80	85	45	85	90	45	55	65	80	65	85	100	75	85	50	60	70	85	75	55	80	65	55	70	95	85	80	70	90	65	70
	0.82973	1.55963	4.81872	5.9509		0.476265	0.973941	4.51378	4.67813		0.729897	0.497676	0.391001	1.13218	0.164345	1.82077		37	85	60	50	60	70	75	75	50	60	70	90	45	80	85	55	85	75	85	95	55	90	80	85	90	95	80	55	65	65	60	100
	0.298278	0.340033	0.897564	0.405775		0.850003	1.00329	1.37818	2.09703		0.0417548	0.153285	0.413955	0.491789	0.718855	1.2463		38	45	65	90	35	90	60	85	90	60	85	95	80	55	65	60	75	55	45	75	70	75	85	75	70	85	60	50	75	75	75	70
	0.253082	0.542479	0.437816	0.21427		1.29897	0.79896	0.482172	0.586243		0.289396	0.500009	0.108409	0.223546	0.104071	1.01747		39	65	60	90	55	90	100	55	80	80	70	60	85	65	60	40	90	60	75	70	75	50	70	70	80	65	55	60	90	60	50	35
	2.56098	2.94951	0.0424851	0.0569604		2.56404	2.46492	0.439741	0.105576		0.388531	0.0991177	1.85719	0.0144753	0.334164	0.208968		40	60	90	65	55	100	70	55	80	85	85	85	80	90	80	50	95	65	85	70	90	85	55	95	90	90	55	90	85	55	70	100
	3.33626	3.14823	2.45303	3.3257		2.33235	3.84872	1.77664	3.05806		0.188023	1.51637	0.291569	0.87267	1.28142	0.139911		41	80	70	55	80	85	60	90	95	95	95	65	70	70	95	55	65	70	80	50	85	75	75	70	50	55	90	80	85	65	65	85
	8.6011	9.93024	11.1225	11.3475		7.15268	7.14792	3.03366	4.38563		1.32914	0.00475124	0.647297	0.224958	1.35197	4.18915		42	75	60	65	80	95	50	65	95	90	85	85	60	80	95	65	55	70	95	80	70	75	60	80	65	70	85	60	60	95	85	55
	2.12541	2.50396	1.57751	1.22248		0.977359	1.73	3.72023	1.55365		0.378551	0.752637	0.424595	0.355023	2.16658	0.108989		43	60	75	60	90	95	70	35	95	70	75	85	80	70	80	95	50	75	75	75	45	55	80	65	80	80	65	90	100	65	80	95
	0.71367	0.835869	0.217985	0.424619		0.851863	1.03261	6.82713	2.87683		0.122199	0.180749	0.750886	0.206634	3.9503	1.54143		44	80	60	80	80	85	55	35	70	90	90	90	50	90	75	70	80	75	80	90	80	90	90	65	60	65	60	90	60	80	70	75
	6.44635	4.55025	5.95216	4.46181		3.92833	4.967	0.749834	2.96232		1.8961	1.03868	0.653887	1.49035	2.21248	0.355163		45	75	75	75	85	90	80	75	55	80	60	65	90	95	85	45	60	100	75	80	80	75	90	60	95	85	70	65	75	70	70	85
	6.10566	7.6301	7.09922	5.00458		11.0703	8.37709	4.29798	4.11994		1.52444	2.69324	0.546257	2.09464	0.178035	1.84952		46	95	95	80	65	35	55	95	80	70	80	50	55	85	70	75	75	75	85	70	70	65	95	90	80	90	90	65	80	55	75	60
	1.59629	0.375473	0.307497	0.150777		0.805788	0.753936	0.622282	0.402513		1.22081	0.0518518	3.38028	0.156721	0.219769	0.32581		47	80	100	75	60	70	75	80	100	85	65	60	60	85	50	85	65	55	60	80	75	80	90	90	75	65	55	95	70	85	70	65
	3.76623	3.22391	2.68704	2.67557		3.95669	2.74439	0.891088	2.70912		0.542324	1.2123	0.0421427	0.0114734	1.81804	0.0227483		48	90	75	80	55	80	85	85	85	65	75	70	85	60	80	65	65	70	65	85	90	60	100	70	95	90	50	85	60	90	90	70
	4.32088	6.60809	1.57655	1.87147		6.67907	7.91359	3.56128	3.34786		2.28721	1.23451	6.018	0.294917	0.213419	0.0998376		49	80	60	80	85	45	85	75	100	75	75	60	95	60	50	45	95	85	80	95	65	80	80	65	55	90	85	65	75	95	80	75
	11.587	11.6367	2.42926	1.93248		5.53801	7.69126	0.99323	0.319992		0.0497506	2.15325	0.768423	0.49678	0.673238	0.660096		50	90	95	60	70	75	55	80	80	80	95	70	90	50	70	65	85	75	60	80	60	45	70	95	85	75	85	70	80	70	85	95
	7.12689	3.85401	14.4824	15.1247		5.45319	4.93873	14.0026	14.8063		3.27288	0.51446	0.687527	0.642338	0.803723	1.85396		51	80	90	45	80	75	65	90	65	65	50	45	75	60	95	60	55	90	50	75	100	75	95	90	90	75	80	75	60	80	85	55
	1.09932	0.77916	2.27365	1.8525		0.748629	0.518949	1.3868	0.885371		0.320157	0.22968	0.198722	0.421152	0.501427	4.27667		52	85	75	60	80	95	90	85	80	90	60	65	85	95	75	80	70	85	50	95	65	75	55	75	95	85	75	70	75	50	80	55
	1.48697	1.14779	6.24061	1.20778		0.683133	0.498367	4.84412	2.13136		0.339184	0.184766	0.200579	5.03283	2.71276	0.395906		53	70	65	55	70	80	70	85	95	45	95	80	80	65	75	75	65	100	80	85	70	70	80	85	55	90	100	70	80	60	90	80
	0.476796	0.488371	0.591118	0.402373		2.12035	0.557294	0.770528	0.723719		0.0115745	1.56305	0.386903	0.188744	0.0468096	0.291848		54	75	95	85	85	85	45	95	70	85	80	70	75	60	70	95	65	85	65	60	75	90	90	85	90	90	75	45	60	75	80	100
	2.0966	3.06001	0.692234	0.597159		1.45887	3.04122	7.11384	6.94732		0.963415	1.58235	0.25443	0.0950748	0.166519	0.367417		55	70	100	80	80	85	80	95	65	100	50	90	85	75	80	80	60	70	65	60	70	65	55	65	100	65	70	75	80	90	70	90
	4.15309	2.96343	1.01103	1.61076		1.70551	1.22521	1.36002	1.11706		1.18966	0.480305	0.457676	0.599729	0.242966	0.462331		56	80	80	95	90	85	75	70	80	75	85	85	80	70	85	90	90	80	80	85	75	80	75	85	85	75	70	45	75	100	70	75
	0.391435	0.131111	2.68318	2.44284		0.378889	0.642497	0.287058	1.05166		0.260325	0.263608	0.351547	0.240341	0.764598	0.0474966		57	95	55	85	65	90	75	50	80	75	75	95	70	80	85	35	65	65	65	70	75	80	80	75	60	70	90	95	75	70	90	55
	6.62992	8.10022	5.04194	5.33936		9.82962	6.4035	3.30012	5.03783		1.4703	3.42612	0.14488	0.297421	1.73771	1.49833		58	70	75	85	60	75	85	80	75	75	60	95	85	90	90	90	75	90	95	75	60	60	100	50	65	100	95	80	85	85	75	90
	2.75736	6.25758	0.491688	0.880238		0.664778	0.208058	0.358793	0.460894		3.50022	0.456721	0.502858	0.38855	0.102101	0.215438		59	60	95	95	80	65	75	95	75	100	55	100	85	70	100	45	65	70	75	70	75	60	85	85	80	80	80	75	75	65	80	80
	5.95661	7.70232	1.43354	1.24455		3.62748	4.08612	1.52674	1.21518		1.74571	0.458633	0.750081	0.18899	0.311562	0.423963		60	80	60	90	95	85	90	85	55	85	80	65	75	65	85	100	60	100	90	65	80	100	75	85	100	85	65	85	70	80	90	60
	0.677137	0.793241	8.73916	8.71668		1.6333	2.62465	11.9285	8.41597		0.116104	0.991352	1.43646	0.022479	3.51255	2.25324		61	80	70	70	90	80	95	70	95	75	65	65	60	85	80	65	100	80	70	100	80	60	95	55	80	95	85	90	95	85	80	75
	0.22758	0.0876542	2.09781	2.28693		1.29674	0.454449	2.16803	3.39703		0.139926	0.842291	1.24117	0.189113	1.229	1.51817		62	85	85	75	95	60	70	65	70	100	90	95	70	80	75	50	100	75	100	95	80	75	70	85	65	75	100	80	70	95	80	70
	5.69398	5.34391	2.34888	2.54562		4.50332	7.32799	3.51352	3.94646		0.350064	2.82467	0.199555	0.196743	0.432946	0.95		63	90	80	55	95	65	75	95	85	90	85	90	85	60	60	75	70	65	90	80	70	70	90	65	75	55	65	90	70	80	90	75
	5.54877	4.38028	1.47219	2.0653		12.4675	7.17596	1.69497	1.79228		1.16849	5.29154	0.284432	0.593107	0.097311	0.221111		64	95	65	85	85	60	75	95	75	80	80	70	85	60	85	90	70	70	70	70	75	75	90	75	80	70	90	90	75	65	75	85
	3.60714	3.6066	6.11901	5.59951		0.386598	1.36831	4.36597	5.20373		0.000539011	0.981708	0.376949	0.519501	0.837757	0.183996		65	55	85	75	75	90	55	85	65	80	60	70	80	70	85	75	90	75	50	85	100	90	45	55	85	70	95	60	70	60	85	85
	0.621791	1.64667	0.563437	0.601474		0.777769	0.542027	0.304793	0.721535		1.02488	0.235742	0.0139746	0.0380367	0.416742	0.21982		66	85	70	60	100	70	80	80	70	95	85	70	75	90	70	80	65	95	75	80	80	85	55	55	60	90	70	90	65	80	95	95
	1.15898	0.867283	3.29822	4.32676		2.23833	0.271817	7.73085	8.36723		0.291696	1.96651	1.5268	1.02854	0.63638	0.192334		67	60	90	95	55	75	60	70	100	80	60	85	80	95	65	80	55	65	85	55	85	90	85	70	95	95	70	90	75	85	85	90
	0.886891	0.805981	1.13203	2.22308		2.35139	1.23157	0.737842	0.8931		0.08091	1.11982	0.170816	1.09104	0.155258	1.53062		68	90	80	80	80	75	85	80	85	85	65	75	75	80	85	45	65	65	100	90	90	60	80	70	70	100	95	60	70	80	95	75
	1.7747	2.28922	2.91041	3.23608		4.54763	4.68951	3.59973	3.18077		0.514515	0.141883	2.77278	0.325673	0.418961	1.59059		69	90	55	95	80	90	65	90	40	85	80	65	90	65	100	90	100	85	70	95	80	80	80	70	90	85	75	80	80	100	95	85
	11.0431	11.9095	0.982401	1.31617		16.8743	20.3747	0.554974	1.03093		0.866358	3.50043	1.09497	0.33377	0.475952	1.23154		70	70	70	70	75	85	100	100	75	95	85	70	80	75	90	100	75	90	60	90	65	70	80	100	95	75	85	85	85	70	70	90
	0.910506	1.68041	1.06509	1.0334		1.00306	0.729023	0.660576	1.14985		0.769905	0.27404	0.453081	0.0316928	0.489269	0.0865749		71	80	80	70	100	80	75	95	80	55	80	85	90	95	85	90	80	95	75	80	80	100	70	70	90	60	75	95	80	65	65	75
	8.87089	9.43606	0.85605	0.85325		7.75364	5.41757	0.666393	0.468301		0.565176	2.33607	0.187982	0.00280009	0.198092	0.199424		72	60	95	75	50	75	75	95	80	70	65	80	80	95	65	90	70	75	100	75	95	80	100	95	95	65	80	95	95	95	55	70
	1.73705	1.86307	2.9405	2.85474		1.60689	1.41012	3.51234	2.7672		0.12602	0.196776	0.677904	0.0857551	0.745146	0.063532		73	60	65	80	85	85	95	95	100	90	75	90	85	75	65	60	80	95	75	85	75	75	85	90	85	65	85	75	90	80	70	90
	0.885643	0.652428	6.83529	5.98996		4.33167	4.14529	7.66552	6.34125		0.233215	0.186381	0.38266	0.845325	1.32427	0.306411		74	95	85	75	45	75	70	90	90	95	70	75	75	90	80	95	70	100	80	90	70	90	90	85	100	95	85	90	90	55	90	90
	1.037	0.684124	2.42345	2.60714		1.40796	0.603199	2.47284	1.23922		0.352876	0.804758	1.2281	0.183695	1.23362	0.190387		75	90	65	85	65	85	90	95	80	75	65	85	55	80	85	85	85	80	80	85	70	85	95	60	85	60	50	80	80	80	70	85
	1.153	0.853662	2.09933	2.38119		1.09916	1.08972	0.412772	1.10449		0.299336	0.00943943	0.65898	0.281864	0.69172	0.0350085		76	90	85	85	70	80	65	85	85	65	85	75	80	75	90	95	90	70	85	75	80	60	60	95	70	60	80	90	80	75	80	95
	1.23615	0.531223	0.695731	0.425975		0.920604	2.773	0.167702	1.13199		0.704929	1.85239	0.336502	0.269757	0.964291	0.184834		77	65	65	75	70	90	70	80	90	75	75	60	60	90	70	70	85	85	75	95	65	80	70	75	100	80	55	80	80	85	55	80
	3.86933	3.98938	1.34029	1.71936		1.09822	4.18579	1.86012	1.41766		0.120048	3.08757	0.827677	0.379074	0.442469	0.523504		78	60	60	75	85	100	90	50	50	75	60	50	60	85	100	80	80	90	95	80	80	100	95	80	95	90	80	85	60	70	75	80
	11.2998	10.9045	0.550964	1.0111		7.3428	9.6041	0.660632	0.281502		0.395249	2.2613	0.694352	0.460132	0.379129	0.0581128		79	80	80	95	80	90	95	90	85	90	70	75	90	90	75	75	90	75	80	85	100	85	85	80	90	65	90	75	75	100	85	75
	4.40735	2.28439	7.74376	5.52876		0.249314	2.87707	3.84202	5.15604		2.12296	2.62776	2.0256	2.21501	1.31403	0.134376		80	85	90	75	65	95	95	90	75	65	85	80	100	90	90	90	75	90	80	65	80	60	90	85	55	75	85	65	80	95	75	100
	4.5715	4.82394	0.3996	0.633269		2.22895	4.43633	0.40781	0.40346		0.252443	2.20738	0.0697532	0.233669	0.00435033	0.128855		81	70	80	65	70	80	70	90	90	85	95	85	95	75	100	85	85	70	65	65	65	95	75	75	95	65	75	80	90	85	80	60
	5.7944	6.15929	3.00536	2.30184		4.60377	3.18966	3.83767	3.4001		0.364894	1.41411	0.850094	0.703528	0.437566	0.531712		82	85	65	95	95	90	65	95	90	75	80	95	70	95	65	65	75	95	90	75	90	75	80	80	100	65	80	65	90	95	80	80
	1.6169	1.08927	6.30877	4.76049		0.261815	0.415064	2.62676	3.16937		0.527628	0.153248	0.246678	1.54828	0.542606	1.37754		83	95	90	90	75	70	45	85	85	60	95	90	90	70	75	90	60	80	75	75	70	85	95	70	85	50	95	95	85	95	80	75
	1.52718	1.16062	3.99259	3.8796		1.99943	1.45986	3.70288	3.28028		0.366566	0.539571	0.0140924	0.112992	0.422595	0.0206755		84	80	95	80	85	90	75	75	80	85	85	85	80	90	70	85	85	95	95	75	90	75	85	80	85	90	55	80	85	80	100	90
	0.615956	0.468511	11.1851	9.85546		0.541242	1.02684	11.5252	10.1578		0.147445	0.485602	0.142565	1.32965	1.36737	3.14612		85	95	90	95	90	90	95	85	75	90	80	90	80	60	90	80	70	50	75	65	60	75	85	95	95	85	95	60	75	75	75	60
	0.840688	0.402997	0.749573	1.0944		0.66501	0.655915	2.48649	1.27347		0.437691	0.00909467	0.425331	0.344829	1.21302	0.0555044		86	75	80	75	75	85	80	80	95	90	65	70	80	85	65	90	85	70	85	85	65	90	85	65	75	85	85	75	95	60	95	95
	1.10056	1.81702	6.38011	6.61319		1.41283	1.92004	5.42089	5.0681		0.716465	0.50721	0.0986673	0.233084	0.352795	0.0526853		87	75	65	90	75	85	95	85	60	80	75	90	80	95	70	95	85	95	50	85	90	85	100	85	75	75	70	85	85	95	70	75
	0.240488	0.334838	1.01369	0.835735		0.405819	0.590793	0.96692	0.767576		0.0943503	0.184973	0.484321	0.17796	0.199344	0.0994499		88	90	70	90	90	85	75	100	90	100	95	85	90	85	55	60	80	70	80	80	95	85	80	65	85	95	80	85	80	75	95	90
	1.80823	2.29662	2.50848	2.48612		0.135405	0.169796	3.17654	2.67495		0.488389	0.0343918	0.264576	0.0223645	0.501599	0.92556		89	95	70	90	85	80	65	65	80	90	90	100	90	80	100	95	75	80	90	60	85	80	75	95	70	90	85	90	90	80	100	90
	0.814203	0.745339	2.55188	2.35891		1.06706	0.970855	5.67616	4.66985		0.0688637	0.0962086	0.44784	0.192963	1.00631	3.25485		90	80	100	95	85	90	95	85	65	85	80	75	100	95	80	70	90	70	90	80	70	90	70	85	80	95	85	85	65	90	95	90
	9.10944	7.89738	0.676567	0.998343		5.05761	6.01622	0.406043	0.672304		1.21206	0.958606	1.58253	0.321776	0.266261	0.294099		91	65	85	75	95	70	85	60	85	100	60	90	90	75	85	80	90	90	95	90	75	65	100	100	100	85	85	75	80	80	95	65
	0.232237	0.452322	3.47348	2.56947		0.711183	0.481714	1.15285	2.04962		0.220085	0.229469	0.104107	0.904015	0.896771	0.722438		92	95	90	95	85	95	75	100	65	90	100	80	100	80	85	90	60	65	85	90	80	90	75	75	95	95	95	75	70	75	95	85
	6.2075	5.62122	3.45202	2.85498		5.35233	5.57835	1.78968	1.64584		0.586279	0.226023	0.649434	0.597037	0.143835	0.484451		93	85	80	100	70	75	95	70	90	85	80	85	65	95	85	75	80	80	100	65	65	85	85	80	55	85	80	95	85	95	95	80
	4.29807	3.97761	12.2615	10.8722		2.73896	4.85336	12.0174	11.7847		0.320462	2.1144	0.942233	1.38926	0.232735	0.141976		94	95	75	85	90	100	80	90	70	95	80	85	80	75	95	65	85	90	95	70	75	80	85	80	80	90	90	75	85	95	85	80
	0.560524	0.357477	0.833298	0.815075		0.681988	0.401241	0.249236	0.513085		0.203047	0.280747	0.14599	0.018223	0.263849	0.209337		95	85	95	75	90	90	90	90	90	90	85	90	85	80	90	85	95	85	90	70	80	70	60	95	85	95	85	85	90	85	90	60
	3.02338	2.40975	1.01928	1.23287		0.940584	1.41512	0.423282	0.560192		0.613635	0.474535	0.441288	0.213586	0.13691	0.0260934		96	80	70	80	80	65	75	90	85	100	90	85	80	90	75	90	100	90	95	65	90	85	65	100	100	95	85	95	95	85	70	75
	0.723005	0.483332	6.52247	5.79262		0.324047	1.1056	12.2314	14.9048		0.239673	0.781556	0.122014	0.729848	2.67338	3.01943		97	75	90	85	90	90	65	75	95	95	90	80	85	70	95	90	75	90	95	95	65	90	85	95	95	75	85	70	90	70	75	70
	0.200471	0.929668	0.844479	1.76209		2.21859	1.72525	5.53146	1.00783		0.729197	0.493343	0.859801	0.917609	4.52364	0.479442		98	75	85	65	95	90	70	80	60	65	80	100	80	85	80	90	80	85	50	100	95	85	80	95	80	70	90	95	95	95	80	85
	9.44546	5.83957	8.299	7.42386		5.23654	3.59837	6.9866	5.35967		3.60588	1.63817	0.078128	0.875142	1.62693	0.26891		99	90	85	65	70	95	95	85	95	85	70	90	90	85	85	85	85	85	65	85	90	100	90	95	65	65	65	85	85	75	100	85
	5.48122	8.56108	1.01033	0.8125		10.7921	7.98543	0.945197	0.452762		3.07987	2.80665	4.49395	0.197827	0.492435	0.269588		100	100	90	95	75	85	70	90	80	90	75	75	65	95	85	95	85	75	100	80	85	95	80	70	80	95	90	60	100	85	85	95
	1.67079	2.00388	0.345698	0.30447		1.40496	0.788684	0.288937	0.466398		0.333089	0.616275	1.2684	0.0412281	0.177461	0.325744		101	85	50	80	95	90	100	85	75	85	100	90	90	75	90	75	95	95	80	65	60	80	50	90	65	85	80	80	80	75	80	75
	0.869299	0.498519	2.13724	1.75065		4.20123	1.87312	0.939523	1.0385		0.370779	2.3281	0.11806	0.38659	0.0989798	0.420378		102	85	75	90	90	95	75	85	85	85	100	90	70	90	90	70	85	80	85	80	90	90	85	85	65	95	80	90	95	95	75	95
	2.19873	2.13792	7.42887	7.19819		2.47618	0.788684	8.83003	5.802		0.0608059	1.6875	0.428833	0.230675	3.02803	1.00616		103	70	100	75	80	95	90	85	85	95	95	85	80	85	85	85	95	100	85	90	60	100	90	80	100	100	80	85	90	100	95	90
	3.60961	4.69619	0.784794	0.416711		5.51325	8.97128	0.820859	0.89528		1.08658	3.45803	0.137025	0.368083	0.0744207	0.0862787		104	60	95	90	95	100	85	75	70	80	100	75	95	95	80	65	70	90	100	90	70	95	100	90	85	85	80	100	95	100	90	75
	4.65255	4.19301	4.02499	4.57457		4.93624	3.15474	2.51807	2.52985		0.459536	1.7815	1.40374	0.549587	0.0117811	0.334496		105	65	90	95	75	70	95	80	80	90	65	75	80	90	80	65	100	75	95	90	95	85	85	100	80	75	85	65	100	85	70	95
	1.21556	2.34545	9.25452	8.57966		1.27419	0	9.63107	9.4891		1.12988	1.27419	0.97314	0.674858	0.141974	0.00405178		106	90	85	80	80	85	75	70	85	90	70	100	70	65	75	90	80	70	85	90	90	80	90	85	90	85	85	75	90	85	95	90
	0.319606	0.555021	0.925873	0.703645		0.229653	0	1.37163	2.02503		0.235414	0.229653	2.10028	0.222228	0.653392	2.9578		107	90	90	60	85	95	75	100	100	80	85	75	80	95	85	95	95	100	75	100	85	75	100	80	80	90	90	90	90	85	90	85
	0.180302	0.25104	0.762797	0.74556		0.535024	0	0.608444	1.01451		0.0707383	0.535024	0.0260085	0.0172363	0.406069	0.00165541		108	95	85	85	65	85	80	90	85	85	75	95	60	90	85	75	70	95	80	75	100	95	100	80	85	95	75	95	85	100	100	95
	2.54826	2.26944	2.12824	1.89058		2.42416	1.52675	0.55624	1.07948		0.278825	0.89741	0.5987	0.237658	0.523235	0.444758		109	85	70	75	90	85	90	90	65	80	90	90	75	90	90	75	90	75	85	90	85	95	65	90	55	95	95	95	95	70	80	85
	1.48788	1.23912	3.45362	3.50158		0.497183	1.11749	6.5734	7.13245		0.248759	0.620306	0.139964	0.0479632	0.559048	0.454449		110	90	80	85	95	95	80	100	90	95	85	95	70	90	85	80	95	90	80	95	85	95	85	85	75	85	90	90	85	95	95	100
	0.88966	1.05806	9.47072	7.17024		1.66066	1.3254	7.1957	6.0732		0.168398	0.335264	0.000489757	2.30049	1.1225	1.33258		111	75	65	70	100	95	95	65	95	85	85	80	80	85	90	70	85	95	90	95	95	100	80	95	70	95	90	80	85	85	85	95
	9.031	7.70656	3.04927	2.70947		12.1349	9.8515	2.03777	4.15283		1.32444	2.28338	1.4546	0.339801	2.11506	0.425651		112	70	90	80	90	95	90	80	70	95	90	100	90	85	75	85	80	75	70	80	90	95	85	70	95	90	80	95	90	70	80	90
	1.23862	1.65891	1.00143	0.756644		0.40754	0.307568	1.26321	0.537921		0.420289	0.0999727	0.244062	0.244783	0.725293	0.209298		113	90	80	90	90	70	90	80	75	100	85	90	90	80	95	90	95	80	75	75	100	85	90	85	90	95	85	80	90	85	85	90
	3.44899	2.50865	1.13576	1.13087		3.22713	5.01454	0.874395	1.10041		0.940342	1.78741	0.734449	0.00489314	0.226018	0.538842		114	90	95	95	75	95	70	80	85	75	85	75	100	90	90	80	90	95	100	70	85	80	85	65	100	60	90	85	80	90	85	75
	0.874518	0.781341	7.37212	6.43028		1.11058	0.689056	6.29128	6.83829		0.093177	0.421523	0.791737	0.941845	0.547008	1.20389		115	100	75	90	85	90	85	100	100	80	75	90	65	95	70	95	95	75	80	75	95	95	90	95	70	100	80	95	85	95	80	90
	2.15633	1.99645	0.13744	0.228593		1.927	2.38144	2.52815	0.686745		0.159882	0.454444	0.119247	0.091153	1.8414	1.25879		116	95	60	85	85	100	95	90	95	100	70	100	80	75	90	100	75	75	90	95	85	80	95	70	90	80	85	75	85	80	90	90
	0.387843	0.415116	0.436673	0.253608		0.933041	0.937636	1.1241	1.8385		0.0272735	0.00459506	0.0711936	0.183065	0.714404	0.000293086		117	85	90	80	90	95	95	85	80	100	90	95	90	90	95	75	90	90	75	85	55	90	100	100	80	90	80	70	95	95	90	70
	5.07476	4.09226	0.968434	1.59258		4.95919	2.33099	1.91464	1.31845		0.9825	2.6282	3.14977	0.624141	0.596191	0.125279		118	85	90	80	90	80	85	75	95	100	90	85	100	95	70	100	95	100	85	100	95	95	80	95	65	95	100	95	70	75	85	85
	0.244095	0.105395	0.545201	0.482253		1.34356	0.850736	0.645178	1.38698		0.138699	0.492828	0.0926088	0.0629478	0.741805	0.569349		119	95	80	90	95	65	95	70	80	70	75	90	90	90	100	100	70	85	80	95	95	90	75	95	85	90	85	100	85	85	65	85
	0.661651	0.739358	4.53779	5.54765		0.41939	0.434498	6.77373	6.97032		0.0777067	0.0151083	0.106755	1.00986	0.196591	1.79559		120	95	85	75	85	90	95	85	90	90	90	100	95	80	85	95	70	80	80	85	95	80	70	80	100	95	90	75	95	100	70	75
	1.34849	1.39481	1.56862	1.91171		0.429055	1.00755	2.1343	2.1564		0.0463183	0.578498	0.0692043	0.343094	0.0220982	0.186681		121	85	95	90	85	90	90	85	85	95	80	80	95	85	90	90	100	60	70	75	95	100	70	90	90	85	75	75	90	85	80	70
	0.762133	0.362916	0.573449	0.59887		1.11857	0.82454	0.880783	0.995766		0.399217	0.294034	0.204842	0.0254215	0.114983	0.00435153		122	90	95	95	95	90	65	95	90	75	85	75	75	85	85	90	95	95	85	85	95	75	80	70	90	95	90	85	90	60	85	95
	7.32581	6.6595	7.51684	6.90339		9.73666	7.49512	6.96365	6.39561		0.666314	2.24154	0.153674	0.613451	0.568045	0.890817		123	85	60	70	95	95	90	95	80	75	90	70	65	85	90	80	95	65	95	90	90	85	95	75	90	85	95	80	95	80	85	95
	17.5581	17.3488	0.681359	1.02569		16.265	17.2103	1.34157	1.12083		0.209291	0.945223	0.182333	0.344329	0.220741	0.311534		124	80	80	95	100	70	80	85	95	100	90	95	80	85	95	70	90	65	95	85	90	95	90	95	65	90	95	100	90	80	85	95
	2.85215	3.79445	1.75007	1.11272		5.36345	4.69341	0.639885	1.06002		0.942302	0.670037	0.0187716	0.63735	0.420139	0.395808		125	100	95	75	100	90	90	95	90	95	75	80	95	90	85	85	90	100	90	85	70	80	75	90	75	80	75	95	65	95	75	80
	1.55571	2.88595	0.689164	0.732338		1.95962	2.58134	0.953582	0.695686		1.33024	0.621721	1.09295	0.0431742	0.257897	0.515939		126	90	70	90	90	75	95	80	90	85	90	95	75	85	90	90	80	85	90	85	85	90	95	85	85	100	90	100	80	90	90	85
	0.915007	0.827825	6.66714	6.70187		0.423521	1.07313	5.37073	5.02783		0.0871818	0.649613	0.0200942	0.0347263	0.342896	0.0802995		127	85	85	95	90	85	85	85	80	80	80	100	90	85	100	90	85	100	90	95	85	75	65	75	95	95	100	90	70	95	95	85
	4.41423	3.61177	0.853051	1.42927		7.38371	7.18284	0.268722	0.620976		0.802461	0.200862	0.300367	0.576224	0.352254	0.321083		128	95	80	70	70	65	80	75	50	80	80	95	90	70	90	90	100	85	75	90	100	90	100	90	100	85	90	85	90	95	95	70
	1.13472	0.932088	1.86878	2.00726		1.9714	0.632422	3.87339	2.2299		0.20263	1.33897	0.603485	0.138481	1.64349	1.30108		129	95	80	75	75	90	95	85	75	75	95	80	75	95	80	90	100	75	95	75	95	85	100	100	100	70	85	100	90	90	90	90
	0.724941	0.312004	3.16381	2.15808		2.66956	0.49337	4.16445	2.74867		0.412937	2.17619	1.07942	1.00573	1.41577	1.40681		130	95	75	100	80	80	95	100	80	90	95	95	80	85	85	85	70	90	90	95	90	90	95	100	85	90	100	90	60	85	80	85
	9.93182	8.89417	0.959989	0.211707		8.7059	9.81509	1.18987	6.36349		1.03765	1.10919	0.24322	0.748282	5.17362	2.66202		131	90	75	65	95	90	95	95	65	90	95	65	95	95	90	85	75	100	90	95	100	90	95	80	85	80	95	80	85	75	80	75
	1.63042	1.66017	0.848616	0.889504		2.30022	1.31531	1.62581	0.371058		0.029747	0.984912	0.548822	0.0408881	1.25476	0.932901		132	85	95	95	85	80	90	85	90	80	80	95	80	80	85	85	70	85	80	100	80	90	95	95	90	100	70	80	95	80	80	85
	0.768054	0.485313	1.57847	1.35122		0.862653	1.9361	0.424656	5.25518		0.282741	1.07344	0.375798	0.227248	4.83053	0.34667		133	95	50	90	90	95	90	80	80	90	95	90	85	100	75	100	70	80	95	100	80	100	90	75	95	90	100	85	90	85	80	90
	0.762619	0.872228	5.26363	2.98238		5.07379	2.6629	1.12803	5.42723		0.109609	2.41089	0.133683	2.28126	4.29921	0.319479		134	95	85	100	75	70	80	50	100	95	90	95	90	90	90	85	70	85	80	80	95	85	95	95	95	90	100	90	90	70	95	100
	5.21337	5.71387	1.23662	0.498805		4.65563	6.06947	0.391832	1.4397		0.500498	1.41384	2.30316	0.737813	1.04787	1.3097		135	80	85	90	90	65	80	85	90	85	80	100	95	95	100	90	100	75	95	85	85	95	100	75	85	100	95	90	95	100	90	80
	4.60812	4.52802	0.0732327	0.261266		4.27005	4.14218	0.553705	1.47027		0.0800935	0.127874	0.305965	0.188033	0.916566	0.154093		136	100	90	70	95	75	90	95	85	90	85	80	80	85	80	95	100	95	85	100	80	80	100	80	90	85	75	95	100	85	85	95
	0.132646	0.247974	0.684099	0.604148		0.889857	1.50212	0.494708	1.52579		0.115329	0.612261	0.761467	0.0799515	1.03109	0.68888		137	85	95	75	70	95	90	95	75	75	60	80	95	95	85	95	90	80	90	95	80	95	95	85	90	95	90	90	95	80	70	80
	0.845061	0.35169	0.508516	1.0344		0.57376	0.71467	0.283121	0.358929		0.493371	0.14091	0.163034	0.525886	0.0758087	0.280606		138	80	100	95	85	85	80	80	85	100	70	90	90	95	90	80	90	95	85	80	80	85	90	95	95	90	85	85	90	95	85	100
	0.32191	0.575488	0.999162	1.60851		1.22084	0.797024	1.04899	2.81771		0.253578	0.423813	0.634532	0.609345	1.76873	0.269124		139	70	95	85	95	90	95	100	90	80	80	95	90	95	90	90	80	90	85	80	85	90	75	100	85	80	70	70	70	90	90	90
	1.97686	1.43094	2.51811	3.2329		0.983183	4.41487	4.13985	3.51297		0.545922	3.43169	0.923976	0.714788	0.626883	1.11285		140	70	85	80	90	90	75	95	95	95	75	100	75	80	90	95	85	100	95	95	90	90	85	90	75	95	90	85	75	100	95	80
	0.563694	0.961396	4.86953	4.03506		0.464686	1.20933	3.01738	2.70185		0.397701	0.744641	2.23999	0.834472	0.315532	1.2999		141	75	80	75	95	95	95	100	100	90	95	95	90	100	100	80	80	90	85	100	70	85	90	80	85	95	100	90	85	85	75	80
	1.34426	1.68386	5.35407	4.04633		6.44395	2.56829	13.3177	11.5889		0.339599	3.87566	0.336362	1.30774	1.72881	2.15429		142	95	75	85	85	95	85	95	85	80	100	100	100	100	95	95	80	95	90	95	90	100	100	85	80	90	90	90	100	95	95	100
	11.842	10.4985	1.11365	0.472777		7.12594	7.03951	5.11959	1.67201		1.34352	0.0864245	1.71293	0.640878	3.44757	1.19359		143	95	95	80	85	95	85	90	80	90	100	85	100	70	100	95	75	90	75	85	85	95	90	100	90	100	95	85	90	95	85	95
	1.00391	2.00764	0.512871	0.533452		0.895014	0.602461	0.948699	2.19346		1.00373	0.292553	1.5291	0.0205804	1.24476	0.0453503		144	95	85	85	85	95	85	90	95	90	90	95	100	100	95	80	95	95	90	75	90	90	90	80	100	100	100	85	95	70	95	85
	0.280955	0.174041	2.33006	2.66558		1.13381	1.12609	1.55462	1.54321		0.106913	0.00771382	0.536229	0.335518	0.0114116	0.10192		145	75	100	85	100	95	95	90	95	95	85	100	70	95	90	90	100	95	100	90	95	80	90	95	80	95	90	90	85	90	90	75
	3.36307	2.7043	1.68255	2.43994		1.1079	0.468361	1.71515	0.777783		0.658771	0.639537	0.144362	0.757392	0.937363	0.339408		146	80	90	100	100	85	90	70	95	80	70	95	90	95	90	95	100	90	95	85	90	75	95	80	90	100	95	85	90	90	95	80
	2.94459	4.46519	2.87939	3.32023		3.65745	2.40624	3.21088	2.62196		1.5206	1.2512	0.0172732	0.440835	0.588924	1.71954		147	90	100	85	90	75	80	90	80	100	95	80	80	75	85	95	95	90	85	90	85	85	100	90	90	90	60	80	95	75	95	95
	4.80322	5.20548	0.395252	0.221488		4.24534	4.84692	0.771234	0.878337		0.40226	0.601574	0.932093	0.173765	0.107104	1.45473		148	75	75	100	100	95	90	95	95	90	65	80	95	100	90	95	95	85	90	95	70	80	95	85	95	80	85	90	55	85	95	80
	3.14611	3.9711	1.15337	1.02705		1.86724	3.68102	1.03413	1.43459		0.824998	1.81378	4.47995	0.126323	0.400457	1.39569		149	100	95	95	95	95	95	90	95	85	100	90	95	80	90	95	95	80	100	85	95	90	85	75	95	80	75	95	85	95	95	100
	1.7763	1.31078	1.36473	0.459668		19.1526	10.3019	0	4.53764		0.465514	8.85075	6.60804	0.905066	4.53764	1.18923		150	95	90	95	95	95	100	100	85	100	90	100	80	100	80	90	95	100	85	95	70	90	85	95	100	90	80	90	80	95	100	90
	3.08625	1.62031	1.18523	1.71513		3.14716	4.83571	0	1.55969		1.46594	1.68855	1.15903	0.529903	1.55969	0.158648		151	95	90	85	100	95	90	95	85	95	90	95	90	90	90	95	90	95	90	100	95	100	85	100	75	85	90	85	90	80	85	95
	0.400487	0.360509	2.97074	2.06048		0.607799	0.806817	3.71922	1.80257		0.0399785	0.199018	0.221297	0.910257	1.91665	1.57477		152	95	85	80	80	95	90	95	95	100	100	95	90	95	90	75	100	80	80	95	80	90	95	90	80	90	95	90	100	85	85	90
	2.99237	5.96867	3.56347	4.36712		1.02615	1.47173	4.97899	5.54059		2.9763	0.44558	1.33697	0.803649	0.561596	2.95105		153	100	90	90	90	95	95	95	85	85	85	95	80	85	80	100	95	90	80	90	100	90	70	90	80	75	75	85	70	100	90	85
	16.5248	20.1868	1.81376	1.84083		16.2297	13.0027	3.7651	2.48345		3.66197	3.227	2.16764	0.0270717	1.28165	0.433992		154	95	85	100	75	95	65	90	100	85	95	90	90	90	95	90	95	90	95	80	100	95	90	95	95	80	100	100	95	85	95	95
	3.06878	1.92781	8.58925	12.4098		1.69222	3.66281	8.73115	9.00525		1.14097	1.97059	0.7263	3.82058	0.274106	0.990972		155	90	85	85	90	90	100	100	80	90	90	75	80	80	95	85	90	80	85	90	80	90	100	90	85	90	95	80	70	75	100	80
	1.00203	1.54146	5.6176	4.78949		1.05141	1.20592	5.01241	4.32875		0.539429	0.154509	0.0725722	0.828112	0.683662	3.97382		156	95	85	100	85	95	90	75	80	85	95	100	80	95	85	85	95	75	90	80	90	100	90	95	90	85	100	95	60	95	70	95
	6.63205	5.60398	5.40209	3.32105		2.70132	3.74483	4.66583	2.01979		1.02807	1.04351	0.582926	2.08104	2.64605	1.67635		157	80	90	75	100	85	75	90	95	85	90	100	95	85	100	95	85	80	85	95	85	90	90	85	90	85	90	85	90	90	80	90
	15.6355	15.1836	3.23108	3.39596		11.0857	11.9539	4.39926	4.8315		0.451828	0.868289	1.00397	0.164881	0.432236	0.970561		158	95	90	85	75	90	75	90	85	80	90	100	95	100	100	100	85	90	75	100	95	95	90	75	90	90	95	100	95	95	90	80
	0.818518	0.605049	1.39537	1.63305		0.961449	1.07791	3.5913	5.04501		0.213469	0.116462	0.367358	0.237683	1.45371	0.407257		159	95	90	90	90	100	95	90	100	100	85	100	90	85	90	100	95	80	90	95	85	95	90	90	90	85	95	85	100	70	100	95
	0.102116	0.207057	1.19715	2.08046		0.685326	0.37329	1.52563	2.16902		0.104941	0.312037	0.0179527	0.883307	0.643397	0.5529		160	80	95	80	90	85	95	100	85	100	95	100	85	90	100	75	100	80	85	95	85	90	75	90	100	100	95	100	95	95	95	95
	12.9344	14.2961	2.93562	2.02702		4.78812	12.4622	0.286385	0.431438		1.36167	7.67411	3.54708	0.908598	0.145053	0.289473		161	95	95	95	95	85	95	90	90	95	80	95	80	95	75	95	80	80	100	95	95	100	75	90	95	100	75	95	80	90	85	95
	14.4933	14.5897	13.1053	11.6624		14.3545	6.29767	18.8674	17.7345		0.0963406	8.05687	7.21983	1.44291	1.13293	0.672658		162	100	100	90	95	80	80	85	95	95	85	80	60	100	90	100	95	75	75	100	85	90	90	70	95	100	100	95	90	95	95	90
	8.32982	7.00918	0.679965	1.14233		9.54852	8.1732	0.531491	0.199531		1.32064	1.37532	0.57416	0.462361	0.33196	0.25727		163	85	95	90	85	100	95	100	95	90	85	95	95	95	75	100	95	90	90	100	100	80	70	90	90	95	95	95	100	95	80	100
	5.96287	5.6955	15.0884	14.3654		4.90774	3.14473	15.5152	14.527		0.267377	1.76301	1.56932	0.722995	0.988132	0.427839		164	95	75	85	80	85	70	100	100	85	90	100	90	95	90	100	80	90	95	90	85	95	75	85	95	95	85	90	90	95	80	90
	3.87649	4.03896	0.699089	0.999492		9.14519	7.42624	0.375084	0.673623		0.162476	1.71895	0.441131	0.300403	0.298539	0.126662		165	85	90	100	100	90	95	95	90	95	85	85	95	90	85	90	100	85	95	95	95	85	85	90	95	85	95	95	100	80	85	85
	1.45424	1.284	1.48699	1.45614		0.331577	1.69966	0.832105	0.730427		0.170241	1.36808	0.517597	0.030846	0.101678	0.0179135		166	85	90	95	75	95	85	90	95	95	80	95	75	80	95	90	100	95	95	90	85	90	100	100	95	75	85	90	85	75	95	95
	0.601561	0.205256	2.28105	1.77545		5.68436	1.52286	1.13403	0.697715		0.396305	4.16151	0.0238187	0.5056	0.436311	0.416432		167	90	90	85	95	90	100	90	85	95	95	100	90	95	100	70	85	90	95	75	90	90	95	100	95	85	95	90	100	95	85	90
	0.514858	0.954473	23.5338	24.1649		1.43105	3.08211	23.508	23.3159		0.439615	1.65106	0.398827	0.631053	0.192156	2.78146		168	95	95	100	100	100	100	85	95	100	95	90	80	100	90	90	85	100	100	95	95	95	95	90	100	95	85	90	95	95	90	90
	3.39389	3.05586	1.46515	0.777468		10.2649	4.1398	0.585618	0.356467		0.338036	6.12508	6.87723	0.687682	0.229151	0.630036		169	95	100	80	95	100	90	85	95	90	75	80	75	75	100	85	100	95	75	100	90	90	80	90	95	95	95	80	90	90	95	90
	5.86034	6.22845	3.56394	4.18088		3.89354	4.17629	3.55362	2.5199		0.368107	0.282748	0.659275	0.616937	1.03373	0.659823		170	95	95	85	100	95	95	90	90	100	95	85	80	85	95	85	95	100	90	100	85	85	75	65	95	85	70	95	90	95	85	90
	0.0191455	0.103398	0.727462	0.68972		1.8627	1.19719	0.297644	0.745353		0.0842524	0.665514	0.461124	0.0377418	0.447709	0.666959
	0.0940111	0.158618	7.96528	8.03589		0.774842	0.870471	6.46737	7.53538		0.0646069	0.0956286	0.0516668	0.0706068	1.06801	0.22897
	0.162317	0.095885	3.41637	2.80634		1.0935	1.16544	2.56196	2.75695		0.0664324	0.0719347	0.164993	0.610029	0.194992	0.00132989
	2.14998	1.56599	1.48794	1.60506		0.601913	1.49177	1.38715	1.4407		0.58399	0.88986	0.0776236	0.117118	0.0535566	0.214112
	1.9277	2.14771	4.47718	3.78924		0.660625	1.62896	4.16975	4.60019		0.220016	0.968331	0.29336	0.687938	0.430442	0.512531
	1.23087	0.742341	0.715436	1.16128		2.15489	2.50619	0.580587	0.565775		0.488534	0.351295	3.06302	0.445846	0.0148121	0.916859
	0.392142	0.517565	1.19112	1.19135		2.74109	1.03333	0.248681	0.90999		0.125423	1.70776	0.817798	0.000232077	0.661309	0.278302
	2.20609	1.54872	0.575763	0.952742		0.441862	1.28439	1.22969	1.18322		0.657364	0.842523	0.164773	0.376979	0.0464707	0.150282
	0.0774633	0.238284	2.16693	1.77645		0.703152	1.56184	3.5744	4.09763		0.160821	0.858689	0.692523	0.39048	0.52323	1.09497
	0.351742	0.237026	1.38708	1.37425		0.728979	0.796616	2.08071	2.02396		0.114715	0.0676365	0.598887	0.0128314	0.0567524	0.592534
	2.31364	3.65399	2.51541	3.3829		3.94486	1.85856	1.45499	2.04411		1.34035	2.08629	1.72585	0.867492	0.58912	0.613823
	8.26087	11.3283	14.274	15.1889		14.6453	7.97696	17.4668	16.4425		3.06747	6.66833	8.10687	0.914853	1.02432	4.64513
	0.332855	0.988941	4.34852	4.74604		2.03088	0.704895	7.77172	5.83839		0.656086	1.32598	0.146728	0.397514	1.93333	1.96986
	0.620526	0.439234	0.245877	0.153726		1.98766	0.0431223	0.770112	0.409696		0.181291	1.94454	1.16694	0.0921512	0.360417	0.396282
	1.11043	3.33593	4.50309	1.80032		0.465066	0.53841	1.74131	0.424017		2.2255	0.073344	0.46644	2.70277	1.31729	1.17586
	0.628517	0.0512308	6.89432	4.66456		0.646186	0.810432	1.06759	3.37165		0.577286	0.164246	0.117529	2.22977	2.30406	0.578572
	2.48342	4.52261	0.23356	0.236323		1.93188	3.10059	2.43995	1.02554		2.03919	1.16871	1.6253	0.00276344	1.41441	0.284014
	0.77392	0	1.88528	1.44879		2.87229	1.4048	2.553	2.53711		0.77392	1.46749	2.39576	0.436488	0.015888	0.329631
	11.0485	12.3477	1.57384	1.75102		7.33566	9.19403	0.528724	0.213105		1.29921	1.85837	2.48317	0.177175	0.315618	0.248503
	0.532261	1.40917	1.11898	0.235744		0.500737	0.204455	1.08159	3.49515		0.876907	0.296282	0.280359	0.88324	2.41356	0.645813
	2.20689	3.22613	4.56004	3.56984		5.52364	5.65998	5.54953	3.48789		1.01923	0.136336	2.2555	0.990207	2.06164	2.08104
	0.985139	0.89492	3.71109	3.92151		3.39057	0.41667	0.824547	0.991272		0.0902197	2.9739	1.86568	0.210419	0.166724	0.665715
	0.272524	0.584824	4.27709	4.21646		0.225099	0.0979412	5.43458	5.57147		0.3123	0.127158	0.0924075	0.0606326	0.136892	0.325894
	2.36466	1.41236	0.965499	1.33384		2.35562	3.12426	2.72067	2.66868		0.952303	0.768647	2.26774	0.368338	0.0519895	0.0912701
	1.09394	0.65507	2.20002	1.52142		1.79729	0.714989	0.737187	0.518643		0.438867	1.0823	0.208146	0.678598	0.218544	0.0377866
	3.46765	3.92477	4.58884	4.18169		4.19618	4.24868	3.03876	2.48197		0.457121	0.0525019	0.377512	0.407154	0.556792	2.3292
	9.69514	7.25279	16.9904	15.6365		8.31248	5.89301	15.7499	15.3896		2.44235	2.41947	2.96575	1.35396	0.360305	1.25963
	4.16842	4.51084	3.00639	2.81344		2.76376	3.09456	3.26169	1.88237		0.342413	0.330804	0.552164	0.192944	1.37932	0.64922
	6.36894	5.2434	28.9491	30.9419		6.06186	7.08003	36.8152	35.7593		1.12554	1.01817	0.763925	1.99272	1.05597	2.3104
	14.957	16.5673	2.94933	3.32228		13.4238	11.447	6.26007	7.74981		1.61027	1.97675	0.488713	0.372947	1.48975	0.885117
	4.06706	3.40193	4.66024	5.00588		4.46011	5.13316	7.39821	7.33467		0.665131	0.673056	1.17492	0.345644	0.0635368	0.00669689
	0.569352	0.321064	6.85737	6.59017		2.64611	1.98406	11.7922	6.85384		0.248288	0.662051	1.551	0.2672	4.93838	3.88083
	1.01565	0.58874	1.90505	1.58077		1.40073	4.14172	2.11199	1.66122		0.426912	2.74099	2.2899	0.324273	0.450779	1.9474
	4.29709	3.95071	0.382685	0.81471		2.58736	4.49917	0.518201	1.10278		0.346372	1.91181	0.917006	0.432025	0.584574	0.52631
	1.10032	0.447529	1.74803	1.95584		1.34798	2.15966	1.83403	2.18194		0.652794	0.811683	0.0768039	0.207808	0.347916	0.352042
	0.554272	0.464539	1.16121	0.762528		1.49905	0.99886	0.592722	1.00679		0.0897336	0.500185	0.487513	0.398683	0.414066	1.2598
	0.511578	0.354626	1.50687	1.15459		0.947416	0.388614	3.63247	1.65811		0.156952	0.558802	0.326317	0.352276	1.97436	0.271008
	3.13372	2.91516	9.63616	9.79087		2.95616	2.89701	10.9567	8.38456		0.218561	0.0591563	0.838191	0.154714	2.57215	1.31591
	0.541041	0.19327	0.830455	2.38993		1.10117	0.67853	1.6993	2.09182		0.347771	0.422643	0.367038	1.55947	0.392519	0.730097
	0.48357	0.114031	1.66594	2.38193		0.615131	0.583437	3.21854	3.60447		0.369539	0.0316941	0.954991	0.715989	0.385929	0.0114721
	0.277366	0.258609	10.0596	11.3436		1.51529	2.54622	5.22749	5.27976		0.0187572	1.03093	0.589917	1.28404	0.052267	0.851729
	1.91281	2.04262	0.60737	0.518024		1.60109	0.503922	1.62658	2.08056		0.129802	1.09716	0.662381	0.0893454	0.45398	0.522891
	2.29312	1.77148	0.748313	0.60462		0.122891	0.760166	0.358826	0.720984		0.521641	0.637275	1.29926	0.143693	0.362159	0.491284
	6.64646	4.94353	2.37157	3.19046		2.16336	5.08299	5.28452	4.15642		1.70293	2.91963	2.17687	0.818889	1.1281	2.21468
	4.15627	4.83667	3.77207	2.76674		4.66307	3.74548	1.91059	3.25678		0.680392	0.917583	0.418025	1.00533	1.34619	1.06474
	0.914523	0.653766	4.27616	3.12677		1.53284	0.289109	3.0304	3.86863		0.260756	1.24373	0.156049	1.14939	0.83823	0.230596
	4.60488	4.72694	5.2996	2.9595		0.891192	4.30791	1.91151	1.96604		0.122062	3.41672	0.089766	2.3401	0.0545233	1.29325
	0.737717	0.351747	4.38455	4.45388		3.01561	3.37032	7.14662	7.63206		0.38597	0.354713	1.52071	0.069325	0.485438	0.307827
	6.05108	6.31124	3.48967	3.32223		2.8728	2.8982	4.35259	5.39384		0.260161	0.025401	0.108227	0.167443	1.04125	0.70733
	6.24351	4.90676	7.25835	7.29223		0.422515	1.08222	2.5758	1.09781		1.33675	0.659708	0.160305	0.0338839	1.47799	0.316223
	1.01568	0.893449	3.57931	2.70655		0.43074	0.516903	1.7304	3.17869		0.122235	0.0861632	0.403677	0.872768	1.44829	0.00172006
	4.61331	5.1828	10.7843	8.19102		4.42607	7.92278	8.72854	11.5556		0.569487	3.49672	2.3771	2.59326	2.82707	0.987868
	2.25925	2.66612	10.8652	12.1204		1.15432	6.06998	5.6223	5.25027		0.406876	4.91566	0.288844	1.25517	0.372038	0.164482
	1.29808	1.12915	1.02455	0.628594		9.04085	3.05793	1.05638	0.807402		0.168924	5.98292	0.457711	0.395961	0.248976	0.685978
	2.72077	3.77034	6.08013	5.27422		2.47045	5.40178	2.48078	3.37321		1.04956	2.93132	1.22187	0.805914	0.89243	2.26309
	2.25846	1.39212	6.78585	9.04712		1.25807	0.871027	4.5896	3.41254		0.866335	0.387046	0.0831557	2.26127	1.17706	1.88578
	2.98018	2.27807	2.34076	3.01805		2.75437	1.87427	2.71436	2.42013		0.702112	0.880101	1.57019	0.677288	0.294233	0.55606
	0.439225	0.845963	0.354073	0.609131		1.00158	0.0812815	4.15154	4.91925		0.406738	0.920296	0.555982	0.255058	0.767712	1.02166
	1.76668	0.956562	0.175461	0.230728		2.06151	1.80088	0.625367	0.38601		0.810114	0.260632	1.37887	0.055268	0.239357	0.062359
	0.469927	0.498159	4.53794	5.89878		1.01054	2.29117	1.28585	2.06653		0.0282321	1.28063	1.62546	1.36084	0.780672	0.311181
	0.222325	0.365203	0.29458	0.388733		1.90155	0.409606	0.578861	1.01517		0.142878	1.49194	0.735797	0.0941533	0.436314	0.160794
	0.127421	0.0230242	3.23647	2.3235		0.361466	0.222076	2.29637	1.74325		0.104397	0.13939	0.356342	0.912973	0.553122	1.32888
	0.764116	0.609019	6.78486	8.14179		0.881213	1.40852	6.23177	8.97823		0.155097	0.527305	0.152514	1.35693	2.74646	0.479858
			5.8244	5.27845				5.80388	5.10279					0.545953	0.701093	0.00702759
			4.52959	4.63058				8.41323	7.30002					0.100983	1.11321	0.724572
			1.11743	0.77742				1.38688	2.09067					0.340007	0.703795	0.243395
			2.42973	3.12857				4.41327	3.59677					0.698844	0.816503	0.20807
			1.20063	1.00839				0.849563	0.671014					0.192243	0.178549	0.202807
			15.3466	12.5629				7.55994	7.88595					2.7837	0.326013	1.17476
			5.35794	4.70044				7.09643	4.3161					0.657493	2.78033	0.64177
			0.443348	0.607013				17.18	14.9493					0.163664	2.23068	3.43822
			2.86809	2.39298				3.02553	2.49878					0.475109	0.526756	0.749985
			1.663	1.47021				0.883684	1.26795					0.192789	0.384271	0.0666959
			3.22658	3.46846				1.63348	1.45057					0.241881	0.182916	0.683639
			6.48841	5.46306				6.61945	6.82652					1.02536	0.207069	0.681532
			4.78819	6.92731				0.436718	1.0859					2.13912	0.649179	1.41963
			4.88637	4.06386				4.27789	3.37704					0.822518	0.900857	1.42294
			2.95471	3.25552				3.66167	3.32287					0.300805	0.338804	0.341197
			2.11031	1.99011				1.70791	1.72431					0.120203	0.0163998	0.12075
			5.24405	5.76606				4.6284	6.39658					0.522007	1.76818	0.768017
			15.9762	17.0253				17.8988	16.9713					1.04909	0.927496	2.06938
			2.1843	2.33574				1.35239	1.73482					0.151436	0.382428	0.135185
			0.919894	1.28457				2.12506	1.97323					0.364672	0.151829	0.140972
			1.22651	1.18392				0.981586	1.59912					0.0425913	0.617535	0.00701427
			3.16861	3.40882				2.29924	1.38289					0.240213	0.916351	1.15635
			0.792486	0.666636				8.01434	5.46394					0.125849	2.5504	0.128279
			3.87629	4.13314				9.42154	7.83256					0.256856	1.58898	0.230787
			8.03682	8.00506				8.36557	7.54569					0.0317562	0.819882	1.48679
[truncated: 774 more columns]
