# Supplementary material for: Suppressed prefrontal neuronal firing variability and impaired social representation in IRSp53-mutant mice
Source: eLife. 2022 Nov 1;11:e74998. doi: 10.7554/eLife.74998 (PMC9662818; doi:10.7554/eLife.74998)
Supplement: Figure 5—figure supplement 1—source data 1. — The excel file contains the numerical data used to generate Figure 5—figure supplement 1A–M. [file elife-74998-fig5-figsupp1-data1.xlsx]

## Sheet: Fig5_S1
	Fig 5_S1A	Min FR		Fig 5_S1B	Max FR		Fig 5_S1C	Firing rate range						Fig 5_S1D	FR range		Fig 5_S1E	FR range		Fig 5_S1F	FR range		Fig 5_S1G	FR range		Fig 5_S1H	Sigma														Fig 5_S1I	Sigma		Fig 5_S1J	Sigma		Fig 5_S1K	Sigma
	WT	KO		WT	KO		WT			KO				WT	KO		WT	KO		WT	KO		WT	KO		WT							KO								WT	KO		WT	KO		WT	KO
	0	0		8	7.66667		E-E	First S-O	Second S-O	E-E	First S-O	Second S-O		2.66667	6.66667		8	7.66667		4.33333	5		4.33333	4.66667		0.25	0.5	1	2	3	4	5	0.25	0.5	1	2	3	4	5		0.539674	1.37162		0.99639	1.257		0.649289	1.27182
	3.33333	0		26.3333	7.66667		8	4.33333	4.33333	7.66667	5	4.66667		14.3333	4.33333		21.3333	6		20	7.66667		16.5	5.66667		1.68597	1.3078	1.09086	0.913157	0.839027	0.765767	0.707169	2.02026	1.64163	1.39397	1.22855	1.1552	1.09116	1.05847		2.49725	0.969084		3.66866	0.963766		3.0608	1.17598
	0	0		14.6667	17.3333		21.3333	20	16.5	6	7.66667	5.66667		4.66667	10.3333		14.3333	8		9	11.3333		11.6667	17.3333		7.80017	6.01376	4.66942	3.77532	3.2542	3.04789	2.89359	2.07368	1.69388	1.42152	1.21522	1.11086	1.04539	0.968107		0.594025	2.09338		2.60754	1.53181		1.62182	2.16212
	0	0		20	7		14.3333	9	11.6667	8	11.3333	17.3333		15	16.3333		20	7		12.6667	7		9	7		4.59973	3.94927	3.46749	3.13448	3.0096	2.93454	2.89179	4.5999	3.80031	3.25312	2.86665	2.70624	2.61387	2.52155		2.58951	2.40781		4.09758	1.57442		2.53783	1.46323
	0	0		15.3333	10		20	12.6667	9	7	7	7		6.33333	9.66667		15.3333	10		13	9.66667		10.6667	10		6.09163	5.3542	4.85704	4.52102	4.33564	4.24858	4.16688	2.89073	2.44567	2.10657	1.79524	1.61754	1.50223	1.46663		1.38479	2.18555		2.90598	1.82771		2.91976	2.00254
	0	0		14.6667	11.3333		15.3333	13	10.6667	10	9.66667	10		10	8.5		14	11.3333		14.6667	9.66667		13.6667	9		4.01839	3.51343	3.19197	2.93463	2.80375	2.71368	2.65913	3.14731	2.63731	2.29757	1.98774	1.82573	1.73937	1.65245		2.03527	2.07909		2.81223	1.93912		3.6021	1.61681
	0	0		8.66667	10.3333		14	14.6667	13.6667	11.3333	9.66667	9		6	14.3333		8.66667	8.33333		5.33333	10.3333		6.66667	7.33333		5.54539	4.70294	4.10593	3.60815	3.33659	3.17153	3.00418	3.75768	3.0763	2.52755	2.07776	1.8505	1.72349	1.57814		1.31053	2.62098		1.89403	1.40561		0.813153	1.88035
	0	0		8	6		8.66667	5.33333	6.66667	8.33333	10.3333	7.33333		10.6667	4		8	5.66667		5	6		5.33333	5.66667		2.39229	1.99249	1.72579	1.51193	1.40004	1.31208	1.24831	2.92107	2.46303	2.08082	1.73483	1.56613	1.40649	1.36219		2.48828	0.693605		1.65988	0.916582		0.695752	1.14006
	0	1		12	20.6667		8	5	5.33333	5.66667	6	5.66667		9	19.6667		11.6667	19.6667		9.33333	18		6.66667	17		2.17739	1.77329	1.53007	1.36338	1.26271	1.1869	1.16208	2.21027	1.80337	1.50827	1.23642	1.11797	1.02368	0.960424		1.88725	3.45571		2.33774	3.36187		1.65644	2.80554
	0	0		8.66667	9.5		11.6667	9.33333	6.66667	19.6667	18	17		3	14.6667		6	8.66667		8.66667	4.33333		8.66667	9.5		4.30987	3.49495	2.88094	2.3402	2.10961	1.94428	1.8612	6.25459	5.1523	4.24327	3.59647	3.24544	3.10428	2.94728		0.353819	3.24175		0.763509	1.64957		1.45548	0.435466
	0	0		7.33333	23.6667		6	8.66667	8.66667	8.66667	4.33333	9.5		7.66667	7.66667		5.66667	20.3333		6.66667	22.6667		7.33333	21.3333		1.93829	1.61708	1.40031	1.25138	1.1728	1.11215	1.09229	2.1835	1.84667	1.63253	1.42803	1.31797	1.22486	1.14354		1.52384	1.82033		0.896468	3.43325		1.42363	3.89109
	0	0		9.66667	9.33333		5.66667	6.66667	7.33333	20.3333	22.6667	21.3333		2.33333	3.33333		9.66667	7.33333		7	6.33333		7	9.33333		2.46286	2.04489	1.78168	1.56429	1.47266	1.41616	1.35708	7.74268	6.72034	5.97176	5.36577	5.08596	4.91615	4.75119		0.356768	0.511118		2.13485	1.14705		1.51145	1.29373
	0	0.333333		5.33333	16.3333		9.66667	7	7	7.33333	6.33333	9.33333		4.66667	13.6667		5.33333	16		5	14.3333		5.33333	15.5		3.52225	2.9906	2.66649	2.43648	2.32331	2.2546	2.21818	2.71937	2.23191	1.85465	1.54146	1.35187	1.26217	1.16316		1.00959	2.62931		0.944034	3.40204		0.961241	2.82263
	0	0		8.33333	15		5.33333	5	5.33333	16	14.3333	15.5		8.33333	10		5.66667	11		8	11.6667		8.33333	14.3333		1.86279	1.50153	1.25846	1.05471	0.975404	0.935953	0.881332	5.85483	4.79639	4.04199	3.46004	3.09509	2.92677	2.74268		1.43191	2.09512		1.29553	2.45606		1.66593	2.22546
	0	0		11	15		5.66667	8	8.33333	11	11.6667	14.3333		5	8		10	13.6667		11	12.6667		11	15		3.19305	2.54392	2.15021	1.81859	1.65714	1.5607	1.47803	4.94745	4.14163	3.57092	3.14034	2.89104	2.71623	2.61744		1.03449	1.49407		2.01794	2.20329		2.16513	2.44869
	0	0		13.3333	9.33333		10	11	11	13.6667	12.6667	15		10.3333	1.66667		11	4.66667		13.3333	4.66667		10.6667	9.33333		4.1757	3.33357	2.78019	2.37189	2.20551	2.07985	1.99943	4.70297	4.02248	3.52108	3.08406	2.83947	2.6325	2.53197		1.81018	0.297774		2.0748	0.691676		2.49623	0.901532
	2.33333	0		21.6667	15.6667		11	13.3333	10.6667	4.66667	4.66667	9.33333		11	9		18	11.6667		19	15.6667		18	15		4.60506	3.72898	3.1284	2.59509	2.38306	2.20249	2.1379	1.97956	1.65563	1.42725	1.23888	1.15192	1.07305	1.05036		2.05469	2.55647		2.83645	2.62542		3.15512	3.41695
	0	0		10	15.3333		18	19	18	11.6667	15.6667	15		7	9		10	11.6667		6.33333	15		9.66667	15.3333		7.14798	5.42804	4.18139	3.28628	2.95367	2.65706	2.61213	4.68935	4.15004	3.78659	3.42726	3.27405	3.15393	3.03793		1.18229	1.72238		1.58693	2.45129		1.4031	2.90762
	0	0		6.33333	16.3333		10	6.33333	9.66667	11.6667	15	15.3333		4.33333	14.3333		6.33333	10.6667		4.66667	16.3333		5.66667	16		3.24101	2.57424	2.10174	1.72058	1.58613	1.45033	1.39838	4.74376	4.05754	3.54439	3.10516	2.89353	2.76285	2.65732		0.837522	3.82453		1.00804	2.43316		0.966633	3.77317
	0	0		11.3333	5.33333		6.33333	4.66667	5.66667	10.6667	16.3333	16		2	2.66667		11.3333	5.33333		7	4.33333		7.33333	4		1.97234	1.57242	1.32393	1.13648	1.05911	0.981552	0.928855	5.18757	4.56701	4.12555	3.80229	3.66117	3.56279	3.50179		0.38122	0.531997		1.89829	1.04428		1.19595	0.928333
	0	0		7.33333	20.3333		11.3333	7	7.33333	5.33333	4.33333	4		0.666667	13.6667		6.66667	18.6667		7.33333	20.3333		6	18.6667		2.15549	1.89761	1.73107	1.56867	1.45602	1.40098	1.37577	2.09776	1.66956	1.32153	1.05417	0.923857	0.849133	0.804525		0.0867472	2.37469		0.898154	3.85809		0.975597	4.65707
	3	0		19.3333	7.66667		6.66667	7.33333	6	18.6667	20.3333	18.6667		11.3333	5.33333		13.3333	5		16.3333	7		12	7.66667		1.96217	1.60043	1.34144	1.12095	1.02141	0.946555	0.908355	6.28172	5.58588	4.99423	4.42353	4.04311	3.8339	3.53101		1.97615	0.93319		2.19736	0.704184		2.64868	0.953208
	0	0		6.33333	19.3333		13.3333	16.3333	12	5	7	7.66667		4.33333	10.6667		6.33333	14.3333		4.5	13.6667		4.66667	19.3333		6.57221	4.83108	3.65158	2.72603	2.38929	2.11591	1.98315	1.92955	1.54596	1.23835	1.00826	0.913882	0.815478	0.72072		0.710907	1.45565		1.1752	2.2515		0.727765	1.86516
	0	0		7.66667	14.6667		6.33333	4.5	4.66667	14.3333	13.6667	19.3333		6.66667	5.33333		6.33333	10		7.66667	14.6667		5.33333	6		1.64561	1.36844	1.17501	1.00216	0.918562	0.86429	0.816255	4.30765	3.82035	3.4104	2.96962	2.59888	2.42275	2.27417		1.54895	0.776027		0.867746	1.31801		1.07522	1.75463
	0	0		15	16		6.33333	7.66667	5.33333	10	14.6667	6		8	12.3333		15	16		14.6667	11.3333		13.6667	15.3333		1.77817	1.44638	1.22464	1.08451	1.01578	0.983347	0.917278	2.79121	2.32371	1.91667	1.61432	1.41417	1.26796	1.12823		1.68825	2.11308		3.09521	1.96502		2.68189	1.81115
	2	0		20.6667	14.6667		15	14.6667	13.6667	16	11.3333	15.3333		9.66667	21.3333		16.3333	10		17	13.3333		17.6667	14.6667		4.79242	4.15906	3.60249	3.07872	2.80954	2.65592	2.40552	3.26005	2.85518	2.50522	2.15653	1.86864	1.68467	1.61324		1.66346	3.93249		3.39154	1.6813		3.38085	2.56368
	0	0		13.3333	11.3333		16.3333	17	17.6667	10	13.3333	14.6667		10.6667	10		12	11.3333		12.6667	10.6667		13.3333	6.33333		6.25546	5.16383	4.35545	3.71244	3.42941	3.22976	3.07922	3.98726	3.26531	2.75976	2.35894	2.1976	2.05684	2.00636		2.19872	1.66837		2.45528	1.86755		3.0457	2.28852
	0.666667	0		21.6667	11		12	12.6667	13.3333	11.3333	10.6667	6.33333		16	2.66667		17	11		20	9.66667		20.3333	5		4.52031	3.85271	3.43499	3.10259	2.96322	2.83135	2.73321	3.57248	2.96623	2.45828	2.07127	1.84648	1.67622	1.6138		2.8939	0.511499		2.95165	1.2997		3.65806	1.69038
	0	0		26	7.66667		17	20	20.3333	11	9.66667	5		14.6667	4		22.6667	4.33333		26	7.66667		23.3333	6		7.22743	6.13025	4.97756	4.02741	3.44594	3.08686	2.95238	2.49496	2.07943	1.78004	1.47256	1.34079	1.22026	1.19434		2.24826	0.802761		4.37454	0.62773		3.8835	1.16917
	0	0		9.66667	25.6667		22.6667	26	23.3333	4.33333	7.66667	6		7.33333	12.6667		9.5	23		9.33333	24.3333		9.66667	25.6667		6.84927	5.99661	5.30282	4.64976	4.17228	3.68002	3.40666	1.85967	1.50764	1.24828	1.05776	0.930176	0.883015	0.799384		1.30015	2.8087		1.61741	3.93139		2.00578	5.68826
	0	0		13.6667	6.66667		9.5	9.33333	9.66667	23	24.3333	25.6667		9	11.6667		13.3333	4.66667		10.6667	6.66667		9.66667	3.66667		3.22975	2.5982	2.15476	1.84256	1.72835	1.64656	1.61812	6.35443	5.64809	5.17357	4.76831	4.51943	4.38271	4.23054		1.5169	2.09424		2.44039	0.736931		1.86202	1.10087
	0	0		12	4.66667		13.3333	10.6667	9.66667	4.66667	6.66667	3.66667		10.6667	4.66667		11	4.66667		12	3.33333		11.6667	3		4.26977	3.45343	2.88584	2.45943	2.23755	2.05183	1.99651	1.98827	1.54512	1.22003	0.99308	0.879462	0.823527	0.763015		1.91738	0.845068		2.06621	0.840507		2.27193	0.626951
	0	0		7.66667	12		11	12	11.6667	4.66667	3.33333	3		4	3.66667		6.66667	12		7.66667	11		7	8		4.64932	3.71473	3.0119	2.43225	2.22026	2.04495	1.87441	1.75915	1.33549	1.02049	0.771608	0.680073	0.616646	0.582617		0.538772	0.715297		1.07788	2.30877		1.23995	1.81148
	0	0		5	8.33333		6.66667	7.66667	7	12	11	8		2.66667	4.33333		4	8.33333		5	6		3.66667	6.66667		2.0786	1.77663	1.54961	1.36089	1.27588	1.19461	1.10183	3.48183	2.9819	2.51683	2.05245	1.82978	1.68151	1.51587		0.505463	0.602216		1.01421	1.44806		0.9055	1.28286
	0	0		8	13.6667		4	5	3.66667	8.33333	6	6.66667		3	9.33333		3	11.6667		8	13.6667		7.33333	8		2.02641	1.54481	1.25609	1.03078	0.921412	0.857546	0.820303	2.59213	2.07966	1.7222	1.44942	1.28469	1.19282	1.1437		0.576679	1.38437		0.414401	2.54943		1.31295	2.67263
	0	0		10.6667	8.66667		3	8	7.33333	11.6667	13.6667	8		15.3333	10.6667		8.33333	8.66667		10.6667	6.33333		9.66667	7.66667		2.06884	1.6614	1.43472	1.26299	1.17355	1.13492	1.09092	4.25941	3.62465	3.13047	2.67245	2.44417	2.22525	2.13032		3.90074	1.78337		1.43232	1.63477		2.19394	1.11469
	0	0		9.33333	15.6667		8.33333	10.6667	9.66667	8.66667	6.33333	7.66667		6	10.3333		8.66667	11.6667		9.33333	14.6667		8.33333	15.6667		2.64812	2.32683	2.07714	1.8808	1.76767	1.65441	1.61736	3.54647	2.68721	2.11302	1.69238	1.51947	1.43987	1.33724		0.871228	2.17469		1.67577	2.31344		1.42716	2.82077
	0	0		8	8.66667		8.66667	9.33333	8.33333	11.6667	14.6667	15.6667		3	12.3333		4	5		8	7.66667		7.33333	8.66667		2.94993	2.55069	2.11857	1.69407	1.41706	1.2825	1.10059	5.35874	4.32468	3.55883	2.94587	2.65982	2.49121	2.35708		0.471944	2.81878		0.48966	0.810892		1.57463	1.68927
	0	0		7.33333	6.66667		4	8	7.33333	5	7.66667	8.66667		6	2.66667		4.33333	2.66667		7.33333	2.33333		7.33333	6.66667		2.18035	1.82811	1.54692	1.30842	1.22803	1.14179	1.09733	2.72271	2.23462	1.90285	1.63728	1.5246	1.46346	1.42792		1.23068	0.447525		0.724907	0.433744		1.22374	0.523595
	0	0		10	5		4.33333	7.33333	7.33333	2.66667	2.33333	6.66667		12	3.66667		9.66667	2		9	3.66667		10	5		2.1037	1.73211	1.43913	1.18161	1.06229	0.97277	0.915275	1.83471	1.38868	1.05128	0.846119	0.74753	0.702107	0.635338		2.16287	0.929753		1.78099	0.289096		1.651	0.539963
	0	0		14.3333	13		9.66667	9	10	2	3.66667	5		14	6.33333		14.3333	8.33333		9.66667	12		10	13		3.85207	3.11416	2.56073	2.07404	1.84224	1.68282	1.58056	1.51465	1.21327	1.02568	0.892206	0.83348	0.776052	0.746222		2.91828	1.54658		2.34625	1.76536		2.21651	1.94492
	0	0		22	25		14.3333	9.66667	10	8.33333	12	13		13.6667	21.6667		21.6667	24.6667		17	19		19	23		4.30543	3.60694	2.9929	2.46993	2.23275	2.00349	1.9097	3.64466	3.03642	2.65131	2.32405	2.16581	2.02806	1.98256		2.66222	4.28608		4.7371	4.63078		3.894	3.16706
	0	0		10.5	12.6667		21.6667	17	19	24.6667	19	23		7.66667	8.33333		10.5	8.66667		7.66667	12.6667		8.33333	9.66667		7.16228	6.2841	5.54167	4.83846	4.43552	4.18246	3.9266	7.4502	6.65232	6.13	5.67246	5.45437	5.29935	5.18202		1.46731	1.29159		2.14222	1.11893		1.28259	2.38135
	0	0		6	15		10.5	7.66667	8.33333	8.66667	12.6667	9.66667		11.3333	1.33333		4	9		4.33333	15		6	10		3.14956	2.67276	2.28766	1.95796	1.79706	1.67885	1.56647	4.12851	3.19749	2.55215	2.0994	1.88591	1.78268	1.66459		2.26448	0.181093		0.897086	0.915116		0.771261	3.08314
	0	0		19.3333	12		4	4.33333	6	9	15	10		17.6667	18.6667		19.3333	11.3333		14.6667	10.6667		13.6667	10.3333		2.15407	1.67768	1.32617	1.09454	0.900497	0.834126	0.755861	3.98207	3.47375	3.11468	2.84074	2.72399	2.6395	2.58909		3.39365	3.62133		3.92993	1.96785		2.79813	1.83837
	0	0		23.6667	20		19.3333	14.6667	13.6667	11.3333	10.6667	10.3333		16	6		20	20		22.6667	15		18	12.3333		5.48825	4.69793	4.07719	3.51098	3.22467	3.08656	2.9566	3.92028	3.27234	2.85891	2.56486	2.44412	2.36799	2.29928		3.39675	1.20189		4.24086	4.53751		4.75515	2.66237
	0	0		15.6667	6.33333		20	22.6667	18	20	15	12.3333		10.6667	5		14	3.33333		10	6.33333		15.6667	5.66667		7.06322	6.17778	5.54853	4.87916	4.53138	4.18927	4.0267	5.23299	4.54808	4.08762	3.69095	3.44495	3.32963	3.20565		1.78656	0.899835		1.87358	0.513701		1.58843	0.992035
	0	0		26	7.33333		14	10	15.6667	3.33333	6.33333	5.66667		20.3333	5.33333		25	7.33333		21	7		26	6		3.64166	3.2688	2.91901	2.60666	2.43075	2.26419	2.15804	2.06888	1.59665	1.27999	0.982163	0.839819	0.725086	0.654407		3.63891	1.12131		5.36226	1.38414		5.46412	1.67448
	0	0		26	13.3333		25	21	26	7.33333	7	6		17.6667	11		26	13		21.6667	13.3333		22.6667	12		6.64478	6.19577	5.77851	5.32433	5.02328	4.71523	4.47356	2.62692	2.12316	1.80248	1.55621	1.47522	1.40746	1.36426		4.66079	2.88814		5.43175	2.81239		4.83201	2.72114
	0	0		27	15.3333		26	21.6667	22.6667	13	13.3333	12		17.6667	8		27	15.3333		17.3333	7		17	6.33333		7.68581	6.93222	6.39834	5.88902	5.61244	5.37197	5.17888	4.47417	3.83689	3.347	2.94514	2.72324	2.604	2.4705		4.16056	1.97522		5.87488	2.23725		3.71785	0.929956
	0	4		21.3333	24.3333		27	17.3333	17	15.3333	7	6.33333		10.6667	21.3333		21.3333	16.3333		19	19.6667		20.6667	20.3333		7.42865	6.7143	6.1511	5.64996	5.43758	5.21749	5.03923	2.37685	2.02561	1.78118	1.61154	1.53838	1.48667	1.36482		1.74082	4.13459		3.52521	2.82238		4.181	3.37751
	0	0		8.33333	14.3333		21.3333	19	20.6667	16.3333	19.6667	20.3333		5.66667	4.33333		8.33333	11		5	6.66667		6	14.3333		6.11379	5.31581	4.69035	4.1366	3.87695	3.64131	3.42409	7.78514	5.88721	4.56292	3.65271	3.35254	3.09183	3.02859		1.16159	0.828884		1.45885	1.44414		0.887208	1.15325
	0	0		8.33333	27		8.33333	5	6	11	6.66667	14.3333		1.33333	9.66667		8.33333	20		4.33333	27		4	20.6667		2.43281	1.99943	1.63598	1.33166	1.19454	1.06875	1.02655	3.28926	2.59265	2.14768	1.86977	1.722	1.67018	1.66462		0.187177	2.1909		1.59045	4.59404		0.691791	4.79227
	0	0		8.66667	13.3333		8.33333	4.33333	4	20	27	20.6667		6	5.66667		4.33333	5.33333		8	13.3333		8.66667	8.66667		2.16827	1.82467	1.53852	1.27782	1.14972	1.05557	0.981019	6.98009	6.04875	5.36052	4.96601	4.7437	4.57156	4.4207		1.35664	0.968625		0.668817	1.07215		1.45234	1.23476
	0	0		15	13.3333		4.33333	8	8.66667	5.33333	13.3333	8.66667		4	3		15	5.33333		11.6667	12.6667		10	12.6667		2.42343	1.99721	1.64631	1.33614	1.18647	1.07018	1.02929	2.7475	2.19925	1.85303	1.61175	1.48794	1.44425	1.4103		0.772398	0.590784		2.4099	0.727944		1.80798	1.83058
	0	0		11.6667	5.5		15	11.6667	10	5.33333	12.6667	12.6667		10.6667	5		11.6667	5.33333		10.3333	5.5		8.66667	4.33333		3.75721	3.19144	2.73871	2.29897	2.0628	1.91794	1.81772	5.10901	4.22242	3.69065	3.37785	3.27423	3.21178	3.15474		2.18452	0.914329		2.32161	0.914903		1.76173	0.971056
	0	0		6.33333	6.33333		11.6667	10.3333	8.66667	5.33333	5.5	4.33333		7	4		4.66667	6.33333		4	3.5		6.33333	6.33333		3.80417	3.23305	2.76195	2.31001	2.14288	1.98437	1.90781	1.97221	1.50618	1.20986	1.00715	0.893347	0.853275	0.79046		1.49856	0.671374		0.702976	1.47531		0.696418	0.709749
	0	0		17.6667	11.3333		4.66667	4	6.33333	6.33333	3.5	6.33333		15.3333	10.3333		16	10.6667		17	10.6667		17.6667	9.33333		1.62389	1.28556	1.05649	0.869707	0.772365	0.711812	0.671503	2.50182	1.94403	1.60162	1.34338	1.26409	1.19478	1.17671		2.88916	2.19104		3.66589	1.80252		3.42451	2.08874
	0	0		17.3333	7		16	17	17.6667	10.6667	10.6667	9.33333		10	14.6667		17.3333	7		10	7		8.66667	5		6.6056	5.51662	4.66256	4.01352	3.63523	3.36647	3.19395	4.5047	3.49994	2.78467	2.25817	1.97611	1.88526	1.77078		1.42147	3.06668		3.76841	0.942866		1.32654	0.749281
	0	0		18.6667	7.66667		17.3333	10	8.66667	7	7	5		13.6667	5.66667		18.6667	5		13.6667	7.66667		15	7.66667		3.8333	3.4973	3.2099	2.92869	2.81783	2.681	2.64525	1.99676	1.52002	1.18839	0.927628	0.793044	0.715224	0.659249		2.74824	1.20162		3.97426	1.16835		2.61123	1.01933
	0	2		17.6667	20		18.6667	13.6667	15	5	7.66667	7.66667		9.66667	15.3333		10.6667	16		17.6667	16.3333		14	17.6667		5.68947	4.88319	4.2236	3.63681	3.21454	3.05076	2.86901	2.59348	1.99701	1.58183	1.30167	1.18435	1.11945	1.08717		1.9809	3.01718		1.62556	2.70159		3.80861	3.29355
	0	0		9.66667	8.33333		10.6667	17.6667	14	16	16.3333	17.6667		4.66667	6.66667		5	7.33333		9.66667	8.33333		9.33333	7.33333		4.41993	4.02986	3.70774	3.45393	3.25634	3.13571	3.01841	6.55564	5.16297	4.16808	3.41808	3.04218	2.75835	2.57609		0.862068	1.74059		0.631833	1.67771		1.63144	2.11016
	0	0		19.6667	14.3333		5	9.66667	9.33333	7.33333	8.33333	7.33333		16	7		16.6667	9.66667		17	14.3333		19.6667	13		2.6358	2.23261	1.94085	1.72661	1.61906	1.55454	1.50191	4.0353	3.06461	2.41243	1.97679	1.8077	1.73411	1.67702		3.04687	1.41239		4.21353	2.02171		4.25402	2.58416
	0	0		27	6.66667		16.6667	17	19.6667	9.66667	14.3333	13		7.66667	8.33333		14.6667	6.66667		26.6667	5.66667		21	6		6.80167	5.83068	5.07485	4.58014	4.35048	4.19481	4.09604	5.06526	4.29348	3.53653	2.81876	2.38296	2.15908	1.97801		1.48973	1.30268		2.5964	1.11882		5.62322	0.962218
	0	0		11.3333	13		14.6667	26.6667	21	6.66667	5.66667	6		12.3333	16.6667		11.3333	12.6667		8.33333	9.33333		5.33333	9		8.30162	7.28002	6.40727	5.69559	5.2742	5.06342	4.87738	2.61609	1.94782	1.50196	1.18195	1.02472	0.946231	0.868182		2.56868	2.75479		2.52171	2.40774		0.839773	1.71963
	0	0		9.33333	5		11.3333	8.33333	5.33333	12.6667	9.33333	9		2.33333	4.33333		9.33333	3.66667		4.66667	4.33333		2	5		3.39194	2.92507	2.51991	2.21815	2.06095	1.9652	1.8734	4.3612	3.48341	2.86993	2.41466	2.23059	2.14044	2.0733		0.471314	0.71647		1.33748	0.626988		0.862749	0.754122
	0	0		9	13.6667		9.33333	4.66667	2	3.66667	4.33333	5		4.66667	9		8.66667	9.66667		9	10.6667		8.33333	10.6667		1.96588	1.58477	1.329	1.10577	1.00571	0.929619	0.892137	1.86995	1.43996	1.14104	0.878852	0.753321	0.686937	0.625473		0.717152	1.51077		1.16503	1.9939		1.9592	2.13184
	0	0		9.33333	5.33333		8.66667	9	8.33333	9.66667	10.6667	10.6667		2	3.66667		4.33333	5.33333		9.33333	3.33333		4.66667	4.66667		2.82038	2.34863	2.01622	1.73264	1.60488	1.49708	1.42884	5.46552	4.32829	3.52683	2.95333	2.69067	2.57086	2.48211		0.542992	0.725827		0.734503	1.17243		1.68559	0.627905
	0	0		18.3333	9		4.33333	9.33333	4.66667	5.33333	3.33333	4.66667		2.66667	7.33333		12.6667	7.66667		18.3333	8.66667		17.6667	7.33333		2.58961	2.05932	1.71225	1.43897	1.30921	1.22819	1.15297	2.26444	1.71626	1.32775	1.05928	0.951647	0.878516	0.85543		0.482314	1.65129		2.55033	1.28464		3.33174	1.23728
	0	0		40	4.66667		12.6667	18.3333	17.6667	7.66667	8.66667	7.33333		13.3333	3.33333		22	4.66667		28	3.33333		35.3333	4.66667		5.23976	4.55074	4.04578	3.64759	3.3566	3.19142	3.11182	3.50154	2.52801	1.90698	1.46134	1.27227	1.17611	1.08228		2.39726	0.636341		5.34705	1.0832		4.37706	0.63856
	0	0		11.6667	4.33333		22	28	35.3333	4.66667	3.33333	4.66667		12.3333	5		11.6667	3.66667		11.6667	3.66667		11.3333	4.33333		10.9236	9.22964	8.08727	7.29099	6.94354	6.77103	6.62151	2.20772	1.64542	1.29393	1.05283	0.971274	0.943303	0.90868		1.67498	1.04584		1.92409	0.813047		1.7202	0.687872
	0	0		20.6667	10.3333		11.6667	11.6667	11.3333	3.66667	3.66667	4.33333		17	2.33333		19.3333	3.66667		20.3333	2.33333		20.3333	10.3333		3.39601	2.87599	2.48757	2.12541	1.91417	1.80982	1.64141	2.30722	1.65595	1.24835	0.952722	0.810487	0.742559	0.692391		3.02854	0.607683		3.95524	0.607049		3.78281	0.465277
	0	0		8.33333	7		19.3333	20.3333	20.3333	3.66667	2.33333	10.3333		9.33333	4		8	5.66667		8.33333	6.33333		7.66667	6.33333		7.26007	5.9469	5.02674	4.23561	3.90539	3.70018	3.54646	1.76605	1.30344	0.980997	0.747364	0.654465	0.591248	0.512		1.8929	0.853708		1.65638	1.03425		1.43917	1.02065
	0	0		15.3333	12.6667		8	8.33333	7.66667	5.66667	6.33333	6.33333		6.33333	7.66667		4.33333	11.6667		12	9.66667		15.3333	10.3333		3.77247	3.09479	2.40577	1.82381	1.50928	1.39091	1.21608	3.11853	2.15036	1.5671	1.14531	0.977107	0.886851	0.855693		1.22475	1.42832		0.808127	1.79399		2.34593	1.54753
	0	0		10.3333	5.33333		4.33333	12	15.3333	11.6667	9.66667	10.3333		5	4.33333		5.33333	5.33333		5.66667	4.66667		10.3333	4.33333		3.88613	3.23291	2.77324	2.39064	2.20798	2.14568	2.08481	4.57128	3.40003	2.65776	2.12539	1.93428	1.81024	1.73343		0.863438	0.967052		1.01332	1.02487		1.15766	0.994052
	0	0		5	5		5.33333	5.66667	10.3333	5.33333	4.66667	4.33333		6	4.33333		5	4.33333		5	5		4.66667	4.66667		2.5444	2.0607	1.69533	1.42734	1.32249	1.21938	1.15236	2.81877	2.03141	1.50539	1.15182	0.983696	0.934054	0.872692		1.09243	0.962092		0.919841	0.911773		0.973827	0.965592
	0	0		7	5.33333		5	5	4.66667	4.33333	5	4.66667		7	5.33333		4	4.33333		7	4.33333		7	5.33333		2.24487	1.70079	1.3257	1.02695	0.898667	0.79948	0.753752	2.5111	1.82726	1.40832	1.1209	0.982468	0.914823	0.873766		1.62901	1.29701		0.957991	0.88792		1.70396	0.965471
	0	0		22	9.66667		4	7	7	4.33333	4.33333	5.33333		21.3333	7.33333		21	9.66667		22	9		19	8		2.78999	2.16612	1.79127	1.52835	1.4106	1.35781	1.27514	2.39644	1.79749	1.38104	1.053	0.911914	0.841333	0.77974		2.66897	1.41101		3.61082	1.6517		3.39665	1.78094
	0	0		23.3333	4.66667		21	22	19	9.66667	9	8		17.3333	5.66667		21.6667	4.33333		19.3333	4.66667		20	3.33333		5.2844	4.6698	4.23572	3.83384	3.58981	3.36625	3.18686	3.96473	3.03897	2.42097	1.93162	1.69839	1.56826	1.48846		3.27289	1.36704		3.67514	0.953039		3.56466	0.657253
	0	0		16	13.3333		21.6667	19.3333	20	4.33333	4.66667	3.33333		14	9.33333		14.6667	10.3333		10.3333	12.3333		16	13.3333		7.38678	5.89879	4.9423	4.23041	3.90206	3.74393	3.62528	1.83491	1.36984	1.07016	0.874175	0.784029	0.734705	0.70843		2.73414	1.62845		3.35428	1.76372		2.0204	2.16519
	0	0		13.6667	6.33333		14.6667	10.3333	16	10.3333	12.3333	13.3333		8.33333	3.33333		13.3333	6.33333		13	2.66667		12	4.33333		4.7041	4.02227	3.62995	3.2675	3.12286	3.01231	2.90897	4.87069	3.77449	2.99285	2.41568	2.12688	2.03673	1.89875		1.78662	0.631729		2.57472	1.36752		2.45426	0.429882
	0	0		12.6667	7.33333		13.3333	13	12	6.33333	2.66667	4.33333		12.6667	10.3333		12.6667	6.66667		12	7		10.6667	5.66667		6.90305	5.0886	3.79872	2.84559	2.53474	2.23265	2.11213	2.44309	1.85849	1.49843	1.27295	1.1798	1.14708	1.10884		2.09874	1.83262		2.18686	1.31172		2.50702	1.35583
	0	0		8	10		12.6667	12	10.6667	6.66667	7	5.66667		2.66667	3.66667		8	10		3.33333	7.66667		3.66667	6.33333		6.83443	4.88756	3.5608	2.67721	2.28622	2.13075	1.96819	3.35733	2.54726	1.97893	1.59264	1.43856	1.36885	1.32201		0.413831	0.786912		1.54421	2.31522		0.570394	1.47009
	0	0		7.5	12.6667		8	3.33333	3.66667	10	7.66667	6.33333		3	8.33333		4.66667	8.66667		7.5	9.66667		4.66667	12.6667		2.00325	1.59994	1.34043	1.1686	1.05939	1.03203	1.01421	3.90724	3.01943	2.43846	2.04231	1.84585	1.78837	1.72085		0.461046	1.55829		0.871988	1.79028		1.20315	1.82813
	0	0		5.66667	25.3333		4.66667	7.5	4.66667	8.66667	9.66667	12.6667		4	19.6667		5.66667	16.3333		4	21		4.66667	24.6667		2.44996	1.86016	1.46529	1.18167	1.04954	0.935957	0.870232	4.6042	3.63234	2.94449	2.40987	2.17336	2.00467	1.89464		0.568268	3.04278		0.879744	3.53996		0.809785	3.65188
	0	0		8.33333	5.66667		5.66667	4	4.66667	16.3333	21	24.6667		5	6.33333		4.33333	4.66667		6	5.66667		8.33333	4		1.63301	1.28068	1.06681	0.878754	0.790016	0.745226	0.710593	7.99777	6.59265	5.40005	4.27312	3.67522	3.31414	3.14398		0.898134	1.29638		0.855019	0.861747		1.04002	1.16233
	0	0.666667		7	14.3333		4.33333	6	8.33333	4.66667	5.66667	4		5	9		6	12		7	11.6667		6	13.6667		2.15324	1.73034	1.43791	1.21909	1.11566	1.02904	0.968612	2.46948	1.8483	1.42274	1.1349	1.00176	0.932719	0.857298		0.76749	1.69526		1.18926	1.78378		1.1965	1.90731
	0	0		6	5		6	7	6	12	11.6667	13.6667		0.666667	3		2	4		4.66667	5		6	3.66667		2.71552	2.17023	1.73084	1.38328	1.19889	1.08962	0.988873	5.17192	3.93974	3.02783	2.35969	2.07639	1.90425	1.77669		0.158695	0.575464		0.431178	0.788302		0.69758	0.78197
	0	0		9	9.5		2	4.66667	6	4	5	3.66667		2.33333	6.66667		9	9.5		1.66667	8.33333		2	8		1.81713	1.40588	1.13113	0.922839	0.831359	0.778082	0.747135	2.05004	1.53205	1.17982	0.915053	0.780836	0.724435	0.681679		0.268832	1.30273		2.08211	1.28933		0.269854	1.45477
	0	0		6.33333	12.3333		9	1.66667	2	9.5	8.33333	8		3	6		6	7.33333		6.33333	11.3333		6	11.3333		2.18557	1.86497	1.66009	1.53117	1.46118	1.4378	1.40368	3.57627	2.74732	2.08252	1.63316	1.41799	1.28476	1.16722		0.664526	0.9509		0.996283	1.4913		1.06458	1.56081
	0	0		21.3333	5.66667		6	6.33333	6	7.33333	11.3333	11.3333		4.66667	5.33333		21.3333	5.66667		18.3333	5.33333		17.6667	5.33333		2.24646	1.73206	1.39653	1.14848	1.01773	0.937521	0.868524	4.23792	3.30545	2.71992	2.32062	2.15614	2.05933	1.99337		0.572966	0.940866		4.15686	1.18585		3.74481	1.13706
	0	0		5	11.3333		21.3333	18.3333	17.6667	5.66667	5.33333	5.33333		2.33333	7.66667		4.66667	11.3333		5	9.33333		5	9.66667		6.70171	5.65233	4.97375	4.45219	4.22529	3.98097	3.83595	2.38701	1.86664	1.53816	1.33637	1.23963	1.19311	1.13977		0.466539	1.94091		0.56873	2.52185		0.851563	1.72465
	0.333333	0		12.3333	24.3333		4.66667	5	5	11.3333	9.33333	9.66667		9.33333	7		11.6667	24.3333		9.66667	14.6667		9.66667	16		1.98376	1.47905	1.15972	0.934464	0.845211	0.789066	0.745138	3.22637	2.71438	2.40563	2.19614	2.12598	2.07371	2.02678		1.41494	1.33297		1.87725	3.02232		1.81555	2.20315
	0	0		13.6667	25		11.6667	9.66667	9.66667	24.3333	14.6667	16		10	20		12	21.3333		13.6667	21.3333		10.3333	25		4.64948	3.49114	2.65711	2.09877	1.75771	1.58554	1.43602	5.37803	4.46016	3.76799	3.1329	2.7961	2.49874	2.31654		1.94759	3.26673		2.53401	3.51293		2.67709	2.9508
	0	0		4.33333	7.33333		12	13.6667	10.3333	21.3333	21.3333	25		3.33333	6		3.33333	5		4.33333	7.33333		4	7		4.98075	4.01525	3.34308	2.74348	2.46842	2.18219	2.07562	7.48154	5.81553	4.65707	3.70067	3.29373	3.04333	2.93825		0.60667	1.17235		0.579675	1.08331		0.752818	1.30737
	0	0		9.66667	4		3.33333	4.33333	4	5	7.33333	7		7.33333	2.66667		9.66667	4		7.33333	3		8	3.33333		1.67529	1.23692	0.974429	0.78383	0.685667	0.610619	0.571513	1.98708	1.73169	1.58321	1.4449	1.33903	1.24559	1.18963		1.6616	0.55783		1.90605	0.813039		1.52857	0.593247
	0	0		7.66667	20.6667		9.66667	7.33333	8	4	3	3.33333		4.33333	14.6667		5.33333	16.3333		7.66667	16.3333		6	16.6667		3.01054	2.48807	2.14766	1.87999	1.75093	1.69906	1.62386	1.78856	1.33629	1.01005	0.800905	0.711298	0.645262	0.613729		0.67624	2.33529		0.871844	3.58448		0.888244	3.62719
	0	0		5.66667	19		5.33333	7.66667	6	16.3333	16.3333	16.6667		4.33333	18.6667		5.33333	16.6667		5.66667	19		5.66667	9		1.86989	1.49479	1.19634	0.948565	0.869824	0.726152	0.699748	7.15679	5.80447	4.7925	4.10534	3.84269	3.70201	3.52271		0.963224	2.98736		0.870854	2.34194		1.11301	3.81053
	0	0.666667		17.6667	22		5.33333	5.66667	5.66667	16.6667	19	9		10	13		17.6667	21.3333		16.6667	15.3333		11.6667	15.3333		2.58952	1.98293	1.56158	1.25001	1.1216	1.01969	0.977109	4.70268	4.1053	3.64052	3.17416	2.99091	2.84431	2.71754		1.789	2.30099		3.18611	4.06604		3.52745	2.58839
	0	0		22.6667	8.66667		17.6667	16.6667	11.6667	21.3333	15.3333	15.3333		8	2.33333		19.3333	8.66667		21.3333	5		19.6667	6.66667		5.49839	4.64483	4.13177	3.70384	3.5267	3.4008	3.30721	6.91077	5.5781	4.53047	3.72201	3.32766	2.9207	2.74476		1.67143	0.407369		3.98758	1.37903		3.84268	0.799814
	0	0		9.33333	4		19.3333	21.3333	19.6667	8.66667	5	6.66667		3.66667	7.5		9.33333	4		8.33333	3.33333		6	3.66667		6.47297	5.54421	4.93342	4.42347	4.11494	3.89181	3.7482	2.27616	1.9201	1.62652	1.34484	1.17386	1.08063	0.969727		0.641165	1.49278		2.16888	0.492899		1.47417	0.642936
	0	0		14	7.66667		9.33333	8.33333	6	4	3.33333	3.66667		1	4.66667		7.33333	6.66667		13.6667	5.66667		14	7.66667		3.13121	2.56091	2.14245	1.81757	1.68755	1.6053	1.54069	1.63966	1.24663	0.978244	0.772538	0.694077	0.643957	0.598072		0.183609	1.19632		1.18861	1.43797		2.66548	1.09598
	0	0.333333		11.3333	21		7.33333	13.6667	14	6.66667	5.66667	7.66667		11	21		11.3333	17.3333		7.33333	18.3333		5.66667	20.3333		3.91702	3.40419	2.99115	2.65766	2.4515	2.33896	2.2051	2.96625	2.32427	1.88117	1.57176	1.44657	1.34082	1.30275		1.63196	2.85906		1.56513	3.10462		1.38719	2.68523
	0	0		14.6667	15.6667		11.3333	7.33333	5.66667	17.3333	18.3333	20.3333		9	6.66667		12.3333	9.33333		14.6667	6.66667		14.3333	15.6667		3.86112	2.92006	2.17625	1.5985	1.34715	1.2028	1.0945	7.40886	5.83922	4.54008	3.46788	2.8244	2.59498	2.22531		1.89176	0.900197		2.64787	1.26404		2.72151	1.11571
	0	0		11.6667	10		12.3333	14.6667	14.3333	9.33333	6.66667	15.6667		4.33333	6.33333		10.3333	9.66667		11.3333	10		11	9		5.09717	4.22022	3.62482	3.11923	2.96249	2.77281	2.67673	2.29062	1.9121	1.64741	1.41816	1.251	1.17016	1.02282		0.742096	1.4916		1.9448	1.8622		2.20444	1.93081
	0	0		8.66667	24.6667		10.3333	11.3333	11	9.66667	10	9		6.66667	19		7	24.6667		8.66667	22		8.33333	18.6667		4.67791	3.73888	3.01549	2.49578	2.27009	2.07959	1.98034	4.03973	3.17484	2.57681	2.13377	1.916	1.82858	1.68374		1.57232	2.84113		1.54815	3.8419		1.49167	3.87812
	0	0		14.3333	17.6667		7	8.66667	8.33333	24.6667	22	18.6667		0.666667	13		9.66667	11.3333		4	15.6667		14.3333	17.6667		2.90265	2.41916	2.08385	1.80685	1.65977	1.5926	1.48388	8.19211	6.69445	5.38825	4.25846	3.68734	3.26099	2.93553		0.136759	2.52762		1.04557	1.46409		0.531945	2.13112
	0	0		7.33333	6		9.66667	4	14.3333	11.3333	15.6667	17.6667		5.33333	1.66667		5	3.33333		7.33333	6		5.33333	3.66667		2.68478	2.35437	2.12919	1.96737	1.92378	1.84703	1.8209	4.27639	3.68629	3.19311	2.67299	2.42703	2.26708	2.18488		1.37119	0.431652		0.831132	0.757456		1.15338	0.902238
	0	0		10	6.66667		5	7.33333	5.33333	3.33333	6	3.66667		7.33333	6.33333		10	6.66667		9.33333	6		6.66667	4.66667		2.14129	1.70221	1.42577	1.23595	1.12574	1.07186	1.01615	2.00364	1.48105	1.14346	0.924784	0.798386	0.746479	0.724747		1.79803	1.24269		1.66349	1.266		1.2574	1.02372
	0	0		7.33333	15.3333		10	9.33333	6.66667	6.66667	6	4.66667		2.66667	9.66667		7.33333	8.66667		4	13		6	12.6667		2.79785	2.25202	1.88487	1.60451	1.47926	1.38768	1.3403	2.49566	1.94441	1.56043	1.27937	1.17346	1.09695	1.06163		0.464435	1.73989		1.34143	1.7096		0.73963	1.91123
	0	0.333333		5.66667	14.6667		7.33333	4	6	8.66667	13	12.6667		4.66667	8.66667		5.66667	10		5	14.3333		5.66667	12		2.20006	1.75163	1.4538	1.21237	1.08518	1.02917	0.976851	5.89361	4.50344	3.36584	2.68158	2.418	2.29477	2.2372		0.666173	1.87922		1.04028	1.88362		0.995499	2.34054
	0.333333	0		22	13		5.66667	5	5.66667	10	14.3333	12		17.3333	3		20	12.6667		20	13		19.6667	12.6667		2.23524	1.75018	1.40081	1.11943	1.0003	0.945317	0.905548	5.42295	4.25028	3.38947	2.69767	2.35969	2.17463	2.00213		3.82155	0.520044		4.17043	2.61085		3.60894	3.11513
	0	0		8	6.33333		20	20	19.6667	12.6667	13	12.6667		2	4.66667		7	6.33333		4.33333	5.33333		8	5.33333		6.99903	5.87124	5.02884	4.31371	3.91614	3.62438	3.40279	4.44206	3.89301	3.50243	3.17775	2.95242	2.80488	2.62017		0.267613	0.799026		1.38583	1.04688		0.658262	1.06028
	0	0		14.6667	4		7	4.33333	8	6.33333	5.33333	5.33333		11.3333	2.66667		12.6667	3.66667		14.6667	4		9.33333	4		1.81035	1.48578	1.27521	1.12138	1.05401	1.01546	1.01153	1.81164	1.58712	1.37715	1.16406	1.00747	0.917793	0.838308		2.02617	0.567656		2.3527	0.710169		2.36985	0.795728
	0	0		8	18.6667		12.6667	14.6667	9.33333	3.66667	4	4		6	19.3333		7	18.3333		8	18.3333		6.66667	16.6667		4.20189	3.48165	2.96492	2.52728	2.25284	2.07097	1.94381	2.12982	1.55189	1.16099	0.866306	0.763373	0.681768	0.647865		1.18532	4.16526		1.36797	3.71778		1.27954	3.23843
	0	0		8	10.6667		7	8	6.66667	18.3333	18.3333	16.6667		4.66667	5		8	3.33333		6.66667	7.66667		8	10.6667		2.55552	2.12418	1.81487	1.55684	1.43806	1.36108	1.30723	7.58685	6.09055	4.87801	3.79367	3.25782	2.91925	2.63842		1.08797	0.748617		1.5744	0.442305		1.25218	1.64564
	0	0		7	6.33333		8	6.66667	8	3.33333	7.66667	10.6667		1	4.66667		7	4.33333		6	5.66667		6.66667	6.33333		3.17518	2.48248	2.01172	1.64343	1.45077	1.33967	1.27537	2.61913	2.21616	1.91742	1.67392	1.50962	1.45558	1.40509		0.205579	0.982946		0.809113	0.543149		1.17078	1.14108
	0	0		21	4		7	6	6.66667	4.33333	5.66667	6.33333		3	3.33333		17.6667	3.66667		18	4		21	4		2.1613	1.76801	1.4457	1.16218	1.07235	0.954553	0.926327	2.26241	1.78257	1.4719	1.24617	1.16322	1.10379	1.05282		0.634942	0.604065		4.06641	0.74607		3.59866	0.728909
	0	0		4	4		17.6667	18	21	3.66667	4	4		5.66667	2.33333		2.33333	4		4	4		4	4		5.12645	4.53847	4.13586	3.87805	3.78675	3.7405	3.64902	2.12404	1.54899	1.16424	0.887097	0.765096	0.681737	0.62543		1.09096	0.303013		0.361821	0.645159		0.875849	0.849169
	0	0		6	16.6667		2.33333	4	4	4	4	4		9	10.6667		5	16		3.33333	16		6	16.3333		1.75271	1.35669	1.0845	0.878749	0.810996	0.745807	0.715334	1.93066	1.45937	1.13965	0.90294	0.815229	0.736923	0.703554		1.09695	2.06983		0.793552	2.73396		0.567204	2.55894
	0	0		6	9.66667		5	3.33333	6	16	16	16.3333		1.66667	7.66667		6	7		4.33333	9.33333		4.66667	9.66667		1.80665	1.39629	1.09543	0.863985	0.739092	0.633524	0.61231	6.05837	4.84903	3.83813	3.00283	2.55347	2.23891	1.99313		0.309787	1.37809		1.17041	1.6361		0.922605	1.8159
	0	0		4	4		6	4.33333	4.66667	7	9.33333	9.66667		7	2.66667		3.33333	4		4	4		4	2.66667		2.05079	1.62582	1.33702	1.13337	1.02682	0.980747	0.899583	4.07984	3.17508	2.48899	2.00388	1.84975	1.72344	1.62755		1.32781	0.597222		0.636658	0.601396		0.930865	0.822705
	0	0		22.6667	19		3.33333	4	4	4	4	2.66667		11.3333	12.6667		16.3333	18.3333		22.3333	17		20.6667	14		1.81886	1.37658	1.08454	0.888383	0.797229	0.726142	0.683115	1.69789	1.26385	0.963871	0.749436	0.677344	0.627665	0.586183		2.21657	2.12542		3.01637	3.18403		4.17691	2.75863
	5.5	0		24.6667	6.33333		16.3333	22.3333	20.6667	18.3333	17	14		11.6667	3.33333		19.1667	5.33333		18.3333	4.66667		14	6.33333		6.41154	5.31842	4.58821	3.94031	3.6265	3.46452	3.25001	7.08474	5.53811	4.38628	3.36943	2.79868	2.49368	2.32048		2.31732	0.916054		2.73375	1.02326		3.03531	0.965187
	0	0		13	6.66667		19.1667	18.3333	14	5.33333	4.66667	6.33333		8.33333	5		9.66667	6		13	6.66667		11	6.66667		7.1739	5.26644	4.05691	3.15104	2.79184	2.54222	2.47659	2.06616	1.60038	1.33243	1.12074	1.02616	0.981837	0.923288		1.65192	0.98688		1.94551	1.23968		2.43069	1.09178
	0	0		16.6667	6.33333		9.66667	13	11	6	6.66667	6.66667		12	5		14	6.33333		16.6667	4.66667		15.3333	5		4.32142	3.46104	2.84008	2.44793	2.22259	2.1117	1.97085	2.9226	2.27685	1.77292	1.41297	1.21884	1.13619	1.03458		2.10864	0.816985		2.45979	0.893475		2.49251	0.736315
	0	0.666667		6.33333	11.3333		14	16.6667	15.3333	6.33333	4.66667	5		11.6667	9.33333		5.66667	10.3333		6	9.66667		6.33333	9		4.45606	3.74786	3.19155	2.75972	2.48435	2.281	2.10662	1.87042	1.434	1.13717	0.915322	0.830105	0.770794	0.739398		1.60649	1.38287		1.05381	1.91765		1.20027	1.70762
	0	0		16	4.66667		5.66667	6	6.33333	10.3333	9.66667	9		9.66667	4.66667		11	4.66667		16	4		12.3333	3.33333		2.30719	1.89825	1.51411	1.23024	1.07525	1.02331	0.910867	4.40305	3.35706	2.64597	2.17448	1.93936	1.83522	1.76061		1.75067	1.01042		2.13584	0.980072		2.74731	0.715836
	0	0		7.66667	15.3333		11	16	12.3333	4.66667	4	3.33333		5	7		4.66667	12.3333		4.66667	15		7.66667	15.3333		5.13063	4.18863	3.51108	3.00939	2.79932	2.60143	2.4521	1.99332	1.51256	1.1915	0.943477	0.840194	0.788832	0.742601		1.04613	1.38593		0.932979	2.07121		1.06399	2.851
	0	0		9.66667	17.3333		4.66667	4.66667	7.66667	12.3333	15	15.3333		6.33333	10.3333		6.66667	17.3333		9.33333	14.6667		9.66667	10.3333		2.74018	2.13331	1.73924	1.47661	1.35551	1.30121	1.25208	4.52335	3.86893	3.35322	2.87602	2.64569	2.48207	2.34553		1.28904	1.78091		0.927102	2.91415		1.79294	1.79508
	0.333333	0		20	20.6667		6.66667	9.33333	9.66667	17.3333	14.6667	10.3333		17.3333	1.66667		19.6667	13.6667		17.3333	20.6667		19	19		2.62474	2.22728	1.95941	1.72722	1.63846	1.54505	1.49614	4.55222	3.87804	3.17191	2.57404	2.20956	1.97761	1.86079		3.91855	0.29395		4.20498	3.42023		3.88981	4.58984
	0	0		9	6.33333		19.6667	17.3333	19	13.6667	20.6667	19		6.66667	6		8.33333	6.33333		9	6		7.33333	5.33333		7.40887	6.2434	5.23432	4.37338	3.87782	3.55988	3.2493	6.78629	6.08704	5.65226	5.38972	5.23689	5.16788	5.1119		1.41553	1.00296		1.76855	1.11593		1.8067	0.899006
	0	0		6.33333	13		8.33333	9	7.33333	6.33333	6	5.33333		3	6.33333		3.33333	9.66667		6.33333	13		4.33333	8		3.19173	2.59269	2.17337	1.88391	1.70929	1.59119	1.51593	2.13404	1.70355	1.3701	1.10462	0.958037	0.89036	0.780781		0.69857	1.0056		0.756549	1.92758		1.19673	3.21899
	0	0		10.3333	15		3.33333	6.33333	4.33333	9.66667	13	8		6.33333	7.66667		6	14.3333		10	15		10.3333	12.6667		2.04977	1.59078	1.29562	1.09346	0.970818	0.929508	0.879671	3.45352	3.08419	2.81101	2.57433	2.46835	2.37022	2.32757		1.3078	2.08293		1.02085	3.41071		2.4092	3.56491
	0	0		17.3333	10.6667		6	10	10.3333	14.3333	15	12.6667		15.3333	3		17	7.33333		17.3333	8.33333		14.6667	10.6667		3.58751	2.98252	2.59006	2.33027	2.20311	2.14305	2.06449	4.45701	3.98813	3.68389	3.43432	3.33535	3.23148	3.18718		2.27974	0.624945		2.90108	1.1468		3.14455	1.46369
	0	0		11.6667	6.33333		17	17.3333	14.6667	7.33333	8.33333	10.6667		7.66667	1.66667		10.6667	4		10.6667	6.33333		10.3333	4.33333		6.09156	4.97168	4.0407	3.32797	2.95138	2.71208	2.5361	2.81211	2.37008	2.0103	1.67881	1.49749	1.43337	1.31872		1.44012	0.344301		2.054	0.408277		2.29651	1.28435
	0	0		9.5	11.6667		10.6667	10.6667	10.3333	4	6.33333	4.33333		1	4		2.66667	4		9.5	6.33333		9	11.6667		5.00682	3.7106	2.8657	2.3217	2.12087	2.03118	1.9621	1.83614	1.47739	1.24617	1.01702	0.903121	0.831286	0.819434		0.24753	0.644275		0.322486	0.718882		1.29037	1.25906
	0	0		4.33333	8.66667		2.66667	9.5	9	4	6.33333	11.6667		5.66667	4.33333		3.33333	8.66667		3.66667	6.66667		4.33333	8.33333		3.17804	2.64291	2.34958	2.17013	2.09467	2.04952	2.01442	3.49732	2.71023	2.16325	1.76737	1.60169	1.50455	1.45004		0.936739	0.79745		0.606768	1.08187		0.643104	0.946438
	0	0		8	8.66667		3.33333	3.66667	4.33333	8.66667	6.66667	8.33333		6	0		6	6		7	7.66667		8	8.66667		1.66462	1.23643	0.927925	0.706721	0.59939	0.544454	0.502807	2.43936	2.00933	1.66735	1.36365	1.2516	1.1525	1.04083		1.10455	0		0.86336	1.18232		1.13501	1.36558
	0	0		10.3333	10.3333		6	7	8	6	7.66667	8.66667		3.66667	7.33333		5.66667	9.66667		9	10.3333		10.3333	9.66667		2.28309	1.80722	1.50153	1.23135	1.08015	0.985062	0.911237	2.78155	2.18875	1.77856	1.52687	1.40003	1.35454	1.31445		0.555152	1.50218		1.06609	1.77735		1.67669	2.14548
	0	0		13.3333	14.3333		5.66667	9	10.3333	9.66667	10.3333	9.66667		6.66667	14.6667		10.3333	14.3333		6	9		13.3333	11.6667		3.01693	2.43631	1.99538	1.69537	1.57469	1.42371	1.38653	3.87132	3.08093	2.48297	2.08983	1.8755	1.75432	1.71117		1.1528	2.57694		1.74804	2.66005		0.936947	1.78614
	0	0		17.6667	26.6667		10.3333	6	13.3333	14.3333	9	11.6667		10.6667	2.66667		8	16.3333		17	18		17.6667	26.6667		3.92737	3.28761	2.89165	2.59805	2.48595	2.42869	2.40234	4.43216	3.63555	3.0427	2.63173	2.42845	2.31723	2.20056		2.03505	0.534144		1.51334	2.93616		3.03917	4.16843
	0	0		29	15		8	17	17.6667	16.3333	18	26.6667		13.3333	5.66667		21.3333	7.33333		29	10.6667		27.6667	15		5.83415	4.9151	4.06107	3.29704	2.97978	2.82317	2.63227	6.53515	5.7152	5.14509	4.72847	4.55795	4.48298	4.44348		2.33654	1.12561		3.52238	1.3726		4.96182	2.1855
	0	0		18	14		21.3333	29	27.6667	7.33333	10.6667	15		10.3333	7.33333		15.3333	10.3333		18	14		16.3333	11.3333		7.39722	6.534	5.87635	5.23068	4.91388	4.6555	4.46459	3.91584	3.35896	3.01414	2.75859	2.65742	2.61451	2.58521		1.97495	0.933821		2.2092	1.00598		1.75088	1.74314
	0	0		11.3333	6		15.3333	18	16.3333	10.3333	14	11.3333		1.66667	1.66667		4.66667	6		11.3333	5.66667		6	5.33333		4.32902	3.74559	3.28799	2.90389	2.70855	2.50478	2.4775	3.28295	2.64773	2.04484	1.62123	1.42399	1.31215	1.18747		0.392706	0.31736		0.501321	1.15933		1.88511	0.941104
	0	0		13.3333	7.66667		4.66667	11.3333	6	6	5.66667	5.33333		12	3.33333		13.3333	7.66667		7	5		8.66667	6.66667		2.12418	1.86852	1.61009	1.42601	1.31557	1.23717	1.21417	2.72279	1.99758	1.50486	1.19801	1.06334	0.987792	0.928654		2.23158	0.61453		2.61776	1.49567		0.979273	0.924213
	0	0		10.3333	13.3333		13.3333	7	8.66667	7.66667	5	6.66667		7	14.3333		9.66667	10.3333		9.66667	10		10	13.3333		3.7378	3.13794	2.65089	2.21454	2.04665	1.82697	1.70437	2.96166	2.35693	1.8551	1.50029	1.29537	1.21358	1.15109		1.13865	2.5843		1.7881	1.86749		1.97468	1.5341
	0	0		18.3333	8.33333		9.66667	9.66667	10	10.3333	10	13.3333		19	5.66667		18	3.33333		12	6.66667		13.3333	8.33333		4.11125	3.24707	2.61176	2.23945	2.07772	1.96116	1.89956	4.8833	3.70592	2.78508	2.11319	1.73806	1.61299	1.45563		3.77428	0.993739		2.95097	0.492389		1.92442	1.25119
	0	0		20.6667	6.33333		18	12	13.3333	3.33333	6.66667	8.33333		11.6667	5		19	6.33333		20.3333	5		20.6667	5.66667		8.42837	6.06002	4.27126	3.06657	2.54067	2.33396	2.14415	2.69418	2.16308	1.72787	1.38266	1.17664	1.11387	1.04651		2.01366	1.03645		3.25571	1.16339		3.15417	0.996615
	0	0		34	23		19	20.3333	20.6667	6.33333	5	5.66667		13	3		12.3333	22.6667		33.3333	14.6667		30	23		4.83706	4.35741	4.01217	3.69744	3.50768	3.32839	3.20002	2.98696	2.23901	1.70072	1.33597	1.1815	1.10547	1.04239		3.10465	0.426683		2.47342	4.02578		5.56013	3.26305
	0	0		14.3333	8.33333		12.3333	33.3333	30	22.6667	14.6667	23		12	9.33333		11.3333	7.5		14.3333	8.33333		13	3		9.80383	9.04894	8.47847	7.97735	7.66743	7.54131	7.47232	4.7617	4.40661	4.13146	3.84742	3.74391	3.68373	3.46183		2.20027	2.07133		2.57539	1.19153		2.68527	1.59923
	0	0		6.33333	10.6667		11.3333	14.3333	13	7.5	8.33333	3		7.66667	10.6667		5	7.33333		6.33333	6.66667		4.33333	10.6667		4.59718	3.88398	3.34836	2.92396	2.61331	2.50494	2.40474	2.50782	1.99317	1.64631	1.39137	1.30605	1.25042	1.23125		1.77207	2.7603		0.792494	1.44663		1.17723	1.45694
	0	0		24	17		5	6.33333	4.33333	7.33333	6.66667	10.6667		13.3333	16.3333		24	17		20	13.3333		13.3333	14.3333		1.82013	1.4677	1.20804	1.02034	0.923761	0.872645	0.832478	3.35913	2.65764	2.1777	1.82221	1.66501	1.56853	1.47272		2.17798	3.30192		4.19612	3.63447		2.48743	2.33074
	3	0		35.6667	9.66667		24	20	13.3333	17	13.3333	14.3333		15.3333	14.3333		30.3333	7.66667		28.6667	7.66667		30.3333	9.66667		4.87339	4.50235	4.09429	3.52714	3.17302	2.83795	2.74143	4.85248	4.08223	3.62293	3.27023	3.09477	2.98408	2.88207		2.92842	2.78362		6.18763	1.505		6.12793	1.56671
	0	0.333333		19.6667	21.6667		30.3333	28.6667	30.3333	7.66667	7.66667	9.66667		14.3333	15.3333		19.3333	21.3333		15	19		19.6667	17.3333		9.69588	8.58415	7.70878	6.79995	6.20792	5.81266	5.45958	3.38227	2.7504	2.29128	1.93422	1.81671	1.73238	1.67597		3.45774	2.23833		3.20349	3.34162		3.22315	3.02061
	0	0.333333		11.3333	12.6667		19.3333	15	19.6667	21.3333	19	17.3333		8.33333	10.6667		9.66667	11		10.3333	10.6667		11.3333	11.6667		5.4526	4.74795	4.16469	3.60923	3.3223	3.15699	3.02851	6.69518	5.57415	4.64071	3.89654	3.54305	3.26092	3.16539		1.15501	1.8142		1.58263	1.97068		1.69788	1.8741
	0	0		22	15.3333		9.66667	10.3333	11.3333	11	10.6667	11.6667		7.33333	25.6667		18	14.6667		22	15.3333		18.6667	12.3333		3.03929	2.53925	2.13314	1.8159	1.64893	1.59594	1.46933	4.63878	3.62676	2.86867	2.28454	1.98365	1.77186	1.68152		1.23722	5.82629		3.98249	2.44953		4.38013	2.30133
	1.33333	0		26.3333	10.3333		18	22	18.6667	14.6667	15.3333	12.3333		18	8.66667		24	10.3333		23.6667	8		23.6667	9		6.0877	5.45729	4.97501	4.52228	4.29687	4.17979	4.06439	4.29047	3.61376	3.11134	2.7232	2.534	2.3955	2.30807		3.58154	1.5573		3.68055	2.07959		4.01824	1.50855
	0	0		7.66667	9.33333		24	23.6667	23.6667	10.3333	8	9		6.33333	4.66667		5.66667	5.33333		7.66667	8.33333		6.33333	8.66667		7.65347	6.45842	5.41394	4.58178	3.88336	3.76684	3.49355	3.74161	2.93126	2.38124	1.96257	1.79237	1.63711	1.58216		1.29199	0.869024		0.883469	1.14856		1.29307	1.47867
	0	0		8.66667	8.33333		5.66667	7.66667	6.33333	5.33333	8.33333	8.66667		10.3333	1.33333		5	8.33333		8.66667	7		6.66667	7.33333		2.70738	2.16106	1.62354	1.23694	1.08352	0.962317	0.875813	3.55437	2.78458	2.26278	1.97117	1.8404	1.7672	1.69745		2.69658	0.28785		0.637057	1.5348		1.43563	1.10231
	0	0		28	5.66667		5	8.66667	6.66667	8.33333	7	7.33333		11.3333	3.66667		25.6667	5.66667		23	5.66667		23	3		1.86455	1.51182	1.29965	1.11617	1.00145	0.973406	0.949197	3.01602	2.28835	1.80808	1.46941	1.30919	1.25494	1.16844		2.06627	0.820141		5.06341	1.18102		4.50098	1.30299
	0.333333	2.66667		39.6667	32		25.6667	23	23	5.66667	5.66667	3		5.66667	8.33333		38.6667	15		34	25		33.6667	19		8.24778	7.36344	6.65548	6.0687	5.69148	5.4961	5.17779	2.61388	2.04677	1.6932	1.47619	1.38458	1.34386	1.29462		0.955788	1.42576		7.07448	2.94824		7.05994	3.6783
	1	0		19	6		38.6667	34	33.6667	15	25	19		10.3333	6.66667		13.6667	6		15.6667	3.66667		17.3333	3.33333		10.5336	9.48628	8.58571	7.51384	6.94942	6.46401	6.19683	7.2577	5.53392	4.52222	3.83883	3.54583	3.40477	3.29925		2.05916	1.5511		2.66086	1.13366		2.62911	0.81068
	0	4.66667		18	24.6667		13.6667	15.6667	17.3333	6	3.66667	3.33333		14.3333	10.3333		17.3333	16.6667		16	16		18	10		6.33143	4.95137	3.99824	3.26644	2.87832	2.67104	2.38688	1.8912	1.46137	1.17315	0.990598	0.912074	0.843288	0.820844		3.66022	2.01837		4.15893	2.54571		3.91152	3.11335
	0	0		34	3.66667		17.3333	16	18	16.6667	16	10		5	2.66667		18.6667	3.33333		25.6667	3.66667		34	3.33333		6.38704	5.54411	4.93164	4.42386	4.08182	3.83408	3.62858	6.85274	5.07506	3.85298	2.9938	2.70147	2.47176	2.38691		0.638173	0.555653		3.63294	0.719792		6.14658	0.551183
	0	0		18	4.66667		18.6667	25.6667	34	3.33333	3.66667	3.33333		17.3333	4.33333		10.6667	4.66667		14.3333	3.33333		18	3.33333		7.95123	7.01596	6.29173	5.73233	5.32604	5.1889	4.84884	1.6279	1.22751	0.981893	0.761979	0.696535	0.6174	0.602281		2.9365	0.754199		1.69971	0.817707		2.40345	0.625424
	0	0		17.6667	7		10.6667	14.3333	18	4.66667	3.33333	3.33333		1.33333	6.66667		8.33333	7		17.6667	4.33333		9.66667	4.33333		3.29736	2.85248	2.51566	2.1853	1.99131	1.86604	1.8581	1.85472	1.38324	1.07244	0.8691	0.767529	0.709318	0.683585		0.255071	1.31176		0.839513	1.21181		2.74189	0.890703
	0	10.3333		14.6667	31.3333		8.33333	17.6667	9.66667	7	4.33333	4.33333		1.33333	18		6	17.6667		14.6667	16.6667		7.33333	17.6667		3.44994	2.90786	2.53153	2.27376	2.15144	2.06957	1.96588	2.33947	1.79658	1.45437	1.2231	1.12226	1.07209	1.03223		0.185071	3.49138		1.06023	2.53325		2.23766	2.6316
	0	0		28.3333	7		6	14.6667	7.33333	17.6667	16.6667	17.6667		17.3333	8		15.3333	7		27.6667	4.66667		28.3333	6		2.83333	2.395	2.06226	1.79676	1.64036	1.57358	1.51136	8.20427	6.02815	4.58508	3.63457	3.15481	2.9491	2.776		4.03452	1.68419		3.05467	1.23341		7.06446	0.663508
	0	0.333333		17.6667	11		15.3333	27.6667	28.3333	7	4.66667	6		12.6667	7.33333		17.6667	10.6667		14.3333	9.33333		15	8		8.59296	7.87297	7.26999	6.73536	6.31565	6.02237	5.96847	2.16227	1.68193	1.35573	1.13287	1.05327	0.984798	0.981857		2.71287	1.21108		3.14204	1.49505		2.91271	1.49989
	0	0		13.6667	6		17.6667	14.3333	15	10.6667	9.33333	8		3.33333	5.66667		4.66667	3.33333		9.33333	6		13.6667	5		5.73734	4.88118	4.07324	3.39025	3.04506	2.87761	2.68611	3.78992	2.80324	2.15024	1.68571	1.49061	1.35522	1.25773		0.580534	0.773047		0.363357	0.578183		1.83986	0.797015
	0	0.666667		6	16.3333		4.66667	9.33333	13.6667	3.33333	6	5		0.333333	13.6667		4	15.6667		6	13.3333		6	14.3333		2.82031	2.47097	2.23639	2.02373	1.94787	1.83351	1.84098	2.12093	1.58906	1.18821	0.870324	0.736358	0.643242	0.608181		0.0569574	2.50931		0.384766	2.66868		0.850624	2.59329
	0	0		6	6.33333		4	6	6	15.6667	13.3333	14.3333		5.33333	7		3	6.33333		6	5.66667		4.33333	3.66667		1.83462	1.42608	1.12049	0.921608	0.808608	0.716963	0.679109	5.46173	4.20703	3.41078	2.80701	2.55837	2.38356	2.2465		0.860995	1.23422		0.344893	1.11572		1.20726	0.964817
	0	0		9	4.33333		3	6	4.33333	6.33333	5.66667	3.66667		7.66667	4.33333		9	4.33333		6.33333	3.66667		7	3.66667		2.12676	1.66498	1.31703	1.0556	0.898527	0.837143	0.816996	2.87954	2.11992	1.59924	1.25416	1.13178	1.04959	1.00071		1.35443	0.853808		1.54181	0.696295		1.05367	0.66918
	0	0		9.66667	9		9	6.33333	7	4.33333	3.66667	3.66667		3.33333	6		9.66667	8.33333		8	8		8	8.66667		2.75221	2.20239	1.79996	1.48173	1.29997	1.21151	1.16372	2.14547	1.54552	1.10919	0.825019	0.67084	0.628075	0.556621		0.793526	1.20624		1.63627	1.34707		1.46444	1.27464
	0	0		17.6667	6.33333		9.66667	8	8	8.33333	8	8.66667		6.66667	7.33333		7.33333	5.33333		10.3333	3.66667		17.6667	6.33333		3.03231	2.54054	2.13283	1.77002	1.5713	1.46689	1.35872	3.44209	2.64921	2.05814	1.60851	1.35347	1.22828	1.14186		1.34236	1.7985		1.21566	1.01151		2.05944	0.535188
	0	0		10	7.33333		7.33333	10.3333	17.6667	5.33333	3.66667	6.33333		17.3333	5		7.33333	7		10	5.33333		8.66667	7.33333		3.34172	2.9381	2.63892	2.37771	2.19418	2.04938	1.89901	2.17883	1.69466	1.37756	1.17347	1.08246	1.01855	0.992401		3.30462	1.03817		1.02624	1.1805		2.02112	1.21853
	0	0		10.3333	4		7.33333	10	8.66667	7	5.33333	7.33333		6	2.33333		10.3333	3		8.66667	4		6.66667	4		2.90322	2.42904	2.06529	1.78495	1.62963	1.55808	1.50182	2.63331	2.09738	1.75295	1.51705	1.42281	1.37138	1.30911		1.08102	0.364434		2.04087	0.555733		1.32732	0.694765
	0	0		11	10.6667		10.3333	8.66667	6.66667	3	4	4		4	6		2.66667	7.33333		11	10.6667		9.66667	9.33333		3.00452	2.48145	2.10634	1.80641	1.61325	1.53861	1.41957	2.06225	1.48235	1.11589	0.82748	0.715381	0.6387	0.59135		0.696671	1.35225		0.34266	1.50766		1.62651	1.85411
	0	0		9	5.66667		2.66667	11	9.66667	7.33333	10.6667	9.33333		1.33333	3		9	4.33333		6	4.66667		7.33333	5.66667		2.2575	1.90437	1.66431	1.48923	1.38372	1.30147	1.21035	3.2503	2.62814	2.21513	1.94506	1.78011	1.74904	1.63346		0.20863	0.652932		0.85228	0.683656		1.03278	0.835055
	0	0		11.6667	10.3333		9	6	7.33333	4.33333	4.66667	5.66667		10.5	3.66667		11.6667	9.66667		10.6667	8.33333		11.6667	10.3333		2.23702	1.72882	1.35158	1.10323	0.975792	0.937197	0.888852	2.41225	1.77986	1.333	1.01316	0.868097	0.781827	0.695365		1.72175	0.433085		1.77855	2.2104		2.19295	1.95326
	0	5.33333		30	26.6667		11.6667	10.6667	11.6667	9.66667	8.33333	10.3333		14	14		20.3333	19.3333		30	20.3333		28.3333	15.6667		4.10264	3.31145	2.70843	2.22968	2.06278	1.90773	1.84852	3.712	3.06974	2.63103	2.31793	2.16318	2.05295	1.9823		2.79782	2.64464		3.77499	2.98178		5.96237	3.87794
	0	0		12	22.3333		20.3333	30	28.3333	19.3333	20.3333	15.6667		1	27.3333		5	20		12	22.3333		11	19.6667		9.19546	7.69011	6.5955	5.68251	5.17617	4.85682	4.49886	7.26348	5.62268	4.48685	3.67126	3.32522	3.13724	3.06454		0.236293	5.20754		0.930555	5.20735		2.13067	5.46122
	0	0		16.3333	4.33333		5	12	11	20	22.3333	19.6667		12.6667	3.33333		8	3		16.3333	3		12.3333	4.33333		3.10665	2.68053	2.36169	2.0156	1.84863	1.7661	1.69643	6.5579	6.10413	5.8099	5.57748	5.48638	5.41153	5.33585		1.53372	0.523562		1.18434	0.543684		2.91231	0.528862
	0	0		25	11.6667		8	16.3333	12.3333	3	3	4.33333		21	9.33333		25	11.6667		5.66667	9.33333		15.6667	6.66667		3.13865	2.77402	2.51349	2.28971	2.16324	2.09399	2.04646	1.60554	1.21794	0.971619	0.788132	0.712573	0.667385	0.626099		3.88138	2.02927		3.32679	1.97819		0.850783	2.6099
	0	0		8	12		25	5.66667	15.6667	11.6667	9.33333	6.66667		6.33333	12		7	11.6667		7.66667	11		8	11.3333		3.53074	3.17429	2.82232	2.48857	2.40803	2.29969	2.24125	3.9043	3.25968	2.81825	2.49551	2.3965	2.30054	2.25293		1.18872	2.31091		1.29349	2.22004		1.14215	2.20847
	0	0		10.6667	6.66667		7	7.66667	8	11.6667	11	11.3333		9	2.66667		10.6667	3.66667		9.66667	6.66667		10.3333	4.33333		2.10494	1.77198	1.5097	1.28183	1.1894	1.08896	1.00605	4.54645	3.7256	3.1601	2.78909	2.60457	2.53426	2.46303		1.70247	0.509122		1.69199	0.598241		1.42452	1.34679
	0	0		14.3333	8		10.6667	9.66667	10.3333	3.66667	6.66667	4.33333		5.33333	2.66667		12.3333	6.33333		14.3333	7.33333		12.6667	8		4.8755	3.64032	2.71183	1.98596	1.68314	1.48024	1.30492	1.78768	1.45386	1.22772	1.07368	0.979848	0.942775	0.897577		1.01151	0.414423		1.76082	1.27232		2.47092	1.59225
	0	0		19	7		12.3333	14.3333	12.6667	6.33333	7.33333	8		15	3		14.3333	7		18.3333	5.66667		17.3333	3		3.80046	3.37625	3.00358	2.7045	2.48802	2.40874	2.25922	2.57355	2.1032	1.78441	1.55369	1.43192	1.3655	1.30709		3.25427	0.489666		2.09541	1.36499		3.20705	1.2695
	0	0		12	8.66667		14.3333	18.3333	17.3333	7	5.66667	3		9.33333	5		8.66667	5.33333		6.66667	8.66667		12	2.33333		6.64452	5.1849	4.17577	3.43628	3.19738	2.96402	2.84549	2.29254	1.82341	1.49727	1.29524	1.222	1.16344	1.12837		1.66384	1.16101		0.982338	0.854113		0.992414	1.49181
	0	0		16.6667	17.3333		8.66667	6.66667	12	5.33333	8.66667	2.33333		13.3333	9.33333		10.6667	14.6667		12.6667	13.6667		16	16		1.86441	1.52992	1.29221	1.09351	0.962425	0.902866	0.850546	1.87312	1.56308	1.33041	1.17196	1.09595	1.03444	1.01075		2.34992	1.3172		2.20252	2.43559		2.35435	2.59488
	0	0		21.6667	8		10.6667	12.6667	16	14.6667	13.6667	16		14	7.33333		15.6667	7.33333		21.6667	4.66667		21.6667	4		4.65337	3.87307	3.29852	2.8062	2.53411	2.38202	2.2679	5.36578	4.23587	3.49349	2.98854	2.75877	2.64958	2.51162		2.79884	1.40752		1.66045	1.4698		3.30364	1.00781
	0	0		4.33333	14.3333		15.6667	21.6667	21.6667	7.33333	4.66667	4		5	11.3333		4.33333	8.66667		2.66667	14		3.33333	10.6667		5.03089	4.51173	4.07114	3.63216	3.34745	3.16823	2.98175	2.89429	2.29504	1.91993	1.6924	1.58369	1.53089	1.48761		0.878324	2.07015		0.653468	1.64246		0.527659	2.20968
	0	0		27.3333	6.33333		4.33333	2.66667	3.33333	8.66667	14	10.6667		30.3333	5		22.6667	4.66667		27.3333	6		23.3333	5.33333		1.49907	1.16547	0.937238	0.737977	0.641972	0.587865	0.536536	4.5296	3.61236	2.93396	2.40064	2.12731	1.98501	1.85341		3.68168	1.06818		2.59658	0.754999		3.16864	1.17846
	0	0		4.33333	10.3333		22.6667	27.3333	23.3333	4.66667	6	5.33333		1.33333	5.66667		3.66667	10.3333		4.33333	7.33333		3.66667	5.33333		4.5758	4.13627	3.70276	3.23969	2.90288	2.78134	2.5596	2.87257	2.14102	1.62113	1.30911	1.16638	1.09151	1.05735		0.2768	1.21689		0.669442	1.47099		0.777929	1.14538
	0	0		12.6667	19.3333		3.66667	4.33333	3.66667	10.3333	7.33333	5.33333		8.66667	11.6667		12	15.3333		12.3333	15		12.6667	19.3333		1.48359	1.14114	0.926516	0.769561	0.689306	0.638517	0.619161	2.14491	1.74348	1.49317	1.29139	1.1822	1.14998	1.07172		1.51979	2.11762		2.07403	2.36114		2.2433	2.60904
	0.666667	2.66667		13.3333	28		12	12.3333	12.6667	15.3333	15	19.3333		7	19		9.66667	25.3333		11	23		11	25.3333		4.5471	3.66079	3.00859	2.5047	2.2834	2.14664	2.00386	4.50803	3.87805	3.3543	2.95076	2.69651	2.57341	2.40797		1.22378	3.17251		1.64295	4.5752		1.77078	4.11222
	0	0		15.3333	10.6667		9.66667	11	11	25.3333	23	25.3333		6.33333	5.33333		12.3333	10.6667		11.6667	8.66667		15.3333	9.66667		4.42366	3.40447	2.70033	2.24146	2.01996	1.95269	1.86139	8.93674	7.4781	6.34853	5.42678	4.93342	4.71235	4.43836		1.02263	1.09275		2.54434	2.10883		2.15874	1.77035
	0.333333	15.3333		19.3333	56		12.3333	11.6667	15.3333	10.6667	8.66667	9.66667		16	25.6667		14.6667	35.6667		18.6667	39.3333		13.6667	33.6667		5.14677	4.09867	3.29254	2.724	2.45573	2.32708	2.19154	3.5682	2.94305	2.50807	2.20343	2.03607	1.94442	1.88774		2.66005	4.58822		2.55975	5.22888		3.1406	6.27351
	4.66667	0.333333		19.6667	20.6667		14.6667	18.6667	13.6667	35.6667	39.3333	33.6667		10.3333	18.3333		10	14.3333		11.6667	17		10.6667	19		5.82501	4.74237	3.95051	3.28117	2.94324	2.75605	2.67466	12.081	9.83454	8.201	6.89047	6.32627	5.92679	5.74326		1.95796	2.69523		1.8431	1.85384		2.18608	2.28551
	0	0		23	19.3333		10	11.6667	10.6667	14.3333	17	19		17.6667	9		15.5	9.33333		18.6667	17.3333		23	10.3333		5.42146	4.26209	3.50202	3.00963	2.81719	2.7183	2.67413	5.56803	4.40563	3.64828	3.0711	2.70811	2.61169	2.42988		3.06277	1.49507		2.46518	1.76294		3.35079	2.7256
	0	0		14.6667	22.3333		15.5	18.6667	23	9.33333	17.3333	10.3333		2	11.3333		5.33333	13.6667		14.6667	22		9.33333	22.3333		4.95627	4.28974	3.7698	3.32577	3.0586	2.89058	2.76068	5.1103	4.18367	3.58854	3.22926	3.06502	3.00594	2.94049		0.339366	1.89374		0.723968	2.69699		2.19959	4.09163
	0	0		10.3333	11		5.33333	14.6667	9.33333	13.6667	22	22.3333		1.33333	3.66667		5.33333	9		9.33333	10		10.3333	11		2.98669	2.56685	2.21438	1.91445	1.68751	1.59031	1.41547	6.27855	5.30107	4.62955	4.10695	3.79068	3.67112	3.5542		0.221687	0.651149		0.825788	2.09772		2.00373	2.22138
	0	0		13.3333	6		5.33333	9.33333	10.3333	9	10	11		11.3333	5.66667		13.3333	5.66667		13	6		10.5	5.66667		2.62397	2.21988	1.96208	1.80619	1.71261	1.6246	1.59263	3.61727	3.09676	2.7488	2.51902	2.40823	2.3493	2.28399		2.41662	1.16445		2.5529	0.821091		2.01391	1.17785
	0	0		11.3333	6		13.3333	13	10.5	5.66667	6	5.66667		4.33333	5.33333		9	4.66667		11.3333	4.66667		5.33333	5.66667		3.85595	3.24299	2.78289	2.4334	2.27238	2.08552	2.03848	2.19561	1.75746	1.465	1.21507	1.09934	1.01663	0.982296		0.793807	1.00058		1.0526	0.914101		1.26172	0.828223
	0	0		9	7.66667		9	11.3333	5.33333	4.66667	4.66667	5.66667		1.66667	8.66667		5.33333	4.66667		9	7.66667		6.66667	6.66667		3.25059	2.50554	1.7966	1.32818	1.12049	1.03782	0.925424	2.77509	1.98776	1.41561	1.02218	0.854139	0.735206	0.677776		0.355008	2.27996		0.758317	0.977474		1.48887	1.27503
	0	0		10.3333	8.66667		5.33333	9	6.66667	4.66667	7.66667	6.66667		2.33333	3.33333		5.33333	7.66667		10.3333	8.66667		8	7.33333		2.41571	1.9741	1.62693	1.33995	1.2376	1.09007	0.993252	2.28323	1.88829	1.64892	1.44242	1.35287	1.28102	1.26302		0.362698	0.802653		0.632611	1.32178		1.61612	1.77264
	0	1.33333		15.6667	21.6667		5.33333	10.3333	8	7.66667	8.66667	7.33333		8	6		11.6667	15.6667		11	20.3333		15.6667	15		2.09211	1.77779	1.50714	1.30624	1.14644	1.11284	1.01642	3.1225	2.56199	2.13725	1.82364	1.63841	1.54488	1.47609		1.73598	1.13551		2.27262	2.77623		2.38467	3.31853
	0	0		16.3333	9		11.6667	11	15.6667	15.6667	20.3333	15		10.3333	13.3333		10.3333	8.66667		12.6667	8.66667		16.3333	9		3.89677	3.35266	2.93793	2.59142	2.40861	2.28268	2.17761	5.93918	4.73494	3.88453	3.24295	3.02779	2.83494	2.73117		1.67118	2.14675		1.10429	1.51439		1.99425	1.35289
	0	0		12	12.3333		10.3333	12.6667	16.3333	8.66667	8.66667	9		10	7.66667		7	9		11.6667	12		12	12.3333		3.26553	2.84292	2.47925	2.06781	1.84785	1.70636	1.53232	3.01499	2.42245	2.00277	1.63288	1.40299	1.28584	1.22005		2.105	1.67592		0.874701	1.34294		1.37078	1.55696
	0	0		17	21.6667		7	11.6667	12	9	12	12.3333		3.66667	2.66667		3.66667	21.6667		17	14.3333		9.66667	13		2.79137	2.39351	2.10985	1.7767	1.64992	1.55731	1.46356	3.92557	3.09005	2.51889	2.11546	1.90825	1.79376	1.7345		0.47506	0.447356		0.446541	3.77394		2.84068	3.44442
	0	0		24	7		3.66667	17	9.66667	21.6667	14.3333	13		15.3333	7.33333		24	5		16.6667	6.66667		18.3333	7		3.25031	2.86663	2.53606	2.20135	2.02867	1.94787	1.84114	6.15623	5.24779	4.64153	4.15877	3.8805	3.70776	3.58118		2.32957	1.3698		3.46061	0.749218		2.57316	1.35879
	0	0		11.5	7.33333		24	16.6667	18.3333	5	6.66667	7		6	3		11.5	6.33333		9	5.33333		8	7.33333		4.34505	3.92018	3.57283	3.16758	2.81127	2.63557	2.52653	2.18672	1.76848	1.50134	1.29074	1.2207	1.14143	1.11211		1.28235	0.430606		1.96922	0.830852		0.906751	1.20236
	0	0		17.6667	12.3333		11.5	9	8	6.33333	5.33333	7.33333		6.33333	8.66667		17.6667	12		17.6667	11.3333		16.6667	12.3333		2.60698	2.22463	1.90385	1.62489	1.46626	1.40493	1.30495	2.33038	1.88232	1.58717	1.37572	1.29754	1.23191	1.21892		1.27049	1.7347		3.54285	2.00921		2.85962	2.42665
	0	0		19	11		17.6667	17.6667	16.6667	12	11.3333	12.3333		13.6667	11.3333		13.6667	10.3333		15.3333	7.66667		19	11		5.99209	5.16998	4.39739	3.70939	3.27631	3.12602	2.94731	4.4644	3.75616	3.21406	2.74126	2.47521	2.28851	2.10246		2.93979	2.15047		2.79818	2.22782		2.52021	2.05152
	0	0		17.3333	14		13.6667	15.3333	19	10.3333	7.66667	11		14.6667	6		7.33333	9.66667		12.3333	10.3333		17.3333	13.3333		5.05243	4.22698	3.56807	3.02178	2.73848	2.52828	2.37761	4.22277	3.38284	2.87036	2.49413	2.3743	2.2679	2.21572		2.1468	1.03495		1.36453	1.85978		2.21425	2.20647
	0	0		17.6667	9.33333		7.33333	12.3333	17.3333	9.66667	10.3333	13.3333		13	6.66667		17	9.33333		17	9		17.6667	9		3.81037	3.36416	2.90171	2.34624	2.0112	1.85019	1.65383	4.75603	3.88484	3.23697	2.82577	2.58698	2.4712	2.39566		2.27636	1.30888		3.61968	2.12464		2.50992	2.24883
	0	0.333333		16	17		17	17	17.6667	9.33333	9	9		3	12		8	10.3333		16	16		9	13.6667		6.34156	5.60143	4.91579	4.24532	3.81213	3.57101	3.32466	3.85541	3.19225	2.75944	2.42407	2.27144	2.18029	2.11584		0.452997	2.46546		1.00086	2.16368		3.671	2.72308
	0	0		17.3333	10		8	16	9	10.3333	16	13.6667		12.3333	7		17.3333	7.66667		16.6667	9		14.3333	9.66667		3.96535	3.55087	3.16916	2.83814	2.57682	2.43777	2.3916	5.35605	4.29517	3.54337	3.09961	2.86318	2.7151	2.65451		2.30603	1.09249		3.31936	1.58392		2.52455	1.87418
	0	0		17	16.6667		17.3333	16.6667	14.3333	7.66667	9	9.66667		23	8.33333		16.3333	16.6667		6.66667	7.5		17	10.6667		5.35455	4.58039	3.92366	3.33558	3.00055	2.83559	2.71338	4.03081	3.04356	2.45824	2.0626	1.90393	1.81453	1.76942		3.68526	1.69129		3.83842	3.03706		0.97286	1.5117
	0	0		5	15.6667		16.3333	6.66667	17	16.6667	7.5	10.6667		5	17		4.66667	10.6667		4.33333	12.6667		5	15.6667		5.13198	4.56611	4.07499	3.68729	3.51635	3.38635	3.28041	4.12259	3.59572	3.27413	3.02912	2.93604	2.87362	2.80807		1.16279	3.21842		0.922078	2.35583		0.83664	2.47003
	0	2		23.6667	27.3333		4.66667	4.33333	5	10.6667	12.6667	15.6667		5.66667	12.6667		16	21		23.6667	20		18	24.6667		1.99926	1.55006	1.24011	0.990824	0.883165	0.796637	0.752813	4.3343	3.8501	3.32077	2.78168	2.57197	2.26088	2.17871		1.04919	2.57576		3.25585	3.73392		4.56219	4.2883
	0	0.666667		22	19.3333		16	23.6667	18	21	20	24.6667		7.33333	12.3333		13.3333	15.3333		22	11		10.6667	10.6667		7.51101	6.51539	5.41674	4.46654	4.00184	3.66871	3.31399	7.97705	6.66918	5.6381	4.6781	4.26099	3.91343	3.61774		1.35677	2.29191		1.96498	2.78957		2.85963	1.8745
	0	0		19	6.33333		13.3333	22	10.6667	15.3333	11	10.6667		2.33333	5.33333		7	6		19	6.33333		9	5		4.48707	3.74588	3.13638	2.59355	2.36965	2.21215	2.01764	5.04401	4.03412	3.37117	2.93451	2.73332	2.65945	2.58234		0.35224	1.04182		1.22123	1.34062		3.96013	1.4836
	0	0		16.6667	11.6667		7	19	9	6	6.33333	5		6	10		15.3333	11.6667		16.6667	9.66667		12.5	9.66667		4.74792	4.13427	3.72561	3.40441	3.23997	3.11353	3.00294	2.43489	1.98636	1.67828	1.44295	1.3208	1.24498	1.20299		0.83177	1.9034		2.98579	2.46848		3.97886	1.94877
	0	0		6	15.3333		15.3333	16.6667	12.5	11.6667	9.66667	9.66667		9.66667	10.3333		6	14.3333		5.66667	11.6667		5.33333	13.3333		5.12356	4.35944	3.81682	3.43399	3.27604	3.19235	3.1361	4.27183	3.51607	2.97374	2.56439	2.39537	2.26175	2.14186		2.02139	2.17061		1.26152	2.04267		1.18903	2.00075
	0	0		11.3333	6		6	5.66667	5.33333	14.3333	11.6667	13.3333		5	5.33333		11	5.33333		10	5.66667		11.3333	5.66667		2.50801	1.96929	1.60316	1.34614	1.23663	1.17359	1.1255	5.19318	4.0538	3.28595	2.69575	2.4521	2.30363	2.23936		0.764132	1.00331		2.10835	0.937827		1.92097	1.08482
	0	0		5	13.6667		11	10	11.3333	5.33333	5.66667	5.66667		5.33333	8		4	4.33333		5	13.6667		3.5	13.3333		3.52245	2.89183	2.45331	2.12501	1.89864	1.86387	1.68016	3.14062	2.23884	1.61587	1.17744	1.02041	0.886462	0.809674		1.08119	1.69472		0.898557	0.770388		0.948659	3.02458
	0	0		10	8.33333		4	5	3.5	4.33333	13.6667	13.3333		6	1		6.33333	3		10	5.66667		9.33333	8.33333		1.89863	1.47173	1.1523	0.962941	0.850723	0.786093	0.75028	4.39042	3.84296	3.46632	3.19609	3.0582	2.98723	2.93736		1.45216	0.159337		1.21553	0.406627		1.9683	1.1382
	0	0		11.3333	16		6.33333	10	9.33333	3	5.66667	8.33333		2.33333	10.6667		4	16		11.3333	11.3333		11.3333	10.3333		2.87718	2.3888	2.04284	1.75852	1.60163	1.53146	1.47851	2.42164	2.05703	1.82904	1.6603	1.58687	1.55919	1.52065		0.437744	1.95286		0.812653	2.87912		1.72115	1.51498
	0	0		11.6667	7.33333		4	11.3333	11.3333	16	11.3333	10.3333		1	1.33333		3.66667	4.66667		7	6.66667		11.6667	7.33333		2.92007	2.37872	1.95561	1.65237	1.55841	1.42451	1.3636	3.90205	3.34802	3.0065	2.74018	2.6238	2.56875	2.51087		0.202373	0.234715		0.505203	0.737534		1.25615	0.996809
	0	0		8	8		3.66667	7	11.6667	4.66667	6.66667	7.33333		0.666667	2		2	6.66667		3.33333	8		8	6.66667		2.36426	1.9911	1.76953	1.61362	1.52625	1.4846	1.39773	1.85498	1.47572	1.25951	1.02861	0.976083	0.917023	0.875082		0.125109	0.293766		0.215878	1.40732		0.543264	1.25589
	0	1.33333		6.66667	16.3333		2	3.33333	8	6.66667	8	6.66667		5.33333	10.3333		4.66667	14.6667		5.33333	11		6.66667	9.66667		2.29472	1.8638	1.61462	1.43422	1.3746	1.33036	1.29234	2.84344	2.20324	1.77301	1.47623	1.33517	1.25437	1.19401		1.18083	1.82775		0.728393	2.11366		1.05391	2.2041
		1			13		4.66667	5.33333	6.66667	14.6667	11	9.66667			10.6667			11			11.3333			9.33333		2.36368	1.82135	1.43397	1.15768	1.05534	0.98725	0.943772	4.69252	3.62266	2.91205	2.43387	2.18792	2.05532	1.97925			1.83198			1.87572			1.66951
		1			16					11	11.3333	9.33333			8.66667			8.66667			13.6667			12.3333									4.3561	3.27742	2.58441	2.07712	1.86732	1.72633	1.64434			1.55975			1.66455			2.3966
		0			7					8.66667	13.6667	12.3333			4			3.33333			5.33333			7									5.81037	4.47216	3.6434	3.07179	2.83242	2.75098	2.60455			0.844293			0.654521			1.10875
		0			8					3.33333	5.33333	7			3.66667			5.33333			8			7.33333									2.7305	2.1295	1.75569	1.52998	1.43826	1.39963	1.36662			0.775606			1.12124			1.63012
		0			7.33333					5.33333	8	7.33333			6.66667			7.33333			5.33333			7.33333									3.30768	2.47136	1.93999	1.56463	1.43943	1.34969	1.31794			1.47334			1.34023			1.08008
		1.33333			23.6667					7.33333	5.33333	7.33333			14.6667			20			12.6667			11.6667									2.62889	2.11482	1.77801	1.51571	1.39867	1.33429	1.26035			2.29181			3.49385			2.09531
		0			10.3333					20	12.6667	11.6667			10			8.33333			9			10									5.47336	4.55599	3.99139	3.60094	3.42793	3.322	3.25538			1.88826			1.50513			1.74649
		0			22.6667					8.33333	9	10			10.3333			4			21.3333			19.3333									3.94053	2.98613	2.35037	1.93025	1.70696	1.5775	1.4982			2.14997			0.836532			5.03777
		0			9.66667					4	21.3333	19.3333			6.66667			9.66667			9.66667			7.66667									8.04522	7.19744	6.69193	6.37305	6.22553	6.17414	6.11897			1.64492			1.90305			1.79008
		0			6.33333					9.66667	9.66667	7.66667			7.66667			5			5.33333			6.33333									3.71158	2.86445	2.31637	1.90427	1.6839	1.54626	1.49317			1.15631			1.04155			0.988453
		0			8.66667					5	5.33333	6.33333			3			8.66667			7.33333			8.33333									2.49306	1.88088	1.44992	1.13868	0.99556	0.925644	0.853922			0.42256			2.03858			1.7398
		0			23.3333					8.66667	7.33333	8.33333			13			14.3333			23.3333			12.6667									3.67192	2.92919	2.42143	2.0537	1.89383	1.77602	1.72632			2.65024			3.04303			4.42848
		0			13.6667					14.3333	23.3333	12.6667			8.33333			12.6667			4.66667			9									5.56935	5.04418	4.56678	4.05074	3.74293	3.55074	3.38647			1.58824			2.06402			0.942201
		0			15.3333					12.6667	4.66667	9			7.66667			15.3333			10.3333			10.6667									3.46028	2.89152	2.52456	2.27292	2.1602	2.11537	2.04178			1.29843			2.50025			1.94806
		0			11					15.3333	10.3333	10.6667			7.66667			7			10.6667			10.3333									4.08142	3.28427	2.78476	2.40675	2.2666	2.18572	2.12375			1.62397			1.40519			1.85412
		0			6.66667					7	10.6667	10.3333			5.66667			6.66667			5			5.66667									4.04765	3.14723	2.55209	2.10813	1.88511	1.77018	1.69459			1.11314			1.12821			1.00918
		0.666667			21.6667					6.66667	5	5.66667			15.3333			21			9.33333			14.3333									2.80634	2.1435	1.65222	1.28945	1.14413	1.02895	0.98579			3.23825			2.8432			1.87691
		9.33333			25.6667					21	9.33333	14.3333			13			14.3333			16.3333			15.6667									4.58821	3.66246	3.03901	2.51705	2.34101	2.18184	2.06753			2.50605			2.49815			2.60401
		0			5.33333					14.3333	16.3333	15.6667			4			5			4.66667			3.66667									7.35637	5.57391	4.31421	3.22202	2.63972	2.39867	2.20269			0.90461			0.874022			0.811206
		0			5.66667					5	4.66667	3.66667			4.66667			3.66667			5.66667			4.33333									2.66694	1.89189	1.37412	1.02848	0.890863	0.806874	0.752491			0.895317			0.620598			0.921265
		0			12.6667					3.66667	5.66667	4.33333			8.66667			9			12.6667			6									2.51235	1.82202	1.34012	0.995087	0.881399	0.790577	0.747065			1.63069			1.30087			1.48668
		0			10					9	12.6667	6			8.66667			9.66667			7			10									2.65436	2.17214	1.78645	1.5058	1.30102	1.2286	1.10279			1.71432			1.8425			1.29792
		0			13					9.66667	7	10			2.66667			6.33333			13			12.3333									3.35816	2.71926	2.27967	1.95154	1.80019	1.70147	1.60598			0.383281			1.07035			2.5304
		0			16					6.33333	13	12.3333			8			9.66667			12			13.3333									4.77633	4.06143	3.63658	3.33637	3.21494	3.14936	3.11541			1.45506			2.04776			2.1812
		0.666667			14.6667					9.66667	12	13.3333			9			10			11.3333			14									5.63285	4.61474	4.02319	3.65374	3.48237	3.3975	3.3448			1.56947			1.74479			2.45132
										10	11.3333	14																					5.11463	3.95411	3.15361	2.60685	2.43463	2.27378	2.22868
[truncated: 8 more columns]
