# Supplementary material for: Suppressed prefrontal neuronal firing variability and impaired social representation in IRSp53-mutant mice
Source: eLife. 2022 Nov 1;11:e74998. doi: 10.7554/eLife.74998 (PMC9662818; doi:10.7554/eLife.74998)
Supplement: Figure 5—figure supplement 2—source data 1. — The excel file contains the numerical data used to generate Figure 5—figure supplement 2B–E. [file elife-74998-fig5-figsupp2-data1.xlsx]

## Sheet: Fig5_S2
	Fig 5_S2B	E-E Maximum ΔFR		Fig 5_S2C	First S-O Maximum ΔFR		Fig 5_S2D	Second S-O Maximum ΔFR		Fig 5_S2E	Normalized maximum ΔFR
	WT	KO		WT	KO		WT	KO		WT			KO
	0.23988	0.5964		0.378799	1.23944		0.271897	0.580298		E-E	First S-O	Second S-O	E-E	First S-O	Second S-O
	0.705169	0.390013		1.52677	0.343743		2.23482	0.529183		0.203812	0.425795	0.281432	0.490467	1	1
	1.44365	1.13781		1.14319	1.15915		2.24404	0.860894		0.0216119	0.0517723	0.124505	0.527249	0.218334	0.2861
	1.1976	0.408605		0.60688	0.389617		4.08269	0.212385		0.0952035	0.203675	0.272066	0.252024	0.109992	0.0434068
	1.0388	0.41502		5.39113	0.546425		5.31651	0.334174		0.0664731	0.0573918	0.267376	0.0821011	0.132351	0.608111
	0.149663	1.60681		1.81167	0.690573		0.487243	0.188802		0.240235	0.75646	0.698233	0.140187	0.181821	0.435138
	0.722538	1.14006		0.456884	0.478456		0.793725	1.75501		0.0229568	0.279858	0.259724	0.325646	0.115689	0.0446385
	0.443506	0.231172		0.583728	0.476672		0.427919	0.98635		0.175223	0.774186	1	0.460215	0.121211	0.451143
	0.708316	1.57456		1.32127	0.561415		0.231515	0.341757		0.152272	0.602491	1	0.16237	0.226513	0.589818
	0.0298753	0.563144		0.391274	0.0546212		0.373624	0.442959		0.0668664	0.249204	0.0427078	0.078347	0.0288368	0.067299
	0.212934	1.80564		0.462588	1.16813		0.830718	3.83587		0.0822165	0.381544	0.446544	0.228408	0.235699	0.202658
	0.899076	0.970605		0.650152	0.257124		1.79924	0.431055		0.21781	0.181789	0.861165	0.070009	0.0579051	0.0640973
	0.888441	1.67139		0.897953	1.69195		0.361698	1.27884		0.0875209	0.204448	0.455408	0.395415	0.101795	0.882149
	1.08436	2.52018		1.78849	0.490857		2.71792	2.99436		1	0.879741	1	0.105231	0.112234	0.114929
	0.358508	1.87167		2.44201	1.29082		2.6188	1.94474		0.400074	0.393085	0.231187	0.258943	0.0730961	0.0444517
	0.646724	0.644368		2.1281	0.441601		2.74969	1.08284		0.0550718	0.412077	0.419867	0.325583	0.211488	0.206137
	4.34467	2.51843		4.05034	4.79283		4.4973	0.971239		0.0569068	0.186564	0.118528	0.548722	0.723962	0.797242
	0.806317	2.11321		0.532841	1.91283		2.15863	4.00559		0.195052	0.165154	0.126913	0.410475	0.467486	0.203868
	0.518232	1.09599		1.12052	3.64181		0.603961	1.59591		0.191578	0.119932	0.351742	0.322088	0.316391	0.264903
	2.00268	0.525264		1.92549	0.960295		1.28538	1.18581		0.206126	0.491593	0.197769	0.12139	0.417213	0.29133
	0.823228	1.58516		1.21473	6.92077		1.61433	4.25527		0.401484	0.843579	0.741294	0.390217	0.55478	0.657784
	2.92742	0.307047		3.23149	0.746207		1.74523	1.29306		0.674639	0.603164	1	0.180216	0.76794	0.33144
	0.676894	0.945194		0.721645	0.668137		0.322206	1.15839		0.129632	0.182973	0.0786002	0.516693	0.908546	0.692907
	0.730261	0.807629		0.466523	0.290191		0.124368	0.798757		1	0.771821	0.236222	0.207048	0.181537	0.243486
	4.20854	0.603676		3.03658	3.15976		1.81061	10.0825		0.561484	0.613403	0.445108	0.374454	0.20408	0.716333
	0.687763	0.496145		2.37287	0.776811		4.13473	2.1189		0.411252	0.358675	0.333969	0.356642	0.897748	0.819402
	0.915102	1.0845		0.911615	1.01017		0.493776	2.42071		0.031488	0.0946366	0.132489	0.168953	0.234328	0.440328
	0.221019	2.43348		2.32355	0.544735		2.14425	2.64441		0.196278	0.124918	0.300787	0.327403	0.209135	0.467633
	4.39868	0.648733		2.35087	0.306515		4.78335	3.33827		0.0126955	0.123664	0.0943097	0.544989	0.28353	1
	1.47819	4.71717		1.16191	5.60297		1.344	11.9849		0.155465	0.0932046	0.183749	1	0.230773	0.745152
	2.63126	0.312076		2.52442	0.377452		3.12251	0.609745		0.29113	0.169825	0.0218286	0.242792	0.346952	0.534819
	1.65711	0.42123		3.07673	0.392668		2.54272	0.129673		0.248317	0.288061	0.498897	0.213993	0.171776	0.522101
	1.06671	0.33992		0.872864	0.870128		0.756327	1.48336		0.141879	0.37891	0.35058	0.187237	0.239526	0.179463
	0.568532	0.499065		1.28201	1.13483		0.847322	0.957134		0.545257	1	0.340807	0.137571	0.502787	0.693412
	0.170135	2.11197		0.248921	3.22199		0.362674	3.08496		0.276472	0.689707	0.207196	0.25944	0.665321	0.657253
	0.717388	1.17584		2.07757	0.901656		0.772467	0.47785		0.367822	0.179348	0.407498	0.258101	0.452035	0.329442
	0.464143	2.32891		0.365338	2.16458		0.317404	1.85827		0.294883	0.788542	0.882123	0.44081	0.378542	0.217923
	0.264024	0.250773		0.663779	0.866064		0.619715	1.08581		0.174811	0.277219	0.271918	0.243282	0.300983	0.195408
	0.390546	0.29347		1.06576	0.0799633		0.528651	1.28669		0.634609	0.280812	0.700733	0.236061	0.260236	0.299961
	1.06002	0.219076		0.301424	0.220789		0.954198	0.858178		0.435532	0.400109	0.374049	0.406462	0.0765706	0.441216
	0.352928	0.63199		0.953739	1.2832		2.83236	2.75814		0.17147	0.06245	0.186087	0.720535	0.349354	0.568438
	1.87218	0.881189		1.87043	2.0585		3.40695	3.10276		0.0530767	0.169752	0.454015	0.114118	0.265511	0.295285
	0.71617	0.563817		0.716475	1.67079		0.380948	1.21487		0.104077	0.150417	0.262636	0.0403959	0.306655	0.491688
	0.564792	0.314936		0.581103	4.52783		0.583918	2.12094		0.144186	0.261152	0.175323	0.187391	0.349677	0.205405
	1.17925	1.61371		2.39043	1.76745		0.783307	1.43677		0.283511	0.391547	0.247983	0.589432	0.496123	0.504548
	1.88824	3.80355		5.12967	4.48122		0.7549	1.22892		0.100675	0.316883	0.13031	0.156814	0.425157	0.223911
	1.10462	0.846629		0.203223	1.18417		2.75482	2.2461		0.141209	0.301551	0.0514602	0.275366	0.352267	0.291681
	0.373748	1.67357		2.07078	1.17208		1.69814	2.18135		0.595302	0.144298	0.841962	0.737364	0.595301	0.669992
	1.25937	0.413142		1.66161	2.03736		4.59253	0.588003		0.0547892	0.273929	0.047012	0.452252	0.276033	0.382989
	0.692616	0.379154		1.99114	0.608585		3.2794	0.527421		0.127195	0.117299	0.166475	0.115848	0.233292	0.0645689
	4.29572	2.41664		1.89705	4.30712		4.0608	0.992209		0.0290203	0.152377	0.0717074	0.0893365	0.441684	0.307666
	0.364533	0.431182		0.405441	0.288727		1.26406	4.22428		0.357865	0.161115	0.231838	0.0868271	0.170205	0.0458905
	0.466995	2.8516		0.100975	1.88336		2.02945	4.55578		0.189579	0.371345	0.671549	0.104246	0.116194	0.496083
	0.0195614	0.227261		1.46402	0.0583479		0.68481	0.902593		0.18628	0.0919868	0.698899	0.474511	0.241306	0.0196108
	1.98297	0.267064		1.77371	0.586073		1.93658	0.249979		0.020101	0.527254	0.338751	0.237976	0.0387492	0.0956516
	1.86794	0.339133		1.10238	0.750877		0.334174	0.578681		0.321068	0.411654	0.453728	0.239004	0.0429622	0.0181085
	0.223778	0.277268		0.651437	0.477708		0.172729	0.855994		0.290131	0.310285	0.181336	0.117657	0.381317	0.333288
	2.17147	0.897319		3.57338	1.03473		2.5202	2.24583		0.460449	0.46227	0.348683	0.0537035	0.454171	0.295544
	2.47136	0.642296		0.997175	0.197999		0.140336	0.381609		0.154785	0.222144	0.225221	0.0917373	0.114449	0.225594
	4.61541	0.439227		1.00626	0.520581		0.601203	0.284827		0.246058	0.70557	0.818841	0.395096	0.27356	0.559952
	1.19669	2.48588		2.72731	3.62852		1.67134	4.84385		0.42778	0.121806	0.0942314	0.149993	0.176412	0.0713224
	0.305049	0.466953		0.642845	1.57329		1.8318	0.313268		0.469113	0.455014	0.407651	0.124798	0.177343	0.203844
	2.20209	0.939663		2.70098	3.06192		3.04435	3.41004		0.635046	0.329557	0.200317	0.100149	0.266238	0.276319
	1.29861	0.483234		6.55119	0.582226		2.73217	0.261126		0.239726	0.230703	0.21352	0.166683	0.303492	0.435389
	0.931632	0.782922		1.20479	0.659292		0.375322	0.901588		0.129097	0.356356	0.0192255	0.132488	0.193925	0.0766092
	0.793984	0.0887105		0.129038	0.507478		0.220463	0.457351		0.148287	0.786509	0.588556	0.068347	0.0702028	0.108164
	0.75429	0.782222		1.90855	0.616428		0.222814	1.49283		0.389673	0.090458	0.409259	0.0729776	0.542414	0.537688
	0.504341	1.05153		1.11676	0.461738		0.507958	1.03767		0.482385	0.743173	0.946916	0.0993766	0.0383395	0.0859346
	0.383605	0.553741		0.126205	2.02509		2.33308	1.68227		0.397294	0.31142	0.301227	0.309765	0.348623	0.257188
	1.38425	0.418681		2.01989	0.529111		10.0747	2.15765		0.0914469	0.013686	0.47156	0.0868674	0.241467	0.250893
	2.60044	0.208902		1.64587	1.14985		2.63046	0.253595		0.0589782	0.0564711	0.162724	0.17566	0.345206	0.590143
	1.23199	0.503333		2.39265	0.40498		2.69529	0.979334		0.588142	0.530255	0.538929	0.0917967	1	0.112849
	0.191155	0.411158		0.572624	0.384208		0.725881	0.549475		0.0649311	0.180881	0.04507	0.416402	0.301868	0.512759
	0.545475	1.02123		2.61721	2.02083		1.70254	0.426182		0.0540752	0.216807	0.30827	0.0751683	0.0649153	0.118749
	0.458177	0.954861		0.534261	0.726277		0.743271	1.33876		0.444991	0.432873	0.0485526	0.0785492	0.151826	0.0197246
	0.342029	0.997839		0.655922	0.592433		0.801163	0.885764		0.25086	0.30693	0.240897	0.224176	0.172128	0.124858
	0.961386	0.33715		1.94266	0.715744		2.30044	0.387175		0.174152	0.42526	0.575219	0.265062	0.417802	0.424149
	3.3826	0.923619		3.33925	1.00384		0.878085	1.72009		0.636293	0.53913	0.483345	0.283534	0.462294	0.126713
	3.909	0.238032		1.73996	0.471118		1.80343	0.0960474		0.304156	0.603222	0.178586	0.36723	0.369546	0.129866
	1.27373	2.05366		1.38055	2.83879		2.65826	2.31731		0.209144	0.0996073	0.0673284	0.167746	0.455573	0.190125
	1.73804	0.279386		2.36737	0.209621		3.08222	0.33752		0.168907	0.734657	0.595056	0.152872	0.269775	0.0990633
	1.22568	0.377695		2.79697	0.983652		0.789742	0.64805		0.219732	0.363915	0.385553	0.283022	0.345909	0.604129
	0.552317	1.0294		0.201721	0.430193		0.417895	0.676685		0.110492	0.304804	0.187367	0.0758216	0.146996	0.114533
	0.201155	1.03497		0.573143	1.57662		0.753969	3.36233		0.205974	0.278101	0.304746	0.0975699	0.0756888	0.156867
	0.521261	2.44366		0.603526	1.29316		0.949641	3.05717		0.0705013	0.16409	0.229493	0.148912	0.193755	0.0902579
	0.35242	0.614568		0.728789	1.55928		0.38444	0.504624		0.357448	0.416178	0.715274	0.110301	0.0594361	0.142542
	0.54095	0.524735		0.416432	3.21707		0.61249	3.32265		0.304226	0.357141	0.115539	0.290753	0.456771	0.215249
	0.186018	0.196487		0.240387	0.247977		0.571594	0.0753314		0.174889	0.121634	0.18852	0.0394985	0.24092	0.0989417
	0.371851	0.627954		0.0737654	1.46998		0.0856514	1.93844		0.384607	0.228499	0.249071	0.105188	0.147092	0.0467457
	0.885111	0.282591		0.232758	0.516159		0.918575	0.85521		0.0880874	0.277493	0.626748	0.112131	0.215543	0.355423
	4.13652	0.197673		2.97433	0.155845		2.58093	0.0847229		0.372555	0.107041	0.40428	0.0565134	0.0523708	0.22214
	0.186086	1.80916		0.601714	0.816008		0.794254	0.00222556		0.207539	0.227229	0.205159	0.109878	0.161008	0.162139
	1.0133	2.69794		0.219	0.915136		0.762261	0.933898		0.28604	0.384447	0.133501	0.260382	0.261398	0.213179
	1.59677	4.19417		1.63766	2.45585		2.10798	2.86127		0.0888724	0.0200482	0.0732607	0.320882	0.343491	0.174334
	0.164314	0.135842		0.182615	0.472281		0.216978	1.26414		0.228131	0.202956	0.179466	0.206317	0.113808	0.118458
	0.584732	0.114934		0.436991	0.119295		0.720015	0.616014		0.186876	0.185377	0.181362	0.0769211	0.48651	0.209618
	0.35546	1.92307		0.796003	4.83931		0.940502	6.01261		0.107054	0.182593	0.30576	0.0488915	0.123512	0.196836
	0.399551	0.782768		0.718765	3.0496		0.151545	0.176269		0.325946	0.562465	0.629741	0.172909	0.193803	0.160853
	4.17614	2.81193		3.14453	0.965987		0.22759	1.8739		0.499131	0.193299	0.405517	0.285535	0.422397	0.116433
	4.43678	0.70237		2.69806	0.497501		3.67136	1.05111		0.263391	0.304075	0.0189701	0.203969	0.0826666	0.205381
	1.50638	0.134439		0.990259	0.428889		2.56145	0.204993		0.349755	0.14286	0.273583	0.301787	0.354592	0.448181
	0.362713	0.35753		2.16517	0.329533		4.68739	0.909199		0.310724	0.385671	0.607454	0.24138	0.851126	0.390563
	0.779329	1.51549		0.860423	3.24423		0.813977	0.107402		0.26675	0.366269	0.621386	0.0912778	0.149206	0.072726
	3.20798	0.367193		3.43281	0.409757		3.25647	0.48887		0.215396	0.343977	0.092501	0.113585	0.225046	0.0749306
	1.29199	1.29161		2.43009	2.5477		2.91052	1.4741		0.518723	0.236587	0.0950125	0.305837	0.296753	0.0601389
	1.24089	2.4589		1.60029	1.31398		0.850219	3.27103		0.133498	0.278056	0.21927	0.138264	0.335938	0.23128
	0.183527	0.451073		0.284281	1.08465		3.51572	1.10399		0.359679	1	0.267427	0.153201	0.0732097	0.206076
	0.13951	0.234359		0.567899	0.690778		0.626706	0.0752233		0.198084	1	0.295556	0.32204	0.365767	0.81629
	0.339103	0.638974		1.83477	0.396141		0.680314	0.228207		0.384779	1	0.134731	0.1815	0.516181	0.00704325
	1.75163	0.386422		0.561752	0.921434		1.28843	1.56203		0.0695171	0.375341	0.187523	0.176634	0.224721	0.161526
	0.181989	2.67213		0.551454	3.78348		0.507973	1.3095		0.414109	0.360995	0.529322	0.0529805	0.0654975	0.136381
	3.89401	2.23476		4.74792	3.35434		1.62211	1.6223		0.0927894	0.19909	0.183323	0.157068	0.237508	0.171156
	0.352128	0.377569		0.40754	0.659078		0.0707322	0.104815		0.201688	0.194182	0.101455	0.578386	0.677464	0.199935
	1.12155	0.589296		1.52708	0.438568		2.98851	0.465072		0.124455	1	0.272424	0.199682	0.352949	0.0891798
	0.830733	0.643834		2.08648	1.05494		1.1462	2.96177		0.182697	0.179614	0.282052	0.206695	0.200501	0.204322
	1.26482	0.078705		1.00429	2.12826		0.430494	1.4684		0.347091	0.602229	0.432782	0.0456607	0.0773556	0.214433
	0.787169	0.281468		1.39941	0.935178		0.346118	0.596794		0.240564	0.206717	0.104849	0.222592	0.60777	0.468607
	1.15609	0.426638		2.93921	0.458275		0.756675	0.70607		0.503674	0.428545	0.197964	0.475551	0.341078	0.00167143
	0.10481	0.537937		0.719737	0.793382		0.428263	0.34103		0.12377	0.42114	0.323937	0.154662	0.135946	0.237367
	0.214907	1.98958		0.337564	2.48197		0.458992	1.46901		0.332096	0.365833	0.354773	0.358042	0.380749	0.552463
	0.285332	2.71765		0.645496	2.98016		0.458883	1.97942		0.170047	0.635198	0.343582	0.179806	0.216602	0.134988
	0.546731	0.295636		0.822153	0.639128		0.283256	0.995766		0.113937	0.429298	0.406578	0.464168	0.411127	0.200706
	1.37909	0.699419		2.49244	1.88481		2.76672	1.64884		0.42963	0.581029	0.27248	0.327718	0.472587	1
	1.63552	0.540001		0.667072	1.05315		1.1725	0.905993		0.103905	0.146779	0.0808587	0.0482152	0.128428	0.138821
	1.21148	0.325163		0.911415	0.884837		0.443261	0.615784		0.0450145	0.0200942	0.0107774	0.357291	0.319638	0.418119
	1.99611	0.133938		2.20334	1.54364		1.74564	0.797819		0.175177	0.0928548	0.0518655	0.123023	0.408775	0.130427
	0.36227	1.27441		0.551725	0.56401		0.355726	1.51437		0.528659	0.744536	0.419371	0.100649	0.525939	0.767133
	3.04949	0.738548		3.3517	0.353387		3.22101	0.222245		0.246821	0.346008	0.136722	0.105068	0.0531099	0.13326
	0.16888	0.172627		0.714731	3.37183		2.68014	2.65654		0.296845	0.189176	0.18756	0.348372	0.397705	0.140324
	0.284796	0.968467		1.62908	2.13945		1.84566	2.21995		0.0803977	0.330447	0.179402	0.0449328	0.43054	0.479149
	0.829162	0.560867		1.87031	4.33849		2.69648	2.00813		0.313374	0.62278	0.383454	0.180713	0.34566	0.672249
	1.14269	0.547419		1.39329	1.22081		2.28079	0.125057		0.0445367	0.105311	0.141238	0.412672	0.517196	0.913817
	0.238892	1.32295		0.985673	5.24534		1.32771	2.09143		0.259494	0.346254	0.33466	0.444482	0.601145	0.653103
	0.197267	1.5048		2.14165	2.18723		0.426642	4.08417		0.184157	0.363586	0.201501	0.328652	0.860646	0.460599
	1.72884	0.547063		2.25704	1.4397		3.51167	0.335414		0.1275	0.267508	0.084659	0.201458	0.483508	0.496192
	0.757641	0.119211		0.832158	0.661295		1.67519	1.47027		0.178252	0.195105	0.338546	0.284016	1	0.537558
	0.143538	0.098758		0.929506	1.52579		2.28757	0.654776		0.0895705	0.0912802	0.0264297	0.319677	0.373886	1
	0.432948	0.313775		0.311263	0.121879		0.324326	0.529948		0.407302	0.448013	0.0916761	0.0755577	1	0.499068
	0.136551	0.382222		2.1026	1.57946		0.679112	2.27494		0.344382	0.278392	0.105185	0.178786	0.177119	0.298558
	1.50948	0.41142		3.69825	0.888155		2.79897	5.08211		0.153812	0.568785	0.182734	0.160561	0.389415	0.531967
	0.615727	1.73736		0.793077	1.06986		0.770718	1.71658		0.617571	0.720695	0.288927	0.0755226	0.112224	0.338643
	0.490069	0.940937		4.03565	1.10068		1.75762	3.37701		0.353234	0.487874	0.759644	0.177146	0.165267	0.288436
	4.09049	0.388556		10.0706	2.87307		6.02404	2.95128		0.170302	0.455889	0.101717	0.0963363	0.0453358	0.117929
	0.590472	0.135638		0.336454	0.672452		3.173	0.391743		0.16305	0.417009	0.141528	0.211315	0.39004	0.23258
	0.100931	0.723725		1.13381	0.632767		0.805619	0.912529		0.17241	0.231467	0.29688	0.145649	0.26167	0.12589
	2.22849	0.783566		0.64876	0.620608		1.49974	1.60885		0.224784	1	0.598837	0.157078	0.255512	0.0645209
	1.96416	1.06626		1.37125	3.95229		2.62721	0.505583		0.495479	0.409188	0.0817492	0.188872	0.220882	1
	3.99345	0.345832		0.566068	1.26808		1.22612	1.33707		0.281954	0.230708	0.0241192	0.156228	0.429774	0.273448
	3.08922	0.114783		1.20599	1.00644		2.20814	4.07261		0.293638	0.0625022	0.126663	0.438424	0.451186	0.721262
	1.08714	3.43751		6.36186	3.60812		4.25252	3.54288		0.636562	0.244104	0.628684	0.0523653	0.540306	0.457407
	1.90881	0.452778		1.31062	0.89572		1.95635	0.512639		0.293131	0.19916	0.11336	0.788991	1	1
	0.365491	1.97739		0.810037	1.12683		0.285745	1.61863		0.370684	0.156758	0.10975	0.152067	1	0.394547
	5.37516	0.715047		0.745226	0.601527		2.39257	3.18317		0.839276	0.399893	0.116783	0.498828	0.238131	0.349108
	4.96515	0.885502		7.39966	1.85349		6.04927	0.837996		0.819113	0.33901	0.466303	0.0911818	0.0569654	0.175913
	1.6841	3.91498		2.51046	0.165087		1.25513	2.37014		0.130611	0.221514	0.065544	0.316684	0.326509	0.12439
	0.656336	2.39605		0.221237	0.753829		0.996495	2.50124		0.304004	0.42587	0.371265	0.185601	0.00925092	0.176117
	3.43464	2.76915		2.73869	2.96741		1.95199	1.88678		0.246706	0.100994	0.24229	0.200087	0.0800982	0.284223
	1.86168	0.642465		3.40353	2.04425		1.55948	0.970075		0.234565	0.336393	0.350683	0.344635	0.466263	0.152125
	0.414258	0.55966		0.440012	1.2861		0.0859549	1.41542		0.0633025	0.133081	0.0264059	0.0904291	0.268319	0.113308
	0.0740539	1.25099		0.456658	1.02496		0.477357	0.487166		0.338784	0.186216	0.192044	0.206788	0.146082	0.153022
	2.96418	0.844522		6.12873	0.125626		3.90325	0.382567		0.217767	0.499629	0.416378	0.429905	0.309366	0.137271
	5.4071	3.78426		13.9093	1.70085		14.9783	2.37239		0.115662	0.390242	0.158259	0.172402	0.179878	0.579513
	2.93625	0.586393		2.14788	0.403635		3.15534	0.351286		0.157212	0.524788	0.295563	0.168742	0.0472013	0.0294858
	3.68397	0.940808		2.66365	1.72597		7.33587	0.698734		0.173183	0.116137	0.189946	0.34529	0.612174	0.39853
	2.22274	0.67714		6.97496	0.164095		2.55586	0.0809213		0.244376	0.297511	0.377993	0.0321798	0.058898	0.0391327
	0.208732	0.322011		0.907683	0.0845226		0.995013	0.516969		0.222815	0.31955	0.144404	0.51227	0.15198	0.0831001
	0.264965	1.11493		3.53613	0.496245		0.968099	0.605258		0.0773151	0.409769	0.224854	0.121424	0.0535059	0.553128
	0.272184	0.821339		0.82963	0.469197		2.35272	1.6939		0.392263	0.451463	0.430659	0.323432	0.262331	0.359761
	0.340264	0.375921		5.71634	0.136487		8.51882	0.336332		0.209067	0.224727	0.243902	0.0171509	0.0100801	0.0533764
	0.824811	0.337099		0.650274	1.26274		2.00632	0.702211		0.0527379	0.385889	0.487454	0.194691	0.160682	0.260008
	0.069776	0.334645		0.462501	0.376931		0.236417	0.212355		0.0709083	0.084426	0.17328	0.0451574	0.200354	0.0647145
	0.0871962	1.05187		0.703244	2.78742		0.418448	1.15728		0.50924	0.141745	0.0932022	0.298716	0.387702	0.412657
	0.190557	0.401869		0.716136	1.09075		0.79697	1.21696		0.379049	0.677696	0.25453	0.061939	0.177292	0.0360706
	0.758979	0.186599		0.933839	0.50888		0.229733	0.388268		0.498414	0.4435	0.304005	0.0624907	0.2466	0.0173858
	0.948894	0.585539		0.73878	0.642622		0.69773	1.45887		0.195062	0.455596	0.0769189	0.0590037	0.154997	0.101796
	0.612991	0.367226		1.64914	0.387923		3.38966	1.01551		0.283545	0.358626	0.288479	0.0699668	0.0750924	0.164837
	0.097157	0.089036		0.920057	0.62966		0.922783	1.22466		0.331569	0.490344	0.796559	0.187807	0.501677	0.146414
	1.30184	0.281392		0.875976	0.0244153		0.640619	0.038473		0.103582	0.275964	0.326781	0.0360284	0.558693	0.0689666
	0.0977357	1.53656		0.853457	1.09868		0.514721	1.3489		0.418552	0.517473	0.260784	0.196377	0.010212	0.0455803
	0.849625	0.374748		0.387077	0.0864849		0.510281	1.51161		0.289366	0.375935	0.193784	0.30191	0.133214	0.234364
	1.94708	2.17074		2.75578	1.10755		2.11629	1.78313		0.641867	0.320919	0.344184	0.119986	0.0209183	0.315372
	4.76395	0.964581		7.10474	0.676597		6.79633	2.2838		0.363201	0.536777	0.432153	0.301426	0.275678	0.162793
	0.578986	1.97041		1.23846	1.0377		0.0494996	0.838529		0.26625	0.320238	0.271691	0.0326837	0.0201599	0.0800233
	0.598619	0.057727		1.54154	0.321505		4.31951	1.15028		0.413888	0.438658	0.0662128	0.184712	0.0715369	0.330978
	1.73013	1.46565		0.181625	3.29525		0.508531	0.944682		0.40527	0.947017	0.893266	0.158079	0.263806	0.243407
	0.564065	1.40972		0.562478	2.06589		0.684344	0.5353		0.350107	0.202888	0.416112	0.255721	0.795323	0.592169
	1.27169	0.0457085		0.754937	1.26064		2.38412	0.526411		0.813984	0.531448	0.573877	0.113881	0.491753	0.15422
	0.635774	1.14044		1.39594	1.05237		2.25774	1.78243		0.203844	0.138616	0.635504	0.107061	0.348314	0.657997
	1.898	0.80576		1.72657	1.54976		0.33856	0.825115		1	0.331928	0.636246	0.433607	0.259611	0.502578
	0.666197	0.758802		0.420172	2.55604		0.443893	2.79114		0.0790999	0.105292	0.103883	0.203812	0.784303	0.36293
	1.433	0.623548		0.850642	1.92703		0.870588	1.21441		0.384925	0.722813	1	0.512993	0.576432	0.515489
	0.128066	0.204928		2.87088	0.582436		2.66738	0.421298		0.245092	0.071495	0.329492	0.0803208	0.216452	0.318491
	0.233909	1.01373		0.276684	1.63464		0.318969	1.75395		0.0695172	0.77503	0.254368	0.0268297	0.415994	0.446881
	1.32546	0.391711		0.575451	0.437739		1.96955	0.819816		0.300285	0.585492	0.201411	0.107311	0.130732	0.23532
	0.405753	0.365487		0.828517	0.295266		0.384379	0.886847		0.389397	0.101435	0.528621	0.168644	0.087485	0.216058
	1.24007	1.2519		0.0825367	1.6475		1.49721	2.5433		0.22768	0.366845	0.25453	0.107233	0.250415	0.959731
	2.10356	2.32215		1.55606	1.4547		2.52522	6.81741		0.151683	0.00980849	0.221506	0.157953	0.249189	0.435193
	0.826854	0.157116		0.24624	1.71842		1.59789	0.0642225		0.126651	0.116628	0.243513	0.0733494	0.0484171	0.257492
	1.08072	2.37831		2.38892	4.74324		2.32484	1.15922		0.1009	0.0426481	0.170785	0.0268315	0.357635	0.162057
	2.45612	0.557		1.28162	1.9408		0.820236	2.51907		0.093427	0.16461	0.0763733	0.0394566	0.0621968	0.0345996
	1.38804	0.427219		1.69454	0.152308		0.942189	4.18377		0.0800601	0.0530129	0.0287211	0.0862809	0.143139	0.201452
	0.569352	0.528343		0.875629	4.63912		2.17349	5.79497		0.16944	0.197689	0.107091	0.0438277	0.0102761	0.00318667
	0.304856	0.299559		2.93942	1.33217		2.99098	1.01093		1	0.198259	0.912612	0.0385407	0.244869	0.524896
	0.710215	0.48459		1.45642	0.3761		2.68942	0.928302		0.205659	0.512016	0.536683	0.0853314	0.286205	0.209824
	1.93657	0.46096		0.412023	0.678673		0.920866	0.607001		0.0900835	0.19311	0.268056	0.423285	0.266265	0.391927
	0.379554	0.31342		2.02463	0.740482		1.49416	0.660478		0.683907	0.129105	0.306862	0.116492	0.184161	0.174483
	0.690928	0.57256		3.55211	1.51026		1.16526	1.19339		0.290039	0.503345	0.484702	0.170478	0.384481	0.462571
	1.21231	1.43464		0.58314	2.2039		2.46886	0.939509		0.493457	0.820474	0.368575	0.198685	0.26244	0.084416
	0.753036	0.848063		0.332771	1.37421		0.157878	0.285624		0.239818	0.091442	0.431347	0.0790559	0.111819	0.0739994
	0.301314	0.645132		0.339525	1.024		3.1332	1.64354		0.660803	0.177993	0.154674	0.299879	0.489141	0.136609
	0.0481349	5.82382		0.737749	2.54126		1.20953	1.72559		0.569188	0.381173	0.727129	0.162215	0.137245	0.0656984
	1.39497	0.322993		2.28109	0.491961		1.37097	1.00186		0.0950162	0.195776	0.4846	0.224485	0.195538	0.108963
	1.39195	0.369023		0.760166	0.343033		1.34348	0.65395		0.267204	0.693565	0.691068	0.237663	0.13408	0.222049
	1.68217	1.13906		2.65926	1.97642		1.73206	1.22589		0.435763	1	1	0.327263	0.323407	0.124701
	0.389013	0.971184		2.1151	0.771497		1.22285	1.79088		0.144881	0.35425	0.195313	0.2173	0.230014	0.122558
	0.224982	2.8912		0.633044	1.50688		1.35684	4.88775		0.0419	0.220184	0.180488	0.149306	0.134359	0.119515
	0.179795	1.58625		2.22738	0.798659		0.519753	0.595201		0.146806	0.522632	0.765491	0.31616	0.19912	0.164928
	0.627693	1.98468		4.22145	2.05965		2.62529	0.995922		0.0193868	0.400218	0.0654489	0.175997	0.254884	0.260432
	1.19648	0.258935		0.458893	1.34673		3.8602	0.446778		0.740429	0.411742	0.597384	0.184556	0.12595	0.0635595
	1.21038	3.22764		0.836797	1.71231		0.946651	0.601274		0.104715	0.0859752	0.382853	0.0375085	0.142647	0.0387549
	0.496728	2.98987		0.127247	2.06109		0.271706	2.24591		0.107335	0.630285	0.0917164	0.284202	0.497868	0.349393
	1.06939	2.18308		2.13863	2.82014		3.40572	4.03203		0.323677	0.128698	0.554728	0.71721	0.479736	0.459975
	0.807429	0.771555		4.56035	0.662592		3.74232	0.652724		0.103864	0.194584	0.231038	0.117591	0.139079	0.131261
	0.524745	1.30161		5.24445	0.479497		2.12693	0.332329		0.151604	0.663905	0.112409	0.0328752	0.0593554	0.0138517
	0.842804	0.878868		2.10276	0.44644		2.28057	2.51842		0.253328	0.408534	0.485544	0.50868	0.228953	0.296893
	0.517323	2.6675		0.496309	0.68815		0.647544	0.0462787		0.125832	0.241675	0.140972	0.0779042	0.0824754	0.276343
	1.67477	0.793102		2.67581	1.46679		2.43693	0.22606		0.129344	0.245717	0.398211	0.172914	0.0810441	0.211097
	0.432118	0.488921		0.730622	1.15902		0.67403	3.71541		0.268784	0.41651	0.433488	0.151269	0.37022	0.0747249
	0.722314	0.153138		1.25171	0.245172		0.756409	0.0496637		0.329718	0.574148	0.870853	0.67036	0.122491	0.505538
	0.594876	3.0006		2.18219	1.28182		2.29117	0.9851		0.256957	0.435939	0.335289	0.496687	0.243816	0.0614914
	0.224789	0.286216		1.79748	0.389948		1.96396	0.123498		0.387609	0.909188	1	0.341096	0.449565	0.201729
	0.127421	0.711469		0.225311	1.30374		1.79622	0.721344		0.444583	0.896229	0.575383	0.582627	0.251958	0.0460189
	0.764116	1.60337		0.919473	1.75226		0.541781	3.42515		1	0.336555	0.0663645	0.123487	0.272166	0.319208
		0.6814			0.464653			0.6169		1	0.342844	0.173001	0.105672	0.108136	0.102738
		0.299959			0.624511			4.0614					0.0621296	0.0435466	0.0263058
		0.395619			1.57188			1.4437					0.0320499	0.0385454	0.109474
		1.92624			1.00787			0.424836					0.2151	0.361715	0.203887
		0.335576			1.14535			1.54941					0.444766	0.12289	0.101612
		3.63588			0.182338			0.40413					0.142656	0.460465	0.192021
		0.691397			1.84491			0.392764					0.134377	0.0116961	0.0823374
		0.221273			1.33782			3.81763					0.0685075	0.14941	0.076987
		0.874255			0.824729			0.614331					0.19971	0.0405126	0.120667
		0.385272			0.329361			0.759962					0.154456	0.157802	0.151871
		0.895305			1.13859			1.76102					0.131012	0.149265	0.38752
		2.62264			2.85015			5.5149					0.14819	0.534958	0.313494
		2.88237			0.882019			2.53866					0.253293	0.263832	0.540772
		1.09909			0.886907			1.6834					0.262696	0.683855	0.6567
		0.254184			1.92468			2.04012					0.126716	0.116072	0.250386
		0.597277			1.20989			0.286128					0.0412396	0.224572	0.0651918
		1.37301			0.89677			0.759006					0.164842	0.261558	0.147387
		1.09133			0.957653			2.70018					0.13515	0.086038	0.0625756
		0.344338			0.452805			0.754201					0.0330267	0.0274873	0.0554478
		0.669593			0.362945			0.231019					0.0730621	0.143402	0.242559
		0.447627			1.3831			1.6652					0.266836	0.0933701	0.0925808
		0.145628			1.02586			0.920896					0.158989	0.413325	0.399187
		1.14508			3.39776			1.61103					0.0218266	0.287146	0.251994
		0.611854			1.2831			2.01838					0.462034	0.237181	0.144782
		0.486202			2.25583			3.02694					0.0731496	0.0730695	0.0415475
													0.0311919	0.13004	0.149833
