# Supplementary material for: Suppressed prefrontal neuronal firing variability and impaired social representation in IRSp53-mutant mice
Source: eLife. 2022 Nov 1;11:e74998. doi: 10.7554/eLife.74998 (PMC9662818; doi:10.7554/eLife.74998)
Supplement: Figure 5—source data 1. — The excel file contains the numerical data used to generate Figure 5A–G. [file elife-74998-fig5-data1.xlsx]

## Sheet: Fig 5
	Fig 5A								Fig 5B	Mean FR		Fig 5C	FR Range		Fig 5D	Fraction of normalized FR																				Fig 5E	Sigma		Fig 5F					Fig 5G	Sigma
	Time (s)	WT neuron #224	KO neuron #210		WT neuron #224				WT	KO		WT	KO		WT										KO											WT	KO		WT		KO			WT			KO
		Inst. FR (Hz)	Inst. FR (Hz)		Mean FR	Sigma	Max FR		0.554074	0.79713		8	7.66667		0 - 0.1	0.1 - 0.2	0.2 - 0.3	0.3 - 0.4	0.4 - 0.5	0.5 - 0.6	0.6 - 0.7	0.7 - 0.8	0.8 - 0.9	0.9 - 1.0	0 - 0.1	0.1 - 0.2	0.2 - 0.3	0.3 - 0.4	0.4 - 0.5	0.5 - 0.6	0.6 - 0.7	0.7 - 0.8	0.8 - 0.9	0.9 - 1.0		0.830824	1.14696		log(Mean FR)	log(Sigma)	log(Mean FR)	log(Sigma)		E-E	First S-O	Second S-O	E-E	First S-O	Second S-O
	1	1.5	1.5		3.1539	3.2447	19		14.9838	0.903148		23	7.66667		0.768095	0.133333	0.0671429	0.0133333	0.00952381	0.00619048	0.000952381	0.00047619	0.00047619	0.00047619	0.67381	0.113333	0.0809524	0.0685714	0.0257143	0.0209524	0.0114286	0.00285714	0.00142857	0.000952381		3.29411	1.10268		-0.256432	-0.0804911	-0.098471	0.059548		1.3035	0.90347	1.0587	1.50045	1.56901	0.973219
	2	1	1.33333						3.80806	4.34583		14.6667	17.3333		0.00714286	0.0228571	0.0642857	0.195714	0.316667	0.234762	0.119048	0.0328571	0.00666667	0	0.64	0.145714	0.0857143	0.0809524	0.0209524	0.0128571	0.0104762	0.00238095	0.00047619	0.00047619		3.01243	2.7118		1.17562	0.517739	-0.044241	0.0424479		5.1422	4.4382	4.14141	1.23833	1.50412	1.47179
	3	1	2.33333		KO neuron #210				4.91528	1.72454		20	7		0.377619	0.172381	0.148095	0.087619	0.0638095	0.0909524	0.032381	0.0180952	0.00666667	0.00238095	0.184762	0.195714	0.229048	0.200952	0.119048	0.0547619	0.01	0.00285714	0.00142857	0.00142857		4.34427	1.63057		0.580703	0.478918	0.638073	0.433258		3.47982	2.04514	2.72566	2.07825	2.90063	3.31219
	4	0	2.33333		Mean FR	Sigma	Max FR		2.90926	1.71287		15.3333	10		0.335238	0.199048	0.110476	0.0790476	0.0809524	0.0766667	0.0628571	0.0419048	0.0109524	0.00285714	0.517619	0.218095	0.138571	0.0909524	0.0166667	0.0119048	0.00428571	0.000952381	0.00047619	0.00047619		2.80559	1.83965		0.691548	0.637916	0.236673	0.21234		5.05346	3.20268	2.22976	2.27619	1.9244	1.82213
	5	0	2.66667		3.4067	1.9318	12.3333		4.1475	2.5988		14.6667	11.3333		0.460952	0.181429	0.110952	0.122857	0.0652381	0.0319048	0.0204762	0.00285714	0.00142857	0.00190476	0.384762	0.196667	0.186667	0.0671429	0.0595238	0.0533333	0.0257143	0.0142857	0.00809524	0.00380952		3.33116	1.84805		0.463782	0.448025	0.233724	0.264736		3.19487	3.2848	2.86961	2.33625	2.40348	2.11237
	6	0	2.66667						0.953148	1.39065		8.66667	10.3333		0.292857	0.153333	0.164286	0.112857	0.0938095	0.0952381	0.0433333	0.0285714	0.00952381	0.00619048	0.251429	0.215238	0.22619	0.138095	0.082381	0.0566667	0.0161905	0.0104762	0.00238095	0.000952381		1.39733	1.56569		0.617786	0.522595	0.414772	0.266714		3.50205	4.50943	4.00494	2.66276	2.52365	2.37977
	7	0	2						0.863889	0.943981		8	6		0.595238	0.186667	0.0690476	0.0728571	0.0247619	0.0290476	0.0109524	0.00761905	0.00285714	0.000952381	0.633333	0.194762	0.0785714	0.0504762	0.0228571	0.0119048	0.00428571	0.00333333	0	0.00047619		1.2603	1.10749		-0.0208396	0.145299	0.143217	0.194707		2.29437	1.12345	1.47378	1.94981	2.46416	1.81511
	8	0	1.66667						3.56917	9.29898		12	19.6667		0.686667	0.128095	0.0652381	0.0495238	0.03	0.0195238	0.0138095	0.0047619	0.000952381	0.00142857	0.52381	0.179048	0.127143	0.0742857	0.0261905	0.0371429	0.02	0.00666667	0.00333333	0.00238095		2.09723	3.28535		-0.0635421	0.100472	-0.0250365	0.0443409		2.08279	0.923499	1.07396	1.26219	1.64336	1.49224
	9	0	0.666667						0.621481	0.789907		8.66667	9.5		0.0790476	0.248571	0.210476	0.197619	0.106667	0.0890476	0.0419048	0.0157143	0.00904762	0.00190476	0.0285714	0.0742857	0.165714	0.188571	0.247143	0.189048	0.0704762	0.0290476	0.0047619	0.00238095		1.17677	1.28876		0.552567	0.321645	0.968435	0.516582		3.3652	2.35413	2.16461	4.36504	3.91905	4.31118
	10	0	1						1.19296	9.55074		7.33333	23.6667		0.798571	0.111905	0.0304762	0.027619	0.01	0.00857143	0.00380952	0.00428571	0.00333333	0.00142857	0.754286	0.114286	0.072381	0.0271429	0.01	0.00904762	0.0047619	0.00380952	0.00238095	0.00190476		1.46907	5.08455		-0.206572	0.0706899	-0.102424	0.110172		0.917917	1.72911	1.36071	2.18421	0.622327	1.30365
	11	0.333333	2						2.17602	1.32269		9.66667	9.33333		0.484286	0.165714	0.0971429	0.0542857	0.0680952	0.0542857	0.0342857	0.0280952	0.0114286	0.00238095	0.227143	0.0828571	0.107143	0.131905	0.139048	0.14381	0.103333	0.0461905	0.0147619	0.00380952		2.33094	1.37087		0.076627	0.167042	0.980037	0.706253		1.13986	1.78115	2.07908	4.99575	5.18341	4.86185
	12	0.666667	2.66667						0.706852	6.95148		5.33333	16		0.511429	0.119048	0.08	0.0833333	0.0614286	0.0561905	0.0471429	0.0266667	0.00904762	0.00571429	0.536667	0.218571	0.130952	0.0609524	0.0271429	0.0152381	0.0052381	0.00238095	0.00190476	0.000952381		0.976496	3.13244		0.337663	0.367531	0.121456	0.136996		2.79487	1.85383	1.27674	1.60485	1.8372	1.98808
	13	1	3.33333						2.30759	4.745		8.33333	15		0.539048	0.200476	0.067619	0.0833333	0.0314286	0.0385714	0.0242857	0.00428571	0.00761905	0.00333333	0.0290476	0.102381	0.165714	0.181905	0.190476	0.15381	0.105714	0.0509524	0.0152381	0.0047619		1.66036	2.90087		-0.150672	-0.0103295	0.842077	0.495883		1.18188	1.22985	1.27807	4.36929	3.77172	3.62694
	14	0.666667	3						3.73815	3.43148		11	15		0.191429	0.200476	0.125714	0.177619	0.0947619	0.113333	0.0671429	0.0161905	0.0109524	0.00238095	0.122381	0.155238	0.224286	0.165714	0.159524	0.0947619	0.0419048	0.0252381	0.00904762	0.00190476		2.19525	2.82843		0.363159	0.220202	0.676236	0.462528		1.7199	2.18888	2.12929	3.22422	2.84326	3.71753
	15	1	2.66667						4.37222	0.623611		13.3333	9.33333		0.209048	0.154286	0.140476	0.190952	0.121905	0.0852381	0.0633333	0.0190476	0.0114286	0.00428571	0.311905	0.238571	0.175238	0.0980952	0.09	0.05	0.0195238	0.00666667	0.00666667	0.00333333		2.38348	1.14657		0.572657	0.341483	0.535482	0.451545		2.60596	2.67626	2.81169	2.93834	3.12384	3.89197
	16	0.666667	2						11.5769	2.8238		19.3333	15.6667		0.0957143	0.152381	0.186667	0.173333	0.128095	0.164286	0.0457143	0.04	0.0104762	0.00333333	0.81	0.1	0.04	0.022381	0.00952381	0.0109524	0.00333333	0.000952381	0.00238095	0.00047619		2.96307	3.27065		0.640702	0.377212	-0.205086	0.0594022		3.07697	3.22954	2.43611	0.951213	1.23384	1.90591
	17	0.666667	1.66667						2.22935	4.38157		10	15.3333		0.00666667	0.0314286	0.102857	0.258571	0.245238	0.209048	0.102381	0.0371429	0.00666667	0	0.496667	0.147143	0.105714	0.0709524	0.087619	0.0509524	0.02	0.0157143	0.00238095	0.00285714		1.57062	2.90522		1.06359	0.471742	0.450833	0.514634		4.18256	4.34686	3.87432	2.98611	4.15404	3.50719
	18	0.333333	1.33333						0.852963	4.49009		6.33333	16.3333		0.174286	0.253333	0.30619	0.104762	0.0928571	0.0538095	0.01	0.00238095	0.000952381	0.00142857	0.17619	0.229524	0.177143	0.186667	0.100952	0.0733333	0.0380952	0.01	0.0047619	0.00333333		1.03682	3.64873		0.348179	0.19607	0.64163	0.463178		2.0303	1.94233	2.17321	3.14443	3.41267	3.80189
	19	0.666667	1						0.725278	0.663148		11.3333	5.33333		0.515714	0.204286	0.11619	0.0795238	0.0485714	0.0209524	0.00857143	0.0047619	0.000952381	0.00047619	0.297619	0.135714	0.140952	0.12381	0.129048	0.0828571	0.0466667	0.0252381	0.0119048	0.00619048		1.48732	0.917352		-0.0690698	0.0157034	0.652255	0.562142		1.31334	1.28043	1.35139	2.84021	4.19343	4.14585
	20	0.666667	0.333333						0.71537	4.13676		7.33333	20.3333		0.835714	0.0504762	0.0533333	0.0257143	0.0138095	0.0147619	0.00428571	0.00047619	0.00047619	0.000952381	0.604286	0.196667	0.0580952	0.0680952	0.02	0.0295238	0.0138095	0.0052381	0.00285714	0.00142857		1.02251	4.06743		-0.139496	0.172405	-0.178389	-0.0374638		2.20761	1.3961	1.25248	1.56143	1.29759	0.897389
	21	0.333333	0.333333						10.4299	0.563241		16.3333	7.66667		0.744286	0.10381	0.07	0.04	0.0204762	0.0133333	0.00428571	0.00047619	0.00190476	0.00142857	0.418095	0.226667	0.12619	0.0766667	0.0590476	0.0380952	0.0338095	0.0114286	0.00619048	0.00380952		2.36072	0.900249		-0.145469	0.00966692	0.61666	0.60932		1.1571	1.29994	1.51212	5.0373	5.71573	3.22014
	22	0	0.666667						0.511019	1.50824		6.33333	19.3333		0.00666667	0.047619	0.163333	0.285238	0.239048	0.19	0.0595238	0.00714286	0.00142857	0	0.702857	0.159524	0.0785714	0.0380952	0.00904762	0.00238095	0.0047619	0.00190476	0.00047619	0.00238095		0.91656	2.63289		1.01828	0.373045	-0.249306	-0.0456375		3.46036	3.86211	3.49738	1.00035	1.31168	1.36788
	23	0	1.66667						0.589537	0.870741		7.66667	14.6667		0.734762	0.112381	0.0633333	0.042381	0.0219048	0.0104762	0.00952381	0.00333333	0.00142857	0.00047619	0.781429	0.103333	0.0471429	0.0319048	0.0104762	0.0104762	0.00904762	0.0047619	0.00047619	0.000952381		1.00695	1.39353		-0.291563	-0.0378389	0.178471	0.420432		1.43229	0.961187	1.00007	2.91769	2.53768	4.28673
	24	0	3.33333						2.8362	1.1462		15	16		0.778571	0.0766667	0.05	0.0447619	0.0204762	0.0114286	0.0128571	0.00142857	0.00285714	0.000952381	0.818571	0.114762	0.0428571	0.0119048	0.0047619	0.00238095	0.00380952	0	0.00047619	0.00047619		2.81476	1.90698		-0.229489	0.00300843	-0.0601111	0.144117		1.04203	1.26939	1.32939	1.96521	2.35012	1.41075
	25	0	3						9.58481	2.30806		18.6667	14.6667		0.432857	0.209048	0.150476	0.0747619	0.0609524	0.0352381	0.0180952	0.0109524	0.0047619	0.00285714	0.73381	0.162381	0.0519048	0.022381	0.0119048	0.00761905	0.00333333	0.00333333	0.00190476	0.00142857		3.42383	2.181		0.452737	0.449441	0.0592618	0.280347		3.94568	3.46676	3.23191	2.58816	2.37309	2.55759
	26	0	3						3.66528	1.94009		13.3333	11.3333		0.107143	0.0490476	0.13381	0.188571	0.16381	0.17619	0.100952	0.0566667	0.0185714	0.0052381	0.48	0.254762	0.112381	0.0561905	0.0314286	0.0290476	0.0209524	0.0104762	0.00380952	0.000952381		2.95107	1.87247		0.981584	0.534512	0.363246	0.338656		4.33776	4.3868	4.34171	2.20519	3.05198	2.73684
	27	0.333333	1.66667						8.54593	0.886574		21	11		0.278095	0.142857	0.155238	0.145238	0.0904762	0.102381	0.042381	0.0338095	0.00809524	0.00142857	0.415238	0.239524	0.18381	0.0780952	0.0280952	0.0266667	0.0119048	0.01	0.0052381	0.00142857		3.48003	1.32572		0.564107	0.469979	0.287822	0.272415		2.93326	3.59534	3.41993	2.54085	2.93592	1.61824
	28	0.666667	1.66667						12.5477	0.54		26	7.66667		0.0480952	0.17	0.204762	0.214762	0.189524	0.104286	0.0461905	0.017619	0.00333333	0.00142857	0.77619	0.118571	0.0552381	0.0266667	0.00809524	0.00714286	0.00380952	0.00190476	0.00190476	0.00047619		4.13731	0.928471		0.931759	0.541582	-0.052285	0.122453		4.25554	5.17763	5.52175	1.67809	2.25557	1.18354
	29	0.666667	1.66667						2.32065	5.03648		9.66667	25.6667		0.0128571	0.0309524	0.0585714	0.133333	0.245238	0.290952	0.148095	0.0571429	0.0190476	0.00380952	0.78381	0.0980952	0.052381	0.0419048	0.00904762	0.00714286	0.0047619	0.00142857	0.00047619	0.000952381		1.73458	4.52521		1.09856	0.616718	-0.267606	-0.0322318		5.76944	4.92442	4.89472	0.893227	1.59648	1.21779
	30	0.666667	1.33333						4.13556	0.760648		13.6667	6.66667		0.177619	0.262381	0.236667	0.156667	0.0733333	0.0438095	0.0328571	0.0109524	0.00333333	0.00238095	0.267619	0.32619	0.198095	0.0638095	0.0628571	0.0371429	0.0214286	0.0128571	0.00809524	0.00190476		2.25304	0.884685		0.365609	0.239195	0.702127	0.655639		2.11003	2.40308	1.91289	4.72842	6.34323	4.01573
	31	0.333333	1						4.98704	0.6925		12	4.66667		0.0890476	0.18619	0.221429	0.200952	0.171429	0.0747619	0.0357143	0.0114286	0.00666667	0.00238095	0.664762	0.15	0.0471429	0.0385714	0.0328571	0.0309524	0.022381	0.00857143	0.00285714	0.00190476		2.19983	0.689593		0.616534	0.35277	-0.118816	-0.0532115		3.19524	2.5638	2.37947	1.07229	1.53386	0.993451
	32	0.333333	0.333333						0.706296	0.936296		7.66667	12		0.0171429	0.0990476	0.12	0.221429	0.156667	0.186667	0.11	0.052381	0.0319048	0.0047619	0.460952	0.21619	0.182381	0.0528571	0.0361905	0.0319048	0.0052381	0.0104762	0.00142857	0.00238095		1.26567	1.82548		0.697843	0.342389	-0.15958	-0.161407		3.04266	3.05255	2.7965	1.1975	0.96161	0.854283
	33	0	0.666667						1.20204	0.881389		5	8.33333		0.788095	0.08	0.0342857	0.0438095	0.0142857	0.01	0.017619	0.00428571	0.0052381	0.00238095	0.784762	0.097619	0.0433333	0.0285714	0.0128571	0.0147619	0.01	0.00285714	0.00380952	0.00142857		0.923557	1.28704		-0.151013	0.102319	-0.0285867	0.261376		1.3813	1.53109	1.72725	3.0647	2.63846	1.50996
	34	0.333333	0.666667						0.89213	2.82083		8	13.6667		0.347619	0.109048	0.223333	0.0933333	0.145714	0.0619048	0.0104762	0.00619048	0.00190476	0.00047619	0.696667	0.138571	0.0614286	0.0533333	0.0171429	0.022381	0.0052381	0.00428571	0.00047619	0.00047619		1.18069	2.43844		0.0799178	-0.0345363	-0.0548324	0.109591		1.28893	1.26528	1.16746	1.76773	1.92405	1.33916
	35	0.666667	0.333333						1.02611	1.92028		10.6667	8.66667		0.660476	0.148571	0.092381	0.0457143	0.0257143	0.0166667	0.00571429	0.00238095	0.00047619	0.00190476	0.334762	0.272857	0.168095	0.0990476	0.0552381	0.0295238	0.0242857	0.0104762	0.00380952	0.00190476		1.76152	1.54427		-0.049572	0.0721361	0.450377	0.387113		0.599585	1.61739	1.61358	3.50298	3.41944	1.70539
	36	0.666667	0.666667						0.805093	5.29926		9.33333	15.6667		0.698095	0.115238	0.0547619	0.0438095	0.0252381	0.0309524	0.017619	0.00761905	0.00380952	0.00285714	0.355238	0.235238	0.175238	0.118095	0.0638095	0.0366667	0.00904762	0.00428571	0.00190476	0.00047619		1.44358	2.67788		0.0111944	0.245888	0.283364	0.188723		1.80191	2.48509	1.84053	2.38023	1.5915	2.02294
	37	0.333333	0.666667						0.757315	1.46583		8	8.66667		0.739048	0.120952	0.0609524	0.0280952	0.0152381	0.0152381	0.0109524	0.00428571	0.00428571	0.000952381	0.067619	0.156667	0.218095	0.200952	0.19381	0.105714	0.0333333	0.0171429	0.0047619	0.00190476		1.22317	1.52576		-0.0941542	0.159441	0.724215	0.427791		2.48818	2.15776	1.6291	3.07267	3.74112	3.8083
	38	0	1.33333						0.708148	0.610093		7.33333	6.66667		0.741905	0.10619	0.0680952	0.0342857	0.0180952	0.0133333	0.0104762	0.00380952	0.00190476	0.00190476	0.501429	0.238095	0.117619	0.0509524	0.0538095	0.0190476	0.0104762	0.00380952	0.00380952	0.000952381		1.06347	0.744357		-0.120724	0.0874873	0.166085	0.183487		0.697671	1.97824	1.47933	1.11613	2.02981	2.10312
	39	0.333333	1						2.80398	0.524167		10	5		0.685714	0.119048	0.082381	0.0528571	0.0295238	0.0171429	0.0052381	0.00380952	0.00285714	0.00142857	0.746667	0.171905	0.0514286	0.0147619	0.00238095	0.00809524	0.00047619	0.00285714	0.000952381	0.00047619		1.85287	0.822537		-0.149876	0.0267266	-0.214604	-0.128219		1.03757	1.67276	1.46443	0.698944	0.867591	1.38389
	40	0.333333	1						2.98343	2.79343		14.3333	13		0.210476	0.247143	0.200952	0.183333	0.08	0.0485714	0.0204762	0.00666667	0.00142857	0.000952381	0.61619	0.0847619	0.121905	0.0519048	0.0652381	0.0409524	0.00857143	0.00571429	0.00428571	0.00047619		2.20259	2.16617		0.447775	0.267845	-0.280531	-0.0848447		2.51476	2.34276	2.75604	0.427379	0.718275	1.38809
	41	0.666667	0.666667						7.27231	7.78278		22	25		0.265238	0.249524	0.17	0.159524	0.0766667	0.042381	0.0242857	0.00714286	0.00380952	0.00142857	0.308095	0.242857	0.208095	0.12	0.0652381	0.0309524	0.0114286	0.00809524	0.00333333	0.00190476		4.42433	5.43529		0.474715	0.342934	0.446137	0.335693		3.23033	3.06909	2.61687	2.3106	2.28534	2.9593
	42	0.333333	0.666667						1.58157	2.22611		10.5	12.6667		0.132857	0.224762	0.179524	0.168571	0.107143	0.0852381	0.0585714	0.0285714	0.0109524	0.00380952	0.17619	0.151905	0.15381	0.168095	0.148095	0.100476	0.0580952	0.0271429	0.00952381	0.00666667		1.77698	1.86563		0.861673	0.645847	0.891135	0.735223		6.02041	5.17531	4.52345	5.65001	3.71916	5.38042
	43	0.333333	1						0.958519	2.08648		6	15		0.538095	0.179048	0.116667	0.0757143	0.0366667	0.0271429	0.0171429	0.00571429	0.00190476	0.00190476	0.33381	0.358571	0.169048	0.0680952	0.0209524	0.0304762	0.01	0.00761905	0.00047619	0.000952381		0.914244	2.72842		0.19909	0.249682	0.347547	0.270827		2.76822	1.75094	2.14225	1.77515	3.16161	2.16232
	44	0.333333	1.33333						5.39685	3.16824		19.3333	12		0.588095	0.188095	0.0995238	0.0266667	0.0252381	0.0338095	0.0195238	0.012381	0.00380952	0.00285714	0.655238	0.112381	0.087619	0.0461905	0.0390476	0.0319048	0.0166667	0.00809524	0.00190476	0.000952381		3.27283	2.44021		-0.0183995	-0.0389378	0.319415	0.435911		1.34864	1.1662	1.43958	1.15621	3.67341	2.45648
	45	0.333333	1						8.01102	4.68593		23.6667	20		0.120476	0.209524	0.209524	0.166667	0.127619	0.0971429	0.0447619	0.017619	0.00571429	0.000952381	0.314286	0.229048	0.212381	0.097619	0.0466667	0.0380952	0.0333333	0.0185714	0.00809524	0.00190476		4.52998	3.46293		0.73214	0.514923	0.500818	0.387428		4.71823	3.56133	3.69387	2.65127	2.19634	2.53719
	46	0.333333	0.666667						1.2713	0.5375		15.6667	6.33333		0.128571	0.194762	0.172381	0.167619	0.148571	0.0928571	0.0657143	0.0209524	0.00714286	0.00142857	0.307619	0.235714	0.201429	0.104762	0.0719048	0.0457143	0.0233333	0.00666667	0.00142857	0.00142857		2.39581	0.841161		0.903688	0.656096	0.670795	0.539444		5.43722	5.74725	5.05738	5.16359	3.38417	3.18271
	47	0	0.666667						3.11009	1.7737		26	7.33333		0.760952	0.0966667	0.0595238	0.0252381	0.0247619	0.0152381	0.00857143	0.00714286	0.000952381	0.000952381	0.661905	0.204286	0.062381	0.0319048	0.0142857	0.01	0.00666667	0.0052381	0.00190476	0.00142857		5	1.46612		0.104247	0.379452	-0.269622	-0.0751209		2.37347	2.03164	3.82856	0.831759	1.47778	1.33953
	48	0	1						8.07417	3.01176		26	13.3333		0.700476	0.0938095	0.0657143	0.0385714	0.0338095	0.03	0.0180952	0.0114286	0.0052381	0.00285714	0.352857	0.169048	0.148095	0.127143	0.0852381	0.067619	0.0247619	0.0152381	0.00809524	0.00190476		5.5838	2.72841		0.492773	0.69897	0.248881	0.166171		6.2837	6.36877	3.94122	1.83929	1.98952	1.37436
	49	1.33333	1.33333						6.76241	0.783426		27	15.3333		0.205714	0.154286	0.131429	0.156667	0.117143	0.131905	0.0761905	0.0214286	0.0047619	0.00047619	0.377143	0.184762	0.148571	0.108571	0.0514286	0.0657143	0.0285714	0.0242857	0.00809524	0.00285714		5.42241	1.54433		0.907098	0.74693	0.47882	0.43591		6.20939	5.69848	6.13563	3.35896	3.49011	3.18942
	50	3.33333	2.33333						6.31259	14.0025		21.3333	20.3333		0.31381	0.211905	0.158095	0.11619	0.0785714	0.0542857	0.0371429	0.022381	0.00571429	0.00190476	0.82	0.09	0.0371429	0.0295238	0.0128571	0.00619048	0.00238095	0.000952381	0.00047619	0.00047619		3.83983	3.34811		0.830101	0.734192	-0.106002	0.188741		6.93386	4.58025	3.7792	2.52506	1.22154	1.07228
	51	3.66667	2.33333						0.757222	1.505		8.33333	14.3333		0.144762	0.171429	0.279048	0.169524	0.108095	0.0714286	0.0338095	0.0190476	0.00190476	0.000952381	0.0052381	0.0128571	0.0380952	0.122381	0.231905	0.251429	0.22	0.0852381	0.0280952	0.0047619		1.18324	1.74138		0.800208	0.584312	1.14621	0.5248		4.45662	5.045	4.50113	4.06401	4.74063	4.75082
	52	3	2.33333						0.67	4.52648		8.33333	27		0.69619	0.161905	0.0561905	0.0419048	0.0195238	0.0128571	0.0052381	0.00285714	0.00190476	0.00142857	0.680952	0.199048	0.0647619	0.0261905	0.0114286	0.00761905	0.0047619	0.00190476	0.00190476	0.00142857		1.14439	4.73522		-0.120777	0.0730713	0.177536	0.240893		1.95251	1.31282	1.53125	1.95967	1.6105	2.6785
	53	1.66667	0.666667						0.839907	1.35398		8.66667	13.3333		0.772857	0.123333	0.0371429	0.0319048	0.0147619	0.0109524	0.00333333	0.00333333	0.00142857	0.000952381	0.539524	0.161905	0.117619	0.0666667	0.0628571	0.032381	0.0128571	0.0052381	0.00047619	0.00047619		1.17259	1.50619		-0.173925	0.0585753	0.655761	0.67534		2.05119	1.03195	1.26382	5.06717	5.42645	5.15349
	54	1.33333	0.666667						1.97102	4.13917		15	13.3333		0.608571	0.203333	0.0695238	0.0533333	0.0319048	0.0195238	0.00857143	0.00380952	0	0.00142857	0.625714	0.234286	0.0866667	0.0352381	0.00809524	0.00714286	0.00190476	0	0.00047619	0.00047619		2.0822	3.26894		-0.0757686	0.0691457	0.131613	0.177879		0.964854	2.03372	1.59909	1.38917	1.52834	2.18165
	55	1	0.666667						2.24315	0.880833		11.6667	5.5		0.584762	0.2	0.127143	0.0395238	0.027619	0.00952381	0.00571429	0.00285714	0.00142857	0.00142857	0.441905	0.0595238	0.0442857	0.0871429	0.100952	0.171905	0.0547619	0.0347619	0.00380952	0.000952381		2.16329	0.899742		0.294691	0.318523	0.616913	0.514408		3.14016	2.40585	2.48381	1.07434	2.85094	3.29654
	56	0.333333	1.66667						0.501944	1.27037		6.33333	6.33333		0.363333	0.174286	0.155238	0.101905	0.0957143	0.0533333	0.0304762	0.0147619	0.00857143	0.00238095	0.404762	0.272857	0.0942857	0.129524	0.0528571	0.0195238	0.0147619	0.00666667	0.00238095	0.00238095		0.768074	1.26314		0.350858	0.335115	-0.0551063	-0.0458819		3.14536	2.37904	2.1463	1.27423	1.24928	1.02358
	57	0.333333	2.66667						7.23056	4.59444		17.6667	11.3333		0.737619	0.117143	0.0652381	0.0366667	0.0161905	0.0142857	0.00761905	0.00190476	0.000952381	0.00238095	0.323333	0.259048	0.177143	0.0995238	0.0638095	0.0304762	0.0228571	0.0119048	0.00809524	0.00380952		3.61844	2.00017		-0.299344	-0.114597	0.10393	0.101453		0.973373	0.964476	1.20391	1.88568	1.01672	1.33647
	58	0	3.66667						1.64537	0.527315		17.3333	7		0.057619	0.0952381	0.135238	0.21	0.17	0.141429	0.110952	0.0495238	0.0214286	0.00857143	0.0414286	0.067619	0.194286	0.163333	0.188571	0.199048	0.0819048	0.0428571	0.0166667	0.00428571		2.82469	0.796263		0.859172	0.558522	0.662233	0.301067		4.69737	4.59656	4.53261	2.62424	2.89613	2.64621
	59	0	3						4.4262	1.48565		18.6667	7.66667		0.777619	0.0752381	0.042381	0.0385714	0.0261905	0.0214286	0.00904762	0.00333333	0.0047619	0.00142857	0.78619	0.0604762	0.0314286	0.022381	0.0190476	0.027619	0.0190476	0.0204762	0.00857143	0.0047619		3.28095	1.19013		0.216264	0.45097	-0.27793	-0.0989433		4.43737	1.7065	1.22089	1.37488	1.19734	0.938037
	60	0	2.33333						2.01722	9.10833		17.6667	18		0.215714	0.284286	0.188095	0.137619	0.082381	0.0461905	0.0280952	0.0104762	0.00619048	0.000952381	0.325714	0.213333	0.184762	0.172381	0.0538095	0.0261905	0.017619	0.00333333	0.00142857	0.00142857		3.24606	3.03329		0.646031	0.515999	0.171916	0.0755928		5.149	3.55322	3.27985	1.5156	1.46532	1.72825
	61	0	1.33333						1.16759	2.69481		9.66667	8.33333		0.70619	0.097619	0.0566667	0.0461905	0.0347619	0.0242857	0.02	0.0104762	0.00285714	0.000952381	0.0314286	0.105714	0.267143	0.20619	0.19619	0.137143	0.0409524	0.012381	0.00285714	0		1.62697	1.81835		0.304754	0.511356	0.959439	0.481915		2.06901	4.36233	3.95288	3.96062	4.33407	3.99948
	62	0	2.66667						6.26037	2.86722		19.6667	14.3333		0.634762	0.155238	0.0790476	0.0566667	0.0328571	0.022381	0.00809524	0.00714286	0.00285714	0.000952381	0.201429	0.15619	0.11381	0.183333	0.121429	0.132857	0.0447619	0.0357143	0.00714286	0.00333333		4.34677	2.40527		0.0672913	0.211379	0.430529	0.259677		0.846164	1.97676	2.31906	2.23197	2.6893	2.33262
	63	0	2.33333						7.79639	1.46898		27	6.66667		0.2	0.12619	0.139524	0.161905	0.16	0.115238	0.0604762	0.0257143	0.00904762	0.00190476	0.372857	0.218571	0.160952	0.14381	0.0566667	0.0228571	0.0166667	0.0052381	0.00047619	0.00190476		5.31737	1.03289		0.7966	0.638167	0.457461	0.381164		4.86211	4.88999	5.01781	3.11377	3.83015	3.58375
	64	0	2.66667						1.42269	4.4625		11.3333	13		0.27619	0.231429	0.139524	0.114762	0.0952381	0.0719048	0.0404762	0.0195238	0.00571429	0.0052381	0.287619	0.391905	0.154762	0.110476	0.0333333	0.0147619	0.00238095	0.00428571	0	0.00047619		2.05648	2.24036		0.891893	0.725697	0.167016	0.0140554		3.70175	7.30916	6.11742	1.5117	1.48287	1.50923
	65	0.333333	2						0.63537	0.659444		9.33333	5		0.612381	0.144286	0.09	0.04	0.0480952	0.0347619	0.0128571	0.012381	0.00238095	0.00285714	0.0819048	0.247619	0.275238	0.183333	0.100476	0.0771429	0.0247619	0.00619048	0.00238095	0.000952381		1.00483	0.747369		0.153109	0.313124	0.649578	0.350318		3.38453	1.17203	0.985526	3.09217	2.45037	2.27214
	66	0.333333	2.66667						1.44787	6.33759		9	13.6667		0.774762	0.131429	0.0547619	0.0238095	0.00571429	0.00619048	0.00142857	0.000952381	0	0.000952381	0.538571	0.151429	0.171429	0.0519048	0.0604762	0.017619	0.00285714	0.00190476	0.00285714	0.000952381		1.60412	2.71238		-0.196973	0.0020906	-0.180822	-0.126465		1.79065	1.21214	0.558484	0.952333	1.12724	1.25385
	67	0.333333	2						1.10657	1.13241		9.33333	5.33333		0.531905	0.199048	0.12619	0.0490476	0.0457143	0.0214286	0.00714286	0.0114286	0.0052381	0.00285714	0.0280952	0.0814286	0.108571	0.154286	0.209048	0.172381	0.139048	0.07	0.0285714	0.00857143		1.30875	0.955643		0.16073	0.205237	0.801924	0.43335		1.60891	2.4102	1.79876	2.62273	3.3244	3.05438
	68	0	2.66667						4.11481	3.23065		18.3333	9		0.582381	0.247619	0.0904762	0.0361905	0.0166667	0.0128571	0.00761905	0.00285714	0.00190476	0.00142857	0.280476	0.331905	0.119524	0.13381	0.047619	0.042381	0.0314286	0.00380952	0.00714286	0.00190476		3.38791	1.25902		0.0439805	0.116856	0.0540027	-0.0197043		1.08552	2.2366	1.12608	1.51198	0.991917	1.37545
	69	0.333333	2.33333						16.7213	1.00093		40	4.66667		0.417143	0.14381	0.169048	0.10619	0.0904762	0.0338095	0.0285714	0.00619048	0.00333333	0.00142857	0.0295238	0.128095	0.241429	0.197619	0.241429	0.11381	0.0342857	0.0109524	0.00238095	0.00047619		6.96104	0.974459		0.61435	0.529932	0.50929	0.100033		3.15117	4.08024	4.06985	1.84901	1.93247	1.88784
	70	0.666667	3.66667						1.56537	1.21315		11.6667	4.33333		0.0538095	0.15381	0.125714	0.18	0.21381	0.15619	0.0752381	0.0266667	0.0114286	0.00333333	0.394286	0.17381	0.198571	0.0661905	0.0514286	0.057619	0.022381	0.0252381	0.0047619	0.00571429		1.92591	0.823464		1.22327	0.842674	0.000401938	-0.0112365		6.32531	5.93076	7.55965	1.41322	0.890792	1.34745
	71	0.666667	2.66667						7.8712	0.660926		20.6667	10.3333		0.598095	0.207619	0.0942857	0.0295238	0.0290476	0.0209524	0.00619048	0.00952381	0.00285714	0.00190476	0.190952	0.14381	0.288095	0.105238	0.153333	0.0790476	0.0171429	0.0109524	0.01	0.00142857		3.91673	0.65879		0.194617	0.284637	0.0839138	-0.0843555		2.53128	2.24926	2.60519	1.2567	1.08064	1.34188
	72	0.333333	2.66667						1.40593	2.7513		8.33333	7		0.0933333	0.121905	0.207143	0.222381	0.142381	0.101905	0.0647619	0.0347619	0.00952381	0.00190476	0.815238	0.17	0.0119048	0.00047619	0.00047619	0.00047619	0	0.00047619	0.00047619	0.00047619		1.52279	0.994021		0.896041	0.592923	-0.179847	-0.181253		5.13204	4.90949	4.85012	0.945777	0.76652	1.18317
	73	0	1.66667						2.50907	6.34056		15.3333	12.6667		0.466667	0.228095	0.125714	0.0766667	0.0352381	0.0428571	0.0142857	0.00619048	0.00380952	0.00047619	0.0185714	0.07	0.193333	0.277143	0.227619	0.138571	0.0533333	0.0133333	0.0052381	0.00285714		2.24986	1.94255		0.147962	0.18264	0.439537	-0.00260436		2.68019	2.33696	2.26238	1.58591	1.58277	1.51078
	74	0	1.66667						1.17398	1.85889		10.3333	5.33333		0.469048	0.261905	0.109524	0.0861905	0.042381	0.0214286	0.00571429	0.00285714	0.00047619	0.00047619	0.0171429	0.0233333	0.0461905	0.115714	0.177619	0.309524	0.215714	0.0780952	0.0128571	0.00380952		1.31623	0.99975		0.399513	0.352155	0.802127	0.288372		1.19489	2.9985	2.85289	2.5765	2.42941	2.84853
	75	0.333333	1.33333						0.924907	1.31259		5	5		0.66381	0.176667	0.0838095	0.0409524	0.0209524	0.00714286	0.00333333	0.00190476	0.00047619	0.000952381	0.077619	0.184762	0.0952381	0.219524	0.11381	0.19381	0.0866667	0.0142857	0.012381	0.00190476		0.907983	0.988649		0.0696612	0.119333	0.269253	-0.000108393		1.43135	1.62514	1.97082	1.62508	1.41849	1.45848
	76	0.333333	1.33333						1.45556	1.38167		7	5.33333		0.382857	0.301429	0.154762	0.0871429	0.0209524	0.027619	0.0128571	0.0104762	0.00142857	0.00047619	0.24381	0.10619	0.236667	0.117143	0.160476	0.0909524	0.0219048	0.0133333	0.00809524	0.00142857		1.40861	0.918542		-0.0339017	-0.0419222	0.11813	-0.00495769		1.32328	1.42739	1.17743	1.31815	1.49567	1.2733
	77	0.333333	2						3.55935	2.90046		22	9.66667		0.368571	0.190476	0.122857	0.0966667	0.0757143	0.0580952	0.032381	0.0295238	0.0152381	0.0104762	0.205714	0.22381	0.129048	0.217143	0.0680952	0.107143	0.0347619	0.00761905	0.0047619	0.00190476		3.57436	1.68816		0.163029	0.148791	0.140403	-0.0369011		1.32741	2.15477	1.63917	1.35532	1.37864	1.35623
	78	0	2.33333						10.3755	0.603889		23.3333	4.66667		0.454286	0.28619	0.116667	0.0557143	0.0352381	0.0242857	0.0157143	0.00619048	0.00428571	0.00142857	0.106667	0.165714	0.225238	0.221429	0.150476	0.08	0.037619	0.00952381	0.00190476	0.00142857		3.91996	0.787018		0.551371	0.553198	0.462467	0.227413		4.38448	3.97329	4.2605	2.38005	2.53536	2.32503
	79	0.333333	2.66667						2.56074	5.18694		16	13.3333		0.0128571	0.0547619	0.123333	0.154286	0.236667	0.25	0.106667	0.0390476	0.017619	0.0047619	0.540952	0.194286	0.118571	0.0404762	0.0480952	0.0328571	0.0052381	0.0157143	0.00190476	0.00190476		3.10602	2.1286		1.01601	0.593281	-0.219043	-0.104015		4.81751	4.47929	5.02952	1.30246	0.917587	0.723056
	80	0.333333	2						3.74009	1.00472		13.6667	6.33333		0.492857	0.129048	0.0833333	0.077619	0.0509524	0.0504762	0.0528571	0.0338095	0.0247619	0.00428571	0.0328571	0.0919048	0.204286	0.268571	0.171429	0.154286	0.0380952	0.032381	0.0047619	0.00142857		2.48626	1.18556		0.408366	0.492204	0.714912	0.328093		3.93719	2.51698	3.84884	2.58564	2.96226	3.19793
	81	0.333333	2.33333						4.64028	2.43778		12.6667	7.33333		0.219524	0.235238	0.201905	0.146667	0.0914286	0.0519048	0.0285714	0.0119048	0.0104762	0.00238095	0.511905	0.180952	0.1	0.0819048	0.0628571	0.04	0.0147619	0.0047619	0.00238095	0.00047619		2.29674	1.44243		0.572882	0.395546	0.00204601	0.0739244		4.17172	3.75732	3.15026	1.8124	0.680445	1.37909
	82	0	1.66667						0.696389	2.66574		8	10		0.0671429	0.10381	0.152857	0.198571	0.211429	0.158571	0.0666667	0.0295238	0.00952381	0.00190476	0.184762	0.200952	0.283333	0.134286	0.104762	0.0452381	0.022381	0.0138095	0.00857143	0.00190476		1.08518	1.86394		0.666544	0.361112	0.386994	0.159096		3.67574	3.55754	3.33787	1.79658	2.15239	1.68684
	83	0	1						1.32769	3.95565		7.5	12.6667		0.772381	0.108571	0.057619	0.0233333	0.0147619	0.0109524	0.00333333	0.00619048	0.00142857	0.00142857	0.204286	0.258095	0.266667	0.0747619	0.0847619	0.057619	0.0257143	0.0138095	0.012381	0.00190476		1.02733	2.16342		-0.157148	0.0355036	0.425818	0.270432		1.88256	0.816252	0.914742	2.92606	2.14869	1.79779
	84	0	0						0.538241	9.56722		5.66667	25.3333		0.440476	0.248571	0.160476	0.0757143	0.0542857	0.0109524	0.0052381	0.00285714	0.00047619	0.000952381	0.0628571	0.188095	0.252857	0.234762	0.112381	0.0852381	0.04	0.0147619	0.00666667	0.00238095		0.791553	3.74761		0.123095	0.0117117	0.597218	0.335142		1.30963	1.64951	1.37848	2.51728	2.66595	3.4334
	85	0.666667	1.33333						0.870833	1.18315		8.33333	5.66667		0.681429	0.168095	0.0795238	0.0219048	0.0261905	0.0152381	0.00142857	0.00428571	0.000952381	0.000952381	0.0271429	0.0685714	0.15619	0.25	0.223333	0.172857	0.0747619	0.0171429	0.00857143	0.00142857		1.09959	1.00293		-0.269023	-0.10152	0.980786	0.573754		1.1336	1.13005	0.850075	4.66523	5.64333	5.49583
	86	0.666667	1.33333						1.46194	6.25269		7	13.6667		0.639524	0.212381	0.0704762	0.0457143	0.0147619	0.01	0.00142857	0.00380952	0.00142857	0.00047619	0.4	0.210476	0.14381	0.0980952	0.0328571	0.0671429	0.0195238	0.0214286	0.0052381	0.00142857		1.19582	2.06898		-0.060065	0.0412303	0.0730391	0.0012717		1.15092	1.42576	1.68449	1.25048	1.69423	1.20726
	87	0.666667	2.33333						0.606389	0.932315		6	5		0.405714	0.214286	0.161905	0.101905	0.06	0.027619	0.0166667	0.00809524	0.00285714	0.000952381	0.0180952	0.0657143	0.161905	0.329048	0.224286	0.122381	0.062381	0.0114286	0.00333333	0.00142857		0.834394	0.794841		0.164931	0.0776648	0.796067	0.315756		1.71098	1.81831	1.67961	2.90118	2.9155	3.17772
	88	0	1.33333						0.682685	2.77731		9	9.5		0.672857	0.187619	0.0695238	0.0352381	0.00952381	0.00952381	0.00904762	0.00285714	0.00238095	0.00142857	0.36619	0.188095	0.255238	0.0738095	0.0742857	0.0285714	0.00619048	0.0047619	0.00142857	0.00142857		1.46961	1.42695		-0.217249	-0.0786289	-0.0304374	-0.0997195		0.677943	1.02573	1.47246	1.13237	1.15725	1.20058
	89	0	1.33333						0.881019	4.1838		6.33333	12.3333		0.832381	0.0595238	0.0247619	0.0166667	0.0266667	0.0190476	0.00952381	0.0052381	0.0052381	0.000952381	0.0990476	0.219524	0.254286	0.219048	0.129524	0.0590476	0.0109524	0.00619048	0.00190476	0.00047619		1.01491	2.14144		-0.16578	0.167202	0.443625	0.154409		2.44374	0.41137	0.36815	1.91098	2.18755	2.17749
	90	0	0.666667						6.88213	1.21574		21.3333	5.66667		0.449048	0.271429	0.147143	0.0557143	0.0395238	0.017619	0.012381	0.00333333	0.00190476	0.00190476	0.182857	0.152857	0.182857	0.151429	0.177143	0.0942857	0.037619	0.0161905	0.00380952	0.000952381		4.19733	1.23964		-0.055015	0.00642751	0.621571	0.330706		1.35352	1.4644	1.34863	1.96702	2.47931	2.68219
	91	0	1						0.721574	1.86361		5	11.3333		0.262857	0.149524	0.158571	0.13	0.118095	0.104286	0.0480952	0.0185714	0.00761905	0.00238095	0.359048	0.19619	0.145714	0.0595238	0.103333	0.0690476	0.03	0.027619	0.00714286	0.00238095		0.839781	2.11602		0.837723	0.622973	0.084841	0.093297		5.04742	4.568	4.53785	1.49394	1.40036	1.65791
	92	0.333333	2.33333						5.60222	2.85519		12	24.3333		0.555714	0.136667	0.172381	0.042381	0.0485714	0.0285714	0.00619048	0.00428571	0.00285714	0.00238095	0.516667	0.148571	0.130952	0.0733333	0.0480952	0.0461905	0.0219048	0.0109524	0.00238095	0.000952381		1.77396	2.75224		-0.141719	-0.075834	0.270355	0.32552		0.77682	1.20047	1.34988	2.74784	2.01239	2.36314
	93	1.66667	2						3.59944	11.6967		13.6667	25		0.00571429	0.047619	0.139048	0.209048	0.30619	0.19381	0.0609524	0.0309524	0.00619048	0.00047619	0.600476	0.247143	0.0852381	0.04	0.0195238	0.00380952	0.00190476	0.00142857	0	0.00047619		2.42438	3.26141		0.74836	0.248945	0.455634	0.439686		2.83446	2.71673	2.43923	4.26849	3.0136	3.88532
	94	2.66667	2.33333						0.573889	0.867593		4.33333	7.33333		0.180476	0.21619	0.232381	0.16	0.1	0.0571429	0.0261905	0.0214286	0.0047619	0.00142857	0.022381	0.0757143	0.118571	0.17381	0.300476	0.209524	0.0690476	0.0233333	0.0052381	0.00190476		0.681693	1.34782		0.556235	0.3846	1.06806	0.513405		3.53227	3.46363	2.94584	4.89924	4.15918	4.66156
	95	3	1						1.58963	0.775833		9.66667	4		0.570476	0.161905	0.0980952	0.112857	0.02	0.0171429	0.0133333	0.00333333	0.000952381	0.00190476	0.71	0.072381	0.0585714	0.0514286	0.0409524	0.0409524	0.0138095	0.00857143	0.00142857	0.00190476		1.75538	0.710665		-0.241172	-0.166411	-0.0616842	0.129633		0.889693	1.0208	0.984688	1.27871	1.54287	1.81599
	96	2	1.33333						0.578981	9.33639		7.66667	20.6667		0.438571	0.18381	0.132857	0.111429	0.0638095	0.0385714	0.0180952	0.00857143	0.00380952	0.00047619	0.419048	0.186667	0.142381	0.109524	0.0614286	0.057619	0.0119048	0.0047619	0.00380952	0.00285714		0.838301	3.80687		0.201296	0.244371	-0.110232	-0.148335		2.40934	1.88193	1.64102	1.13199	0.882173	0.990947
	97	1	0.666667						1.47417	2.13213		5.66667	19		0.77	0.129048	0.0457143	0.037619	0.00761905	0.00333333	0.0047619	0.00142857	0	0.00047619	0.0628571	0.0828571	0.147619	0.187619	0.179048	0.161429	0.0957143	0.0538095	0.0204762	0.00857143		1.11953	2.97235		-0.237335	-0.0766002	0.970179	0.580568		1.24338	1.25092	1.0506	4.41059	4.73306	4.48026
	98	0.333333	0.666667						5.77889	6.70213		17.6667	21.3333		0.214762	0.241905	0.212857	0.087619	0.119048	0.0728571	0.0180952	0.0247619	0.00428571	0.00380952	0.628571	0.182857	0.0809524	0.0438095	0.0280952	0.0138095	0.00714286	0.00666667	0.0047619	0.00333333		3.50839	3.27411		0.168547	0.0490356	0.328814	0.4731		1.20214	1.62775	1.60987	2.98854	4.65271	2.15512
	99	0	1						7.81241	0.621852		22.6667	8.66667		0.210952	0.165714	0.157143	0.172381	0.118571	0.0871429	0.057619	0.0180952	0.0104762	0.00190476	0.0785714	0.273333	0.284762	0.204762	0.0871429	0.037619	0.0209524	0.00809524	0.00428571	0.00047619		4.09647	1.17578		0.761844	0.545108	0.826213	0.515093		4.09459	4.0756	2.89215	5.50594	3.78664	3.927
	100	0.333333	1						1.62111	0.576296		9.33333	4		0.0809524	0.199048	0.207143	0.197143	0.147143	0.0890476	0.05	0.0195238	0.00857143	0.00142857	0.78619	0.11619	0.0366667	0.0280952	0.00904762	0.0128571	0.00428571	0.00285714	0.00238095	0.00142857		1.67908	0.699563		0.892785	0.61241	-0.206313	0.0703268		4.79826	4.81855	4.68873	1.94043	1.25627	1.57677
	101	0.333333	2.33333						2.03648	1.66296		14	7.66667		0.451429	0.267619	0.127143	0.0638095	0.0304762	0.0204762	0.0180952	0.0109524	0.00809524	0.00190476	0.65	0.158095	0.09	0.0461905	0.0290476	0.00857143	0.0114286	0.00333333	0.00285714	0.00047619		2.46669	1.44335		0.209813	0.225071	-0.239354	-0.155173		2.63698	1.93546	1.69278	0.735898	0.936911	1.18105
	102	0.666667	2.33333						1.79	6.61259		11.3333	20.6667		0.621905	0.146667	0.0861905	0.0533333	0.0404762	0.0247619	0.0142857	0.00761905	0.00285714	0.00190476	0.362857	0.205238	0.13381	0.139048	0.0714286	0.0428571	0.0304762	0.00952381	0.00285714	0.00190476		1.37734	2.92357		0.30888	0.392115	0.220883	0.159373		1.57571	3.38249	3.17273	1.91419	1.47555	2.10805
	103	0.333333	2						4.95407	0.701204		14.6667	15.6667		0.383333	0.297143	0.213333	0.0561905	0.0242857	0.0161905	0.00619048	0.00142857	0.000952381	0.000952381	0.05	0.191429	0.319048	0.230476	0.120476	0.0609524	0.0190476	0.00571429	0.00190476	0.000952381		2.9328	1.24771		0.252853	0.139043	0.820372	0.465913		2.32305	2.21866	1.98497	4.87616	4.25863	4.52595
	104	0.333333	1						4.62491	3.25954		11.6667	10		0.121905	0.149524	0.233333	0.160952	0.139524	0.103333	0.0428571	0.0338095	0.0104762	0.00428571	0.858095	0.101429	0.0280952	0.00666667	0.00285714	0.000952381	0.00047619	0	0.000952381	0.00047619		2.25562	1.92586		0.694962	0.467282	-0.154156	0.0961145		3.30882	3.52454	3.48564	1.77199	1.55372	1.63323
	105	0	1.66667						1.65546	8.7537		8.66667	24.6667		0.17	0.100476	0.15619	0.13619	0.176667	0.136667	0.0690476	0.0342857	0.0180952	0.00238095	0.0838095	0.2	0.292857	0.102381	0.130952	0.116667	0.0380952	0.0171429	0.0114286	0.00666667		1.66059	3.69043		0.665103	0.353266	0.513156	0.284625		2.75657	3.05235	3.24234	2.57376	2.63243	2.24862
	106	0.333333	2.66667						0.762222	1.88713		14.3333	17.6667		0.383333	0.227143	0.101429	0.13	0.0519048	0.0614286	0.0261905	0.0114286	0.00619048	0.000952381	0.02	0.102857	0.282381	0.26619	0.175714	0.0952381	0.0328571	0.0152381	0.00714286	0.00238095		1.91132	2.44269		0.218919	0.220263	0.942192	0.567077		2.12552	1.88251	2.16228	5.65266	5.65562	4.60418
	107	0.333333	2.66667						0.727222	0.948426		7.33333	6		0.889524	0.04	0.0185714	0.0152381	0.0109524	0.01	0.00904762	0.0052381	0	0.00142857	0.59619	0.162381	0.111905	0.0738095	0.027619	0.017619	0.00714286	0.000952381	0.000952381	0.00142857		1.13913	0.814515		-0.117918	0.281333	0.275802	0.387868		1.30373	0.721909	3.19483	2.10737	2.88419	3.77384
	108	1	1.66667						1.53796	1.27963		10	6.66667		0.680476	0.0995238	0.0804762	0.0509524	0.0385714	0.0319048	0.0138095	0.00285714	0.00047619	0.000952381	0.397143	0.306667	0.173333	0.0795238	0.0185714	0.0214286	0.00190476	0.00047619	0.00047619	0.00047619		1.47919	1.17658		-0.138333	0.056572	-0.0229966	-0.0891011		1.03121	1.42103	1.64545	1.09982	1.20695	1.14269
	109	1	1						0.9225	5.94185		7.33333	15.3333		0.35619	0.280952	0.176667	0.0690476	0.0557143	0.037619	0.0171429	0.00333333	0.00142857	0.00190476	0.375238	0.201429	0.166667	0.0985714	0.0366667	0.0809524	0.0147619	0.0190476	0.00333333	0.00333333		1.11154	2.44796		0.186946	0.170025	0.107084	0.0706207		2.22611	1.59143	1.36471	1.7408	1.37415	1.37448
	110	1	0.666667						0.850463	6.8113		5.66667	14.3333		0.66381	0.138095	0.0842857	0.0461905	0.0295238	0.0271429	0.00714286	0.000952381	0.00190476	0.000952381	0.0309524	0.0852381	0.156667	0.247143	0.230476	0.167143	0.0638095	0.0128571	0.0047619	0.000952381		1.01012	2.36378		-0.0350336	0.0459265	0.773922	0.388804		1.78297	1.06054	1.32494	2.42197	3.07846	3.36219
	111	0.333333	2						9.94954	3.22519		21.6667	13		0.550476	0.197619	0.114762	0.0447619	0.037619	0.0295238	0.00714286	0.01	0.00666667	0.00142857	0.0114286	0.0390476	0.134286	0.158095	0.229524	0.201905	0.108095	0.0704762	0.0380952	0.00904762		3.91515	2.95445		-0.0703446	0.00437471	0.83323	0.373607		1.45735	1.3513	1.36382	3.06569	3.30483	3.26051
	112	0	2.33333						0.516944	0.558426		8	6.33333		0.022381	0.0785714	0.13	0.212381	0.181905	0.187143	0.112857	0.0471429	0.02	0.00761905	0.408571	0.18	0.113333	0.09	0.0738095	0.0542857	0.0404762	0.02	0.012381	0.00714286		1.0674	1.01287		0.997803	0.592748	0.508555	0.470477		5.17337	4.80812	4.76935	3.18799	3.617	3.54254
	113	1	3.33333						2.98694	1.07565		14.6667	4		0.843333	0.0652381	0.0352381	0.0190476	0.012381	0.0138095	0.0047619	0.00190476	0.00380952	0.00047619	0.686667	0.135238	0.07	0.0438095	0.027619	0.0185714	0.00904762	0.00619048	0.00238095	0.00047619		2.24068	0.770337		-0.286556	0.0283272	-0.253034	0.00555386		1.60627	0.882345	1.16879	1.43185	1.46051	1.25426
	114	1	2.33333						1.28889	6.82389		8	18.6667		0.268571	0.250476	0.23381	0.124762	0.0661905	0.0361905	0.01	0.00761905	0.00190476	0.00047619	0.29	0.191905	0.161905	0.120952	0.0909524	0.0957143	0.027619	0.0104762	0.0047619	0.00571429		1.44446	3.31053		0.475227	0.350379	0.0316702	-0.113319		3.16902	3.13514	2.53513	1.14444	1.20294	1.13121
	115	1.33333	2						2.54213	1.07491		8	10.6667		0.445714	0.143333	0.149524	0.0880952	0.0733333	0.0590476	0.0266667	0.0109524	0.00238095	0.000952381	0.0447619	0.17	0.22619	0.26	0.148571	0.0771429	0.0404762	0.017619	0.0114286	0.00380952		1.46907	1.54746		0.110215	0.159706	0.834032	0.519898		1.71499	1.60706	2.00078	5.44217	4.82237	4.25381
	116	0.333333	2.33333						0.747222	1.17944		7	6.33333		0.160952	0.155714	0.24	0.150476	0.119048	0.116667	0.0290476	0.0195238	0.00714286	0.00142857	0.71619	0.12	0.0719048	0.0438095	0.0233333	0.0157143	0.00380952	0.00190476	0.00285714	0.00047619		1.05104	1.16155		0.405198	0.167043	0.0313711	0.189619		2.06166	1.82131	1.96772	0.64254	2.1134	2.24727
	117	0.333333	1.66667						3.15	1.16685		21	4		0.734286	0.119048	0.0609524	0.0361905	0.0247619	0.0104762	0.00619048	0.00428571	0.00285714	0.000952381	0.351905	0.214286	0.168095	0.122381	0.077619	0.037619	0.0166667	0.00809524	0.00238095	0.000952381		3.78006	0.762822		-0.12655	0.0216183	0.0716775	0.0650377		1.00714	1.67165	1.49522	0.760587	1.60162	1.43868
	118	0.333333	1.33333						0.661389	0.919907		4	4		0.657143	0.137619	0.06	0.0480952	0.0266667	0.032381	0.0261905	0.00761905	0.00333333	0.000952381	0.262857	0.16619	0.162381	0.13	0.111429	0.117619	0.0242857	0.0119048	0.00904762	0.00428571		0.800079	0.814294		0.498311	0.577498	0.0670157	-0.117577		4.46319	3.97754	3.77158	1.17455	1.16338	1.1412
	119	0.333333	0.666667						0.537963	5.15046		6	16.6667		0.522381	0.21	0.127143	0.05	0.06	0.0204762	0.00571429	0.00285714	0.000952381	0.00047619	0.450476	0.161429	0.111429	0.0861905	0.067619	0.0771429	0.0238095	0.01	0.00428571	0.00761905		0.735583	2.54822		-0.179543	-0.0968669	-0.0362559	-0.089219		0.533232	1.2074	1.16496	0.953132	1.24636	1.02333
	120	0.333333	0.666667						0.921667	2.45861		6	9.66667		0.756667	0.176667	0.0457143	0.0104762	0.00571429	0.00238095	0.000952381	0	0.00047619	0.000952381	0.0671429	0.242857	0.282381	0.205238	0.0990476	0.0690476	0.017619	0.00761905	0.0047619	0.00428571		1.03389	1.82347		-0.269248	-0.133369	0.711846	0.406237		1.2024	0.84922	1.18192	4.12518	3.93156	3.34755
	121	0.333333	0.666667						0.685741	0.621481		4	4		0.532857	0.2	0.117619	0.0680952	0.0228571	0.0333333	0.0142857	0.00809524	0.00190476	0.000952381	0.19619	0.178571	0.162857	0.140476	0.140952	0.0966667	0.0595238	0.0166667	0.00619048	0.00190476		0.796765	0.672635		-0.0354261	0.0144753	0.39069	0.260898		1.52699	1.23869	1.11193	2.18898	2.59664	2.51242
	122	1	0						8.45167	6.59		22.6667	19		0.621905	0.15	0.106667	0.0571429	0.03	0.0228571	0.00714286	0.00190476	0.00190476	0.00047619	0.495714	0.18619	0.125714	0.0709524	0.052381	0.0490476	0.0104762	0.00571429	0.00190476	0.00190476		3.63974	2.82539		-0.16384	-0.0986697	-0.206572	-0.17222		0.924221	1.29988	0.975507	0.885246	1.13626	0.705912
	123	1.33333	1						17.6879	0.936574		19.1667	6.33333		0.0557143	0.120476	0.232857	0.236667	0.172857	0.108095	0.05	0.0147619	0.00619048	0.00238095	0.0180952	0.147619	0.294286	0.231905	0.175238	0.0795238	0.0328571	0.0142857	0.0052381	0.000952381		2.79217	1.02677		0.926942	0.561071	0.818885	0.451078		4.0856	5.00041	4.2513	4.92101	4.19109	3.79195
	124	1.33333	2						4.28611	1.59194		13	6.66667		0.00285714	0.0180952	0.0447619	0.157619	0.348571	0.340476	0.0752381	0.012381	0	0	0.457619	0.205714	0.150476	0.0980952	0.0495238	0.0266667	0.00619048	0.00380952	0.00142857	0.00047619		2.20734	1.22606		1.24768	0.445942	-0.0284579	0.0114746		3.92207	4.22406	3.8329	1.30818	1.41068	1.12224
	125	1.33333	2.66667						2.71546	0.702315		16.6667	6.33333		0.0971429	0.119524	0.214762	0.234762	0.20381	0.0885714	0.0304762	0.00666667	0.00380952	0.00047619	0.325714	0.237143	0.175714	0.114762	0.0361905	0.0761905	0.012381	0.017619	0.00238095	0.00190476		2.48909	0.832922		0.632063	0.34387	0.201928	0.0885127		2.59838	3.15193	2.79965	1.82782	1.5489	1.88164
	126	1.33333	2.66667						0.691296	5.2813		6.33333	10.6667		0.408571	0.277143	0.155714	0.0904762	0.0295238	0.0219048	0.00857143	0.00571429	0.00142857	0.000952381	0.48381	0.246667	0.150476	0.0695238	0.032381	0.00952381	0.00380952	0.00285714	0	0.000952381		1.08489	1.96139		0.433844	0.39604	-0.153468	-0.0793955		3.17588	3.26779	3.13824	1.18444	1.0039	1.18779
	127	1	2						6.01796	0.852963		16	4.66667		0.790476	0.110476	0.0552381	0.0228571	0.0161905	0.00285714	0.000952381	0	0.00047619	0.00047619	0.0142857	0.0580952	0.212857	0.18	0.230952	0.13381	0.0957143	0.0557143	0.0161905	0.00238095		2.76281	0.84779		-0.160336	0.0353867	0.722741	0.292564		1.49782	1.67075	1.41926	2.72214	2.3223	2.40087
	128	0.666667	1.66667						1.59556	2.37056		7.66667	15.3333		0.05	0.140476	0.210952	0.235238	0.139524	0.131429	0.062381	0.0209524	0.00857143	0.00047619	0.390952	0.147619	0.198095	0.0728571	0.0604762	0.0752381	0.0280952	0.0157143	0.00571429	0.0052381		1.36078	2.63359		0.77945	0.441352	-0.0690698	-0.0717115		2.75055	3.54848	3.46524	1.36915	1.02406	1.10488
	129	0.666667	1						1.2875	2.09407		9.66667	17.3333		0.380476	0.19381	0.14619	0.144762	0.0619048	0.0390476	0.027619	0.00380952	0.000952381	0.00142857	0.55	0.217143	0.0809524	0.0642857	0.0319048	0.0280952	0.0147619	0.00761905	0.00190476	0.00333333		1.63445	2.19412		0.202912	0.133787	0.37485	0.420547		1.24245	1.48722	1.97852	2.57021	3.81864	3.27145
	130	0.666667	1						9.3362	6.61944		19.6667	20.6667		0.52	0.186667	0.121905	0.0814286	0.0509524	0.0195238	0.01	0.00380952	0.00380952	0.00190476	0.615238	0.235714	0.0757143	0.0361905	0.0171429	0.00952381	0.0047619	0.00190476	0.00238095	0.00142857		3.88764	5.22743		0.109747	0.213372	0.320992	0.34126		1.11702	2.2156	2.09186	4.25817	2.60803	2.25882
	131	0.333333	1						1.83296	0.607315		9	6.33333		0.0342857	0.087619	0.129048	0.133333	0.171905	0.205238	0.14381	0.0742857	0.0161905	0.00428571	0.411429	0.0580952	0.0738095	0.0933333	0.107143	0.118095	0.08	0.0438095	0.012381	0.00190476		1.71558	0.95815		0.97017	0.589686	0.820822	0.718289		5.53288	5.16957	4.98792	3.6543	5.33616	5.61088
	132	0.666667	0.666667						0.911111	1.76102		6.33333	13		0.338571	0.209048	0.18	0.0895238	0.0885714	0.0585714	0.0166667	0.0147619	0.00333333	0.000952381	0.643333	0.182857	0.0747619	0.0414286	0.0233333	0.0166667	0.00714286	0.00619048	0.00190476	0.00238095		0.972858	2.45572		0.263154	0.234411	-0.216586	-0.0185663		2.2096	2.2791	2.11023	1.62204	1.27236	1.25359
	133	1	0.666667						2.43389	2.82926		10.3333	15		0.423333	0.270476	0.16	0.0766667	0.0404762	0.0133333	0.0104762	0.00333333	0.000952381	0.000952381	0.648571	0.119524	0.082381	0.0566667	0.0380952	0.0247619	0.0114286	0.00857143	0.00666667	0.00333333		2.21004	3.31503		-0.0404287	-0.0119508	0.245764	0.390178		1.04265	1.59522	1.00358	2.37603	3.65267	1.63123
	134	1	1.33333						4.87565	1.09361		17.3333	10.6667		0.367143	0.174286	0.161429	0.106667	0.0742857	0.0471429	0.0352381	0.0166667	0.0133333	0.00380952	0.515238	0.124286	0.103333	0.0652381	0.0861905	0.0504762	0.0314286	0.0161905	0.0052381	0.00238095		2.95064	1.52032		0.386301	0.3444	0.451673	0.520487		1.33422	2.89372	2.2704	3.91022	3.91042	2.65353
	135	0.666667	1.66667						4.86852	0.535648		11.6667	6.33333		0.156667	0.242857	0.236667	0.149048	0.0990476	0.0714286	0.0257143	0.012381	0.00428571	0.00190476	0.710952	0.132381	0.0628571	0.0438095	0.0228571	0.0214286	0.00238095	0.00285714	0	0.00047619		2.13949	0.918424		0.688032	0.469916	0.0388629	0.181934		4.06125	4.18743	3.57183	1.46898	1.90681	2.41678
	136	1	2.66667						1.59	1.56648		9.5	11.6667		0.047619	0.0538095	0.130952	0.141905	0.261905	0.207619	0.097619	0.042381	0.0128571	0.00333333	0.713333	0.155714	0.0628571	0.0247619	0.017619	0.01	0.00666667	0.00571429	0.00238095	0.000952381		2.09117	1.60626		0.687397	0.33031	-0.27112	-0.0369566		2.68755	2.94504	2.82194	0.630606	1.72618	0.795966
	137	1.66667	1.66667						0.523519	0.88787		4.33333	8.66667		0.627143	0.118095	0.0604762	0.0538095	0.0395238	0.0466667	0.0209524	0.0204762	0.01	0.00285714	0.57381	0.197619	0.131429	0.0509524	0.0214286	0.0138095	0.00714286	0.00190476	0.00142857	0.00047619		0.606261	1.23359		0.201397	0.320388	0.194925	0.205816		0.532168	1.53561	2.64403	1.11657	1.91307	2.78704
	138	1.33333	2.33333						0.825833	1.85991		8	8.66667		0.57381	0.27619	0.0942857	0.0257143	0.0166667	0.00809524	0.00142857	0.00333333	0	0.00047619	0.662857	0.19381	0.0519048	0.0461905	0.0214286	0.012381	0.0052381	0.00285714	0.00190476	0.00142857		1.09145	1.41403		-0.281068	-0.21734	-0.0516504	0.0911709		0.942474	0.968549	0.862716	1.55453	1.34893	1.99035
	139	1	1						1.72222	2.3212		10.3333	10.3333		0.609524	0.179048	0.123333	0.0385714	0.02	0.0185714	0.00428571	0.00428571	0.00142857	0.000952381	0.384762	0.250476	0.107619	0.132857	0.0619048	0.0457143	0.012381	0.00285714	0.00047619	0.000952381		1.55878	1.88376		-0.0831076	0.0380049	0.269491	0.15046		1.20659	1.58303	1.63228	1.46607	1.84694	1.58055
	140	0.666667	1						1.8838	4.79417		13.3333	14.3333		0.505714	0.242857	0.127619	0.0604762	0.0257143	0.0161905	0.0114286	0.00714286	0.00190476	0.000952381	0.308095	0.24619	0.186667	0.109524	0.0609524	0.0404762	0.0290476	0.0109524	0.0052381	0.00285714		2.48149	2.42306		0.236089	0.192786	0.365713	0.275025		1.49326	2.08523	2.32141	2.36571	2.78217	2.29107
	141	0.666667	0						3.86528	6.74917		17.6667	26.6667		0.640476	0.132857	0.082381	0.0461905	0.0347619	0.0357143	0.0119048	0.0104762	0.00285714	0.00238095	0.0990476	0.17619	0.270476	0.188571	0.145714	0.0785714	0.0233333	0.0119048	0.0052381	0.000952381		3.01505	4.59175		0.275034	0.394712	0.680713	0.384364		2.13466	1.28623	3.69136	3.34285	2.37617	3.18596
	142	0.333333	0.333333						9.83704	2.77231		29	15		0.367619	0.20619	0.172381	0.136667	0.0528571	0.0347619	0.0195238	0.00333333	0.0047619	0.00190476	0.348571	0.22	0.144762	0.0957143	0.09	0.0761905	0.0214286	0.00190476	0.00047619	0.000952381		4.90421	2.67405		0.587181	0.479295	0.82925	0.661978		2.12008	4.50818	4.26681	3.66344	4.85038	5.48477
	143	0.333333	0.666667						2.00102	1.01981		18	14		0.0909524	0.205238	0.189048	0.174762	0.19619	0.0990476	0.03	0.0114286	0.00047619	0.00285714	0.482857	0.200952	0.128095	0.0657143	0.0519048	0.0395238	0.0180952	0.00952381	0.00285714	0.00047619		2.64507	1.42741		0.992864	0.690569	0.442843	0.427169		4.69662	5.79727	5.96743	1.70638	2.57883	3.58377
	144	1	1						0.616019	1.64639		11.3333	6		0.666667	0.151905	0.0942857	0.0371429	0.0190476	0.0152381	0.00666667	0.0047619	0.00333333	0.000952381	0.80381	0.122381	0.0404762	0.0157143	0.00714286	0.0052381	0.00190476	0.00238095	0.00047619	0.00047619		1.31111	1.05705		0.301251	0.422437	0.00852132	0.154549		2.87312	2.20737	4.08576	1.48491	2.48397	1.96837
	145	2	1.66667						1.86778	1.43898		13.3333	7.66667		0.847143	0.0690476	0.0433333	0.0166667	0.0119048	0.00571429	0.00333333	0.00142857	0	0.00142857	0.224286	0.24619	0.210476	0.154286	0.0480952	0.0638095	0.032381	0.0133333	0.00571429	0.00142857		2.0124	1.31364		-0.210406	0.117641	0.216532	0.0240955		0.737937	2.38968	0.790734	1.65409	1.35729	1.44742
	146	2.66667	2						3.70907	2.81435		10.3333	13.3333		0.52619	0.218571	0.108571	0.062381	0.0309524	0.0333333	0.00952381	0.00571429	0.00333333	0.00142857	0.474286	0.183333	0.133333	0.111905	0.0428571	0.0271429	0.017619	0.00380952	0.00428571	0.00142857		2.08094	1.79743		0.271325	0.303713	0.158055	0.118476		3.41256	1.47622	2.55579	2.06031	1.4468	1.89944
	147	2.33333	2.33333						4.6887	0.987222		18.3333	8.33333		0.103333	0.159524	0.216667	0.183333	0.127143	0.092381	0.062381	0.0347619	0.0114286	0.00904762	0.215238	0.36	0.257143	0.0847619	0.0385714	0.0247619	0.012381	0.00428571	0.00190476	0.000952381		2.59115	1.21096		0.569266	0.318259	0.449378	0.254651		2.42279	2.49563	2.72089	3.10819	2.4119	2.86044
	148	1.66667	3.33333						2.63667	1.67444		20.6667	6.33333		0.130952	0.294762	0.287143	0.163333	0.0704762	0.0271429	0.0161905	0.00380952	0.00380952	0.00238095	0.62	0.200952	0.0719048	0.06	0.017619	0.0171429	0.00904762	0.00238095	0.00047619	0.00047619		3.49923	1.17904		0.671053	0.413492	-0.00558508	0.0831296		4.82425	3.49738	4.24178	0.804527	1.85672	2.04096
	149	1.33333	3.33333						10.39	2.42259		34	23		0.635714	0.151905	0.0952381	0.0438095	0.0261905	0.02	0.0180952	0.00238095	0.0047619	0.00190476	0.192857	0.229048	0.201429	0.159048	0.10381	0.0652381	0.03	0.0147619	0.00333333	0.00047619		7.71744	3.73524		0.421055	0.543973	0.223871	0.071527		3.77134	3.68494	4.46452	1.5758	1.58304	1.88091
	150	1	3.33333						3.57769	1.25731		14.3333	8.33333		0.322381	0.131905	0.114762	0.138095	0.10381	0.0952381	0.0452381	0.03	0.0138095	0.0047619	0.719048	0.114762	0.0766667	0.0347619	0.02	0.012381	0.00761905	0.00857143	0.00380952	0.00238095		2.66333	1.3021		1.01662	0.887473	0.38428	0.572319		2.89532	6.81751	7.71258	4.34913	3.67257	4.18999
	151	0.666667	1.33333						0.626111	2.4037		6.33333	10.6667		0.262857	0.198095	0.220476	0.131905	0.0861905	0.06	0.0233333	0.01	0.00571429	0.00142857	0.416667	0.274286	0.119048	0.0695238	0.0338095	0.04	0.0238095	0.0152381	0.00380952	0.00380952		0.928912	1.64062		0.553602	0.425426	0.099444	0.114643		3.17028	3.41695	3.39226	1.489	2.02724	0.967056
	152	1.33333	1.66667						1.57898	5.25028		24	17		0.695714	0.125238	0.0604762	0.0528571	0.0261905	0.0214286	0.00952381	0.0052381	0.00190476	0.00142857	0.267619	0.225714	0.18619	0.144762	0.0890476	0.0571429	0.0133333	0.00619048	0.00619048	0.00380952		3.16522	3.10879		-0.203349	-0.0320253	0.380881	0.215008		1.07341	1.49401	0.952195	2.0183	2.02426	2.4317
	153	2	1.33333						16.0728	2.52769		32.6667	9.66667		0.849524	0.0657143	0.0261905	0.0190476	0.0152381	0.0119048	0.00428571	0.00333333	0.00380952	0.000952381	0.199048	0.144762	0.213333	0.184286	0.117143	0.0742857	0.037619	0.0180952	0.00714286	0.00428571		6.19599	1.81333		0.198377	0.500404	0.720182	0.492591		5.397	3.34511	2.76097	4.15965	2.94741	3.60473
	154	2	2						2.86287	9.43204		19.6667	21.3333		0.0633333	0.10381	0.168095	0.175238	0.171429	0.14	0.0980952	0.0504762	0.0238095	0.00571429	0.368095	0.253333	0.162381	0.0747619	0.0409524	0.0433333	0.0271429	0.02	0.0047619	0.0052381		3.33527	3.53052		1.20609	0.792111	0.402723	0.258477		7.32259	7.59114	7.99006	1.96588	2.15204	2.59415
	155	0.666667	2						1.35111	5.5737		11.3333	12.3333		0.483333	0.178571	0.136667	0.0928571	0.0538095	0.03	0.0128571	0.00857143	0.00142857	0.00190476	0.0109524	0.0538095	0.16381	0.233333	0.234762	0.17619	0.0804762	0.0357143	0.00952381	0.00142857		1.67623	1.96893		0.456802	0.523132	0.974605	0.547839		4.11699	4.07384	4.26881	4.50355	4.25745	4.37751
	156	0	2.66667						4.76102	2.38509		22	15.3333		0.630952	0.179524	0.101429	0.0380952	0.02	0.0133333	0.0047619	0.00714286	0.00333333	0.00142857	0.0147619	0.057619	0.152381	0.232857	0.199524	0.20381	0.101429	0.0285714	0.00761905	0.00142857		4.30963	2.50973		0.130691	0.224332	0.746144	0.294231		1.99081	2.19834	2.19683	2.88431	2.6587	2.92892
	157	0.333333	2.33333						12.6609	4.24083		25	10.3333		0.437143	0.163333	0.121905	0.117619	0.0733333	0.0471429	0.0252381	0.01	0.00333333	0.000952381	0.572857	0.23	0.106667	0.0433333	0.0242857	0.0104762	0.00238095	0.00333333	0.00333333	0.00333333		4.03421	1.78687		0.6777	0.63444	0.377505	0.399627		4.88928	5.01024	3.86151	3.2458	2.72193	3.21184
	158	0.666667	1.66667						0.884352	3.58435		7.66667	9.33333		0.0161905	0.0619048	0.161429	0.239048	0.223333	0.180476	0.0871429	0.02	0.00952381	0.000952381	0.0719048	0.114762	0.148571	0.179524	0.204762	0.158571	0.0842857	0.027619	0.00809524	0.00190476		1.06721	1.84036		1.10247	0.605758	0.627451	0.252092		5.07315	5.52335	5.63943	2.63771	2.11582	2.30402
	159	1	0.666667						0.524259	1.84157		8.66667	8.33333		0.590476	0.189524	0.101429	0.0685714	0.0190476	0.0119048	0.00761905	0.00809524	0.00285714	0.00047619	0.139048	0.144762	0.15381	0.179524	0.109524	0.134762	0.0866667	0.037619	0.0114286	0.00285714		1.02865	1.32092		-0.0533749	0.0282505	0.554411	0.264904		1.45156	1.90685	1.49176	1.57981	2.12303	1.97969
	160	1.33333	0.666667						9.7587	1.56796		28	5.66667		0.79381	0.0804762	0.0395238	0.0257143	0.0190476	0.0142857	0.0104762	0.00619048	0.0052381	0.0052381	0.344286	0.298571	0.12619	0.125714	0.0485714	0.0395238	0.00904762	0.00571429	0.00142857	0.000952381		5.68964	1.3844		-0.280454	0.0122668	0.265189	0.120877		0.94844	1.72944	1.06844	2.09779	1.5568	1.73111
	161	1.33333	0.666667						14.6503	13.7251		39.3333	29.3333		0.132381	0.22381	0.182857	0.130476	0.107619	0.11381	0.062381	0.0342857	0.01	0.00238095	0.28619	0.171429	0.155238	0.0690476	0.127143	0.0933333	0.0347619	0.0409524	0.0166667	0.0052381		6.8816	3.60332		0.989392	0.755085	0.195336	0.141262		6.69883	5.11085	5.85943	1.74567	1.60422	0.877
	162	1.33333	1.66667						8.31204	0.679815		18	6		0.178571	0.0995238	0.187143	0.19	0.148571	0.108095	0.0566667	0.0238095	0.00619048	0.00142857	0.0380952	0.111905	0.104286	0.293333	0.260476	0.128095	0.0595238	0.00380952	0	0.00047619		2.87947	0.908741		1.16585	0.837689	1.13752	0.556703		8.81417	8.5317	7.89198	3.95623	4.53879	4.41247
	163	0.666667	1.33333						5.77278	15.2152		18	20		0.027619	0.12	0.210476	0.211905	0.195714	0.148571	0.0604762	0.0190476	0.0052381	0.000952381	0.659048	0.139524	0.0838095	0.0490476	0.0166667	0.032381	0.00714286	0.00761905	0.00380952	0.000952381		4.0653	2.69686		0.919707	0.459313	-0.167609	-0.0415598		3.67672	3.8535	4.17652	1.40921	1.1099	0.99084
	164	0.333333	2.33333						6.0037	0.640463		34	3.66667		0.22619	0.155238	0.161905	0.120952	0.109048	0.0995238	0.062381	0.0452381	0.0114286	0.00809524	0.00238095	0.0109524	0.122857	0.320476	0.354286	0.130476	0.0457143	0.012381	0.00047619	0		5.3437	0.690765		0.761385	0.609093	1.18228	0.430859		5.19229	4.6016	4.95931	3.74338	4.22589	3.32843
	165	0.333333	2						1.56343	0.892222		18	4.66667		0.49619	0.219524	0.119524	0.0733333	0.0461905	0.0290476	0.00809524	0.00619048	0.000952381	0.000952381	0.511905	0.179524	0.11619	0.0752381	0.0452381	0.0319048	0.02	0.0119048	0.0047619	0.00333333		2.0268	0.767838		0.778419	0.727842	-0.193506	-0.16067		4.62356	7.07821	6.19868	1.06085	0.761411	0.959223
	166	1.33333	2.33333						1.67194	1.27102		17.6667	7		0.614762	0.215714	0.0847619	0.0357143	0.022381	0.0147619	0.00714286	0.00238095	0.000952381	0.00142857	0.33	0.140476	0.232381	0.102857	0.0714286	0.082381	0.017619	0.0166667	0.00380952	0.00238095		2.15092	1.12561		0.194077	0.306812	-0.049527	-0.11473		2.28122	2.79856	2.36891	1.19459	0.949609	0.901038
	167	1.66667	1.33333						1.08852	22.5331		14.6667	21		0.727619	0.12619	0.0795238	0.042381	0.0142857	0.00571429	0.00190476	0.00142857	0	0.000952381	0.40619	0.179048	0.157143	0.120952	0.0747619	0.0328571	0.0166667	0.00904762	0.00238095	0.000952381		1.66411	3.20085		0.223222	0.332625	0.104152	0.0513867		1.17691	3.24047	2.19228	1.66019	1.22525	1.21635
	168	1.33333	0.666667						7.14778	0.841574		28.3333	7		0.797619	0.100476	0.05	0.0309524	0.0114286	0.0047619	0.00333333	0	0	0.00142857	0.0128571	0.0404762	0.165714	0.366667	0.316667	0.0871429	0.0104762	0	0	0		6.37869	1.04821		0.0368358	0.221182	1.35282	0.505265		1.46711	2.75309	1.33042	4.0513	4.15605	4.70152
	169	0.333333	1						4.64852	3.48676		17.6667	10.6667		0.302857	0.178095	0.180952	0.130952	0.0785714	0.0442857	0.0290476	0.0309524	0.0190476	0.0052381	0.610952	0.151429	0.120476	0.0428571	0.0271429	0.0271429	0.0119048	0.00380952	0.00380952	0.00047619		3.06562	1.48397		0.854171	0.804731	-0.0749077	0.0204469		3.83738	8.3327	7.47278	1.5697	0.912316	1.3891
	170	0	1						1.24963	0.66		13.6667	6		0.184762	0.214762	0.21619	0.188571	0.0942857	0.057619	0.0266667	0.0114286	0.00380952	0.00190476	0.0828571	0.236667	0.271429	0.246667	0.0980952	0.0433333	0.0157143	0.00333333	0.000952381	0.000952381		1.93413	0.739357		0.667315	0.486519	0.542422	0.171426		4.46645	3.71464	3.70395	2.23514	2.14183	1.97098
	171	0.333333	1.33333						0.586759	8.28833		6	15.6667		0.749048	0.119048	0.0671429	0.0333333	0.00714286	0.012381	0.00285714	0.0052381	0.00238095	0.00142857	0.557143	0.275238	0.1	0.0380952	0.00952381	0.012381	0.00333333	0.000952381	0.00190476	0.00142857		0.803412	2.55		0.0967813	0.286485	-0.180456	-0.131146		0.479301	2.30216	2.73717	0.968755	1.24734	1.29904
	172	0.666667	1						0.586204	2.05269		6	6.33333		0.669524	0.184762	0.0766667	0.0328571	0.0147619	0.0152381	0.00333333	0.00047619	0.00047619	0.00190476	0.00857143	0.0361905	0.11	0.210476	0.235238	0.221905	0.117143	0.0466667	0.0128571	0.000952381		0.921821	1.12449		-0.23154	-0.0950619	0.918467	0.406541		0.635136	1.25513	1.28746	3.4481	3.41459	3.27535
	173	1	1						1.36731	1.36944		9	4.33333		0.686667	0.159048	0.0666667	0.04	0.0119048	0.0128571	0.00666667	0.00952381	0.0052381	0.00142857	0.124286	0.203333	0.244286	0.184286	0.124762	0.0628571	0.0361905	0.012381	0.0052381	0.00238095		1.31659	0.686066		-0.231951	-0.0353534	0.312322	0.0509569		0.546832	1.7877	1.09955	1.76768	1.46123	1.1956
	174	1.66667	1						1.57602	3.82269		9.66667	9		0.428095	0.286667	0.149048	0.0509524	0.0504762	0.0219048	0.00571429	0.00333333	0.00333333	0.00047619	0.0866667	0.128095	0.179048	0.357143	0.102381	0.0714286	0.0580952	0.00952381	0.00380952	0.00380952		1.58564	1.37118		0.135869	0.11945	0.136544	-0.163634		2.10947	1.43991	1.63677	1.16365	1.10307	1.05783
	175	1.66667	0.666667						1.57398	0.993148		17.6667	6.33333		0.45	0.245238	0.14381	0.0752381	0.0466667	0.0195238	0.0109524	0.00380952	0.00380952	0.000952381	0.0195238	0.09	0.194762	0.181905	0.249048	0.168095	0.0533333	0.0333333	0.00714286	0.00285714		2.19779	1.07088		0.197561	0.200204	0.582369	0.137096		2.28087	1.82543	2.14686	2.05344	2.0557	2.03491
	176	2.33333	0.333333						1.19185	1.6		10	7.33333		0.722857	0.132381	0.0761905	0.0409524	0.0147619	0.00761905	0.00285714	0.00142857	0	0.000952381	0.518095	0.177143	0.092381	0.0814286	0.0466667	0.0504762	0.017619	0.00952381	0.00571429	0.000952381		1.62798	1.4234		0.197	0.341986	-0.00298596	0.0297427		1.55014	2.57159	3.29021	1.33939	0.764158	1.6218
	177	1.33333	0						1.27796	1.08824		10.3333	4		0.679524	0.173333	0.0819048	0.0342857	0.0147619	0.0047619	0.00428571	0.00380952	0.00190476	0.00142857	0.387143	0.178095	0.139524	0.110952	0.082381	0.0642857	0.0204762	0.0114286	0.00380952	0.00190476		1.6376	0.703214		0.0762223	0.211649	0.20412	0.153327		1.36627	2.61194	1.9338	1.55511	1.55689	2.09389
	178	1	1.33333						0.693148	2.66537		11	10.6667		0.640476	0.147619	0.0966667	0.0528571	0.0295238	0.0166667	0.00857143	0.0047619	0.00142857	0.00142857	0.290476	0.190476	0.18	0.12	0.09	0.0966667	0.017619	0.00952381	0.00238095	0.00285714		1.37866	1.80311		0.106518	0.214207	0.036725	-0.152913		2.65569	1.75395	1.61682	0.890892	1.10652	1.19872
	179	0.666667	2						0.697222	1.62333		9	5.66667		0.833333	0.0728571	0.04	0.0252381	0.0157143	0.00380952	0.00238095	0.00238095	0.00285714	0.00142857	0.258571	0.205714	0.19	0.162381	0.102381	0.0538095	0.0190476	0.0047619	0.00238095	0.000952381		1.01183	0.86901		-0.159174	0.139456	0.425758	0.256023		0.519402	1.9546	1.97953	1.93583	2.36515	2.10891
	180	1.33333	2						2.85991	2.63898		11.6667	10.3333		0.763333	0.14	0.0557143	0.0190476	0.0142857	0.00333333	0.00190476	0.00047619	0.000952381	0.000952381	0.0966667	0.269048	0.302857	0.115714	0.142381	0.0485714	0.00904762	0.0119048	0.00285714	0.000952381		2.05966	2.15245		-0.156629	0.00510795	0.210408	-0.0609755		1.22889	1.38073	1.41403	1.12071	1.33327	1.44773
	181	1.66667	1.66667						9.70315	14.461		30	21.3333		0.189048	0.240952	0.267143	0.128571	0.0842857	0.0452381	0.0233333	0.01	0.00714286	0.00428571	0.422857	0.13381	0.124762	0.105714	0.0857143	0.062381	0.0361905	0.0233333	0.00380952	0.00142857		5.18427	3.33737		0.456352	0.313795	0.421436	0.332932		2.36525	2.94222	2.83293	2.7431	2.30912	2.62806
	182	1	1						1.35407	5.27269		12	22.3333		0.0666667	0.194762	0.326667	0.175714	0.101905	0.067619	0.0338095	0.0185714	0.0114286	0.00285714	0.00666667	0.01	0.111429	0.200952	0.288571	0.229524	0.101429	0.0442857	0.00666667	0.00047619		1.854	5.47545		0.986913	0.714688	1.1602	0.523404		5.3094	7.22614	7.00768	4.21925	4.89272	4.23841
	183	0.333333	1						1.20583	0.556204		16.3333	4.33333		0.685714	0.145238	0.0609524	0.0509524	0.0257143	0.0166667	0.00761905	0.00428571	0.00142857	0.00142857	0.446667	0.0695238	0.10381	0.118095	0.144286	0.0852381	0.0219048	0.00714286	0.00238095	0.000952381		2.16363	0.705317		0.131642	0.26811	0.722032	0.73842		1.3754	2.73639	2.50803	5.50983	5.9066	4.72812
	184	0.333333	0						1.09398	3.51417		25	11.6667		0.779048	0.114286	0.0428571	0.0280952	0.0147619	0.00904762	0.00666667	0.00190476	0.00047619	0.00285714	0.62619	0.14619	0.0795238	0.0914286	0.0190476	0.0142857	0.0152381	0.00333333	0.00285714	0.00190476		2.32943	2.37709		0.0812873	0.335183	-0.254766	-0.151615		1.60649	3.27512	2.24662	0.807181	0.763519	1.1784
	185	1.33333	0						0.792407	4.71472		8	12		0.781429	0.0904762	0.0614286	0.0338095	0.0214286	0.00666667	0.00190476	0.000952381	0.00142857	0.00047619	0.23381	0.129048	0.172857	0.115714	0.167143	0.126667	0.0352381	0.0161905	0.00285714	0.00047619		1.17583	2.61974		0.03901	0.367249	0.545822	0.376046		3.96741	1.24645	2.16063	2.63485	3.01767	2.00531
	186	1.66667	0						2.22389	0.625556		10.6667	6.66667		0.697619	0.121429	0.0957143	0.0309524	0.0190476	0.02	0.00666667	0.0047619	0.00238095	0.00142857	0.0914286	0.119524	0.139048	0.162381	0.16381	0.16381	0.0942857	0.0514286	0.0128571	0.00142857		1.66204	0.988918		-0.101051	0.0703453	0.673456	0.418258		1.56182	1.49143	1.4617	2.88099	2.70116	3.23344
	187	2	1						1.91435	1.53333		14.3333	8		0.303333	0.278571	0.182381	0.106667	0.0642857	0.0404762	0.0142857	0.0047619	0.00190476	0.00333333	0.77381	0.104762	0.0571429	0.0285714	0.00904762	0.0128571	0.00238095	0.00714286	0.00238095	0.00190476		2.51143	1.42533		0.347113	0.220641	-0.203734	-0.00483987		2.96589	2.25356	2.74258	0.772033	1.65999	0.899976
	188	1.33333	2.33333						9.94287	1.18954		19	7		0.63381	0.141905	0.0738095	0.0719048	0.0304762	0.0233333	0.0152381	0.0047619	0.00380952	0.000952381	0.469048	0.192381	0.162857	0.0528571	0.0485714	0.0395238	0.0214286	0.01	0.00238095	0.000952381		3.1703	1.21428		0.282022	0.399921	0.185637	0.153915		2.20601	3.11474	3.35591	1.61035	2.01643	1.6321
	189	1.66667	3.33333						0.557685	0.673333		12	8.66667		0.012381	0.0304762	0.0704762	0.104286	0.192857	0.251429	0.2	0.107143	0.0257143	0.0052381	0.563333	0.154286	0.102857	0.0819048	0.047619	0.0295238	0.0138095	0.00380952	0.00190476	0.000952381		0.990157	1.08669		0.997512	0.501101	0.075378	0.0843192		3.4619	4.12267	4.32775	1.64369	1.60869	0.867667
	190	1	2.66667						4.70556	6.18602		16.6667	17.3333		0.80381	0.137143	0.0304762	0.0142857	0.00619048	0.0052381	0.000952381	0.000952381	0	0.000952381	0.700476	0.163333	0.0519048	0.0461905	0.0171429	0.0128571	0.00428571	0.00142857	0.000952381	0.00142857		2.54512	2.76277		-0.253611	-0.00429579	-0.17177	0.0361046		1.3179	1.26466	1.24683	1.12854	1.81307	0.57297
	191	0.666667	1.33333						3.03528	1.87583		21.6667	8		0.118095	0.191905	0.256667	0.22381	0.10619	0.0761905	0.017619	0.0047619	0.00333333	0.00142857	0.0561905	0.207619	0.200476	0.17381	0.19381	0.11619	0.0309524	0.0128571	0.00761905	0.00047619		3.32799	1.58137		0.672611	0.405707	0.791411	0.441345		2.82138	3.1592	3.53761	3.24885	3.35048	3.66411
	192	0	0.333333						0.506667	4.49537		4.33333	14.3333		0.516667	0.223333	0.116667	0.0809524	0.0357143	0.0133333	0.0052381	0.00285714	0.00380952	0.00142857	0.360476	0.194762	0.137619	0.0942857	0.0585714	0.0585714	0.0557143	0.0280952	0.00809524	0.00380952		0.639684	2.12069		0.482198	0.522182	0.273194	0.199034		2.09964	4.1258	4.56227	2.02422	1.32879	1.22409
	193	0.333333	0.333333						2.39241	1.89148		27.3333	6.33333		0.592857	0.142381	0.159524	0.0409524	0.0447619	0.0114286	0.00380952	0.000952381	0.00285714	0.00047619	0.0528571	0.144286	0.222857	0.290952	0.151905	0.0780952	0.0447619	0.0104762	0.00285714	0.000952381		2.92553	1.16651		-0.295278	-0.194035	0.652765	0.326477		0.951614	0.763169	1.02601	2.54534	3.17015	2.52571
	194	0.333333	1						0.530185	0.752685		4.33333	10.3333		0.77619	0.153333	0.0371429	0.0133333	0.00714286	0.00619048	0.00285714	0.00238095	0	0.00142857	0.0914286	0.212857	0.248095	0.188571	0.122857	0.0666667	0.0409524	0.0204762	0.0047619	0.00333333		0.692957	1.20468		0.378835	0.466204	0.276802	0.0668874		3.26635	4.08183	3.58133	1.24276	1.75394	1.47896
	195	0.333333	1.66667						3.36083	3.17602		12.6667	19.3333		0.677619	0.120952	0.0771429	0.0704762	0.0195238	0.012381	0.0152381	0.00285714	0.00190476	0.00190476	0.75619	0.120476	0.0652381	0.0319048	0.0142857	0.00571429	0.00333333	0.00142857	0.000952381	0.00047619		2.2674	2.72681		-0.275572	-0.159294	-0.123387	0.0808729		0.885654	1.02617	0.841592	1.76259	1.45813	1.12207
	196	0	1.66667						6.49361	14.5309		12.6667	25.3333		0.144286	0.329048	0.226667	0.13	0.0652381	0.0519048	0.0271429	0.0142857	0.00571429	0.00571429	0.368571	0.297619	0.189048	0.0785714	0.0333333	0.0219048	0.00333333	0.00619048	0.00047619	0.000952381		2.05044	4.92309		0.526447	0.355528	0.501883	0.435654		2.81204	2.99234	3.23147	2.94108	3.2326	3.80609
	197	0	1.66667						4.05676	2.57963		15.3333	10.6667		0.00428571	0.0385714	0.138095	0.212381	0.271905	0.205714	0.0761905	0.04	0.0119048	0.000952381	0.0247619	0.0704762	0.13619	0.200952	0.226667	0.187619	0.0885714	0.0514286	0.0119048	0.00142857		2.47172	2.05789		0.812486	0.311846	1.16229	0.692238		2.4441	2.5226	2.71217	6.29897	5.7504	6.72545
	198	0	1.66667						5.71306	31.7459		19	40.6667		0.23381	0.250476	0.191905	0.158095	0.0861905	0.0485714	0.0180952	0.00857143	0.00380952	0.00047619	0.364762	0.196667	0.140476	0.107619	0.08	0.0657143	0.0219048	0.0142857	0.00666667	0.00190476		2.97248	6.30504		0.608179	0.393	0.411557	0.313423		3.29301	2.98658	3.51622	2.66181	2.28998	2.55169
	199	0.333333	2						12.3661	5.65102		15	20.3333		0.0880952	0.262381	0.262381	0.185714	0.0990476	0.0614286	0.0257143	0.0109524	0.00285714	0.00142857	0.0114286	0.115714	0.294286	0.305238	0.172381	0.0804762	0.0185714	0.00190476	0	0		2.82284	2.75594		0.756868	0.473119	1.50169	0.799688		3.58007	4.28777	3.28989	7.0281	8.31392	8.01825
	200	0.666667	2.33333						3.7625	5.57898		23	19.3333		0.01	0.0557143	0.185238	0.235714	0.249524	0.185714	0.072381	0.00571429	0	0	0.115714	0.240952	0.263333	0.227619	0.109048	0.0261905	0.0104762	0.00238095	0.00333333	0.000952381		3.08362	3.08356		1.09223	0.450687	0.752127	0.44027		2.84258	3.03841	2.67529	2.77273	3.40029	3.46437
	201	0.666667	2.33333						0.874167	7.14157		14.6667	22.3333		0.39	0.319524	0.158571	0.0647619	0.0390476	0.0166667	0.00666667	0.00333333	0.000952381	0.00047619	0.072381	0.219524	0.269524	0.23381	0.0966667	0.067619	0.0304762	0.00904762	0	0.000952381		1.67352	3.82334		0.575477	0.489061	0.746555	0.489052		3.10144	4.09243	3.97481	2.51849	3.49877	2.35801
	202	1	2						1.01315	2.72222		10.3333	11		0.834286	0.0847619	0.042381	0.0185714	0.00809524	0.0052381	0.00238095	0.00285714	0	0.00142857	0.0719048	0.149048	0.205238	0.182381	0.166667	0.12381	0.0580952	0.0280952	0.01	0.0047619		1.69472	2.42269		-0.0584058	0.223631	0.853794	0.582443		1.04257	2.99678	2.1195	3.61839	5.04328	3.99873
	203	0.666667	1.33333						2.3262	1.03352		13.3333	6		0.790476	0.0761905	0.0371429	0.0347619	0.0261905	0.0114286	0.0119048	0.0052381	0.0047619	0.00190476	0.454762	0.10381	0.0942857	0.12381	0.0852381	0.0685714	0.0490476	0.0157143	0.00238095	0.00238095		2.23195	1.10721		0.00567295	0.229098	0.434924	0.384297		1.03761	2.31068	2.15293	2.48454	2.56741	2.98413
	204	0.666667	1						1.10278	1.84398		11.3333	6		0.430952	0.227143	0.146667	0.0861905	0.0390476	0.037619	0.0171429	0.00809524	0.0052381	0.00190476	0.403333	0.227143	0.148095	0.106667	0.032381	0.0390476	0.0257143	0.00952381	0.0052381	0.00285714		1.13255	0.85869		0.366648	0.348684	0.0143183	0.0442303		3.24424	2.54093	2.3292	1.13309	1.50438	1.58327
	205	0.333333	1						0.844907	1.0463		9	7.66667		0.67619	0.190952	0.097619	0.0214286	0.00857143	0.00333333	0	0.00142857	0	0.00047619	0.0361905	0.191429	0.29	0.247619	0.102381	0.0857143	0.0357143	0.00809524	0.00238095	0.00047619		1.19328	1.3549		0.042488	0.0540592	0.265757	-0.0661635		1.7015	1.87765	1.84943	1.49771	1.33281	1.40762
	206	1.66667	1						0.544815	1.89352		10.3333	8.66667		0.695238	0.183333	0.0638095	0.0261905	0.0119048	0.00952381	0.00428571	0.00238095	0.00190476	0.00142857	0.546667	0.161905	0.0666667	0.0747619	0.0409524	0.0461905	0.032381	0.0171429	0.0114286	0.00190476		1.16215	1.65331		-0.0731909	0.0767418	0.0196547	0.131908		1.10562	2.09877	1.53273	1.28367	1.52908	1.92471
	207	1.66667	1						2.46565	7.76444		15.6667	20.3333		0.872857	0.0580952	0.0347619	0.0161905	0.00619048	0.00571429	0.00142857	0.00190476	0.000952381	0.00190476	0.372857	0.262857	0.12	0.0990476	0.047619	0.0504762	0.0280952	0.00952381	0.00809524	0.00142857		2.38685	2.98563		-0.263751	0.0652624	0.27727	0.218353		0.922098	2.04957	1.25896	1.71527	2.27186	2.23816
	208	1.66667	1						0.993148	1.83648		16.3333	9		0.448095	0.232381	0.164762	0.0719048	0.0561905	0.0166667	0.00666667	0.00238095	0.00047619	0.00047619	0.118571	0.13619	0.19619	0.256667	0.162857	0.0914286	0.0271429	0.00761905	0.00238095	0.000952381		1.82509	1.45624		0.391931	0.377824	0.89011	0.475036		2.89571	2.85837	3.01115	3.84022	4.1738	3.32271
	209	0.333333	1.33333						0.796111	3.40676		12	12.3333		0.811905	0.0990476	0.0442857	0.0195238	0.00809524	0.00761905	0.00571429	0.00238095	0.000952381	0.00047619	0.46	0.287619	0.147143	0.0647619	0.0195238	0.0138095	0.00571429	0.00047619	0.00047619	0.00047619		1.63552	1.93175		-0.00298596	0.261285	0.263987	0.163234		1.54669	2.72086	2.82214	2.05768	1.91066	2.01618
	210	0.333333	1.66667						1.01713	7.04157		17	21.6667		0.747619	0.108571	0.0528571	0.0357143	0.0152381	0.02	0.00857143	0.0052381	0.00333333	0.00285714	0.131905	0.260952	0.269524	0.147619	0.113333	0.0447619	0.0142857	0.0128571	0.00190476	0.00285714		2.02388	3.8706		-0.0990263	0.213655	0.532341	0.285951		1.22084	1.78412	2.78261	1.89516	2.29426	2.81408
	211	0	1.66667						1.8025	1.0037		24	7		0.851905	0.0638095	0.0333333	0.0242857	0.0138095	0.00619048	0.00428571	0.00142857	0	0.000952381	0.225238	0.140476	0.189048	0.199048	0.117619	0.0647619	0.0319048	0.0195238	0.00809524	0.00428571		2.88383	1.20786		0.00737631	0.306184	0.84767	0.587779		0.685295	3.57225	2.19874	4.96578	4.09507	2.93726
	212	0	1.66667						0.707593	1.18241		11.5	7.33333		0.79619	0.108095	0.0419048	0.02	0.0133333	0.0109524	0.00714286	0.000952381	0.00047619	0.000952381	0.539524	0.13619	0.100476	0.087619	0.0509524	0.0580952	0.0166667	0.00666667	0.000952381	0.00285714		1.47401	1.29095		0.255875	0.45997	0.00160553	0.0820149		4.30026	3.20074	2.97752	1.05077	1.74136	1.32978
	213	0.333333	1						4.13241	3.46407		17.6667	12.3333		0.802381	0.0861905	0.0509524	0.0257143	0.0180952	0.00761905	0.00380952	0.00285714	0.00190476	0.00047619	0.578571	0.149524	0.10619	0.07	0.0347619	0.0385714	0.0114286	0.00619048	0.00333333	0.00142857		3.32081	2.47774		-0.150217	0.168501	0.0727671	0.110908		2.61461	1.17281	1.14326	1.13415	1.43003	1.86067
	214	0.333333	0.666667						4.39222	3.79583		19	11		0.351429	0.214762	0.164762	0.12381	0.062381	0.0371429	0.0266667	0.00809524	0.00761905	0.00333333	0.23619	0.238095	0.176667	0.101429	0.114762	0.0661905	0.0314286	0.0209524	0.0109524	0.00333333		2.71849	2.36782		0.616203	0.521244	0.539587	0.394057		4.9525	3.66318	3.96212	2.74012	3.27095	3.43
	215	0.333333	0						1.06917	4.87991		17.3333	14		0.182857	0.328571	0.23	0.121905	0.08	0.0409524	0.0114286	0.00285714	0.000952381	0.00047619	0.196667	0.146667	0.162381	0.20619	0.113333	0.0595238	0.0447619	0.0471429	0.0185714	0.0047619		2.05041	2.59796		0.642684	0.434327	0.579307	0.374349		3.79857	3.34667	3.46283	2.77596	2.51791	2.79212
	216	0	0.666667						3.6587	3.34546		17.6667	9.33333		0.811429	0.0942857	0.037619	0.0271429	0.0114286	0.01	0.00333333	0.00285714	0.00142857	0.00047619	0.149048	0.17	0.189524	0.160476	0.131905	0.111429	0.0585714	0.0204762	0.00666667	0.00190476		3.83452	2.27763		0.0290454	0.31184	0.688412	0.414633		1.97311	3.11214	3.31044	2.57691	2.77889	3.23951
	217	0.666667	1						1.4438	6.36491		16	16.6667		0.444762	0.164286	0.121905	0.101429	0.0652381	0.0419048	0.03	0.017619	0.00571429	0.00714286	0.160952	0.184762	0.144762	0.13619	0.0842857	0.111429	0.0928571	0.0490476	0.0252381	0.0104762		2.62055	2.86156		0.563327	0.583711	0.524456	0.357483		5.08752	3.1013	5.36562	2.75786	2.68263	2.5357
	218	1	2						4.14843	4.14593		17.3333	10		0.778571	0.0857143	0.0461905	0.0266667	0.0219048	0.02	0.0104762	0.0052381	0.00285714	0.00238095	0.0566667	0.118095	0.184286	0.218571	0.176667	0.138571	0.0719048	0.0257143	0.00761905	0.00190476		3.0393	1.90368		0.159506	0.418392	0.803792	0.456603		1.46033	4.46589	2.2801	2.89175	3.61148	3.46734
	219	1.66667	1.66667						2.62093	2.85454		17	16.6667		0.24381	0.25381	0.202857	0.135714	0.0695238	0.057619	0.0219048	0.0104762	0.00190476	0.00238095	0.0271429	0.0685714	0.195714	0.135714	0.224762	0.217619	0.0714286	0.0266667	0.0233333	0.00904762		3.48847	2.92745		0.617883	0.482774	0.617622	0.279594		4.43225	3.35143	3.68153	2.06781	2.5033	2.39549
	220	1.33333	1.33333						0.763796	2.25519		5	15.6667		0.575238	0.101429	0.123333	0.105714	0.0571429	0.0247619	0.00809524	0.00142857	0.000952381	0.00190476	0.432381	0.136667	0.12	0.0852381	0.0528571	0.082381	0.0666667	0.0195238	0.00380952	0.00047619		0.873452	2.52628		0.418455	0.542636	0.455536	0.466489		4.96271	1.38895	3.3022	3.55642	1.85706	2.48798
	221	1	0.333333						5.33991	12.795		23.6667	25.3333		0.469524	0.132857	0.180476	0.0595238	0.0866667	0.0433333	0.00904762	0.00619048	0.00904762	0.00333333	0.496667	0.193333	0.136667	0.0785714	0.0447619	0.0242857	0.017619	0.00380952	0.00142857	0.00285714		3.99746	4.21865		-0.117022	-0.0587609	0.353182	0.402482		1.32126	1.13013	1.19661	3.17275	3.18241	3.59556
	222	0.666667	0.333333						2.40769	7.32648		22	18.6667		0.379048	0.208095	0.161905	0.118571	0.0714286	0.0366667	0.0147619	0.00571429	0.00142857	0.00238095	0.0338095	0.118095	0.177619	0.205714	0.201905	0.178095	0.0666667	0.0152381	0.00190476	0.000952381		2.35213	2.75634		0.727534	0.601784	1.10704	0.625174		4.86995	6.21134	4.98654	5.24139	5.66357	5.59351
	223	0.333333	0.333333						3.15509	1.31602		19	6.33333		0.604286	0.27381	0.067619	0.0352381	0.0104762	0.00428571	0.00190476	0.000952381	0.00047619	0.000952381	0.0228571	0.117143	0.270952	0.24381	0.113333	0.0833333	0.0747619	0.052381	0.0185714	0.00285714		3.24469	1.327		0.3816	0.371462	0.864895	0.440333		2.9744	3.4991	2.75104	3.60654	2.50881	2.64461
	224	0.333333	1						3.32028	3.585		16.6667	11.6667		0.530476	0.22381	0.101905	0.0542857	0.0395238	0.0214286	0.0142857	0.00904762	0.00333333	0.00190476	0.341429	0.219048	0.154762	0.104762	0.077619	0.0495238	0.0252381	0.0147619	0.00857143	0.00428571		3.26598	2.37227		0.499012	0.511173	0.119262	0.122872		1.60452	4.72257	2.56027	1.6855	1.7872	1.57455
	225	0.333333	1						1.22259	5.81444		6	15.3333		0.509524	0.200476	0.0966667	0.0619048	0.037619	0.0438095	0.0271429	0.0171429	0.00428571	0.00142857	0.15	0.183333	0.175238	0.113333	0.140952	0.124286	0.0571429	0.0338095	0.0180952	0.00380952		1.2365	2.45172		0.521174	0.514014	0.554489	0.375164		3.46185	4.58607	3.20874	3.20833	2.44307	2.77912
	226	0.666667	1.66667						2.26306	2.65583		11.3333	6		0.515238	0.180952	0.13	0.087619	0.0419048	0.02	0.01	0.00571429	0.00619048	0.00238095	0.0257143	0.110476	0.148571	0.240952	0.204762	0.170476	0.067619	0.0219048	0.00714286	0.00238095		1.92668	1.01757		0.0872818	0.0921931	0.764508	0.38947		1.6152	1.56213	1.64458	3.15669	2.80993	3.05053
	227	0.666667	1						0.706852	2.98593		5	13.6667		0.42	0.205238	0.18381	0.0847619	0.05	0.03	0.0114286	0.0104762	0.00285714	0.00142857	0.01	0.0585714	0.156667	0.247143	0.124286	0.200476	0.128571	0.0585714	0.0128571	0.00285714		0.84732	3.05539		0.354695	0.284808	0.424201	0.00756298		2.63906	2.41691	2.32303	1.58108	1.63928	1.5812
	228	0.666667	0.666667						1.48481	0.97		10	8.33333		0.467143	0.230952	0.0842857	0.0871429	0.0357143	0.0490476	0.0266667	0.0104762	0.00619048	0.00238095	0.463333	0.147619	0.119048	0.0814286	0.0742857	0.0452381	0.0380952	0.0157143	0.00857143	0.00666667		1.62563	1.59687		-0.150672	-0.0719527	0.475079	0.485066		1.25625	1.29418	0.794681	0.97872	3.62804	3.16554
	229	0.333333	0.666667						1.26463	3.02389		11.3333	16		0.457619	0.225238	0.17619	0.0461905	0.047619	0.03	0.00904762	0.00333333	0.00333333	0.00142857	0.752381	0.0895238	0.0280952	0.0357143	0.0266667	0.0357143	0.0166667	0.0104762	0.00380952	0.000952381		1.51948	2.64071		0.171672	0.211023	-0.0132283	0.203269		1.56378	2.4539	1.87235	0.579459	1.44208	2.45455
	230	0.333333	1.66667						1.03361	0.56713		11.6667	7.33333		0.66	0.180952	0.0919048	0.0304762	0.0142857	0.012381	0.00285714	0.00428571	0.00190476	0.000952381	0.317619	0.188571	0.160476	0.129524	0.0809524	0.0842857	0.0304762	0.00619048	0.000952381	0.000952381		1.53188	0.973516		0.101963	0.181695	0.480566	0.421721		1.17997	2.27042	2.09909	3.28884	1.87591	2.71061
	231	0	2.33333						0.947222	1.98019		8	8		0.762857	0.110952	0.0609524	0.0214286	0.0238095	0.0133333	0.00285714	0.00190476	0.00142857	0.00047619	0.806667	0.0880952	0.0438095	0.0233333	0.0161905	0.0128571	0.00428571	0.00285714	0.000952381	0.000952381		1.3724	1.33577		0.0143572	0.185226	-0.246318	-0.011657		0.701794	1.52756	2.35555	0.972351	1.29431	1.42169
	232	0.333333	1.66667						1.09037	6.5988		6.66667	15		0.708571	0.0747619	0.0952381	0.042381	0.0319048	0.0280952	0.0104762	0.00571429	0.00238095	0.00047619	0.312857	0.192857	0.23619	0.0990476	0.0747619	0.0504762	0.0209524	0.0109524	0.00142857	0.00047619		1.06169	2.19016		-0.0235481	0.13748	0.296706	0.12573		0.348128	0.761205	1.94249	1.87733	1.6917	1.58552
	233	0.666667	0.666667							5.12972			12		0.469524	0.208571	0.142381	0.0833333	0.0280952	0.0447619	0.0109524	0.0114286	0.00047619	0.00047619	0.0219048	0.175238	0.262381	0.278095	0.165714	0.0766667	0.017619	0.00190476	0	0.00047619			1.8738		0.037574	0.025997	0.819465	0.340476		1.04889	1.44659	1.61472	2.93298	3.00189	2.53644
	234	1.33333	0.333333							7.11963			15												0.0333333	0.200476	0.229048	0.232857	0.13	0.119048	0.0328571	0.0185714	0.00333333	0.00047619			2.85576				0.710094	0.272723					2.63445	2.46875	2.43892
	235	1.33333	1.33333							1.48065			7												0.0257143	0.140952	0.19619	0.225238	0.164762	0.135238	0.0761905	0.0247619	0.00857143	0.00238095			1.44117				0.852457	0.455721					2.42476	3.40771	3.42008
	236	1.66667	2.66667							2.66231			8												0.411429	0.198571	0.132857	0.09	0.0604762	0.0471429	0.0280952	0.0209524	0.00809524	0.00238095			1.43585				0.170452	0.158715					1.04002	1.44576	2.08293
	237	1.66667	2.33333							1.34981			7.33333												0.100952	0.182381	0.280952	0.147619	0.111905	0.105238	0.0395238	0.0209524	0.00904762	0.00142857			1.38819				0.425259	0.157109					1.69889	2.06184	1.99963
	238	2.33333	2							8.26065			22.3333												0.433333	0.167143	0.131429	0.0914286	0.072381	0.0552381	0.0257143	0.0133333	0.00714286	0.00285714			3.43431				0.130274	0.142448					1.71545	1.43775	2.00791
	239	2	1.33333							4.58852			10.3333												0.0409524	0.207143	0.284286	0.168571	0.10381	0.103333	0.0638095	0.0219048	0.0052381	0.000952381			1.7058				0.917014	0.535839					4.1889	2.76604	2.71732
	240	2.33333	2.33333							7.67907			22.6667												0.0138095	0.0566667	0.169048	0.203333	0.202857	0.201429	0.0966667	0.0471429	0.00619048	0.00285714			6.22831				0.661672	0.231929					2.22819	2.37983	2.40453
	241	3.66667	2							1.93713			9.66667												0.312381	0.112857	0.12619	0.0885714	0.0842857	0.0838095	0.0852381	0.0590476	0.0385714	0.00904762			1.70409				0.885309	0.79437					1.14195	5.86426	5.07938
	242	4.66667	3							1.35213			6.33333												0.274286	0.28619	0.189524	0.102857	0.0619048	0.0414286	0.0266667	0.00857143	0.0052381	0.00333333			1.00407				0.287159	0.231492					2.53894	2.4257	1.78514
	243	4.33333	2.33333							2.91815			8.66667												0.321429	0.317619	0.161429	0.13619	0.0371429	0.0204762	0.00428571	0.000952381	0	0.00047619			1.88				0.131018	0.00176351					1.53333	1.41937	1.37761
	244	2.66667	2.66667							4.24565			23.3333												0.270476	0.160952	0.0909524	0.138095	0.0952381	0.135714	0.0685714	0.022381	0.0147619	0.00285714			3.76043				0.465107	0.274158					2.5362	2.23504	2.33602
	245	2.66667	1.33333							3.03731			13.6667												0.31619	0.195714	0.193333	0.117143	0.097619	0.062381	0.0142857	0.000952381	0.00190476	0.00047619			2.16732				0.627944	0.575238					4.0014	5.37403	3.41836
	246	4.33333	1							3.81093			15.3333												0.224286	0.230476	0.18381	0.112381	0.0838095	0.0728571	0.0561905	0.027619	0.00761905	0.000952381			2.2493				0.48249	0.335923					2.63121	1.29279	1.83075
	247	5.33333	1							3.78083			11												0.238095	0.258571	0.200476	0.177143	0.0709524	0.0385714	0.0114286	0.00190476	0.00190476	0.000952381			1.89427				0.581031	0.352047					3.02744	2.5209	2.66048
	248	4.66667	2							1.74778			6.66667												0.0633333	0.134286	0.170952	0.261905	0.15619	0.118095	0.0695238	0.017619	0.00666667	0.00142857			1.14114				0.577588	0.277442					1.9707	2.55209	2.5362
	249	3	2.33333							5.44574			21												0.215714	0.191429	0.216667	0.173333	0.0633333	0.105238	0.0147619	0.0171429	0.00190476	0.00047619			2.32465				0.242486	0.0573388					1.68676	1.53631	1.60372
	250	1.66667	2.33333							17.423			16.3333												0.0633333	0.319048	0.336667	0.200952	0.0495238	0.0204762	0.00571429	0.00285714	0.000952381	0.00047619			2.70114				0.736057	0.366357					3.72338	2.37351	2.70914
	251	1	1.33333							1.88731			5.33333												0.0252381	0.139524	0.327143	0.311429	0.16	0.0342857	0.00238095	0	0	0			0.887225				1.24112	0.431547					3.93063	4.27934	4.45906
	252	0.333333	2							1.72565			5.66667												0.0357143	0.151429	0.124762	0.27	0.115714	0.171429	0.0852381	0.022381	0.0161905	0.00714286			0.866761				0.275844	-0.0519662					1.43054	1.30081	1.22897
	253	0	3.33333							1.28852			12.6667												0.0552381	0.204286	0.300476	0.132381	0.193333	0.08	0.0142857	0.0152381	0.00380952	0.000952381			1.30047				0.236952	-0.0621005					1.03475	1.43935	1.2627
	254	0	4.33333							2.36509			10												0.584762	0.255238	0.0961905	0.047619	0.00809524	0.00428571	0.00238095	0.000952381	0	0.00047619			1.79694				0.110091	0.114099					1.82352	1.92493	1.6063
	255	0.333333	4.66667							4.31148			13												0.189048	0.219524	0.252381	0.0933333	0.097619	0.0904762	0.0404762	0.0114286	0.00285714	0.00285714			3.22193				0.373848	0.254535					2.47034	1.74589	2.30203
	256	1	3							6.79185			16												0.367143	0.082381	0.072381	0.111905	0.121905	0.113333	0.0742857	0.0352381	0.0161905	0.0052381			3.49236				0.634627	0.508116					1.47263	3.17913	2.88159
	257	1	2.33333							6.91343			14												0.141905	0.114286	0.131905	0.14	0.122857	0.144286	0.110476	0.062381	0.0257143	0.00619048			2.41461				0.831988	0.543119					2.50188	3.09015	3.45746
	258	1	1																						0.119524	0.0447619	0.131905	0.125714	0.162381	0.231905	0.106667	0.062381	0.0114286	0.00333333							0.839693	0.382848					2.6905	3.1407	3.58888
	259	0.666667	1.66667
	260	1	2.33333
	261	1.66667	3.66667
	262	1.33333	3
	263	1.66667	2.33333
	264	1	2.33333
	265	1	2
	266	0.666667	2
	267	0.333333	1.66667
	268	0.333333	1.66667
	269	0	1.66667
	270	0	2
	271	0.666667	2.33333
	272	1	3
	273	1.33333	2.66667
	274	2	3.33333
	275	2	2.33333
	276	3.33333	2
	277	2	1.33333
	278	1.66667	1.33333
	279	0.333333	1
	280	0.666667	1.66667
	281	1.33333	1.33333
	282	1	1
	283	1.66667	1
	284	1.66667	3
	285	2.33333	4
	286	1.66667	4
	287	1.33333	2.66667
	288	1.66667	2.33333
	289	1.66667	2.33333
	290	2	3
	291	1.33333	2.66667
	292	1	3.33333
	293	0.666667	2.66667
	294	1.33333	2.66667
	295	1.66667	1.66667
	296	3.33333	1
	297	2.66667	1.33333
	298	2.33333	1.33333
	299	0.666667	2
	300	1	2
	301	1.66667	2.66667
	302	1.66667	3.33333
	303	1.33333	4
	304	1	3.33333
	305	1	3.33333
	306	1.33333	2.66667
	307	1.66667	2.33333
	308	3.33333	1.33333
	309	3.66667	1
	310	3.33333	1.33333
	311	2	1.33333
	312	3	1.33333
	313	4.33333	1.66667
	314	5	2.66667
	315	3.66667	4
	316	2.66667	5
	317	2.33333	4
	318	2.66667	2.66667
	319	2	2
	320	1.66667	3
	321	2.33333	4
	322	3	3.66667
	323	3.33333	4
	324	2	3.66667
	325	2.66667	4
	326	2.33333	2.66667
	327	2.66667	2.33333
	328	1.33333	2
	329	0.666667	2.33333
	330	0.333333	2.66667
	331	0.333333	2.66667
	332	0.333333	3.66667
	333	0.666667	4.66667
	334	0.666667	4.33333
	335	0.666667	6
	336	1	9
	337	2	8.66667
	338	4.33333	7.66667
	339	4	4
	340	4	4.33333
	341	3	3.33333
	342	3.33333	2.66667
	343	2.66667	3
	344	2	2.66667
	345	1.33333	3.33333
	346	1	2.66667
	347	0.666667	2
	348	0.333333	0.666667
	349	0.333333	0.333333
	350	0.333333	0.333333
	351	1	1
	352	1	1
	353	0.666667	1
	354	0.666667	1
	355	0.666667	1.66667
	356	1	1.66667
	357	1	2
	358	2	1.66667
	359	2	1.33333
	360	1.33333	0.666667
	361	1	0.666667
	362	0.666667	2
	363	0.666667	3.33333
	364	0	3
	365	0	1.66667
	366	1	0
	367	1.66667	1.33333
	368	2.66667	3
	369	3.33333	3.66667
	370	3	2.66667
	371	3.66667	1
	372	3	0.333333
	373	3	1
	374	1.33333	2.33333
	375	0.333333	3
	376	1	2.33333
	377	2	1
	378	2	1
	379	2	0.666667
	380	3.33333	2.66667
	381	4	3
	382	5	3.66667
	383	4	2.33333
	384	4	1.66667
	385	3.66667	1
	386	2.33333	0.666667
	387	2.33333	0.333333
	388	1	0.333333
	389	2.66667	0.333333
	390	3	0.666667
	391	3.66667	1.66667
	392	2.66667	1.66667
	393	2.66667	3.33333
	394	2.33333	3
	395	2.66667	3
	396	2	1.33333
	397	2.33333	3.66667
	398	2.33333	4.66667
	399	3.33333	6
	400	2.33333	4
	401	2	3.33333
	402	1.66667	2.33333
	403	2	1.66667
	404	1.33333	2.33333
	405	1.33333	1.66667
	406	2.66667	2.66667
	407	3	2.66667
	408	3.66667	3
	409	3	2.33333
	410	4.33333	1.66667
	411	3	1.66667
	412	4	1.33333
	413	2.66667	1.66667
	414	3.33333	2
	415	2	2.33333
	416	2.33333	3
	417	1.33333	3.66667
	418	1	4
	419	0.666667	3.66667
	420	1.66667	3
	421	2	3.33333
	422	2	2.66667
	423	1	2.33333
	424	1	2
	425	2	1.33333
	426	3.33333	2.33333
	427	4	2.33333
	428	3.33333	4
	429	2.33333	3
	430	1	2.66667
	431	1.33333	1.66667
	432	2	1.33333
	433	2	1.33333
	434	2	1.33333
	435	1.33333	1.66667
	436	2.33333	1.66667
	437	2	1.33333
	438	2.33333	1.66667
	439	1.66667	1.66667
	440	2.33333	3.66667
	441	1.66667	3.66667
	442	1.33333	3.66667
	443	0	2.33333
	444	0	1.66667
	445	0.333333	2
	446	0.333333	1.33333
	447	0.333333	2.33333
	448	0	1.66667
	449	0	5
	450	0.333333	5.66667
	451	1	7
	452	1	5.66667
	453	1.33333	5.66667
	454	1	5.33333
	455	1.33333	3.33333
	456	0.666667	2.66667
	457	1	3.33333
	458	0.666667	3.66667
	459	0.666667	2.66667
	460	0	1.33333
	461	1.33333	0.666667
	462	1.66667	1.33333
	463	2.33333	1.33333
	464	1.33333	2.33333
	465	1.33333	2.66667
	466	1.33333	2.66667
	467	1	2.66667
	468	1.66667	3.33333
	469	2.33333	5.33333
	470	3.66667	5
	471	3	4.66667
	472	2	2.66667
	473	0.666667	2.33333
	474	0.333333	3.33333
	475	0.333333	3.66667
	476	1.33333	4.33333
	477	1.66667	5
	478	1.66667	5.33333
	479	2	6.33333
	480	2.66667	4
	481	2.33333	3.66667
	482	1	3
	483	2.66667	5
	484	4	5
	485	4.66667	4.33333
	486	3	3.33333
	487	2.66667	3.66667
	488	3.66667	3.33333
	489	3.66667	1.66667
	490	3.33333	0.666667
	491	2	3
	492	1	5.33333
	493	3.66667	7
	494	5	4.66667
	495	7	3.66667
	496	7	3
	497	7	3.33333
	498	5.66667	4.33333
	499	3.33333	5.33333
	500	2.66667	5.33333
	501	2.66667	3.66667
	502	1.66667	3
	503	0.666667	3.33333
	504	0.333333	3.33333
	505	0.666667	2.66667
	506	1.66667	2.33333
	507	1.66667	1.66667
	508	2.33333	1
	509	1.66667	0.666667
	510	2	0.666667
	511	2	1.33333
	512	2.66667	1.66667
	513	2	2
	514	1	1.66667
	515	0	2
	516	1.33333	2.33333
	517	3.33333	3
	518	4	2.33333
	519	4.33333	2
	520	2.66667	1.66667
	521	2.66667	4
	522	1	5.33333
	523	0.666667	6
	524	0	4
	525	0.333333	3.66667
	526	0.666667	3.33333
	527	0.666667	3.33333
	528	1.33333	4
	529	1.66667	3.33333
	530	2.66667	2.66667
	531	2	1
	532	2.33333	0.333333
	533	2	0.666667
	534	3.66667	0.333333
	535	4	0.666667
	536	4	0.333333
	537	2.66667	1.66667
	538	2.33333	1.66667
	539	2	2
	540	1.33333	1
	541	0.333333	1.66667
	542	0.666667	2
	543	1.33333	3.33333
	544	2	2.33333
	545	1.33333	1.66667
	546	0.666667	0
	547	0	1.33333
	548	0	2.66667
	549	0.666667	3.33333
	550	1	2.66667
	551	1	1.33333
	552	0.666667	2
	553	0.333333	2.66667
	554	0.333333	3
	555	0	2
	556	0.333333	1.66667
	557	0.666667	1.33333
	558	0.666667	1.66667
	559	0.333333	1.66667
	560	0.333333	2.33333
	561	0.666667	2.33333
	562	0.666667	1.33333
	563	0.333333	1
	564	0	0.666667
	565	0.666667	0.666667
	566	0.666667	1.33333
	567	0.666667	1.66667
	568	0.333333	2.66667
	569	0.666667	3
	570	1	3.33333
	571	0.666667	3
	572	0.666667	2.66667
	573	0.333333	2.33333
	574	0.666667	2.66667
	575	0.666667	2.33333
	576	0.666667	2.33333
	577	0.666667	2
	578	0.333333	2.66667
	579	0.333333	2.33333
	580	0	2
	581	0	1.66667
	582	0	3
	583	0	3.66667
	584	0	3
	585	0	3.33333
	586	0.333333	4.33333
	587	0.666667	4
	588	1	2.33333
	589	0.666667	1
	590	1.33333	3
	591	2	3.33333
	592	2	4
	593	1.66667	3.33333
	594	0.666667	4.33333
	595	1	4
	596	0.333333	4.33333
	597	2	5.33333
	598	3	6
	599	3.33333	6.33333
	600	2.5	5.5
	601	6	2.5
	602	7.33333	3.66667
	603	7.66667	3.66667
	604	6.33333	3.33333
	605	5.33333	3.66667
	606	5	5.33333
	607	7.33333	6.33333
	608	8	4.33333
	609	8.66667	2
	610	11.3333	3
	611	11.3333	3
	612	12.3333	4
	613	6	3.33333
	614	3.66667	4.66667
	615	5.33333	4
	616	8.66667	2.66667
	617	11.6667	1
	618	8.66667	1
	619	7.66667	1
	620	7	2.33333
	621	7.33333	3.66667
	622	5	4.66667
	623	2.33333	3.66667
	624	2.66667	1.33333
	625	8	1.66667
	626	8.66667	3.33333
	627	7	3.66667
	628	4	3.66667
	629	5	3
	630	5	3.66667
	631	2.66667	3.33333
	632	1.66667	2.66667
	633	3.33333	1.66667
	634	4.66667	1.33333
	635	5	1.66667
	636	4	2.66667
	637	4.33333	2.33333
	638	3.33333	2.66667
	639	3	2.33333
	640	4	2.66667
	641	5	2
	642	7	2
	643	7	2
	644	9.33333	3.33333
	645	10	3
	646	9.33333	3
	647	9.33333	1.33333
	648	9.33333	1
	649	9.33333	0.333333
	650	8	0.666667
	651	7.33333	4
	652	8.66667	7
	653	9.66667	6.66667
	654	11	3.66667
	655	9	1.66667
	656	9	2
	657	7.33333	4
	658	7.66667	4
	659	6.33333	5
	660	5	4.66667
	661	4.33333	4
	662	2.66667	4
	663	2.66667	2.33333
	664	2	4
	665	2.66667	5.33333
	666	4.66667	5.66667
	667	5.66667	6
	668	5.66667	3.66667
	669	3	3.66667
	670	2	2.33333
	671	1.33333	3.33333
	672	1	4.66667
	673	1.33333	4.33333
	674	3	4.33333
	675	3	4
	676	4.33333	5
	677	6.66667	5
	678	9	5
	679	8.33333	4.33333
	680	4.33333	4.33333
	681	3.33333	4
	682	3	3.33333
	683	3.33333	4.33333
	684	1.66667	3.66667
	685	0.666667	4.33333
	686	1.33333	4
	687	2	3.66667
	688	2.33333	5.33333
	689	2.66667	4.33333
	690	2.33333	5
	691	2.66667	3.66667
	692	2.33333	3.33333
	693	3	3
	694	3	3.33333
	695	2.66667	2.66667
	696	2.33333	4.66667
	697	3	3.66667
	698	2.66667	4.33333
	699	2.33333	3.66667
	700	1.66667	5.33333
	701	1	6.66667
	702	1	6.33333
	703	0.666667	6.33333
	704	1	6.33333
	705	0.666667	6
	706	1.33333	5.66667
	707	1.33333	3.66667
	708	2.66667	3.66667
	709	3	4.33333
	710	3.66667	5.66667
	711	3	7
	712	2.33333	5
	713	2.33333	6.66667
	714	2.66667	9
	715	3	12.3333
	716	6	11.6667
	717	6	9
	718	6	5.66667
	719	2	4.66667
	720	1.33333	3.66667
	721	1	4.33333
	722	1.66667	2.66667
	723	1.33333	4.33333
	724	0.666667	4
	725	0.666667	5
	726	1.33333	3.33333
	727	2.66667	3.33333
	728	2.66667	4.33333
	729	3.66667	5.33333
	730	3.33333	5.33333
	731	2.66667	4.33333
	732	1.66667	4
	733	1	5
	734	1.33333	5.33333
	735	1.66667	6.66667
	736	3.66667	6
	737	6.33333	5.66667
	738	5.33333	4
	739	3.33333	3.66667
	740	2.33333	4.33333
	741	4.33333	4.33333
	742	7	4.33333
	743	7.33333	3.66667
	744	7.66667	2.33333
	745	5.66667	2.66667
	746	4.66667	3
	747	5.66667	3.33333
	748	7	2.66667
	749	7	2
	750	6	2.66667
	751	6.66667	2.33333
	752	8.66667	3.66667
	753	9.33333	2.66667
	754	10.3333	3.66667
	755	11	3.33333
	756	11.3333	3
	757	12	2
	758	15.3333	1.33333
	759	17.3333	2.33333
	760	19	2
	761	15	1.66667
	762	12.6667	2.33333
	763	8.66667	4
	764	7.66667	4.33333
	765	5.66667	3.33333
	766	4.66667	2.66667
	767	5.66667	3
	768	8	3
	769	8.33333	3.33333
	770	6	3.33333
	771	3	4
	772	2.66667	3.66667
	773	4.33333	4.66667
	774	6.66667	4.66667
	775	6	5.33333
	776	4.33333	5
	777	3.33333	5.33333
	778	4.66667	6.33333
	779	4	5.66667
	780	4.66667	5.66667
	781	3	4.33333
	782	3.66667	3.33333
	783	3.33333	2.66667
	784	3.33333	2
	785	2.66667	3
	786	0.666667	3.33333
	787	0.333333	4
	788	0	4
	789	0.666667	4.66667
	790	0.666667	5
	791	0.666667	5.33333
	792	0	4
	793	1	3.66667
	794	3	3.66667
	795	5	3.33333
	796	6.33333	3.66667
	797	5.66667	4
	798	5	4.33333
	799	4.66667	4
	800	5.66667	3.33333
	801	4.66667	3
	802	3.33333	3
	803	2	3.66667
	804	2	4.33333
	805	3.66667	4
	806	4	3.66667
	807	4.33333	3.33333
	808	2.33333	3.33333
	809	2	2
	810	1.66667	3.66667
	811	2	5.33333
	812	1.66667	6.33333
	813	2	4.66667
	814	1.66667	4
	815	1.66667	5.33333
	816	1	6
	817	2	5.66667
	818	1.33333	4.33333
	819	2.66667	5.66667
	820	2.33333	5.33333
	821	2.66667	5.33333
	822	2	6.66667
	823	2	5.66667
	824	2.66667	5.66667
	825	2	3
	826	1	4.33333
	827	0	4.33333
	828	0	3.66667
	829	0	2.66667
	830	0.333333	2.33333
	831	0.666667	3
	832	1	3
	833	0.666667	2.33333
	834	0.333333	2.33333
	835	0.666667	3.66667
	836	2	5.33333
	837	3	5.33333
	838	3.33333	4.33333
	839	2	3.33333
	840	1.33333	3
	841	0.666667	4
	842	1	3
	843	0.666667	3.33333
	844	1	3
	845	1	4
	846	2	5
	847	2.66667	4.66667
	848	2.66667	3.66667
	849	2.33333	2.66667
	850	1	2.33333
	851	1	5.66667
	852	1.33333	5.33333
	853	3.66667	6.33333
	854	5.33333	4
	855	7.33333	3.66667
	856	6.66667	2.33333
	857	7.66667	2.66667
	858	7	3.33333
	859	8.33333	4
	860	7.66667	3
	861	6.33333	3.33333
	862	5.33333	2.33333
	863	6	3
	864	6.66667	3
	865	5.33333	3.33333
	866	5	2.66667
	867	6	2
	868	10.3333	2
	869	10.6667	3
	870	13.6667	3
	871	10.6667	3.33333
	872	9	3.66667
	873	3.66667	4.33333
	874	2.66667	4.66667
	875	4.66667	4
	876	9	3.66667
	877	14	4.33333
	878	12.3333	5
	879	10.6667	4.33333
	880	6.33333	3.33333
	881	5.33333	3.66667
	882	2.66667	5
	883	1.66667	7
	884	3	7.33333
	885	3	7.66667
	886	4	5.33333
	887	7	4
	888	9.66667	3
	889	13	4
	890	11.3333	3.33333
	891	11	2
	892	9	1.33333
	893	8	2.33333
	894	10	3.66667
	895	10.3333	3.33333
	896	12.6667	2.66667
	897	11	2
	898	9.66667	3.66667
	899	7.33333	3.33333
	900	5.66667	3.33333
	901	5.66667	2
	902	6	4
	903	5.66667	5.66667
	904	5	6.33333
	905	3.33333	6.33333
	906	3.33333	5.66667
	907	3.33333	5.66667
	908	2.66667	5.33333
	909	2.33333	5
	910	1.33333	4
	911	1.33333	2
	912	1.66667	2
	913	3.33333	2
	914	4	3.33333
	915	3.66667	2.33333
	916	2.66667	2.66667
	917	5	2.33333
	918	7.33333	4.33333
	919	8.33333	4.66667
	920	6.66667	5.33333
	921	4.66667	4
	922	4	4
	923	3.66667	4
	924	4	4
	925	4	4
	926	4.33333	4
	927	4.33333	4.33333
	928	5.33333	5
	929	6	4.66667
	930	7.33333	4.33333
	931	7.33333	4
	932	6	4.33333
	933	8.33333	4
	934	9.66667	3.66667
	935	17.3333	3
	936	15	2.66667
	937	12.6667	1.66667
	938	7.33333	0.666667
	939	7	0.666667
	940	6.33333	1
	941	5.33333	2
	942	7.66667	3.33333
	943	10.3333	4.66667
	944	11.3333	4.33333
	945	10.3333	3.33333
	946	11.3333	1.33333
	947	11.3333	1.33333
	948	15	0.666667
	949	15.6667	2
	950	13.6667	1.33333
	951	9.66667	1.66667
	952	10.6667	2.33333
	953	13.3333	4.66667
	954	12.3333	4.66667
	955	12.3333	4
	956	13.6667	2
	957	16	2.66667
	958	11.3333	2
	959	6.66667	4.33333
	960	3.33333	5.66667
	961	6	6
	962	12	4.33333
	963	13	3.66667
	964	13	3.33333
	965	7.33333	3.33333
	966	9.66667	3.33333
	967	11	4.66667
	968	12.6667	5
	969	9.33333	4.66667
	970	5.66667	4
	971	4.33333	4
	972	3.66667	3
	973	3.66667	1.66667
	974	4.66667	2.33333
	975	8.66667	2.33333
	976	9.33333	4
	977	10.6667	3
	978	8	3.66667
	979	8	4
	980	7.33333	4
	981	8.66667	4.66667
	982	9	5.66667
	983	9	6.66667
	984	9	7.66667
	985	8	6
	986	7.33333	5
	987	6.66667	4
	988	5.33333	3.33333
	989	6.66667	3.33333
	990	8.33333	4.66667
	991	13.3333	6
	992	13.6667	5.33333
	993	11.6667	4
	994	6.66667	2
	995	3.66667	2.33333
	996	5.33333	3.33333
	997	9.66667	4.66667
	998	9.66667	6.33333
	999	7	4
	1000	3	3.33333
	1001	3.33333	2.66667
	1002	3.33333	4
	1003	4.33333	7
	1004	5.33333	8
	1005	4.33333	8.33333
	1006	3.33333	6
	1007	2.66667	3.66667
	1008	4.33333	4
	1009	4.33333	3
	1010	4.66667	3.33333
	1011	3.33333	1.66667
	1012	3.33333	2
	1013	1.66667	1.66667
	1014	1	1.66667
	1015	0.333333	2.66667
	1016	0.333333	3.33333
	1017	1	3.66667
	1018	1	2.66667
	1019	0.666667	3.33333
	1020	1.66667	5
	1021	2.66667	6.33333
	1022	3	6
	1023	1.66667	5.33333
	1024	1.66667	4.33333
	1025	1.33333	3.33333
	1026	1	2.33333
	1027	1	2.66667
	1028	1.33333	4
	1029	1.33333	5.33333
	1030	0.333333	4.66667
	1031	1.33333	3
	1032	1.33333	1.33333
	1033	1.66667	1.66667
	1034	0.666667	2
	1035	0.666667	2.66667
	1036	2	1.66667
	1037	3	1.66667
	1038	3.66667	1.33333
	1039	4.33333	1.66667
	1040	5	2
	1041	5.66667	2.33333
	1042	4.33333	2.33333
	1043	2.66667	3.33333
	1044	3	2.66667
	1045	5.33333	3.66667
	1046	6	2.33333
	1047	7	2.66667
	1048	6	2.33333
	1049	10.3333	2.66667
	1050	11.3333	2.33333
	1051	11	1.66667
	1052	8.66667	2
	1053	9.33333	3.33333
	1054	14.3333	4.66667
	1055	16.6667	4.33333
	1056	17.6667	3.66667
	1057	13.3333	3.33333
	1058	8.33333	4
	1059	4.33333	4
	1060	2.33333	3.33333
	1061	6.66667	3
	1062	9.33333	2.66667
	1063	14	4.66667
	1064	11.3333	5.66667
	1065	10.3333	6.66667
	1066	8.33333	5
	1067	10	3.66667
	1068	12	2
	1069	12.6667	2
	1070	13	2.66667
	1071	12.6667	4
	1072	14.6667	3.33333
	1073	14.3333	3.33333
	1074	13	2.33333
	1075	12	2.66667
	1076	11.3333	1.66667
	1077	8.66667	1.33333
	1078	4.33333	3.66667
	1079	2.33333	4.33333
	1080	2.33333	4.33333
	1081	3.33333	1.33333
	1082	4	0.333333
	1083	4.33333	0.666667
	1084	3.66667	2.66667
	1085	4.66667	4
	1086	5.33333	3.33333
	1087	5.33333	2.66667
	1088	4	1.66667
	1089	5.33333	2.66667
	1090	5	1.66667
	1091	5.66667	2
	1092	3.66667	4.33333
	1093	4.33333	6.66667
	1094	4	6.66667
	1095	5	5.66667
	1096	5.33333	5
	1097	6	6.66667
	1098	5.33333	5
	1099	5	5
	1100	3	4
	1101	3	4.66667
	1102	2.33333	4.33333
	1103	3	4
	1104	2.33333	3
	1105	4.66667	2.33333
	1106	4	2
	1107	4.66667	2
	1108	4.66667	3
	1109	10.3333	5.33333
	1110	12	6
	1111	12.3333	5.33333
	1112	9.33333	3
	1113	8.66667	3.66667
	1114	8.33333	4
	1115	7.33333	4.33333
	1116	6.66667	4.66667
	1117	5.33333	5.33333
	1118	7	5.66667
	1119	10.3333	5.33333
	1120	13	5
	1121	13.6667	5
	1122	14	5
	1123	15.6667	6.33333
	1124	14.3333	8
	1125	11.3333	7.66667
	1126	9	6
	1127	9	3.66667
	1128	8.33333	3.66667
	1129	7.66667	2.66667
	1130	6.66667	4
	1131	8.33333	4.33333
	1132	13	6.66667
	1133	17	6.33333
	1134	17	6.66667
	1135	13	4.33333
	1136	11.6667	3
	1137	11.6667	2
	1138	9	5.33333
	1139	7.33333	6.33333
	1140	8.66667	5.66667
	1141	10.3333	4
	1142	9.33333	3.66667
	1143	6.33333	5
	1144	5.66667	4
	1145	5.66667	4.33333
	1146	5.66667	5
	1147	4	5.33333
	1148	3	4.66667
	1149	1.66667	4.33333
	1150	1.66667	4.33333
	1151	2	5
	1152	2.33333	4.66667
	1153	2	3.66667
	1154	1	2.66667
	1155	1.33333	1
	1156	1.33333	0.333333
	1157	1.66667	0.333333
	1158	3	1.66667
	1159	8	3
	1160	12.6667	3.66667
	1161	13.3333	3
	1162	9	2.33333
	1163	7.33333	4.33333
	1164	6	4.33333
	1165	9	5.66667
	1166	6.66667	5
	1167	7.66667	5.33333
	1168	4	5
	1169	4	4
	1170	2	5
	1171	4	5
	1172	3.66667	6.33333
	1173	4.66667	6
	1174	2.66667	4.66667
	1175	2	3.33333
	1176	1.33333	3
	1177	6.33333	3.33333
	1178	10.3333	3.33333
	1179	11.6667	3
	1180	8.33333	4.66667
	1181	4.66667	6.66667
	1182	3.33333	7.33333
	1183	2.66667	7.33333
	1184	2	5
	1185	1.33333	4.66667
	1186	1.33333	3.33333
	1187	2	3
	1188	3.33333	2
	1189	2.66667	2.66667
	1190	2	3.66667
	1191	0.333333	5
	1192	0.666667	4
	1193	0.666667	3.66667
	1194	1	4
	1195	0.666667	4.33333
	1196	2.33333	4.33333
	1197	2.66667	2.66667
	1198	2.33333	2
	1199	0.666667	1.66667
	1200	0	2
	1201	1	6
	1202	2	4.66667
	1203	3.33333	5.33333
	1204	3.66667	5.66667
	1205	4	6.66667
	1206	2.66667	6
	1207	2.33333	3.33333
	1208	2	2.33333
	1209	3.33333	1.33333
	1210	4.33333	1.66667
	1211	5.66667	2.33333
	1212	7	2.33333
	1213	7.66667	3
	1214	6	3
	1215	3.33333	3.66667
	1216	1.66667	3.33333
	1217	0.666667	4.66667
	1218	1	5.33333
	1219	1.66667	8.66667
	1220	2.33333	7.33333
	1221	5	8.66667
	1222	5	8.66667
	1223	6.33333	11
	1224	6.33333	8.33333
	1225	6.66667	6.66667
	1226	4.66667	5.33333
	1227	1.33333	6.33333
	1228	0.333333	7.66667
	1229	0.333333	7.33333
	1230	0.333333	8.33333
	1231	0	7.66667
	1232	0.333333	10
	1233	0.666667	12.3333
	1234	0.666667	12
	1235	0.333333	9.66667
	1236	0	8.66667
	1237	0	9.66667
	1238	0	10.3333
	1239	0	9.66667
	1240	0	8.66667
	1241	0	6.33333
	1242	0.333333	5.66667
	1243	0.666667	4.33333
	1244	1	7.66667
	1245	0.666667	7
	1246	0.666667	7.33333
	1247	1	4
	1248	1	3
	1249	0.666667	3
	1250	0	5.33333
	1251	0	6
	1252	0.333333	8.66667
	1253	0.333333	8.66667
	1254	0.666667	9.66667
	1255	0.333333	6
	1256	0.333333	6.33333
	1257	0	8
	1258	0	9
	1259	0.333333	6.33333
	1260	0.333333	3
	1261	0.333333	3.66667
	1262	0	5.33333
	1263	0	6.66667
	1264	0	6
	1265	0	4.66667
	1266	0	3.33333
	1267	0	3.33333
	1268	0	5
	1269	0	5.66667
	1270	0	4.33333
	1271	0	3
	1272	0	2.66667
	1273	0	4.66667
	1274	0	4
	1275	0	3
	1276	0	0.666667
	1277	0	3
	1278	0	4
	1279	0	6.33333
	1280	0	4.66667
	1281	0	4.66667
	1282	0	4.66667
	1283	0	6.66667
	1284	0	9
	1285	0.333333	9.33333
	1286	0.333333	9.33333
	1287	0.333333	7.33333
	1288	0.333333	6.33333
	1289	0.333333	4.66667
	1290	1	3.66667
	1291	0.666667	4.66667
	1292	1	5
	1293	0.666667	5
	1294	1	4
	1295	1.33333	3.33333
	1296	1.33333	4.66667
	1297	1	4.33333
	1298	0.333333	5
	1299	0	3.33333
	1300	0	2.33333
	1301	0.333333	2.66667
	1302	1.66667	4.33333
	1303	4.33333	6.33333
	1304	6.66667	6.66667
	1305	6.33333	6.33333
	1306	4.66667	8
	1307	2.66667	8.66667
	1308	2.33333	10.3333
	1309	2	8.66667
	1310	1.66667	8.33333
	1311	2.33333	8.66667
	1312	2.66667	8
	1313	3.66667	8
	1314	3.33333	7
	1315	3.33333	6.66667
	1316	3.66667	6
	1317	3.33333	6
	1318	3.33333	8.33333
	1319	2	7.66667
	1320	3	6.66667
	1321	2	5
	1322	2	5
	1323	0.333333	5.33333
	1324	1.33333	4.33333
	1325	2	4.33333
	1326	3.33333	4
	1327	4.66667	4
	1328	5.66667	2.66667
	1329	5.33333	2
	1330	3.66667	3.66667
	1331	4.66667	5
	1332	5.33333	4.66667
	1333	6	2
	1334	3	0.666667
	1335	2	2.33333
	1336	0.666667	3.66667
	1337	2	5.33333
	1338	1.33333	3.66667
	1339	1.33333	4
	1340	0	2.33333
	1341	0.333333	1.66667
	1342	0.333333	1
	1343	1	3.33333
	1344	1.66667	6.33333
	1345	3.66667	7.33333
	1346	4.66667	7.66667
	1347	7	6.33333
	1348	5.66667	6.33333
	1349	4	6.66667
	1350	0.666667	7.66667
	1351	2	8
	1352	2.66667	6.66667
	1353	3	5.33333
	1354	1.66667	4.33333
	1355	3.33333	4.33333
	1356	6.33333	6
	1357	6	6
	1358	3.66667	6.33333
	1359	0.333333	6
	1360	0	7.33333
	1361	0	9
	1362	0	7.66667
	1363	0.333333	7.66667
	1364	0.333333	5.66667
	1365	1	6.66667
	1366	0.666667	5.66667
	1367	1	5.33333
	1368	1	4.33333
	1369	1.33333	4.33333
	1370	1	4.33333
	1371	0.333333	4.33333
	1372	0.666667	4.33333
	1373	0.666667	5.66667
	1374	1.33333	5.66667
	1375	1	5
	1376	1	2.66667
	1377	1	3
	1378	1.33333	2.66667
	1379	2	2.66667
	1380	1.33333	2.66667
	1381	1	3.66667
	1382	0.333333	6
	1383	0.333333	5
	1384	0.333333	4.33333
	1385	0.333333	2.33333
	1386	0.333333	3
	1387	0	4
	1388	0	4.66667
	1389	0	5.33333
	1390	0	4.66667
	1391	0	5
	1392	1.33333	4.66667
	1393	2	5
	1394	3.33333	6.66667
	1395	5	6.66667
	1396	7.66667	5.66667
	1397	6.66667	3.66667
	1398	4	3
	1399	1	4
	1400	1	4.33333
	1401	2	5
	1402	2.66667	4.66667
	1403	2.33333	4.33333
	1404	1	5.33333
	1405	0	6
	1406	0	6.66667
	1407	0	5.33333
	1408	0.333333	3.66667
	1409	0.666667	3
	1410	1.33333	2
	1411	1.33333	3.33333
	1412	1	3.33333
	1413	1	4
	1414	2.66667	4.66667
	1415	4.33333	6
	1416	4.33333	6.33333
	1417	4	5.66667
	1418	2.33333	6
	1419	2	6
	1420	0.333333	6.66667
	1421	1	5.66667
	1422	1.66667	5.66667
	1423	3	6
	1424	3.66667	4.66667
	1425	2.66667	5.66667
	1426	1.33333	5.66667
	1427	0.333333	7
	1428	0.333333	6.66667
	1429	0.666667	4.66667
	1430	1.66667	3.66667
	1431	2	1.66667
	1432	1.66667	1.66667
	1433	0.666667	1.66667
	1434	1	2.33333
	1435	2.66667	3.33333
	1436	3.33333	4.33333
	1437	2.66667	5.66667
	1438	1	5
	1439	0.333333	3.66667
	1440	1.66667	2.33333
	1441	2.33333	2.66667
	1442	2	4
	1443	1	4.33333
	1444	0.666667	3.33333
	1445	1.66667	2.33333
	1446	2	2.66667
	1447	1.66667	2.66667
	1448	0.666667	2.66667
	1449	0.333333	1.33333
	1450	0.333333	2
	1451	0.333333	2.66667
	1452	0	3.33333
	1453	0	3.33333
	1454	1	2.66667
	1455	1.33333	3
	1456	3	3.66667
	1457	3.33333	3.66667
	1458	4.33333	4.66667
	1459	3.66667	5.66667
	1460	3	6
	1461	2	6
	1462	1.33333	6
	1463	1.33333	7
	1464	2	6
	1465	2	4.33333
	1466	4.33333	5.66667
	1467	4.66667	7
	1468	6.33333	6.33333
	1469	3.33333	2.66667
	1470	2.33333	1
	1471	1.33333	1.33333
	1472	3.33333	1.66667
	1473	3	1.66667
	1474	2.33333	2
	1475	1	4.66667
	1476	1.33333	5.66667
	1477	1.66667	6.33333
	1478	2	6
	1479	2.33333	5.33333
	1480	1.66667	5.33333
	1481	0.666667	4
	1482	0	3.66667
	1483	0.666667	4.33333
	1484	1.33333	5
	1485	2	6
	1486	2.66667	3.66667
	1487	2.33333	3
	1488	2.33333	2.66667
	1489	1.33333	4
	1490	1.33333	3
	1491	0.666667	2.66667
	1492	1	2
	1493	3	3
	1494	3.66667	2.33333
	1495	3.33333	2.66667
	1496	2	3
	1497	2.33333	3.66667
	1498	2.66667	5
	1499	2	5.33333
	1500	1	7.66667
	1501	0.666667	6
	1502	0.666667	6.66667
	1503	0.666667	4.33333
	1504	2.66667	5
	1505	4	3.66667
	1506	4	3
	1507	3.33333	3
	1508	1.66667	2.66667
	1509	2.33333	2.66667
	1510	1	3.66667
	1511	1	4
	1512	1.33333	4.66667
	1513	1	4
	1514	1.33333	4.33333
	1515	0.333333	4.66667
	1516	0.666667	4
	1517	0.333333	3
	1518	0.333333	2.66667
	1519	0	2
	1520	0	3
	1521	1	2.33333
	1522	1.66667	2.66667
	1523	2	3.33333
	1524	1.33333	5.33333
	1525	0.666667	5.33333
	1526	0.666667	5
	1527	0.333333	3.33333
	1528	0.333333	4
	1529	0.333333	3.66667
	1530	2.33333	4.33333
	1531	2.66667	3.33333
	1532	4	2.33333
	1533	3.33333	3.33333
	1534	3	3.33333
	1535	1.33333	3.33333
	1536	0	2
	1537	0	2.33333
	1538	0	2.66667
	1539	0.666667	3.33333
	1540	1.33333	4.33333
	1541	2.66667	5
	1542	2.33333	4.33333
	1543	2.33333	4
	1544	1.33333	3
	1545	1.66667	3.33333
	1546	2.33333	4
	1547	2.33333	4
	1548	2.33333	3
	1549	1.66667	1.33333
	1550	2.33333	2
	1551	3	2
	1552	3.66667	2
	1553	5.33333	1
	1554	6.66667	1
	1555	5.66667	1.33333
	1556	3.66667	1.66667
	1557	2.33333	2
	1558	2.66667	2.66667
	1559	4.66667	4
	1560	5.33333	4.33333
	1561	5.33333	5
	1562	5.66667	6.33333
	1563	6	9.33333
	1564	8	9.33333
	1565	7	7.66667
	1566	8	4
	1567	7.66667	2.33333
	1568	8.33333	2.33333
	1569	7	2.66667
	1570	5.66667	3
	1571	5.33333	3
	1572	5.33333	4
	1573	6.66667	5
	1574	6.33333	4.33333
	1575	6.66667	5
	1576	7	6.33333
	1577	5	8.66667
	1578	5.33333	7
	1579	4	5
	1580	6.66667	2.66667
	1581	5.33333	3
	1582	5.66667	2.66667
	1583	3.33333	2.33333
	1584	2.66667	2
	1585	1	4
	1586	1.66667	5.66667
	1587	1.33333	6.33333
	1588	1.66667	4.33333
	1589	1.66667	3
	1590	2.66667	4
	1591	4.33333	5.66667
	1592	5.33333	5.66667
	1593	6.33333	4.66667
	1594	6.33333	3.33333
	1595	5	2.66667
	1596	3	2
	1597	2	1.33333
	1598	1.33333	1
	1599	1	0.333333
	1600	0	0
	1601	1.33333	0.666667
	1602	2	1.33333
	1603	2.66667	2
	1604	1.33333	2.66667
	1605	1.66667	3
	1606	1.33333	3
	1607	2.33333	3.33333
	1608	1.66667	3.66667
	1609	2	4
	1610	1.66667	2.66667
	1611	2	2.66667
	1612	1.66667	2
	1613	1.33333	2
	1614	2.66667	1
	1615	3.33333	1.33333
	1616	3.33333	1.33333
	1617	1.66667	3
	1618	1.33333	3.33333
	1619	4	3.33333
	1620	7.66667	1.66667
	1621	9	1.66667
	1622	9	2.66667
	1623	7.33333	2.66667
	1624	7	3
	1625	5	2.66667
	1626	4.66667	3
	1627	3.66667	3
	1628	5.33333	3
	1629	4.66667	3.66667
	1630	6.33333	5.66667
	1631	7.33333	9.33333
	1632	7.66667	12
	1633	9	11.6667
	1634	8	8.33333
	1635	7.66667	8
	1636	5.33333	7.33333
	1637	4.66667	8.33333
	1638	4.33333	6.66667
	1639	4.66667	5.66667
	1640	4	4
	1641	3.66667	3.33333
	1642	4.66667	4.33333
	1643	5	6.33333
	1644	6.66667	6
	1645	6.66667	5
	1646	7.33333	2.66667
	1647	7	3.66667
	1648	5	2.66667
	1649	3.33333	3.33333
	1650	3	2
	1651	4.33333	3
	1652	3.66667	2.66667
	1653	2	4.33333
	1654	0	5.33333
	1655	0.333333	5.66667
	1656	0.666667	4
	1657	0.666667	2.66667
	1658	0.333333	3.66667
	1659	0	4
	1660	0	4
	1661	0.333333	2
	1662	2.66667	1
	1663	3.33333	1
	1664	3.66667	1.33333
	1665	2.33333	1.66667
	1666	2	1
	1667	1.33333	1.66667
	1668	0.333333	3
	1669	0.666667	3
	1670	1.33333	3.33333
	1671	1.66667	4
	1672	1	4.66667
	1673	1	5
	1674	1.33333	3.33333
	1675	1.33333	3
	1676	1	2
	1677	2	2
	1678	3.33333	2
	1679	5	2
	1680	4	2.66667
	1681	3.33333	3.66667
	1682	2	3.66667
	1683	2.66667	3.33333
	1684	2.33333	3.33333
	1685	1.66667	3
	1686	0.666667	2.33333
	1687	2	0.666667
	1688	4.66667	1
	1689	7.33333	2
	1690	6.66667	3
	1691	4.33333	2.66667
	1692	2	2
	1693	1.66667	1.33333
	1694	1.66667	1.33333
	1695	1.33333	1.66667
	1696	2	2.33333
	1697	3.33333	2.66667
	1698	5.33333	2
	1699	5.66667	2
	1700	5.33333	2.66667
	1701	3	3
	1702	2	2.33333
	1703	1	2.33333
	1704	1.33333	2.66667
	1705	0.666667	3
	1706	0.333333	2
	1707	0	3
	1708	0	3.66667
	1709	0	3.66667
	1710	1	2.66667
	1711	1.66667	1.66667
	1712	1.66667	1.66667
	1713	1.33333	1
	1714	2.33333	2.66667
	1715	6	3.33333
	1716	6.33333	4
	1717	6.66667	2.33333
	1718	5.33333	2
	1719	6.33333	1.66667
	1720	5.33333	3.33333
	1721	3.66667	4
	1722	3.33333	3.66667
	1723	3.33333	2.66667
	1724	3	2.66667
	1725	1.66667	3
	1726	2	3
	1727	3.33333	3.33333
	1728	5	4.33333
	1729	5	5
	1730	5	5.33333
	1731	4	5
	1732	3.66667	4.33333
	1733	2	3
	1734	1	1.66667
	1735	1	1.33333
	1736	2.33333	1.33333
	1737	3	2
	1738	2.33333	2.33333
	1739	1.33333	2
	1740	1.66667	2.33333
	1741	3.33333	2.66667
	1742	3	2.66667
	1743	2	3.66667
	1744	1	3.33333
	1745	3.33333	3.66667
	1746	6.33333	2
	1747	5.66667	2.33333
	1748	3.66667	2.66667
	1749	2	3.33333
	1750	2.33333	2.66667
	1751	2.66667	1.66667
	1752	1.33333	0.666667
	1753	1	0
	1754	1.33333	1
	1755	2	2
	1756	1.66667	3.33333
	1757	0.666667	3.66667
	1758	0.666667	3.33333
	1759	2	2.33333
	1760	3	2
	1761	3.33333	2.33333
	1762	3.66667	4.33333
	1763	3.33333	3.33333
	1764	4	2.66667
	1765	3	0.333333
	1766	3.33333	0.666667
	1767	2	1.33333
	1768	3	2
	1769	2.33333	3
	1770	2.66667	3
	1771	1.66667	3.66667
	1772	1.66667	3
	1773	2.33333	2.33333
	1774	2.33333	1.66667
	1775	2.66667	1
	1776	2.33333	1.33333
	1777	2	2
	1778	2	2.66667
	1779	1.33333	2
	1780	1.66667	1.33333
	1781	2	2
	1782	2.33333	2.66667
	1783	1.66667	4
	1784	1.66667	4
	1785	2.66667	3.33333
	1786	2.66667	2
	1787	2.33333	1
	1788	1.33333	1.66667
	1789	1.33333	2.33333
	1790	0.666667	2
	1791	0	2.33333
	1792	2	2.33333
	1793	4	2.66667
	1794	5	2.66667
	1795	5	2
	1796	4	3.66667
	1797	4.66667	5.33333
	1798	4.33333	7
	1799	4	6.66667
	1800	3.5	6
