# Supplementary material for: Suppressed prefrontal neuronal firing variability and impaired social representation in IRSp53-mutant mice
Source: eLife. 2022 Nov 1;11:e74998. doi: 10.7554/eLife.74998 (PMC9662818; doi:10.7554/eLife.74998)
Supplement: Figure 6—figure supplement 1—source data 1. — The excel file contains the numerical data used to generate Figure 6—figure supplement 1A–E. [file elife-74998-fig6-figsupp1-data1.xlsx]

## Sheet: Fig6_S1
	Fig 6_S1A	Burst proportion (%)												Fig 6_S1B	Burst proportion (%)												Fig 6_S1C	Burst proportion (%)												Fig 6_S1D	Burst proportion (%)
	WT						KO							WT						KO							WT						KO							WT						KO
	5	10	15	20	25	30	5	10	15	20	25	30		5	10	15	20	25	30	5	10	15	20	25	30		5	10	15	20	25	30	5	10	15	20	25	30		5	10	15	20	25	30	5	10	15	20
	1.34228	2.68456	3.3557	6.04027	6.04027	6.04027	0	0	0.593472	1.78042	4.1543	5.04451		0	4.74308	8.3004	9.48617	10.2767	10.2767	0	0.603318	0.904977	1.20664	3.01659	3.92157		0.486618	2.43309	5.83942	6.81265	7.29927	8.75912	0.4158	0.831601	2.4948	2.9106	4.3659	5.61331		0	4.74308	8.3004	9.48617	10.2767	10.2767	0	0.603318	0.904977	1.20664
	3.64414	11.018	26.3302	41.5569	54.2344	64.0719	0	0	2.8436	2.8436	3.79147	3.79147		1.5083	7.11219	19.7587	32.2659	42.65	51.5373	0	0.652529	2.28385	5.0571	5.54649	5.87276		2.30203	8.62492	22.0892	37.7328	48.9871	57.6223	0	0.4329	1.2987	1.7316	2.1645	3.0303		1.5083	7.11219	19.7587	32.2659	42.65	51.5373	0	0.652529	2.28385	5.0571
	1.88679	3.77358	5.66038	5.66038	7.54717	7.54717	0	0.621504	2.98322	5.46924	8.94966	12.6165		0.729927	4.0146	6.11314	7.11679	8.39416	11.0401	0.0617093	0.617093	2.96205	4.16538	6.57205	10.2438		1.50792	7.21287	13.0435	17.4164	22.2669	26.7404	0	0.166113	0.581395	1.41196	2.40864	3.32226		0.729927	4.0146	6.11314	7.11679	8.39416	11.0401	0.0617093	0.617093	2.96205	4.16538
	0	2.91942	14.5387	29.1359	43.1296	55.1382	0.110314	1.59956	4.2471	5.68119	7.61169	9.70767		0	1.1396	5.08072	10.2089	14.8148	18.471	0.243902	0.243902	0.487805	0.487805	0.487805	0.731707		0	1.95026	8.87458	18.0175	26.4448	34.55	0	0.255428	0.255428	0.83014	1.21328	1.341		0	1.1396	5.08072	10.2089	14.8148	18.471	0.243902	0.243902	0.487805	0.487805
	0	1.0582	1.5873	2.1164	2.1164	2.6455	0.379507	0.56926	1.80266	3.60531	5.97723	9.01328		0	0.75188	2.30934	3.92052	6.55209	8.70032	0	0	0.404858	1.01215	3.64372	6.2753		0	0.472069	2.98977	5.50747	7.08104	10.2282	0.40201	1.00503	1.40704	2.01005	4.52261	7.43719		0	0.75188	2.30934	3.92052	6.55209	8.70032	0	0	0.404858	1.01215
	0.476758	5.00596	11.4422	17.8784	23.1228	27.056	0.214362	0.428725	1.28617	2.57235	4.50161	8.46731		0.603622	8.71898	16.9685	24.9832	30.9188	37.0557	0.11274	0.338219	1.63472	2.87486	5.18602	7.32807		0.840336	6.46008	13.9706	18.6975	22.4265	26.4181	0.249066	0.622665	2.05479	4.48319	5.97758	8.21918		0.603622	8.71898	16.9685	24.9832	30.9188	37.0557	0.11274	0.338219	1.63472	2.87486
	0	0.695652	2.6087	3.65217	5.21739	6.43478	0	1.91388	5.86124	11.1244	15.4306	19.4976		0.617284	3.39506	6.79012	8.95062	10.8025	11.4198	0	1.72239	3.44478	4.55927	7.29483	10.4357		0	3.69487	5.84029	9.41597	11.5614	12.6341	0	1.68612	2.85344	3.63165	4.79896	5.83658		0.617284	3.39506	6.79012	8.95062	10.8025	11.4198	0	1.72239	3.44478	4.55927
	0	1.3683	3.6488	5.9293	7.63968	10.6043	0	0	0	0	0	0		0	0	0	1.5748	3.14961	4.72441	0	0.887574	0.887574	1.0355	1.47929	2.36686		0.209205	2.71967	4.91632	6.90377	9.30962	11.1925	0	0	0	0	0	0.546448		0	0	0	1.5748	3.14961	4.72441	0	0.887574	0.887574	1.0355
	0.148699	2.23048	7.2119	11.4498	15.0929	18.4387	0.594732	3.20023	7.41999	14.84	23.9592	31.9173		0.335383	3.24203	7.49022	10.9558	14.142	16.7132	0.0680619	1.63349	3.91356	7.65697	12.8127	18.8021		0.538539	3.29855	8.11175	13.2279	18.0411	22.1811	0.0339443	1.45961	4.70129	10.2172	16.4291	22.9294		0.335383	3.24203	7.49022	10.9558	14.142	16.7132	0.0680619	1.63349	3.91356	7.65697
	0	0	0	0	0	0	0	0.610998	4.58248	9.16497	15.7841	20.4684		0	2.04842	6.70391	10.2421	13.2216	13.9665	0	0	3.7037	5.55556	5.55556	5.55556		0	1.21212	1.21212	5.45455	6.66667	7.87879	0	0.980392	2.06972	3.26797	4.79303	6.10022		0	2.04842	6.70391	10.2421	13.2216	13.9665	0	0	3.7037	5.55556
	0	0	0.395778	1.71504	2.63852	3.95778	0	0	0	0.429185	1.28755	2.57511		0	0	0.495663	1.11524	2.23048	3.22181	0.154178	1.5572	5.70459	12.8122	22.0937	30.7431		0	0	0	0	2.29226	2.29226	0.0784724	1.32095	6.47397	16.4269	27.583	38.3207		0	0	0.495663	1.11524	2.23048	3.22181	0.154178	1.5572	5.70459	12.8122
	0	0	0	0	0	0	0	2.24719	4.49438	4.49438	8.98876	11.236		0.503778	0.755668	2.77078	4.28212	5.28967	7.30479	1.01266	2.40506	3.67089	5.31646	7.08861	10.3797		0.14782	2.14339	5.32151	9.12786	11.6408	15.2254	0.733945	1.46789	2.56881	3.85321	5.68807	6.42202		0.503778	0.755668	2.77078	4.28212	5.28967	7.30479	1.01266	2.40506	3.67089	5.31646
	0	0	1.02302	2.04604	2.55754	3.06905	1.42558	4.57023	8.25996	12.6205	17.3585	22.8512		0	1.37931	2.98851	5.28736	6.66667	7.81609	1.73847	4.258	6.95389	10.9095	15.6715	19.2492		0	0	0	2.20994	2.76243	4.41989	2.08036	4.48705	8.64777	14.5625	20.5588	26.3716		0	1.37931	2.98851	5.28736	6.66667	7.81609	1.73847	4.258	6.95389	10.9095
	0	1.06707	3.04878	3.81098	5.18293	7.31707	0.913838	1.95822	3.13316	4.69974	6.72324	8.68146		0.138408	2.28374	3.46021	4.84429	6.22837	7.40484	0.752587	1.45814	3.29257	5.22107	6.91439	8.74882		0.230681	0.230681	0.230681	1.38408	3.34487	3.92157	0.503356	1.67785	2.68456	3.94295	6.08221	9.10235		0.138408	2.28374	3.46021	4.84429	6.22837	7.40484	0.752587	1.45814	3.29257	5.22107
	1.36054	2.72109	3.40136	4.08163	4.7619	5.44218	0	1.4245	5.69801	8.83191	12.2507	15.5271		0.193892	1.2603	3.53854	6.4954	9.30683	12.9423	0	2.63897	8.19764	13.3633	17.6305	20.1011		0.216216	1.18919	2.59459	5.24324	8.21622	11.4054	0	3.24138	7.65517	11.8621	16	19.4483		0.193892	1.2603	3.53854	6.4954	9.30683	12.9423	0	2.63897	8.19764	13.3633
	0.179856	5.66547	16.3219	25.8543	34.6673	39.6583	0	4.65116	4.65116	4.65116	4.65116	4.65116		0.95498	2.79673	7.19645	12.7217	17.8718	21.6917	0	5.52632	10	11.5789	13.9474	14.7368		0.879121	3.04553	7.47253	12.2449	16.4521	20.2826	0	0	1.84332	5.52995	7.37327	8.29493		0.95498	2.79673	7.19645	12.7217	17.8718	21.6917	0	5.52632	10	11.5789
	0.30776	8.41943	22.8402	36.4476	47.1752	56.408	0.231481	0.694444	2.5463	4.62963	7.63889	9.72222		0.746849	9.81796	22.5144	33.8572	42.337	49.9922	0.230415	2.18894	4.60829	7.7957	11.7127	16.129		0.322061	7.90392	20.3435	32.2732	41.8411	49.6645	0.194932	1.07212	2.72904	5.94542	8.18713	11.5984		0.746849	9.81796	22.5144	33.8572	42.337	49.9922	0.230415	2.18894	4.60829	7.7957
	0.232829	0.698487	4.42375	5.58789	7.91618	9.31315	0	0	0.3996	0.799201	0.999001	1.1988		0.503778	1.51134	3.61041	5.20571	7.13686	8.73216	0.407424	1.0412	1.81077	2.67089	2.98778	4.75328		0.683761	1.7094	4.2735	7.17949	8.03419	9.23077	0	0.386548	0.850406	1.54619	2.16467	3.71086		0.503778	1.51134	3.61041	5.20571	7.13686	8.73216	0.407424	1.0412	1.81077	2.67089
	0	0.858369	0.858369	0.858369	1.71674	1.71674	0.305344	2.74809	7.78626	14.1221	20	23.5115		0.357143	0.714286	1.42857	1.42857	1.78571	1.78571	0	1.99492	6.92782	10.8089	15.2339	18.2445		0.400802	1.2024	2.20441	3.80762	4.20842	4.60922	0.137268	1.50995	4.80439	7.61839	10.5697	13.4523		0.357143	0.714286	1.42857	1.42857	1.78571	1.78571	0	1.99492	6.92782	10.8089
	0	0	0	0	0	4.87805	0	8.47458	22.0339	23.7288	25.4237	27.1186		0	0	0.689655	2.75862	3.44828	4.82759	0	3.75335	11.5282	16.622	20.3753	23.3244		0	1.70157	3.79581	6.28272	7.59162	9.81675	0	6.01002	16.0267	20.8681	25.2087	28.5476		0	0	0.689655	2.75862	3.44828	4.82759	0	3.75335	11.5282	16.622
	0	0	0	0	0	50	0.606673	6.26896	11.9312	17.4924	21.7391	26.8959		0	2.2113	5.40541	7.12531	8.59951	10.3194	0.0627353	2.79172	8.03011	15.6524	23.212	31.3049		0.598802	3.29341	8.38323	9.58084	10.479	10.7784	0.26729	2.03809	6.44838	12.2619	18.9108	26.4617		0	2.2113	5.40541	7.12531	8.59951	10.3194	0.0627353	2.79172	8.03011	15.6524
	0.460005	8.12676	19.2435	30.1814	39.3815	47.3294	0	3.89972	10.8635	14.4847	16.9916	17.5487		0.984737	6.03972	16.002	26.0791	35.352	43.4433	0	8.66426	20.5776	23.8267	27.0758	29.9639		1.14399	7.70287	17.3276	27.4253	37.0653	45.241	0	1.30719	3.92157	7.51634	8.49673	10.4575		0.984737	6.03972	16.002	26.0791	35.352	43.4433	0	8.66426	20.5776	23.8267
	0	0	0	2.0202	4.0404	4.0404	3.09278	19.0722	28.866	33.5052	38.1443	40.2062		0	0	0	0.869565	1.73913	1.73913	4.27807	30.6595	44.0285	47.9501	53.8324	56.6845		0	0	0.475059	0.950119	1.90024	2.85036	4.85876	35.3672	46.5537	52.3164	55.9322	58.6441		0	0	0	0.869565	1.73913	1.73913	4.27807	30.6595	44.0285	47.9501
	0	1.50376	3.7594	6.01504	7.5188	7.5188	0	0	2.85714	5.71429	11.4286	11.4286		0.593472	1.18694	4.1543	5.63798	7.12166	10.6825	0	0.676819	4.06091	8.29103	13.0288	18.7817		0	0	0.735294	2.20588	3.67647	3.67647	0	1.59046	6.95825	11.9284	17.0974	21.67		0.593472	1.18694	4.1543	5.63798	7.12166	10.6825	0	0.676819	4.06091	8.29103
	0	0	0	2.74443	4.45969	7.7187	0.469484	0.938967	0.938967	4.22535	7.98122	14.554		0	0	0.791035	3.49374	9.7561	16.9413	0.654664	0.981997	1.63666	3.60065	6.05565	12.275		0	0	0.725295	4.17044	10.0181	15.6392	0	1.43266	3.86819	8.73926	13.6103	19.341		0	0	0.791035	3.49374	9.7561	16.9413	0.654664	0.981997	1.63666	3.60065
	0	0.788955	4.14201	6.90335	7.69231	8.6785	0	4.5398	12.4378	20.5224	29.7886	36.1318		0.100637	2.2308	7.32976	14.7266	22.526	30.4596	0	2.77569	6.45161	9.37734	12.3031	15.4539		0.0348554	1.69048	5.76856	12.2691	18.4908	25.6013	0.2	2.7	5.3	7.3	10.2	12.8		0.100637	2.2308	7.32976	14.7266	22.526	30.4596	0	2.77569	6.45161	9.37734
	0	1.49813	4.41948	8.76404	12.7341	16.779	0.641026	1.76282	2.24359	5.60897	8.49359	10.2564		0	1.23726	5.27656	9.82533	15.8661	21.1426	0	1.29776	3.38861	7.4261	10.2379	13.987		0	0.619195	5.0774	9.5356	14.3653	17.5851	0.757002	4.54201	8.02422	11.5064	12.869	15.7456		0	1.23726	5.27656	9.82533	15.8661	21.1426	0	1.29776	3.38861	7.4261
	0.11274	0.11274	1.46561	4.79143	8.28636	12.1759	2.29885	6.89655	9.1954	11.4943	13.7931	13.7931		0.0398486	0.677426	3.30743	9.28472	15.78	24.4073	0	1.55521	8.70918	13.8414	18.6625	20.2177		0.0401768	0.160707	1.82804	6.32784	12.8566	20.2893	0	3.66089	8.47784	11.5607	15.2216	18.8825		0.0398486	0.677426	3.30743	9.28472	15.78	24.4073	0	1.55521	8.70918	13.8414
	0.139243	0.25528	1.6013	4.20051	9.09724	15.34	0	2.5974	5.84416	9.74026	12.3377	20.1299		0.215895	0.647686	2.30738	6.30144	12.1576	18.567	0	0.47619	7.38095	13.8095	17.619	21.1905		0.0242189	0.605473	3.81448	10.5837	18.1158	28.1303	0	0.873362	2.62009	7.42358	9.60699	9.60699		0.215895	0.647686	2.30738	6.30144	12.1576	18.567	0	0.47619	7.38095	13.8095
	0	0	2.82051	3.84615	6.28205	8.07692	0	0.944947	2.54725	5.75185	10.2301	14.5029		0.630915	1.26183	3.09148	6.11987	9.21136	11.041	0	2.03666	7.04102	13.7038	22.1123	29.8225		0.453172	1.81269	3.02115	5.13595	6.571	8.76133	0	1.56495	4.78873	10.0156	17.5587	23.662		0.630915	1.26183	3.09148	6.11987	9.21136	11.041	0	2.03666	7.04102	13.7038
	0.692042	1.38408	2.07612	3.34487	4.26759	6.51672	0	1.15911	4.89989	9.37829	15.2266	19.6523		0.591966	1.18393	1.7759	2.66385	4.69345	6.46934	0.309598	5.26316	8.97833	10.9907	14.2415	16.2539		0.308452	0.801974	1.69648	3.23874	5.45959	8.9451	0.542005	2.16802	2.16802	4.33604	5.96206	7.31707		0.591966	1.18393	1.7759	2.66385	4.69345	6.46934	0.309598	5.26316	8.97833	10.9907
	0.794439	1.88679	3.42602	5.31281	7.49752	11.5194	0	0	0	0	0.928793	2.16718		0.693481	1.66436	2.49653	3.91817	5.85992	8.56449	0	0	0	0	0	0.973236		0.457012	1.14253	2.28506	4.34162	6.39817	9.91145	0.409836	0.409836	0.409836	0.409836	0.819672	0.819672		0.693481	1.66436	2.49653	3.91817	5.85992	8.56449	0	0	0	0
	0	0	0	0	0	0	6.10687	47.3282	55.7252	58.7786	59.542	59.542		0	0.550964	1.10193	2.20386	2.47934	4.13223	3.02572	32.0726	49.0166	59.9092	65.8094	70.348		0	0	0.557103	0.557103	1.11421	1.67131	0.275103	29.5736	51.1692	59.0096	63.9615	67.6754		0	0.550964	1.10193	2.20386	2.47934	4.13223	3.02572	32.0726	49.0166	59.9092
	0	0	0	0	0	0	0	4.65116	9.30233	9.30233	17.4419	19.7674		0	0.263852	0.527704	0.527704	0.527704	0.791557	0	4.50331	9.93377	16.2914	21.457	25.9603		0	0.260417	0.260417	0.260417	0.260417	0.260417	0	1.98413	6.34921	12.1032	17.4603	21.0317		0	0.263852	0.527704	0.527704	0.527704	0.791557	0	4.50331	9.93377	16.2914
	0	1.01523	1.01523	1.01523	1.01523	1.01523	0	5.37757	9.7254	13.8444	16.5904	18.4211		0.283286	0.849858	1.41643	1.84136	2.69122	3.68272	0	1.60772	4.87674	7.07395	10.7181	13.8264		0	0	0	0	0	1.26582	0	2.14348	6.29921	10.3675	14.217	17.0166		0.283286	0.849858	1.41643	1.84136	2.69122	3.68272	0	1.60772	4.87674	7.07395
	0	0.974421	3.04507	5.48112	9.3179	13.9464	4.21496	12.4341	26.5543	34.7734	40.1475	42.9926		0	1.6	3.46667	5.6	8.4	10	5.95745	12.0567	20.1418	23.8298	27.3759	30.2128		0.323625	0.323625	0.647249	1.2945	1.61812	4.36893	9.61538	17.9901	25.2481	31.0174	35.1117	39.1439		0	1.6	3.46667	5.6	8.4	10	5.95745	12.0567	20.1418	23.8298
	0	1.26582	6.32911	10.1266	13.2911	20.2532	0.643915	2.51127	4.37862	7.53381	9.91629	12.0412		0	5.15222	13.3489	20.1405	26.2295	31.3817	3.09648	6.87744	9.71317	13.0378	16.3299	21.1213		0	2.92826	7.17423	12.5915	16.5447	22.9868	0.954261	3.45508	5.75847	8.48963	12.1422	15.4327		0	5.15222	13.3489	20.1405	26.2295	31.3817	3.09648	6.87744	9.71317	13.0378
	0	0	3.33333	6.66667	6.66667	6.66667	0	0.896057	5.64516	10.3943	15.3226	17.3835		0	1.31752	4.87484	9.22266	11.4625	12.6482	0	0	0.363636	1	1.63636	3.45455		0	1.69492	3.38983	3.38983	5.08475	5.08475	0	0	1.04712	1.57068	3.14136	3.14136		0	1.31752	4.87484	9.22266	11.4625	12.6482	0	0	0.363636	1
	0	1.19403	2.98507	5.37313	7.16418	8.35821	0	3.10078	9.30233	10.8527	12.4031	12.4031		0	2	4.83333	7.33333	9.83333	11.3333	1.22699	4.90798	7.97546	13.4969	15.3374	17.7914		0.75188	1.8797	3.38346	8.27068	8.27068	9.77444	0	13	18.5	21.5	21.5	24		0	2	4.83333	7.33333	9.83333	11.3333	1.22699	4.90798	7.97546	13.4969
	0.550459	1.65138	5.22936	8.99083	13.8532	18.0734	0	0	0	0	0	0		0.808625	4.38005	8.01887	11.7251	15.566	18.2615	0	0	0	0	0	0		0.608643	3.16494	8.15581	11.1382	14.1814	16.7377	0	0	0	0	0	0		0.808625	4.38005	8.01887	11.7251	15.566	18.2615	0	0	0	0
	0.26178	1.96335	6.21728	9.42408	14.3325	18.4555	0	0	2.15983	3.88769	6.04752	6.91145		0.322234	3.43716	7.46509	10.3652	14.1246	16.971	0.528634	1.76211	3.0837	4.40529	6.1674	6.43172		0.387785	3.29617	7.65875	12.0698	16.8202	20.1163	0	0.991254	1.51603	3.61516	4.5481	4.89796		0.322234	3.43716	7.46509	10.3652	14.1246	16.971	0.528634	1.76211	3.0837	4.40529
	1.07775	5.2348	9.31486	12.933	18.1678	22.0169	0.274048	6.44012	15.3741	23.5407	33.6257	41.7375		1.34228	7.72969	15.066	23.5825	30.5022	35.9176	0.564175	4.37236	9.96709	15.4678	18.7118	22.0028		1.55524	8.52699	17.9836	26.8859	34.7336	41.6696	0.259811	5.23725	12.8401	21.3319	29.7552	37.3581		1.34228	7.72969	15.066	23.5825	30.5022	35.9176	0.564175	4.37236	9.96709	15.4678
	0.393701	1.9685	5.11811	6.69291	9.05512	10.8268	0	5.09434	19.2453	23.9623	29.6226	32.4528		0	2.71647	7.30051	9.67742	11.545	14.7708	0.106838	7.63889	24.7863	36.8056	44.7115	51.8697		0.159363	2.70916	7.01195	11.0757	14.9004	17.7689	0	6.29291	16.3616	23.4554	30.8924	35.5835		0	2.71647	7.30051	9.67742	11.545	14.7708	0.106838	7.63889	24.7863	36.8056
	0.863664	3.08452	5.79889	9.13017	14.0654	18.0136	14.2857	35.7143	35.7143	35.7143	35.7143	35.7143		0	1.19284	2.18688	2.98211	3.37972	3.77734	1.75781	6.36719	10.625	14.3359	17.3828	19.9219		0.660066	1.9802	2.47525	3.46535	3.79538	5.11551	6.83761	11.1111	13.6752	17.094	20.0855	22.2222		0	1.19284	2.18688	2.98211	3.37972	3.77734	1.75781	6.36719	10.625	14.3359
	0.455581	2.31587	4.36598	7.85877	11.8831	19.2863	0.181159	4.25725	12.7717	21.8901	30.4046	37.0169		0.711491	1.60085	3.13056	5.26503	9.17823	13.3404	0.19802	1.18812	3.06931	4.55446	5.74257	7.52475		0.394255	2.08392	4.81554	8.81442	12.5317	17.488	0.065445	1.89791	3.82853	6.60995	9.09686	11.4856		0.711491	1.60085	3.13056	5.26503	9.17823	13.3404	0.19802	1.18812	3.06931	4.55446
	1.38714	2.52207	4.28752	5.98991	9.01639	12.7364	0	7.79221	10.3896	12.1212	13.8528	16.0173		2.05647	4.82747	9.7595	14.465	21.924	29.6968	0.077912	1.63615	4.40203	7.44059	9.89482	12.4659		1.2288	3.66183	8.23298	13.1973	19.071	25.854	0	2.6958	7.66175	13.7911	19.1544	24.0636		2.05647	4.82747	9.7595	14.465	21.924	29.6968	0.077912	1.63615	4.40203	7.44059
	0	0	0	2.2409	7.0028	11.4846	0	1.21212	6.66667	12.7273	18.7879	21.8182		0	0.43573	2.17865	4.3573	9.58606	17.2113	0	4.58015	11.1959	16.7939	19.5929	21.6285		0	0.383142	1.91571	7.08812	12.6437	18.9655	0	5.6701	12.3711	14.433	17.5258	19.5876		0	0.43573	2.17865	4.3573	9.58606	17.2113	0	4.58015	11.1959	16.7939
	2.62664	16.1351	27.955	33.0206	37.5235	43.3396	0	0	0	0	0	0		2.99177	14.0613	23.5228	32.5729	38.2573	44.2408	0.590551	1.5748	2.3622	2.95276	3.14961	3.14961		2.88046	16.9467	26.6923	34.8056	40.6145	47.9117	0.422535	1.12676	1.90141	2.04225	3.16901	4.50704		2.99177	14.0613	23.5228	32.5729	38.2573	44.2408	0.590551	1.5748	2.3622	2.95276
	0.408998	2.86299	6.87117	9.77505	15.1329	21.5133	0	3.32986	8.74089	13.5276	17.794	21.1238		0.73025	3.14229	7.83359	13.5428	20.0266	26.5324	0.190931	3.29356	8.68735	13.4606	18.8067	23.0072		1.027	4.66549	10.0352	15.669	22.2711	28.3157	0.114548	2.4055	6.18557	11.2829	14.7766	18.6712		0.73025	3.14229	7.83359	13.5428	20.0266	26.5324	0.190931	3.29356	8.68735	13.4606
	1.05026	3.67592	9.00225	14.8537	21.0053	26.0315	1.89753	6.26186	10.0569	15.1803	17.8368	20.4934		0.823045	4.14462	8.23045	13.3745	18.9594	24.9559	2.62295	10.8197	16.0656	19.0164	19.6721	21.6393		0.752106	5.80626	15.2076	25.2106	34.4615	43.201	3.29025	9.75323	14.1011	18.4489	21.8566	23.0317		0.823045	4.14462	8.23045	13.3745	18.9594	24.9559	2.62295	10.8197	16.0656	19.0164
	0.135044	2.29575	4.99662	8.37272	11.4787	13.7745	2.15618	7.57576	19.9883	31.7016	40.8217	48.1935		0.711354	4.32285	9.9316	17.0178	22.9275	28.3447	3.76721	11.8523	24.1677	34.8561	43.7297	51.4643		0.111576	4.15621	10.2092	16.1506	23.152	28.5914	3.37538	10.899	23.4799	34.9585	45.2324	53.9834		0.711354	4.32285	9.9316	17.0178	22.9275	28.3447	3.76721	11.8523	24.1677	34.8561
	2.4	13.6	19.2	25.6	30.8	30.8	2.23881	16.4179	24.6269	28.7313	35.8209	38.0597		1.92308	14.7436	21.1538	25.9615	32.0513	35.5769	4.2522	23.607	32.1114	35.044	38.7097	41.4956		3.16456	19.3038	28.481	32.2785	34.1772	39.3987	4.7046	21.9912	33.2604	38.2932	42.3414	44.3107		1.92308	14.7436	21.1538	25.9615	32.0513	35.5769	4.2522	23.607	32.1114	35.044
	0	0	0	11.7647	11.7647	11.7647	0	4.55531	12.1475	21.9089	31.6703	35.141		0	0.858369	6.86695	9.44206	13.3047	13.3047	0.143062	5.75823	20.3147	32.0815	42.0959	49.392		0	0.941915	4.3956	8.47724	13.6578	16.7975	0	4.24009	17.0154	28.5242	36.3987	44.4934		0	0.858369	6.86695	9.44206	13.3047	13.3047	0.143062	5.75823	20.3147	32.0815
	0	2.5641	12.3397	19.8718	25.3205	30.2885	0	3.0888	5.21236	6.56371	8.88031	9.65251		0	2.43902	7.04607	10.9756	15.9892	19.2412	1.23203	5.95483	9.65092	11.499	14.3737	17.8645		0.732601	0.732601	4.3956	8.79121	10.2564	11.7216	0.688468	6.0241	10.4991	12.9088	13.5972	14.8021		0	2.43902	7.04607	10.9756	15.9892	19.2412	1.23203	5.95483	9.65092	11.499
	1.86916	1.86916	1.86916	1.86916	3.73832	5.60748	1.03627	6.21762	7.25389	8.29016	8.29016	9.32642		0.383509	1.53404	3.16395	6.23202	8.82071	10.2589	0.882569	2.67222	7.94312	15.9108	23.9519	30.939		1.56965	3.0085	7.19424	10.726	14.7809	19.7515	0.611621	5.50459	7.03364	9.48012	9.48012	10.7034		0.383509	1.53404	3.16395	6.23202	8.82071	10.2589	0.882569	2.67222	7.94312	15.9108
	0.570207	5.41696	9.97862	14.9679	18.8168	21.6679	0	0.526316	0.526316	2.10526	3.68421	4.21053		1.9084	6.77481	9.92366	11.9275	14.1221	16.126	0	1.15607	2.50482	5.58767	6.74374	8.47784		0.749415	4.91803	9.83607	13.3021	16.2529	20.3279	0	0	1.19225	2.3845	2.3845	2.83159		1.9084	6.77481	9.92366	11.9275	14.1221	16.126	0	1.15607	2.50482	5.58767
	0.431965	0.863931	1.2959	3.45572	4.31965	6.2635	1.98675	4.63576	9.27152	11.9205	13.245	15.2318		0	0.704225	2.11268	4.22535	4.92958	5.6338	1.97531	5.67901	9.38272	13.0864	14.5679	16.5432		0	1.80995	4.0724	5.88235	8.59729	8.59729	0.157978	4.18641	8.76777	11.9273	14.9289	17.1406		0	0.704225	2.11268	4.22535	4.92958	5.6338	1.97531	5.67901	9.38272	13.0864
	0.0862069	2.28448	8.40517	14.7414	21.7241	27.6293	0.770218	2.1181	4.74968	6.80359	10.077	12.7728		0.168883	2.11104	8.54972	17.4372	24.467	31.0534	1.06735	3.64372	7.54509	10.7471	14.17	17.5193		0.0941841	1.88368	10.2661	17.5653	25.7123	32.4935	0.774194	2.80645	3.87097	6.06452	9.29032	11.9355		0.168883	2.11104	8.54972	17.4372	24.467	31.0534	1.06735	3.64372	7.54509	10.7471
	2.12766	4.25532	7.44681	13.8298	15.9574	18.0851	0	8.12937	32.3864	50.2185	61.7133	69.1434		0	4.18605	6.97674	9.30233	12.3256	13.4884	0	9.15493	22.1831	32.7465	38.0282	40.1408		0.08726	2.1815	7.19895	12.4346	17.4956	20.5497	0	5.21542	21.3152	28.7982	37.6417	41.2698		0	4.18605	6.97674	9.30233	12.3256	13.4884	0	9.15493	22.1831	32.7465
	0.813008	4.74255	9.21409	13.2791	16.2602	19.4444	0	2.54372	9.69793	13.5135	16.3752	17.6471		1.34164	7.18735	14.231	19.5496	24.437	28.5098	0.641711	4.49198	8.02139	13.1551	16.4706	18.3957		0.44065	6.05894	14.1834	20.0496	26.2187	30.7629	0.251572	2.51572	8.80503	13.4591	14.8428	15.5975		1.34164	7.18735	14.231	19.5496	24.437	28.5098	0.641711	4.49198	8.02139	13.1551
	0	3.86847	7.73694	10.8317	13.3462	15.8607	3.38739	8.21622	13.6577	22.0541	29.6937	37.4054		0	3.24427	12.2137	19.1476	23.9186	28.944	3.74364	8.74873	15.9512	23.0112	30.1526	37.3754		0	1.18343	4.73373	9.86193	14.5957	18.146	4.0681	9.78495	16.81	24.8746	32.1326	37.7599		0	3.24427	12.2137	19.1476	23.9186	28.944	3.74364	8.74873	15.9512	23.0112
	0	4.31655	5.7554	5.7554	7.19424	8.63309	0	5.41205	16.1132	25.0923	29.7663	34.0713		0.504414	2.90038	5.67465	6.43127	9.33165	11.3493	0	8.27423	21.3948	31.5012	37.1158	41.3121		1.21212	4.84848	6.06061	7.27273	9.69697	10.9091	0	5.82386	16.2642	23.0114	29.7585	34.0199		0.504414	2.90038	5.67465	6.43127	9.33165	11.3493	0	8.27423	21.3948	31.5012
	0.326975	5.61308	11.3351	16.9482	23.4332	27.6839	0.359712	6.47482	13.1295	16.0072	19.964	21.9424		0.696423	7.88224	15.0681	23.3935	29.7246	34.7262	0.20555	5.65262	12.5899	19.1161	22.5591	26.5159		0.374532	6.49189	13.015	20.1623	26.6542	32.6467	0.135777	4.68432	9.97963	14.2566	18.7373	22.3354		0.696423	7.88224	15.0681	23.3935	29.7246	34.7262	0.20555	5.65262	12.5899	19.1161
	0.849257	3.18471	6.36943	9.34183	10.6157	12.9512	0.716846	3.04659	7.16846	9.13978	11.1111	13.2616		0.775434	13.1514	27.0627	38.4926	46.5416	53.629	0	3.4279	6.50118	10.0473	12.4113	14.0662		0.757576	7.12121	13.1818	18.9015	22.7273	25.947	0.442968	2.65781	5.42636	8.52713	10.9635	12.5138		0.775434	13.1514	27.0627	38.4926	46.5416	53.629	0	3.4279	6.50118	10.0473
	0	3.76176	8.98642	15.047	22.2571	28.1087	0.170358	3.83305	9.71039	15.2044	21.2095	25.724		0	1.94805	5.19481	7.14286	8.76623	14.2857	0	2.29192	5.87053	9.04704	11.4596	14.4351		0.304414	2.79046	8.47286	14.967	20.5987	25.1649	0.0558191	2.0374	5.58191	8.84733	12.8663	16.8295		0	1.94805	5.19481	7.14286	8.76623	14.2857	0	2.29192	5.87053	9.04704
	0	8.57143	14.2857	20	20	20	0	2.85714	3.80952	8.57143	10.9524	13.8095		3.61757	7.49354	10.0775	12.9199	14.9871	17.8295	0	3.21716	6.16622	8.0429	10.7239	14.2091		0.953895	5.08744	11.1288	13.8315	16.2162	17.6471	0	0.641026	3.20513	5.12821	7.05128	8.33333		3.61757	7.49354	10.0775	12.9199	14.9871	17.8295	0	3.21716	6.16622	8.0429
	0	3.36134	3.36134	5.04202	5.88235	7.56303	0	0.902935	4.96614	11.5688	18.5102	24.1535		0.332779	2.82862	5.74043	6.90516	9.56739	11.1481	0	1.72557	7.56757	16.5489	26.5073	34.0125		0.930233	2.0155	4.49612	6.66667	7.5969	7.5969	0	1.04439	4.78677	9.79112	14.6214	18.973		0.332779	2.82862	5.74043	6.90516	9.56739	11.1481	0	1.72557	7.56757	16.5489
	0	9.27152	15.2318	15.2318	15.2318	15.2318	0	5.32915	9.40439	11.5987	12.2257	13.1661		0.834725	6.92821	12.9382	18.9482	22.9549	24.207	0	1.05708	1.47992	2.32558	2.32558	3.59408		2.18579	6.01093	11.7486	15.3005	17.7596	18.8525	0	1.33869	2.1419	4.14993	4.95315	6.0241		0.834725	6.92821	12.9382	18.9482	22.9549	24.207	0	1.05708	1.47992	2.32558
	2.53165	5.06329	7.59494	7.59494	10.1266	10.1266	0	1.22768	3.79464	9.15179	14.0625	17.7455		0.71736	4.98565	9.21808	16.1047	20.66	24.3544	0	0.583942	3.16302	8.51582	12.7981	17.2749		0.922367	5.07302	9.99231	15.5265	17.6018	21.2145	0	0.641368	3.26029	6.78781	11.3308	14.9653		0.71736	4.98565	9.21808	16.1047	20.66	24.3544	0	0.583942	3.16302	8.51582
	0	4.32596	11.4688	18.8129	22.7364	27.0121	0	6.30631	15.7658	19.3694	20.2703	20.2703		3.95708	17.4954	33.9178	47.0154	57.2387	65.1624	0	4.38596	10.2339	15.4971	19.0058	20.1754		2.17391	11.4441	24.7981	36.0093	44.4099	51.2888	0	2.17391	10.1902	15.8967	20.1087	22.8261		3.95708	17.4954	33.9178	47.0154	57.2387	65.1624	0	4.38596	10.2339	15.4971
	0	4.84848	14.2424	18.4848	20.303	23.9394	0	0	3.33333	8.25397	11.9048	16.0317		0	7.8635	10.6825	16.0237	17.9525	21.6617	0	0.331126	1.49007	4.13907	7.28477	10.2649		0	3.55805	9.45693	13.2959	17.3221	20.9738	0	0	1.38504	4.84765	8.03324	10.6648		0	7.8635	10.6825	16.0237	17.9525	21.6617	0	0.331126	1.49007	4.13907
	7.63931	23.4448	39.1489	50.5775	59.2097	65.4914	0	0.823045	4.11523	6.99588	8.64198	11.1111		7.00095	18.8505	28.9735	36.1164	42.4314	46.5705	0	0.638978	2.55591	5.7508	8.30671	12.1406		6.48009	19.4778	29.6394	37.3216	44.2149	49.136	0	0.468384	3.51288	5.62061	7.96253	8.8993		7.00095	18.8505	28.9735	36.1164	42.4314	46.5705	0	0.638978	2.55591	5.7508
	0.347222	4.6875	11.6319	19.4444	23.9583	31.0764	0	0	1.57767	3.39806	5.58252	7.76699		0	2.82686	9.42285	14.841	21.7903	27.5618	0	0.111982	1.39978	4.08735	7.11086	10.6943		0	3.15893	10.0691	15.7947	23.0997	28.5291	0	0.124533	1.43213	3.92279	7.78331	10.8344		0	2.82686	9.42285	14.841	21.7903	27.5618	0	0.111982	1.39978	4.08735
	0	5.37084	8.95141	13.555	17.1355	17.1355	2.42215	5.32007	8.391	11.5052	16.5657	22.7076		0.606323	4.4175	10.0476	15.8943	20.0953	23.2568	1.18963	2.59339	4.49679	7.61361	11.4442	15.9648		0.785855	6.09037	8.44794	10.4126	12.1807	12.9666	0.896108	1.87623	3.3604	5.88071	8.70905	11.9574		0.606323	4.4175	10.0476	15.8943	20.0953	23.2568	1.18963	2.59339	4.49679	7.61361
	0	1.71429	6.28571	10.8571	14.8571	16	0	0.274348	2.19479	5.48697	8.77915	12.8944		0	2.14477	5.63003	9.11528	10.5898	10.8579	0.438116	0.657174	2.40964	4.81928	8.65279	12.2673		0	4.2517	7.9932	10.034	12.2449	14.966	0.323102	1.45396	3.63489	7.59289	12.2779	15.6704		0	2.14477	5.63003	9.11528	10.5898	10.8579	0.438116	0.657174	2.40964	4.81928
	1.05541	17.1504	23.7467	27.1768	28.2322	29.8153	0	0	4.62555	10.1322	13.2159	16.2996		2.15716	16.641	23.2666	24.9615	26.5023	27.2727	0	0.669216	4.58891	13.0975	17.782	20.8413		2.88809	20.3971	26.7148	29.9639	32.3105	32.6715	0	0.272109	3.80952	7.48299	10.4762	14.4218		2.15716	16.641	23.2666	24.9615	26.5023	27.2727	0	0.669216	4.58891	13.0975
	0.421053	4.73684	12.8421	17.3684	19.5789	22	0	0.386847	1.16054	3.48162	6.18956	8.51064		0.487409	9.66694	15.5158	19.9025	23.1519	26.3201	0	0	0.489596	2.44798	4.77356	6.48715		0.986842	6.41447	11.8421	13.8158	15.1316	16.1184	0	0.236967	1.65877	3.31754	5.45024	7.81991		0.487409	9.66694	15.5158	19.9025	23.1519	26.3201	0	0	0.489596	2.44798
	1.55556	3.77778	8.55556	14.8889	18.5556	23.3333	1.95228	5.09761	8.56833	12.256	16.7028	20.4989		1.30874	4.22368	8.74479	13.9203	19.1553	24.3308	2.64824	5.52677	9.55671	11.8595	17.6742	21.9919		1.08011	3.60036	9.31593	13.6814	18.3618	23.8524	3.20579	5.06722	8.42813	13.0817	17.3733	21.5098		1.30874	4.22368	8.74479	13.9203	19.1553	24.3308	2.64824	5.52677	9.55671	11.8595
	0.39019	10.1728	28.3724	43.1996	53.3166	60.2007	0.342466	2.56849	9.07534	15.7534	20.0342	26.1986		0.498615	6.51893	16.5836	26.759	35.3093	42.0499	0	4.72727	10.9091	15.6364	18.5455	21.0909		0.345821	6.91643	19.2651	30.9078	41.1671	49.6686	0	2.25806	8.3871	14.1935	17.7419	20.8065		0.498615	6.51893	16.5836	26.759	35.3093	42.0499	0	4.72727	10.9091	15.6364
	0.160729	9.80445	27.9132	42.4324	53.7637	60.4875	1.86722	3.73444	6.77732	11.3416	16.0443	22.2683		2.1575	16.8285	25.7821	31.7152	36.5696	39.2665	1.61858	4.64462	7.88177	11.9986	16.9951	21.6045		0.757576	11.8371	23.6742	33.6174	39.4413	43.5606	1.71644	3.77618	6.72846	10.6419	14.6584	20.5973		2.1575	16.8285	25.7821	31.7152	36.5696	39.2665	1.61858	4.64462	7.88177	11.9986
	40.107	57.8877	64.0374	68.4492	70.4545	72.3262	0	1.07527	2.15054	11.2903	17.7419	22.043		41.6781	61.1188	70.0138	73.7276	76.0202	77.7166	0	1.03627	5.18135	8.80829	10.3627	10.3627		39.7759	62.5	71.4986	75.9804	77.9762	79.3417	0.759013	3.70019	10.7211	17.0778	24.2884	28.8425		41.6781	61.1188	70.0138	73.7276	76.0202	77.7166	0	1.03627	5.18135	8.80829
	29.0148	61.9704	76.0099	81.6749	86.1576	87.5369	0	3.37909	11.5628	20.5385	27.6135	33.4741		34.3057	61.4215	72.6376	77.1569	79.0058	80.3615	0	2.42694	7.28083	13.4225	18.4745	22.3873		37.6904	64.9429	75.5393	79.981	82.1383	82.9632	0	1.17944	2.61163	4.80202	7.49789	10.3623		34.3057	61.4215	72.6376	77.1569	79.0058	80.3615	0	2.42694	7.28083	13.4225
	0	15.3846	28.2051	28.2051	33.3333	33.3333	0	0	4.6875	8.59375	15.2344	19.1406		2.5974	9.52381	11.2554	13.4199	14.2857	14.2857	0	0.95498	7.02592	13.5061	19.4407	24.0109		0.815217	11.413	18.2065	23.0978	24.8641	27.8533	0	2.09497	7.86778	15.5493	22.8585	28.8641		2.5974	9.52381	11.2554	13.4199	14.2857	14.2857	0	0.95498	7.02592	13.5061
	0	0	0	0	0	0	2.51479	5.25148	8.9497	13.3136	18.3432	22.855		0	0	0	0	0.447928	1.56775	2.68456	4.9217	9.44072	14.6309	18.434	23.8031		0	0	0	0	0	1.61943	1.88324	3.67232	7.06215	11.3465	16.1488	20.0565		0	0	0	0	0.447928	1.56775	2.68456	4.9217	9.44072	14.6309
	0	1.83486	1.83486	1.83486	3.66972	3.66972	1.74588	6.88652	19.0349	31.2076	42.3375	50.8972		0.505051	1.26263	3.28283	6.31313	7.32323	8.58586	2.19589	10.8057	22.9858	32.1485	40.9163	48.436		0	0.584795	2.92398	4.09357	5.26316	6.43275	1.78926	6.97813	15.0895	23.0417	31.8489	38.6879		0.505051	1.26263	3.28283	6.31313	7.32323	8.58586	2.19589	10.8057	22.9858	32.1485
	0	2.53165	4.21941	8.43882	10.1266	10.9705	0	0.632244	4.32034	12.118	18.4405	23.4984		0	1.90476	7.42857	10.8571	12.7619	14.6667	0	1.22449	6.42857	11.2245	16.4286	19.898		0	1.0101	5.05051	8.08081	9.09091	10.101	0	0.340136	4.08163	7.31293	11.7347	15.6463		0	1.90476	7.42857	10.8571	12.7619	14.6667	0	1.22449	6.42857	11.2245
	2.6087	6.95652	9.56522	10.4348	10.4348	10.4348	1.35364	3.6097	6.31698	10.1523	14.7208	19.5149		1.04932	5.14166	9.44386	10.9129	11.7524	12.277	1.15326	2.85281	5.18968	9.01366	14.264	20.2124		0.443951	5.10544	6.88124	7.65816	9.87791	10.9878	1.4293	3.6243	7.12098	11.7407	17.6621	23.4558		1.04932	5.14166	9.44386	10.9129	11.7524	12.277	1.15326	2.85281	5.18968	9.01366
	0	10	10	10	10	20	0	0	0	0	0	0		1.06667	5.86667	10.4	11.4667	13.0667	15.7333	0	1.09091	3.63636	4.72727	5.81818	7.63636		1.04167	4.16667	7.29167	7.29167	9.375	10.4167	0	1.36986	2.93542	4.50098	4.89237	5.08806		1.06667	5.86667	10.4	11.4667	13.0667	15.7333	0	1.09091	3.63636	4.72727
	0	7.40741	7.40741	7.40741	7.40741	7.40741	1.41343	2.82686	4.59364	7.59717	10.2473	13.4276		0	0	0	3.0303	3.0303	3.0303	1.3544	3.5553	6.03837	10.158	14.2212	17.833		0.361991	3.9819	8.0543	11.6742	13.8462	17.2851	1.08475	2.84746	5.42373	8.67797	10.8475	13.0847		0	0	0	3.0303	3.0303	3.0303	1.3544	3.5553	6.03837	10.158
	2.25564	10.5263	15.7895	18.797	20.3008	22.9323	0.796813	4.38247	11.1554	16.3347	21.9124	22.7092		0.657895	9.375	16.1184	21.0526	24.8355	26.6447	0.189873	2.05696	6.13924	11.3608	16.519	21.0443		1.27932	8.10235	11.7271	14.2857	18.5501	19.1898	0.140944	1.12755	4.01691	7.25863	10.148	12.9669		0.657895	9.375	16.1184	21.0526	24.8355	26.6447	0.189873	2.05696	6.13924	11.3608
	0	10.2941	13.2353	22.7941	24.2647	24.2647	2.68199	7.08812	12.2605	19.1571	23.3716	26.6284		0.297	10.4841	23.3145	33.7689	40.0059	45.0846	0.353982	2.83186	5.30973	8.49558	10.6195	13.8053		0.255288	13.0562	31.601	43.9278	53.5011	59.2815	1.56919	3.99429	5.56348	9.41512	11.8402	15.5492		0.297	10.4841	23.3145	33.7689	40.0059	45.0846	0.353982	2.83186	5.30973	8.49558
	1.6	9.6	13.6	16.8	20	20	0.993377	3.31126	9.76821	16.3907	22.351	26.9868		3.00429	17.382	22.9614	26.3948	30.2575	31.1159	0.63762	1.70032	2.76302	4.88842	7.7577	10.0956		0.917431	8.25688	10.5505	15.1376	16.055	16.9725	0.508044	0.84674	1.60881	4.14903	7.28196	11.7697		3.00429	17.382	22.9614	26.3948	30.2575	31.1159	0.63762	1.70032	2.76302	4.88842
	0.233645	3.15421	7.47664	11.9159	16.5888	20.035	0	5.02283	16.895	25.7991	32.8767	37.2146		0.632547	4.45658	10.2933	15.6699	19.379	24.5256	0.158353	1.346	5.54236	14.331	20.9818	27.6326		0.40864	3.79451	7.58903	12.4051	16.8126	20.7531	0.216216	3.51351	12.3243	22.2162	30.3243	37.6216		0.632547	4.45658	10.2933	15.6699	19.379	24.5256	0.158353	1.346	5.54236	14.331
	0.572246	13.3763	23.3906	31.402	38.5551	45.9227	0.950119	4.69121	10.6888	17.8741	27.4347	34.2043		0.680272	9.96113	18.7075	25.2672	31.9242	36.8319	0.497658	3.48361	11.1241	20.9016	30.9133	39.5345		0.584307	11.0601	20.6594	27.5459	32.8047	37.4374	0.530191	4.81591	14.2121	25.3019	35.5376	44.8748		0.680272	9.96113	18.7075	25.2672	31.9242	36.8319	0.497658	3.48361	11.1241	20.9016
	0.97561	1.95122	4.39024	6.82927	6.82927	7.80488	0	0	1.19048	1.19048	2.38095	2.97619		2.80899	6.17978	10.1124	12.3596	13.4831	14.0449	0	0	0	0	0	0		0	4.69208	8.21114	9.67742	10.2639	10.8504	0	0	0	0	0	0		2.80899	6.17978	10.1124	12.3596	13.4831	14.0449	0	0	0	0
	0	4.63576	9.93377	13.7748	15.0993	18.6755	0	0	0.840336	3.36134	5.46218	5.46218		0	5.48961	11.276	15.2819	18.3976	21.365	0	0.530504	1.32626	2.38727	3.44828	4.77454		0.383632	4.66752	8.88747	11.6368	14.9616	18.2864	0	0	2.57353	3.86029	6.80147	8.63971		0	5.48961	11.276	15.2819	18.3976	21.365	0	0.530504	1.32626	2.38727
	0	5.91716	7.69231	8.87574	8.87574	10.6509	2.11899	6.51997	10.9209	14.7514	18.2559	21.5159		2.60116	10.6936	17.341	20.8092	22.2543	23.6994	5.26642	11.8804	21.9796	31.9548	39.7924	46.8092		0.506329	5.06329	7.34177	9.36709	11.3924	11.8987	2.57063	5.65076	13.988	22.3483	29.9907	36.3594		2.60116	10.6936	17.341	20.8092	22.2543	23.6994	5.26642	11.8804	21.9796	31.9548
	0.470588	4.47059	5.41176	6.11765	7.52941	8.23529	0	1.02041	9.31122	16.4541	27.0408	33.801		0.350877	1.22807	2.89474	3.85965	5.4386	6.31579	0.0877193	0.877193	6.53509	14.6491	23.1579	31.2719		0	2.08333	5.20833	7.5	9.16667	9.58333	0.246914	2.59259	11.2346	21.1111	28.3951	33.9506		0.350877	1.22807	2.89474	3.85965	5.4386	6.31579	0.0877193	0.877193	6.53509	14.6491
	0.347222	3.125	5.55556	9.20139	11.2847	13.3681	0.651466	3.63735	8.2519	13.5179	21.2812	27.633		0.429761	3.16949	8.08488	12.2213	16.4384	21.1657	0.211472	3.30426	7.82448	14.3537	20.8565	28.1523		0.261438	3.72549	8.67102	15.2288	21.7211	27.4074	0.168883	4.01098	13.2784	23.0315	31.3278	39.4131		0.429761	3.16949	8.08488	12.2213	16.4384	21.1657	0.211472	3.30426	7.82448	14.3537
	2.54545	6.61818	10.6182	14.6182	17.5273	19.2727	0	0	5	5	5	5		2.84546	6.13551	10.5282	16.1302	22.1056	27.6898	0	0	0	1.49813	2.24719	2.99625		3.36134	8.51393	13.2906	18.7085	23.9717	28.9031	0	2.07039	2.27743	3.72671	6.8323	8.28157		2.84546	6.13551	10.5282	16.1302	22.1056	27.6898	0	0	0	1.49813
	0	0	4.12371	5.15464	7.21649	7.21649	0	0.848656	2.82885	3.67751	5.51627	7.49646		0	2.18978	7.42092	10.8273	13.2603	15.3285	0	3.56083	4.74777	6.23145	7.4184	9.49555		0	1.45673	6.76949	11.5681	14.91	18.8518	0	2.07254	5.18135	8.29016	10.3627	11.399		0	2.18978	7.42092	10.8273	13.2603	15.3285	0	3.56083	4.74777	6.23145
	0	0	0	0	0	0	3.75276	9.93377	15.4525	20.3091	23.8411	27.8146		0	1.34645	6.88762	13.4645	18.4878	21.6986	1.44092	5.18732	8.50144	11.3833	14.9856	18.2997		0	3.2538	5.85683	9.32755	13.0152	15.4013	1.28558	6.06061	10.5601	14.6006	18.641	21.4876		0	1.34645	6.88762	13.4645	18.4878	21.6986	1.44092	5.18732	8.50144	11.3833
	1.5748	6.92913	14.3307	19.5276	27.4016	34.0157	2.18808	11.1732	21.2756	31.1453	39.5251	49.3482		0.937207	5.9044	15.4639	25.0234	33.7395	39.6439	0.756348	4.24095	12.9119	22.2853	30.6051	37.3312		1.95904	7.39092	16.3847	23.5085	31.2556	35.9751	0.409743	4.43888	13.7264	23.4464	33.1664	41.5434		0.937207	5.9044	15.4639	25.0234	33.7395	39.6439	0.756348	4.24095	12.9119	22.2853
	0.8726	2.44328	5.32286	9.1623	12.6527	14.6597	0	8.38323	14.9701	19.7605	23.9521	26.3473		0.467153	1.9562	4.43796	7.56204	12.3212	16.4672	0	4.92228	13.4715	16.8394	22.7979	25.6477		0.593472	1.78042	3.90702	6.87438	10.6825	14.5401	0.368324	4.78821	10.1289	14.733	18.6004	21.1786		0.467153	1.9562	4.43796	7.56204	12.3212	16.4672	0	4.92228	13.4715	16.8394
	0	1.9802	6.43564	7.92079	7.92079	10.8911	1.13636	4.6875	7.8125	12.2159	14.7727	16.7614		0.634719	2.25325	5.42685	9.83815	13.7734	18.026	1.16077	4.35287	10.2147	15.4962	17.9338	20.8358		0.375235	1.68856	5.17824	8.78049	12.7955	17.0356	1.1041	3.5489	7.13722	11.1987	14.4322	19.0063		0.634719	2.25325	5.42685	9.83815	13.7734	18.026	1.16077	4.35287	10.2147	15.4962
	0	0.266312	2.3968	3.99467	4.92676	7.85619	0.705394	5.80913	13.9834	24.9378	35.1452	44.6473		0	0.658617	1.31723	2.08562	2.96378	4.50055	0.0717103	2.76085	9.91395	19.5769	28.8275	38.3112		0.165837	0.746269	2.15589	2.98507	5.3068	6.55058	0.247919	3.59483	11.723	23.4992	33.4868	43.2265		0	0.658617	1.31723	2.08562	2.96378	4.50055	0.0717103	2.76085	9.91395	19.5769
	0	0	0	0	0	0	0	1.42737	10.4954	19.2275	25.6927	34.3409		1.47059	3.67647	3.67647	3.67647	3.67647	3.67647	0.21575	1.83387	9.81661	17.5836	24.3797	31.3916		3.89105	7.393	10.1167	13.6187	15.1751	15.9533	0	1.10294	8.27206	15.4412	21.875	28.3088		1.47059	3.67647	3.67647	3.67647	3.67647	3.67647	0.21575	1.83387	9.81661	17.5836
	0.915332	2.97483	4.11899	6.86499	9.15332	10.5263	0	5.04202	6.72269	6.72269	6.72269	6.72269		3.11005	9.80861	12.6794	14.8325	17.4641	20.0957	1.0582	5.11464	8.99471	9.34744	10.7584	11.8166		0.913242	5.93607	7.76256	12.7854	12.7854	12.7854	0.865801	3.4632	6.27706	8.22511	9.09091	10.3896		3.11005	9.80861	12.6794	14.8325	17.4641	20.0957	1.0582	5.11464	8.99471	9.34744
	0.209644	3.77358	9.22432	13.522	15.8281	19.392	0	1.0989	2.8083	6.22711	8.42491	11.1111		1.19581	6.57698	9.11809	12.1076	13.0045	15.2466	0	1.68067	5.37815	9.57983	11.2605	12.9412		0.273598	3.83037	8.75513	11.9699	14.4323	15.9371	0	0.826446	4.86685	9.18274	12.5803	16.1616		1.19581	6.57698	9.11809	12.1076	13.0045	15.2466	0	1.68067	5.37815	9.57983
	0	5.76923	9.61538	9.61538	11.5385	11.5385	0.21751	2.99076	11.4736	20.1196	27.8412	33.1158		0.503778	5.28967	9.82368	11.8388	12.8463	13.3501	0.0470367	3.03387	11.2653	20.6961	28.175	35.207		0.242424	4.24242	8.60606	12.1212	13.4545	14.9091	0	1.81077	6.38298	12.1322	16.976	21.3671		0.503778	5.28967	9.82368	11.8388	12.8463	13.3501	0.0470367	3.03387	11.2653	20.6961
	6	17	21	28	29	29	2.547	6.88296	14.1904	23.3172	31.5949	38.9933		4.49679	17.1306	25.4818	27.6231	29.9786	31.6916	0.692042	2.502	5.85574	10.3274	15.6774	20.5749		4.80591	17.7449	23.8447	29.39	31.4233	32.902	0.36305	1.89593	6.27269	12.2428	18.6365	23.9814		4.49679	17.1306	25.4818	27.6231	29.9786	31.6916	0.692042	2.502	5.85574	10.3274
	1	3.81818	10.1364	16.5	23.1818	29.3636	5.12821	23.0769	23.0769	25.641	28.2051	28.2051		1.32073	6.07834	14.618	23.8331	31.4723	38.5262	0.207792	4.77922	10.8052	15.4805	19.1688	22.026		1.52672	4.58015	11.9466	19.5802	26.813	33.3397	0.398142	5.30856	10.5508	14.0677	17.85	20.8361		1.32073	6.07834	14.618	23.8331	31.4723	38.5262	0.207792	4.77922	10.8052	15.4805
	0	26.087	34.7826	39.1304	39.1304	39.1304	0	0	0	1.07527	1.07527	1.07527		0	9.86547	16.5919	21.9731	27.3543	28.2511	0	0	0	0	0	0		0.434783	6.08696	12.3913	15.8696	18.2609	19.3478	0	0	0	0	0.531915	0.531915		0	9.86547	16.5919	21.9731	27.3543	28.2511	0	0	0	0
	2.9484	5.40541	7.86241	11.3841	13.8411	16.9533	0	0	2.90698	2.90698	4.06977	6.39535		2.57467	5.4068	9.01133	13.8002	17.1988	20.3399	0	0	2.09895	3.89805	7.1964	8.69565		2.62192	6.39748	9.85842	13.3193	17.3047	19.7693	0	0	2.91411	6.13497	7.05521	7.97546		2.57467	5.4068	9.01133	13.8002	17.1988	20.3399	0	0	2.09895	3.89805
	0	1.0661	3.83795	6.18337	7.88913	9.38166	0.699029	6.71845	17.0097	28.699	38.835	48.0777		0.330033	2.9703	4.29043	5.44554	6.27063	6.93069	0.148075	4.71372	13.3021	23.1984	33.3416	42.0039		0.283688	2.41135	5.24823	6.66667	7.23404	7.51773	0.383747	6.11738	16.6366	26.93	36.1174	44.5147		0.330033	2.9703	4.29043	5.44554	6.27063	6.93069	0.148075	4.71372	13.3021	23.1984
	0.45977	1.83908	2.29885	4.13793	4.13793	4.5977	0	0	0	0	0	3.9604		0.334728	1.17155	2.92887	4.51883	5.85774	7.02929	0	1.88457	5.30035	6.83157	9.42285	11.0718		0.2589	1.22977	3.04207	5.24272	6.86084	9.32039	0	0	1.50376	1.50376	1.50376	1.50376		0.334728	1.17155	2.92887	4.51883	5.85774	7.02929	0	1.88457	5.30035	6.83157
	0	0	0	0	0	0	0	0	0	0.477327	0.954654	1.43198		0	1.2945	2.91262	5.17799	9.2233	10.5178	0	0.172861	0.691443	0.950735	2.16076	3.19793		0	0	0	0	1.61943	1.61943	0	0	0	0.865801	0.865801	1.7316		0	1.2945	2.91262	5.17799	9.2233	10.5178	0	0.172861	0.691443	0.950735
	0	3.97351	5.29801	7.94702	11.9205	12.5828	0	0	2.46914	6.17284	6.17284	8.64198		1.92944	7.22161	14.2778	20.6725	26.4609	29.8236	0	0.239808	1.43885	3.35731	5.51559	6.23501		1.49378	6.39004	13.029	20.1245	25.1452	30.7884	0	0.911854	2.27964	3.95137	5.16717	5.92705		1.92944	7.22161	14.2778	20.6725	26.4609	29.8236	0	0.239808	1.43885	3.35731
	0	2.39234	6.45933	9.09091	10.5263	11.4833	0	0	3.50877	3.50877	3.50877	3.50877		0	5.54529	9.0573	12.0148	13.1238	13.8632	0	0.725514	2.78114	4.23216	4.71584	5.68319		0	6.79612	11.6505	13.5922	13.5922	13.5922	0	1.10497	1.10497	2.20994	3.31492	3.8674		0	5.54529	9.0573	12.0148	13.1238	13.8632	0	0.725514	2.78114	4.23216
	0	4.14938	7.05394	9.54357	10.3734	11.2033	0.344828	2.75862	8.01724	15.0862	21.3793	25.6034		0	3.96825	7.14286	8.73016	9.12698	10.3175	0.0854944	3.1063	8.54944	15.389	22.599	29.6381		0.550964	3.85675	5.50964	7.43802	9.64187	11.8457	0.133467	3.06974	9.24258	16.4164	24.6914	33.033		0	3.96825	7.14286	8.73016	9.12698	10.3175	0.0854944	3.1063	8.54944	15.389
	0	0	0	0	0	0	0.130976	2.48854	5.56647	9.49574	12.8356	16.11		0	1.08932	1.08932	1.96078	2.39651	4.57516	5.67416	16.236	22.809	26.8539	30.3371	33.1461		0	0.749064	2.49688	3.24594	4.24469	4.99376	2.34869	13.0081	18.6089	22.6739	25.0226	27.3713		0	1.08932	1.08932	1.96078	2.39651	4.57516	5.67416	16.236	22.809	26.8539
	0	2.43531	6.69711	10.0457	12.7854	13.5464	0	2.43902	6.62021	8.7108	10.1045	12.5436		0.350263	2.97723	8.58144	12.7846	16.1121	18.3888	0.753296	3.76648	7.34463	8.85122	10.9228	11.6761		0	1.74419	4.65116	6.97674	8.72093	9.88372	1.75439	5.55556	9.06433	12.8655	13.4503	14.0351		0.350263	2.97723	8.58144	12.7846	16.1121	18.3888	0.753296	3.76648	7.34463	8.85122
	0.71736	5.95409	13.4146	17.8623	21.6643	24.1033	0.407688	3.37798	9.43506	16.5987	25.2766	33.6634		0.267074	6.96299	18.1038	26.2686	32.2778	37.4475	0.234742	4.56442	11.9979	20.6051	29.8905	36.8023		0.554273	7.3903	16.7898	24.0416	29.1686	33.1178	0.391344	5.87017	13.9273	23.0203	33.2873	42.6105		0.267074	6.96299	18.1038	26.2686	32.2778	37.4475	0.234742	4.56442	11.9979	20.6051
	2.9473	9.94714	21.9446	34.4226	48.2941	59.7469	0	0.675676	0.675676	0.675676	3.37838	5.06757		1.50635	7.62036	19.1986	30.8359	41.8923	52.2792	0	1.75659	2.50941	3.76412	4.76788	5.5207		1.21963	6.25762	17.4125	30.5282	43.0997	53.4666	0	1.07335	1.78891	3.57782	4.65116	5.36673		1.50635	7.62036	19.1986	30.8359	41.8923	52.2792	0	1.75659	2.50941	3.76412
	0.184502	2.21402	6.64207	10.7011	13.1919	16.0517	2.7248	10.0817	16.6213	19.891	22.3433	25.8856		0.440044	2.42024	6.74734	11.1845	15.9149	19.2886	1.82055	7.28218	11.1834	14.4343	16.2549	18.4655		0.172936	2.50757	6.35538	10.1167	12.4946	14.9589	2.09205	7.74059	12.2385	16.1088	19.4561	22.6987		0.440044	2.42024	6.74734	11.1845	15.9149	19.2886	1.82055	7.28218	11.1834	14.4343
	0.186047	2.69767	4.55814	7.16279	8.93023	10.6977	0	2.92683	5.85366	7.31707	8.29268	11.7073		0.118133	2.71707	5.84761	9.74601	11.7543	15.1211	0.588235	2.35294	5.88235	7.94118	8.52941	9.11765		0.812458	4.33311	8.73392	12.39	14.9628	16.9939	0	2.20264	5.28634	8.59031	9.03084	10.3524		0.118133	2.71707	5.84761	9.74601	11.7543	15.1211	0.588235	2.35294	5.88235	7.94118
	0	3.27869	11.8033	21.3115	26.8852	33.4426	0	0.689655	4.87685	9.95074	14.5813	19.5567		0	2.41935	6.04839	12.7016	16.7339	20.9677	0	0.89779	4.21271	8.25276	11.8785	15.4696		0	2.49377	4.98753	9.97506	15.7107	23.6908	0	0.875386	4.32544	10.0669	15.036	19.4387		0	2.41935	6.04839	12.7016	16.7339	20.9677	0	0.89779	4.21271	8.25276
	0.169779	2.4618	4.66893	6.5365	8.40407	10.1019	0	0.71048	1.7762	3.5524	6.03908	8.70337		0.157729	3.70662	8.83281	14.327	18.7171	23.8696	0	1.69903	3.64078	4.36893	5.82524	9.46602		0.380952	2.74286	5.25714	8.19048	10.8571	14.0952	0.605144	1.66415	3.02572	5.59758	6.80787	9.22844		0.157729	3.70662	8.83281	14.327	18.7171	23.8696	0	1.69903	3.64078	4.36893
	0.573066	3.4384	9.16905	11.7479	12.894	14.0401	3.92749	13.5952	15.4079	16.6163	19.3353	20.8459		0.506971	2.78834	8.11153	11.1534	13.6882	15.4626	8.28313	17.1185	22.1888	26.2048	30.5221	34.0863		0.367647	2.20588	6.06618	8.27206	11.5809	12.6838	6.1665	12.2302	14.9024	18.3967	21.7883	24.9743		0.506971	2.78834	8.11153	11.1534	13.6882	15.4626	8.28313	17.1185	22.1888	26.2048
	0	0	0	0	0.352113	1.05634	0	4.72973	8.44595	11.8243	18.5811	23.3108		0	1.56114	4.50997	6.93842	8.15265	9.62706	0	0.74813	4.73815	9.55943	14.1313	18.537		0	0.632911	1.26582	2.53165	2.53165	2.53165	0.503778	3.84131	10.7053	20.403	29.1562	36.335		0	1.56114	4.50997	6.93842	8.15265	9.62706	0	0.74813	4.73815	9.55943
	0.207541	1.24524	4.32376	10.2733	19.6818	29.9896	0	0	0	0	0	0		0.251031	1.6317	5.11027	11.6012	19.7418	31.1637	0	0.977326	3.49883	8.22909	12.9789	18.5496		0.245442	1.64797	4.64586	11.3429	22.1599	32.4334	0	0.488998	1.46699	2.44499	4.03423	6.54034		0.251031	1.6317	5.11027	11.6012	19.7418	31.1637	0	0.977326	3.49883	8.22909
	0.261097	0.261097	2.61097	6.91906	8.74674	10.5744	1.08696	14.6739	21.1957	28.8043	31.5217	35.8696		0.343938	3.09544	7.13672	11.35	14.1874	16.595	0.613497	8.89571	14.4172	19.6319	23.0061	27.9141		0	1.50943	4.43396	7.83019	11.1321	13.5849	0	6.11765	13.8824	19.7647	22.3529	25.4118		0.343938	3.09544	7.13672	11.35	14.1874	16.595	0.613497	8.89571	14.4172	19.6319
	0	2.90909	5.09091	6.18182	7.63636	9.81818	0	0	1.50376	1.50376	3.00752	3.00752		0	1.21507	3.40219	7.2904	8.86999	11.9077	0.465116	1.9186	3.95349	6.80233	9.01163	11.9767		0	2.89855	6.28019	7.97101	8.45411	9.42029	0.402414	1.60966	3.92354	5.33199	7.04225	8.85312		0	1.21507	3.40219	7.2904	8.86999	11.9077	0.465116	1.9186	3.95349	6.80233
	0.617284	1.85185	4.62963	7.87037	10.6481	12.1914	0	0.34965	1.57343	2.0979	3.4965	4.8951		1.40412	5.6165	10.3115	15.4015	19.3067	23.0803	0.101163	0.708144	1.87152	4.24886	6.22155	10.1163		0	3.73444	5.39419	7.05394	9.54357	11.2033	0	0.527473	1.45055	4.13187	8.13187	10.9011		1.40412	5.6165	10.3115	15.4015	19.3067	23.0803	0.101163	0.708144	1.87152	4.24886
	0	1.71592	8.48427	15.6339	23.1649	30.3146	0	0	0	1.72414	1.72414	1.72414		0.186393	3.57254	11.0283	19.7266	28.7978	36.7816	0	0.909091	3.0303	4.54545	7.57576	9.69697		0.123039	3.29129	10.366	20.3014	29.8985	36.2965	0	0.501253	1.00251	3.00752	3.00752	8.77193		0.186393	3.57254	11.0283	19.7266	28.7978	36.7816	0	0.909091	3.0303	4.54545
	0.111607	11.1049	23.8839	30.7478	36.1049	40.1786	0	0	8.16327	8.16327	8.16327	8.16327		2.33554	22.8883	34.7606	41.5726	45.8155	48.2678	0	5.67823	13.5647	17.8233	20.347	23.3438		0.273973	14.726	26.5411	33.1849	37.7055	40.8219	1.75439	3.50877	12.2807	19.2982	21.9298	21.9298		2.33554	22.8883	34.7606	41.5726	45.8155	48.2678	0	5.67823	13.5647	17.8233
	0	0	0	0	0	0	0	5.92593	7.40741	8.88889	10.3704	11.8519		6.04396	18.4982	24.1758	25.641	28.022	29.304	0.838574	10.1677	18.6583	24.4235	28.4067	31.5514		9.90991	10.8108	10.8108	12.6126	12.6126	12.6126	0.473934	8.29384	13.7441	18.7204	21.564	22.2749		6.04396	18.4982	24.1758	25.641	28.022	29.304	0.838574	10.1677	18.6583	24.4235
	1.5748	13.3858	17.7165	20.0787	21.6535	25.9843	0	0	0	2.39521	2.39521	3.59281		3.59281	15.5689	22.1557	24.5509	26.3473	27.5449	0	1.00756	2.51889	4.53401	6.04534	9.06801		2.36686	12.7219	21.0059	22.7811	23.9645	26.3314	0	0.410678	2.46407	4.31211	6.77618	10.4723		3.59281	15.5689	22.1557	24.5509	26.3473	27.5449	0	1.00756	2.51889	4.53401
	1.44231	7.45192	16.5865	19.9519	22.8365	23.7981								1.30081	6.17886	12.8455	18.8618	23.9024	26.1789	0.172612	2.12888	4.83314	6.55926	7.71001	8.05524		2.76817	12.4567	19.3772	22.8374	25.6055	28.0277	0.253165	1.01266	2.53165	3.79747	4.05063	4.55696		1.30081	6.17886	12.8455	18.8618	23.9024	26.1789	0.172612	2.12888	4.83314	6.55926
	0	0	0	0	0	0.921659	0.863309	4.31655	7.76978	11.223	15.9712	20.7194		0.209644	3.14465	9.43396	13.1027	15.304	18.0294	0.493827	5.30864	11.1111	16.2346	21.6667	26.358		0	0	0.419287	1.46751	1.88679	2.30608	0.618238	3.32303	7.80526	10.7419	16.5379	20.4791		0.209644	3.14465	9.43396	13.1027	15.304	18.0294	0.493827	5.30864	11.1111	16.2346
	5.84615	25.8462	34.4615	38.1538	43.6923	45.5385	0.217077	5.24602	11.1795	18.0535	25.3618	30.4269		3.82514	18.306	28.6885	34.6995	36.3388	38.2514	0.0834725	0.626043	1.79466	3.00501	4.42404	5.96828		3.9604	23.0198	33.9109	38.7376	42.5743	45.1733	0.601866	1.86578	3.43063	5.59735	8.15528	11.1044		3.82514	18.306	28.6885	34.6995	36.3388	38.2514	0.0834725	0.626043	1.79466	3.00501
	0	13.2791	20.5962	28.1843	33.6043	35.7724	0	2.35294	4.70588	4.70588	5.88235	5.88235		0.607492	13.9723	29.0246	38.407	45.9332	51.6369	0.356443	3.15452	9.41009	15.8973	23.347	31.4382		0.392157	11.6667	19.5098	23.9216	26.7647	28.3333	0.444115	2.81273	6.40266	10.1406	13.3975	17.6166		0.607492	13.9723	29.0246	38.407	45.9332	51.6369	0.356443	3.15452	9.41009	15.8973
	0.604961	2.35935	4.90018	6.95705	9.55838	12.7042	0	2.34742	6.10329	6.10329	7.51174	7.51174		1.06952	3.88282	7.55638	12.811	18.2283	23.8317	0.492308	1.47692	3.2	4.73846	5.78462	7.38462		0.363738	3.83324	9.0235	15.7666	24.1746	31.953	0.27027	1.35135	2.97297	3.24324	3.51351	5.13514		1.06952	3.88282	7.55638	12.811	18.2283	23.8317	0.492308	1.47692	3.2	4.73846
	3.9312	26.7813	38.5749	46.683	49.3857	53.0713	0	2.04082	10.2041	19.0476	21.0884	22.449		2.44275	13.1298	24.1221	27.1756	31.4504	32.5191	0.506971	6.97085	20.4056	31.6857	39.6705	44.4867		2.58193	20.6554	30.3873	34.5581	38.431	42.2046	0	10.567	16.7526	23.4536	28.3505	32.4742		2.44275	13.1298	24.1221	27.1756	31.4504	32.5191	0.506971	6.97085	20.4056	31.6857
	0	0	0	2.24719	2.24719	2.24719	21.4286	37.5	41.0714	41.0714	41.0714	41.0714		0	1.50115	4.04157	7.27483	12.4711	15.127	5.21739	13.913	18.882	20.7453	20.9938	22.7329		0	0	3.53982	3.53982	4.42478	4.42478	5.23207	14.7679	19.0717	20.9283	22.1097	23.038		0	1.50115	4.04157	7.27483	12.4711	15.127	5.21739	13.913	18.882	20.7453
	2.36686	9.07298	13.9053	19.8225	24.7535	28.4024	2.08333	11.8056	12.5	13.8889	18.0556	18.0556		1.9943	5.55556	7.54986	9.68661	11.8234	12.8205	3.58423	16.129	23.2975	26.5233	28.6738	29.9283		3.41656	9.72405	13.7319	18.0026	21.9448	25.5585	1.55763	6.54206	11.838	14.2264	15.6802	17.2378		1.9943	5.55556	7.54986	9.68661	11.8234	12.8205	3.58423	16.129	23.2975	26.5233
	1.51707	3.4134	4.29836	6.57396	8.47029	10.1138	0.856164	15.3253	29.5377	38.4418	44.2637	49.0582		0.821596	3.11033	6.51408	8.74413	10.6221	13.2629	1.04781	7.33464	17.2233	24.6889	30.6483	33.4643		1.72101	3.71377	6.38587	8.33333	10.1449	13.0435	1.57952	16.2309	26.6885	35.0218	42.1569	45.915		0.821596	3.11033	6.51408	8.74413	10.6221	13.2629	1.04781	7.33464	17.2233	24.6889
	53.388	79.2404	85.3259	87.8722	89.1239	89.6849	0	1.66667	4.58333	11.25	15.4167	19.5833		36.7061	58.1691	65.8344	69.47	71.4411	72.7113	0	4.99325	11.0661	18.3536	21.8623	26.5857		44.5094	65.9489	71.701	75.3307	77.207	78.745	0	2.13904	12.8342	19.7861	24.0642	25.1337		36.7061	58.1691	65.8344	69.47	71.4411	72.7113	0	4.99325	11.0661	18.3536
	0	2.21402	3.69004	6.08856	7.01107	8.48708	0	8	16.8571	22	28.2857	29.4286		0.34904	3.83944	7.62071	10.7039	13.7871	16.9866	0	4.70588	10.5882	16.0428	20.5348	24.2781		0.771605	4.01235	9.25926	12.6543	17.3611	21.8364	0	0.956938	6.45933	10.8852	15.0718	19.7368		0.34904	3.83944	7.62071	10.7039	13.7871	16.9866	0	4.70588	10.5882	16.0428
	0	0.465658	3.84168	7.33411	9.31315	11.6414	0	0	0	0	0	0		0.0251193	5.40065	15.6242	26.4758	36.2974	45.1897	0	0.344037	2.92431	6.59404	11.5252	14.7362		0	1.21602	4.57797	6.86695	9.15594	10.7296	0.172414	0.862069	5.34483	10.2586	17.3276	22.7586		0.0251193	5.40065	15.6242	26.4758	36.2974	45.1897	0	0.344037	2.92431	6.59404
	1.86143	7.03206	10.8583	13.7539	16.3392	19.2347	0.849618	3.48343	5.94732	8.6661	10.9601	14.0187		2.20901	8.8785	13.424	17.1623	20.9431	23.237	0.517241	2.32759	3.7069	8.27586	10.5172	12.5		1.75439	7.58653	11.4272	15.2679	17.3068	19.4405	0.306748	1.22699	2.76074	4.60123	5.3681	7.20859		2.20901	8.8785	13.424	17.1623	20.9431	23.237	0.517241	2.32759	3.7069	8.27586
	0.344234	4.13081	5.67986	6.19621	9.29432	10.6713	0.424178	2.8632	7.8473	12.8314	15.9067	19.8303		0.723327	2.16998	4.15913	6.32911	7.4141	9.22242	0.380952	1.07937	3.87302	5.84127	8.38095	10.2222		0.630915	1.26183	3.78549	5.04732	5.04732	7.57098	0.344234	1.0327	3.27022	6.36833	9.46644	11.1876		0.723327	2.16998	4.15913	6.32911	7.4141	9.22242	0.380952	1.07937	3.87302	5.84127
	1.7192	14.0401	23.2092	27.7937	32.3782	35.8166	0.899101	3.6963	6.29371	9.59041	12.8871	15.5844		0.3367	7.74411	18.0135	26.0943	30.4714	33.67	1.07087	2.58268	4.22047	6.74016	9.29134	11.4646		1.52188	9.76538	16.9309	24.1598	31.896	38.0469	1.21692	2.98144	6.41923	11.6824	15.6678	20.1399		0.3367	7.74411	18.0135	26.0943	30.4714	33.67	1.07087	2.58268	4.22047	6.74016
	0.704777	2.81911	4.6202	7.04777	9.24041	11.5897	1.40895	3.8746	9.93308	17.1187	23.8464	29.3765		1.03799	8.01329	18.2583	28.5966	38.6651	47.7891	0.520494	1.69161	3.38321	5.27001	7.09174	8.78334		0.84097	7.8814	18.3935	28.6685	38.6415	47.0296	0.505902	1.51771	3.457	5.39629	6.57673	8.68465		1.03799	8.01329	18.2583	28.5966	38.6651	47.7891	0.520494	1.69161	3.38321	5.27001
	0.688705	15.1515	32.7135	43.3884	50.551	56.1983	0.727754	4.36652	10.0562	16.2752	23.0235	29.6394		0.963855	12.4699	25.3614	33.8554	41.2651	45.7229	0.821049	3.13491	7.37078	12.7449	19.164	25.0793		0.213789	11.705	25.4409	33.9925	41.5286	45.8044	1.05386	3.9959	10.1581	18.1206	26.654	34.9678		0.963855	12.4699	25.3614	33.8554	41.2651	45.7229	0.821049	3.13491	7.37078	12.7449
	2.0339	7.45763	11.1864	13.2203	15.9322	17.2881	2.77778	6.17284	10.4938	15.4321	20.7305	26.6461		0.865801	4.22078	7.79221	10.3896	12.7706	15.368	2.50953	4.5108	7.71919	10.8005	13.0241	15.8831		1.1544	4.329	7.35931	10.5339	12.2655	15.2958	2.23533	4.75008	7.4511	10.5557	13.7224	16.2993		0.865801	4.22078	7.79221	10.3896	12.7706	15.368	2.50953	4.5108	7.71919	10.8005
	1.96721	4.59016	6.55738	8.52459	9.83607	10.4918	1.99166	16.4891	24.9189	30.6623	35.9889	40.8986		0.469263	4.31722	9.71375	15.4388	21.2107	25.7626	1.16845	7.20545	12.853	16.7478	20.1558	24.2454		0.27137	3.41474	8.79692	14.4731	20.692	25.8254	1.05018	6.30105	11.6103	15.986	18.8448	21.8786		0.469263	4.31722	9.71375	15.4388	21.2107	25.7626	1.16845	7.20545	12.853	16.7478
	1.18964	3.63891	8.50245	14.6256	20.3289	25.8223	0.788436	1.83968	4.3364	6.5703	8.93561	9.98686		0.821065	3.80804	10.6031	18.7571	27.4066	35.3766	0.223131	0.52064	1.41316	3.04946	4.27668	5.54109		0.810745	3.86012	10.6607	20.3654	30.3969	39.2788	1.41405	3.35837	6.0981	7.90985	10.4728	12.6823		0.821065	3.80804	10.6031	18.7571	27.4066	35.3766	0.223131	0.52064	1.41316	3.04946
	0	3.21839	12.1839	18.1609	21.6092	27.3563	0.680272	0.680272	0.680272	0.680272	0.680272	0.680272		0.318979	4.30622	10.6858	15.63	20.8931	26.1563	0.147656	0.959764	2.28867	3.58066	4.87265	6.20155		0	4.60526	8.77193	12.9386	18.2018	21.7105	0.365297	2.00913	3.10502	3.83562	4.10959	4.47489		0.318979	4.30622	10.6858	15.63	20.8931	26.1563	0.147656	0.959764	2.28867	3.58066
	1.73536	9.11063	15.0759	18.7636	21.1497	24.7289	0	4	8	8	8	8		6.31365	14.8676	15.6823	18.7373	20.5703	21.5886	0.210526	3.57895	8.21053	12.6316	16.7368	18.3158		4.06091	15.2284	17.2589	17.7665	19.797	19.797	0	4.05933	12.0999	17.4863	21.7799	24.9805		6.31365	14.8676	15.6823	18.7373	20.5703	21.5886	0.210526	3.57895	8.21053	12.6316
	2.33139	6.2448	10.5745	14.6545	17.3189	21.0658	0	0	1.87891	2.92276	5.01044	6.68058		1.65714	5.62857	11.6857	17.1143	21.8571	27.3429	0	0.722892	2.6506	5.78313	7.71084	10.1205		2.75172	10.6817	20.738	30.2689	39.9375	48.1051	0	0.36855	3.00983	6.51106	9.70516	12.5921		1.65714	5.62857	11.6857	17.1143	21.8571	27.3429	0	0.722892	2.6506	5.78313
	0.536913	1.07383	2.95302	5.77181	8.45638	11.4094	0	1.19403	8.35821	17.1642	23.4328	28.9552		1.90736	8.70637	18.5675	28.7401	36.4085	44.492	0.132057	5.00715	19.7095	34.5218	46.7371	55.86		3.68507	12.3018	22.6681	34.5763	44.5708	53.3188	0.0278435	5.16497	18.4324	30.9202	41.6539	50.007		1.90736	8.70637	18.5675	28.7401	36.4085	44.492	0.132057	5.00715	19.7095	34.5218
	1.68303	3.92707	7.223	9.46704	11.5708	15.7784	2.25564	6.95489	10.9023	12.406	15.6015	17.6692		2.43599	8.23257	16.4651	23.7731	31.4011	38.638	0.47619	1.42857	10.7143	15.7143	18.8095	21.4286		2.94639	7.86442	14.8427	21.3779	27.4922	33.4958	1.22699	4.29448	7.15746	7.97546	10.0204	11.2474		2.43599	8.23257	16.4651	23.7731	31.4011	38.638	0.47619	1.42857	10.7143	15.7143
	3.22108	11.0542	17.6428	22.328	25.6955	29.8682	4.80338	9.38278	14.4102	19.4375	25.0373	32.1802		2.12202	10.7095	18.1034	23.939	28.382	33.4549	6.06616	12.8651	21.9338	31.5013	41.5471	51.3079		2.32558	12.7132	21.7313	28.9406	34.1602	39.2506	3.62931	8.39991	15.9781	25.1997	34.2502	44.1566		2.12202	10.7095	18.1034	23.939	28.382	33.4549	6.06616	12.8651	21.9338	31.5013
	5.7971	14.4928	20.2899	23.1884	27.5362	27.5362	0	0	0	0	0	0		0.321802	11.5849	26.3677	37.148	46.2792	52.9968	0	0	0	0	0	0		0.430478	11.3646	21.61	30.1334	36.978	41.8424	0	0	0	0	0	0.353357		0.321802	11.5849	26.3677	37.148	46.2792	52.9968	0	0	0	0
	0	2.32558	5.15988	7.19477	10.0291	13.0087	0.308642	0.308642	0.308642	0.308642	0.925926	1.54321		0.417101	2.39833	4.17101	5.73514	7.29927	8.8634	0	0	0	0.883002	1.3245	3.09051		0	2.2093	4.53488	6.51163	7.44186	8.83721	0	0.511509	0.767263	1.79028	2.94118	3.19693		0.417101	2.39833	4.17101	5.73514	7.29927	8.8634	0	0	0	0.883002
	4.87805	12.1951	12.1951	12.1951	12.1951	12.1951	0.852273	1.70455	5.25568	9.09091	10.2273	13.6364		1.68472	7.28039	11.9134	14.1998	16.8472	20.5174	0.335008	1.50754	3.18258	4.85762	8.0402	9.71524		0.803213	5.62249	10.0402	10.8434	11.6466	12.8514	0.344828	1.2069	3.87931	5.68966	8.10345	9.39655		1.68472	7.28039	11.9134	14.1998	16.8472	20.5174	0.335008	1.50754	3.18258	4.85762
	0	11.1111	11.1111	11.1111	11.1111	11.1111	2.44281	21.0417	42.6134	57.1539	67.9979	76.1018		0.169779	4.9236	11.2903	15.4499	19.0153	22.4109	1.85212	15.5578	34.2751	49.6659	61.2071	70.2135		0	5.12821	11.1888	13.0536	16.317	17.9487	2.37157	18.5715	38.3116	52.2506	63.4792	72.4331		0.169779	4.9236	11.2903	15.4499	19.0153	22.4109	1.85212	15.5578	34.2751	49.6659
	0.310559	5.22774	13.4576	20.1863	26.1387	33.5404	0.322581	0.967742	6.29032	9.03226	13.0645	17.0968		0.443577	7.98439	22.2853	32.8779	43.7367	52.6615	1.31579	7.23684	12.5	15.7895	17.4342	19.4079		0.370885	5.4242	11.6365	17.0607	22.0213	26.3792	0.27933	1.11732	8.24022	11.4525	13.6872	14.8045		0.443577	7.98439	22.2853	32.8779	43.7367	52.6615	1.31579	7.23684	12.5	15.7895
	1.22783	4.36562	8.18554	13.8472	20.3274	25.5798	4.18354	5.93792	7.01754	10.2564	12.9555	15.7895		1.33143	5.99144	12.5059	17.166	21.826	26.1056	2.3976	5.79421	8.64136	11.7383	14.2857	16.6833		1.0101	5.05051	11.7003	18.3502	23.6813	28.6476	2.46656	6.52174	9.699	13.1271	15.9281	18.8963		1.33143	5.99144	12.5059	17.166	21.826	26.1056	2.3976	5.79421	8.64136	11.7383
	0	0	0	0	0	0	0	4.16667	14.5833	17.3611	20.1389	22.9167		0.267142	1.5138	2.84951	3.56189	4.27427	5.43188	0.4914	4.6683	11.7936	14.742	17.199	21.6216		0	0	0	0	3.125	3.125	0	1.29032	3.87097	5.80645	9.35484	12.5806		0.267142	1.5138	2.84951	3.56189	4.27427	5.43188	0.4914	4.6683	11.7936	14.742
	0	0	0	0	0	0	4.75537	12.3457	17.8784	22.9081	27.6177	31.5043		2.1692	5.20607	9.97831	10.4121	11.4967	11.9306	3.92235	9.42566	15.5093	20.3322	25.075	30.2782		2.27273	6.81818	15.9091	19.3182	19.3182	20.4545	3.64322	9.48492	16.227	20.959	25.7956	29.8576		2.1692	5.20607	9.97831	10.4121	11.4967	11.9306	3.92235	9.42566	15.5093	20.3322
	5.45455	9.09091	20.9091	20.9091	28.1818	33.6364	0	0.547196	1.91518	3.14637	5.33516	8.07114		0.898204	11.6766	20.3593	24.7006	27.2455	31.4371	0	0.730594	2.73973	3.83562	5.75342	6.94064		0	4.34783	8.69565	8.69565	14.1304	17.3913	0	0.575705	2.76339	4.26022	6.33276	8.34773		0.898204	11.6766	20.3593	24.7006	27.2455	31.4371	0	0.730594	2.73973	3.83562
	3.43434	8.68687	13.1313	16.7677	20.8081	22.4242	0	0	0	0	0	0		1.75747	5.9754	9.31459	9.49033	11.9508	13.0053	0	0	0	0	0	0		1.04712	4.18848	7.50436	10.3839	11.9546	15.096	0	0	0	0	0	0		1.75747	5.9754	9.31459	9.49033	11.9508	13.0053	0	0	0	0
	0	0	1.32159	3.0837	3.96476	3.96476	0.281294	0.562588	1.40647	2.25035	3.09423	4.5007		0	0.32	0.96	2.24	3.68	6.56	0.484457	1.1304	1.77634	2.50303	3.18934	4.36011		0.17094	0.512821	2.22222	3.93162	6.83761	8.97436	0.634633	1.54125	1.99456	2.67452	3.6718	4.48776		0	0.32	0.96	2.24	3.68	6.56	0.484457	1.1304	1.77634	2.50303
	1.38408	2.76817	3.46021	4.15225	4.84429	6.22837	0	1.71359	5.38556	11.7503	14.4431	17.8703		0.554017	3.23176	5.26316	7.01754	9.23361	11.819	0	0.819672	3.27869	4.91803	5.7377	6.55738		0.854701	2.35043	3.84615	4.2735	5.98291	8.54701	0.324675	1.2987	2.43506	5.19481	6.81818	8.92857		0.554017	3.23176	5.26316	7.01754	9.23361	11.819	0	0.819672	3.27869	4.91803
	0	0.817661	3.76124	7.84955	13.0826	17.9886	0.519481	1.2987	2.85714	3.37662	3.8961	4.93506		0	0	2.58541	6.74054	11.0803	14.5891	0	0.881057	2.7533	4.84581	6.60793	8.81057		0	0.560224	2.2409	3.64146	4.7619	7.28291	0	0.950119	2.49406	4.51306	7.12589	8.55107		0	0	2.58541	6.74054	11.0803	14.5891	0	0.881057	2.7533	4.84581
	10.4575	20.915	23.8562	24.5098	27.1242	27.7778	0	0	0	0	0	0		10.2655	24.7788	30.0885	33.4513	35.3982	36.6372	0	0	0.304878	0.914634	1.52439	2.7439		8.56898	18.4233	26.0497	29.563	31.6195	34.1902	0	0	0	0	0	1.74292		10.2655	24.7788	30.0885	33.4513	35.3982	36.6372	0	0	0.304878	0.914634
	0	2.1978	6.59341	10.989	13.1868	17.5824	0.332226	2.15947	2.65781	3.48837	4.15282	4.81728		0	2.1164	8.64198	14.6384	17.8131	20.9877	0.285987	1.66826	3.38418	4.71878	5.91039	6.62536		0	2.40964	7.22892	16.8675	21.6867	24.0964	0.166806	1.08424	2.33528	3.83653	4.33695	4.75396		0	2.1164	8.64198	14.6384	17.8131	20.9877	0.285987	1.66826	3.38418	4.71878
	0	7.69231	7.69231	7.69231	7.69231	7.69231	1.23077	1.84615	2.46154	2.46154	2.46154	2.46154		0	1.39165	6.36183	10.7356	12.5249	13.7177	0.769231	1.73077	2.69231	3.26923	3.65385	4.23077		8.97436	12.3932	13.6752	17.5214	18.3761	19.2308	0.497512	1.24378	1.49254	1.99005	1.99005	1.99005		0	1.39165	6.36183	10.7356	12.5249	13.7177	0.769231	1.73077	2.69231	3.26923
	3.57542	15.1955	21.3408	25.9218	27.933	31.5084	0	3.84615	13.4615	15.3846	15.3846	15.3846		1.39616	9.30774	15.2414	19.1972	21.5241	24.7818	0.90009	2.16022	4.23042	7.20072	11.7912	15.2115		2.46046	8.55302	13.9426	16.3445	18.512	21.324	0.10543	1.26516	3.9009	7.85451	12.6516	16.9215		1.39616	9.30774	15.2414	19.1972	21.5241	24.7818	0.90009	2.16022	4.23042	7.20072
	10.8587	27.7562	37.0083	42.1607	46.5374	50.0831	3.85953	9.04033	14.395	21.4882	27.8512	34.0751		7.8775	27.0062	42.1553	52.3911	59.3351	64.2974	6.36314	14.0428	24.6407	34.9424	43.774	52.2984		10.2129	29.5309	40.0208	47.7064	53.3668	57.7982	4.62941	11.0703	19.82	30.0497	39.0126	46.5309		7.8775	27.0062	42.1553	52.3911	59.3351	64.2974	6.36314	14.0428	24.6407	34.9424
	0	0	0	0	0	0	0.257235	2.9582	7.97428	13.4084	20.2894	28.1672		0.181324	1.26927	3.44515	8.25023	10.8794	12.602	0.285714	1.22449	4.18367	8.73469	15.102	21.5714		0	1.07817	3.2345	5.39084	7.27763	8.89488	0	0.663962	2.25009	5.68056	11.0291	16.2671		0.181324	1.26927	3.44515	8.25023	10.8794	12.602	0.285714	1.22449	4.18367	8.73469
	0	2.28137	15.5894	23.1939	25.8555	27.3764	0	7.01754	11.4035	20.1754	23.6842	23.6842		0	1.60681	6.23819	12.5709	15.879	20.2268	0	2.9703	8.91089	14.3564	18.3168	20.297		0	3.22581	8.52535	12.212	14.5161	16.129	0	0	3.89105	10.5058	13.6187	14.3969		0	1.60681	6.23819	12.5709	15.879	20.2268	0	2.9703	8.91089	14.3564
	0	0.124533	3.05106	8.71731	15.3176	24.7198	0	1.14068	2.91508	5.06971	8.49176	11.6603		0	0.704225	2.11268	4.57746	6.33803	7.04225	0.173461	0.346921	1.60451	3.42585	4.81353	7.4588		0	0.803859	4.66238	10.0482	17.6045	25.5627	0	0.319602	1.66903	4.01278	6.64062	9.19744		0	0.704225	2.11268	4.57746	6.33803	7.04225	0.173461	0.346921	1.60451	3.42585
	0	0	0	0	0.904977	0.904977	1.15218	2.73644	6.48104	9.40951	13.8262	16.9467		0	0.416667	4.58333	6.04167	6.66667	7.08333	0.611933	2.54972	5.09944	8.00612	9.89291	11.5757		0	0	1.60321	2.80561	2.80561	3.80762	0.658256	1.53593	4.25123	7.02139	9.57213	12.836		0	0.416667	4.58333	6.04167	6.66667	7.08333	0.611933	2.54972	5.09944	8.00612
	2.30548	25.9366	40.2017	50	55.1873	59.366	0	0	0	0	2.10526	2.10526		3.13339	24.4405	39.3017	46.5533	50.4924	53.7153	0	0.301659	2.41327	4.52489	6.33484	6.6365		2.53556	26.9017	42.4242	51.4533	57.0192	60.6679	0	0	0	1.0582	1.0582	2.1164		3.13339	24.4405	39.3017	46.5533	50.4924	53.7153	0	0.301659	2.41327	4.52489
	0	0	0	0	2.55319	2.55319	0	0	0	0	0	0		0	0	2.45787	5.6882	8.56742	10.7444	0	0.170213	0.93617	1.87234	2.38298	3.23404		0	0.742115	4.82375	7.23562	9.83302	12.4304	0	0	0.251572	0.754717	1.50943	2.26415		0	0	2.45787	5.6882	8.56742	10.7444	0	0.170213	0.93617	1.87234
	0.0686106	1.09777	9.87993	23.5334	35.3688	46.5523	0	5	5	10	10	10		0.0391083	0.743058	7.99765	18.9089	28.0407	35.569	0	1.04058	1.66493	3.53798	4.9948	6.55567		0	0.549133	7.31214	21.0116	33.5838	42.8613	0	0.83632	2.15054	4.77897	6.09319	8.96057		0.0391083	0.743058	7.99765	18.9089	28.0407	35.569	0	1.04058	1.66493	3.53798
	0	0.536193	2.68097	4.82574	6.43432	9.91957	0	0	0	0.987654	2.46914	3.45679		0	0.530504	4.24403	7.95756	14.8541	16.1804	0.285307	1.14123	1.99715	2.28245	3.13837	4.56491		0	0.982801	4.4226	5.89681	6.87961	7.37101	0	0	1.10497	1.10497	2.20994	2.20994		0	0.530504	4.24403	7.95756	14.8541	16.1804	0.285307	1.14123	1.99715	2.28245
	0.112296	2.13363	5.05334	7.52386	9.5452	12.3526	1.31435	3.06681	6.13363	8.10515	11.0624	13.253		0.0627353	2.44668	4.04642	6.86951	9.00251	11.01	4.95264	10.3112	16.0487	21.5697	26.7659	31.9621		0.392349	1.86366	3.08975	4.36488	5.54193	7.20942	3.70836	7.54243	12.665	16.9076	21.5902	25.6442		0.0627353	2.44668	4.04642	6.86951	9.00251	11.01	4.95264	10.3112	16.0487	21.5697
	0	0.598205	1.89432	2.89133	5.98205	9.47159	0	0.847009	3.22922	8.09952	11.3817	14.1345		0.102722	1.12994	4.98202	8.11505	12.5835	16.2815	0.312012	1.56006	4.21217	7.33229	8.11232	9.36037		0.298507	0.597015	1.19403	3.43284	4.62687	8.20896	0.0972763	0.77821	2.77237	4.62062	6.1284	7.83074		0.102722	1.12994	4.98202	8.11505	12.5835	16.2815	0.312012	1.56006	4.21217	7.33229
	0	2.05479	2.05479	3.42466	3.42466	5.13699	2.25131	8.01047	16.2304	22.7225	26.5445	30.6806		0	1.0101	3.0303	3.0303	3.0303	4.0404	0.582242	4.80349	12.6346	17.8457	21.9214	25.4731		0	0.561798	2.24719	2.24719	2.24719	2.24719	0.384911	5.6582	11.047	15.281	18.3988	21.0162		0	1.0101	3.0303	3.0303	3.0303	4.0404	0.582242	4.80349	12.6346	17.8457
	0	2.56798	14.0483	21.2991	26.284	30.0604	0.759013	1.13852	1.89753	2.65655	3.41556	5.88235		0.243457	3.77358	10.2252	13.8771	17.3463	23.0676	0.1221	0.3663	0.854701	1.4652	2.74725	4.33455		0	3.28152	6.73575	10.6218	14.2487	17.4439	0	0.267023	0.267023	0.267023	0.267023	1.60214		0.243457	3.77358	10.2252	13.8771	17.3463	23.0676	0.1221	0.3663	0.854701	1.4652
	0	0	0	0	0	0	0	3.28767	9.86301	12.3288	14.5205	15.8904		0	0	0	0	0	0.540541	0	8.04348	13.4783	16.3043	16.9565	18.0435		0	0.645161	0.645161	0.645161	0.645161	1.29032	0	4.94418	8.93142	10.5263	13.3971	15.63		0	0	0	0	0	0.540541	0	8.04348	13.4783	16.3043
	0.298954	4.78326	8.81913	12.7055	15.994	17.0404	1.67598	3.91061	7.5419	10.8939	12.4767	13.8734		1.04712	6.5683	13.5174	19.4669	24.2742	28.415	0.876601	4.04585	8.76601	12.6096	15.9137	19.4201		1.19306	6.94143	14.154	19.6855	23.102	26.6269	0.880626	3.7182	6.31115	8.41487	11.2035	13.0137		1.04712	6.5683	13.5174	19.4669	24.2742	28.415	0.876601	4.04585	8.76601	12.6096
	0.706402	1.89845	4.23841	6.40177	9.05077	11.9205	4.74308	13.0215	22.6834	33.3773	44.5323	53.6012		1.22871	3.09969	5.24993	7.65149	10.9467	13.2924	3.6576	9.76093	19.9515	31.1116	41.5556	50.5894		1.16129	2.73118	4.7957	7.50538	10.8602	14.0645	5.57581	14.4328	25.831	36.4036	45.9575	54.1711		1.22871	3.09969	5.24993	7.65149	10.9467	13.2924	3.6576	9.76093	19.9515	31.1116
	0.595238	3.27381	5.65476	11.0119	13.3929	14.5833	0	3.0303	4.84848	6.66667	10	12.1212		0.277393	6.01017	12.8988	18.4004	22.2839	25.6588	0.831025	3.25485	6.30194	8.17175	10.3878	13.5042		1.34116	10.6454	18.9438	25.5658	31.2657	35.4149	0.78125	3.57143	8.31473	11.4955	15.6808	18.9174		0.277393	6.01017	12.8988	18.4004	22.2839	25.6588	0.831025	3.25485	6.30194	8.17175
	0.178094	5.25378	11.309	17.5423	21.2823	24.3099	17.6495	35.2023	48.9573	60.1712	68.5541	75.6802		0.0462321	3.95284	12.945	22.0989	30.3282	37.1937	22.0188	43.9701	60.689	72.3826	80.8721	86.8851		0.230814	6.20312	16.0415	24.7259	30.929	35.7184	19.2688	38.4682	53.405	65.1534	73.6325	80.6504		0.0462321	3.95284	12.945	22.0989	30.3282	37.1937	22.0188	43.9701	60.689	72.3826
	0	1.41498	8.63625	17.8824	25.6404	33.1788	3.94011	7.64381	13.3964	19.4641	24.4287	28.9204		0.0279174	0.558347	4.32719	10.0223	15.3546	21.4685	3.33993	9.74765	16.8481	22.86	29.1192	34.9827		0	1.3114	7.59058	15.7702	24.1165	32.7406	2.23124	6.84584	11.2069	16.8864	21.1968	24.9493		0.0279174	0.558347	4.32719	10.0223	15.3546	21.4685	3.33993	9.74765	16.8481	22.86
	0	3.36943	9.74729	13.3574	18.1709	20.4573	2.36941	5.92353	9.58535	13.301	17.2859	21.3786		0.0784621	3.09925	10.5139	17.1832	21.3417	24.8725	2.67892	5.8858	9.42511	15.3305	20.6688	26.9652		0.217984	3.59673	8.33787	12.4796	16.2943	18.5831	3.74917	7.36563	11.0816	14.0677	18.0491	21.5328		0.0784621	3.09925	10.5139	17.1832	21.3417	24.8725	2.67892	5.8858	9.42511	15.3305
	0	4.65116	23.2558	27.907	27.907	32.5581	0.413116	3.56313	10.8443	18.5386	27.1108	35.9411		0	4.45946	13.1081	21.0811	29.1892	35	0.397902	5.00995	12.5701	21.0165	29.1011	35.2143		0	3.66972	10.0917	10.0917	15.1376	16.9725	0.324224	3.52015	6.85503	10.7226	15.2617	19.5924		0	4.45946	13.1081	21.0811	29.1892	35	0.397902	5.00995	12.5701	21.0165
	0	0	0	0	0	0	0	0	0	4.0404	4.0404	4.0404		0	3.3105	9.13242	10.9589	13.0137	15.7534	0	0	0.39604	1.18812	2.0462	3.9604		0	3.95257	9.88142	12.6482	15.0198	15.8103	0	0.325733	1.14007	2.1987	4.88599	6.84039		0	3.3105	9.13242	10.9589	13.0137	15.7534	0	0	0.39604	1.18812
	0.374181	7.10945	11.319	12.9093	15.2479	16.8382	1.99501	7.98005	10.7232	11.4713	11.4713	12.7182		0.805153	7.32689	9.9839	12.8019	14.3317	16.3446	0.322061	3.54267	4.83092	5.7971	6.76329	7.08535		0.323102	5.22348	9.04685	11.0393	14.378	17.1244	2.20386	7.16253	11.0193	12.3967	14.0496	14.6006		0.805153	7.32689	9.9839	12.8019	14.3317	16.3446	0.322061	3.54267	4.83092	5.7971
	5.34759	17.1123	20.3209	25.6684	34.7594	36.3636	1.97044	7.88177	12.4795	14.4499	16.092	17.4056		8.15308	23.2945	32.1131	39.4343	42.4293	45.9235	2.20662	7.42227	9.92979	12.1364	13.5406	14.8445		6.30769	21.3846	27.6923	32.9231	36.3077	41.2308	4.09207	11.2532	14.237	15.601	17.4766	18.3291		8.15308	23.2945	32.1131	39.4343	42.4293	45.9235	2.20662	7.42227	9.92979	12.1364
	3.125	12.5	18.75	18.75	18.75	21.875	0	0.689061	1.98105	2.84238	6.71835	8.441		3.11688	10.1299	15.7143	19.0909	23.2468	26.4935	0.372439	1.67598	2.7933	5.77281	6.51769	7.63501		1.24224	8.07453	13.6646	14.9068	16.4596	18.323	0	0.497512	3.48259	5.47264	6.46766	6.96517		3.11688	10.1299	15.7143	19.0909	23.2468	26.4935	0.372439	1.67598	2.7933	5.77281
	5.12821	20.5128	20.5128	20.5128	20.5128	20.5128	0.947867	9.47867	10.9005	14.218	17.0616	18.0095		0.756144	9.07372	17.3913	22.4953	27.0321	31.38	0.481155	3.04731	6.97674	9.30233	13.5525	16.0385		1.03627	6.21762	11.399	12.4352	15.544	16.5803	0.252525	2.52525	5.42929	8.20707	9.97475	11.6162		0.756144	9.07372	17.3913	22.4953	27.0321	31.38	0.481155	3.04731	6.97674	9.30233
	0	1.8018	2.4024	3.003	4.5045	6.00601	0.816327	2.04082	5.30612	8.57143	11.0204	11.0204		0	1.0598	2.27101	4.92051	6.66162	8.55413	2.89093	8.01577	14.4766	20.3898	26.1279	31.4936		0	0.49597	2.97582	5.39368	7.81153	10.5394	4.09323	9.30453	15.596	22.3991	28.8611	34.6788		0	1.0598	2.27101	4.92051	6.66162	8.55413	2.89093	8.01577	14.4766	20.3898
	0	0.934579	8.41121	13.3178	22.1963	30.3738	2.2541	7.27459	11.7828	15.3689	18.2377	21.209		0.539084	2.42588	11.0512	18.5984	23.4501	29.3801	1.15385	6.25	10	11.4423	12.3077	14.8077		0	0	2.95699	11.2903	18.8172	22.8495	0.174825	5.68182	8.91608	10.9266	11.7133	13.0245		0.539084	2.42588	11.0512	18.5984	23.4501	29.3801	1.15385	6.25	10	11.4423
	0.509554	3.82166	7.26115	11.465	14.5223	17.707	2.28571	5.71429	8.42857	10.8571	14.1429	17.1429		0.497512	5.47264	12.1891	16.1692	20.398	23.1343	1.64573	4.28757	8.44521	11.6934	15.0715	18.4495		0	7.40741	12.037	13.8889	15.7407	17.5926	1.81818	5.45455	9.4697	12.4242	14.8485	16.8939		0.497512	5.47264	12.1891	16.1692	20.398	23.1343	1.64573	4.28757	8.44521	11.6934
	7.54717	11.3208	11.3208	11.3208	11.3208	11.3208	1.50376	1.50376	1.50376	3.00752	3.00752	4.51128		1.44274	8.74662	15.1488	21.1001	26.2399	30.7484	0.386225	1.41616	4.28066	7.2739	11.0396	14.2903		0	1.52672	4.58015	4.58015	4.58015	4.58015	0.42707	3.58081	9.28055	16.1629	22.9632	29.0407		1.44274	8.74662	15.1488	21.1001	26.2399	30.7484	0.386225	1.41616	4.28066	7.2739
	0	0.763359	3.30789	7.63359	13.7405	18.0662	0	0.776197	3.49288	5.95084	6.46831	7.2445		0	1.29032	5.05376	9.67742	13.5484	18.9247	0.195886	2.05681	4.01567	7.14985	7.9334	8.71694		0	1.18421	5.32895	11.0526	18.2895	24.8026	0.524934	2.09974	3.14961	4.19948	4.72441	5.24934		0	1.29032	5.05376	9.67742	13.5484	18.9247	0.195886	2.05681	4.01567	7.14985
	34.6847	63.5135	68.9189	68.9189	71.6216	71.6216	0	0	0	0	0	0		32.7957	58.0645	62.3656	65.0538	65.0538	65.0538	0.344828	1.55172	2.58621	2.75862	3.44828	4.48276		20.8779	44.2184	50.4283	55.2463	56.1028	57.8158	0	0	0	0.888889	0.888889	0.888889		32.7957	58.0645	62.3656	65.0538	65.0538	65.0538	0.344828	1.55172	2.58621	2.75862
	0.438596	5.48246	11.1842	17.9825	23.0263	28.0702	0.378072	0.378072	1.89036	3.40265	7.18336	12.6654		0.485437	4.55097	12.1359	19.5995	25.5461	31.1893	0.343053	1.02916	2.01544	3.21612	6.38937	11.235		0.996775	5.27704	16.3882	26.3266	35.5907	42.4509	0.387347	0.645578	1.03292	2.96966	5.48741	10.2001		0.485437	4.55097	12.1359	19.5995	25.5461	31.1893	0.343053	1.02916	2.01544	3.21612
	0.970874	3.55987	8.49515	13.0259	16.1812	19.2557	0.256575	6.06158	18.762	30.9173	39.5767	46.2476		1.83416	5.92281	10.0879	12.8009	16.2782	20.5961	0.265252	5.1061	12.5332	17.5729	20.6233	23.2759		1.07562	5.76923	10.2021	14.6349	18.5137	22.0991	0.425532	5.57447	11.7872	16.0426	20.0426	23.5319		1.83416	5.92281	10.0879	12.8009	16.2782	20.5961	0.265252	5.1061	12.5332	17.5729
	0.638978	17.8914	30.6709	38.9776	45.6869	50.1597	0.394477	2.5641	5.52268	8.28402	11.0454	13.4122		1.60643	18.7416	33.8688	43.3735	48.5944	52.7443	1.00091	3.86715	9.09918	11.8744	14.8772	17.2429		1.2474	14.553	25.1559	32.6403	38.2536	42.2037	0.590717	3.62869	8.94515	13.5021	16.7089	18.481		1.60643	18.7416	33.8688	43.3735	48.5944	52.7443	1.00091	3.86715	9.09918	11.8744
	0	7.10784	25.9804	36.6422	43.1373	50.4902	1.1611	2.46734	4.35414	5.22496	7.54717	8.27286		0.218579	9.94536	23.4973	34.0984	41.3115	45.7923	1.17578	2.76308	4.29159	6.23163	8.81834	10.9935		0	8.50694	23.7847	36.875	46.25	52.7778	0.617522	2.66306	4.94018	7.64184	9.80316	11.6943		0.218579	9.94536	23.4973	34.0984	41.3115	45.7923	1.17578	2.76308	4.29159	6.23163
	0	3.57143	3.57143	7.14286	7.14286	14.2857	5.91377	12.4762	18.657	24.0748	30.4082	34.6814		0	2.24267	9.89074	16.9063	24.8994	30.8223	5.74761	11.8134	18.3245	24.1145	28.7593	34.3372		0	1.5625	7.42188	14.0625	15.625	17.9688	3.01966	7.19803	12.2191	16.5028	19.9438	22.823		0	2.24267	9.89074	16.9063	24.8994	30.8223	5.74761	11.8134	18.3245	24.1145
	1.59716	7.18722	11.7125	14.4632	16.4153	19.0772	0.598355	2.09424	6.13313	11.9671	15.258	19.2221		2.07101	8.08679	13.856	17.0611	20.0197	21.3511	1.99769	5.10949	9.10488	14.3296	19.8233	23.7803		2.42331	13.865	19.7239	24.2945	27.5153	30.4294	1.05932	3.38983	6.46186	9.16314	12.6589	15.7309		2.07101	8.08679	13.856	17.0611	20.0197	21.3511	1.99769	5.10949	9.10488	14.3296
	0.222965	3.01003	6.83761	11.2226	17.2798	23.2256	0.204569	1.22741	4.33004	8.45551	13.672	20.0818		0	2.54958	6.51558	9.63173	12.1813	13.881	0.243605	1.46163	2.80146	4.26309	5.11571	6.82095		0.364299	4.70553	9.13783	13.6308	18.5792	23.5276	0.186683	0.933416	2.67579	5.32047	8.30741	11.8233		0	2.54958	6.51558	9.63173	12.1813	13.881	0.243605	1.46163	2.80146	4.26309
	2.29358	14.2202	20.6422	22.0183	22.9358	23.3945	1.00063	4.94059	7.75485	10.444	14.1964	18.1363		7.02576	16.6276	18.5012	19.9063	19.9063	19.9063	0.988468	3.95387	5.60132	6.91928	8.56672	10.7908		4.64286	17.6786	20.5357	22.3214	22.3214	23.75	0	0.76746	1.8419	2.91635	3.53031	6.36992		7.02576	16.6276	18.5012	19.9063	19.9063	19.9063	0.988468	3.95387	5.60132	6.91928
	0	15.3846	23.9316	29.4872	32.4786	32.4786	0.257843	0.945423	3.39493	9.0245	17.7052	27.1594		0.102171	8.63346	23.6782	35.6066	43.857	50.9068	3.91404	8.64671	14.5306	24.1878	34.8555	44.9476		0.551724	11.5172	25.069	34.7931	41.6897	47.5172	2.24048	6.15385	12.1882	20.6572	30.5153	40.8364		0.102171	8.63346	23.6782	35.6066	43.857	50.9068	3.91404	8.64671	14.5306	24.1878
	1.2959	9.93521	18.3585	22.6782	27.6458	30.8855	0.316814	1.83299	7.78457	19.484	30.1426	41.7742		2.60681	8.68936	17.7408	24.7647	30.1231	34.6126	0.499168	0.998336	3.05047	5.51858	8.18081	11.9246		2.3242	8.99881	17.3421	26.2217	32.4791	38.2002	0.519211	1.69609	4.72482	10.0208	16.7705	22.6376		2.60681	8.68936	17.7408	24.7647	30.1231	34.6126	0.499168	0.998336	3.05047	5.51858
	0	0	0	0	2.06186	2.06186	0	1.43541	2.39234	2.39234	2.39234	2.39234		0.469208	5.48387	12.0821	18.0938	23.4311	28.1525	0.479042	0.479042	1.1976	2.63473	3.11377	4.07186		0.492005	4.18204	6.88807	9.22509	10.4551	11.1931	0.275482	0.826446	2.47934	3.16804	3.99449	3.99449		0.469208	5.48387	12.0821	18.0938	23.4311	28.1525	0.479042	0.479042	1.1976	2.63473
	0	2.29885	11.4943	14.3678	15.5172	16.092	0.940291	3.99624	8.18054	11.2835	15.985	19.9812		0.251678	3.73322	12.0386	19.0436	26.8456	31.2919	1.23967	2.89256	5.02755	7.78237	9.98623	12.3278		0.111297	2.67112	8.84808	15.5259	19.9777	24.7078	0.702494	2.17773	4.70671	8.00843	11.8721	14.928		0.251678	3.73322	12.0386	19.0436	26.8456	31.2919	1.23967	2.89256	5.02755	7.78237
	0.475059	4.51306	10.768	17.023	21.2985	25.4157	3.34728	7.62436	11.6225	16.5969	19.4328	24.6397		0.301659	2.71493	8.74811	12.8205	16.2896	17.0437	4.05621	7.88885	11.6896	16.2568	19.5465	23.2194		0	2.90038	7.4401	11.7276	12.9887	14.7541	4.61333	11.0096	16.4252	21.1946	25.4736	30.0201		0.301659	2.71493	8.74811	12.8205	16.2896	17.0437	4.05621	7.88885	11.6896	16.2568
	0	0	1.1236	1.1236	2.24719	4.49438	2.72109	3.80952	4.89796	6.53061	9.79592	11.2925		0.488599	4.23453	7.49186	10.0163	13.7622	16.7752	1.94049	3.55757	6.27426	8.60285	11.6429	13.7128		0.435414	4.64441	10.0871	12.1916	15.0943	17.7068	2.08092	3.75723	5.83815	7.68786	9.30636	10.9827		0.488599	4.23453	7.49186	10.0163	13.7622	16.7752	1.94049	3.55757	6.27426	8.60285
	0.309119	6.95518	12.2102	17.7743	21.1747	22.5657	0	4.70852	10.5381	14.3498	17.9372	19.7309		0	6.98152	12.115	14.3737	16.6324	18.0698	0	3.2113	8.63841	13.8728	18.5292	22.6718		0.366972	3.66972	7.52294	11.5596	13.211	13.7615	0	10.4247	17.3745	21.6216	23.166	23.166		0	6.98152	12.115	14.3737	16.6324	18.0698	0	3.2113	8.63841	13.8728
	0	3.99113	11.5299	16.408	18.847	21.0643	0	13.3333	13.3333	13.3333	13.3333	13.3333		0	0.83682	4.85356	7.94979	11.5481	13.8912	0	6.12691	12.6915	14.8796	17.7243	21.0066		0	3.125	3.90625	6.40625	9.21875	10.7812	0	1.65289	4.95868	4.95868	6.61157	6.61157		0	0.83682	4.85356	7.94979	11.5481	13.8912	0	6.12691	12.6915	14.8796
	1.75439	6.14035	13.1579	17.5439	21.0526	22.807	0.0886525	1.06383	4.29965	8.7766	14.3617	17.7305		0.56926	6.926	15.2751	21.8216	26.186	29.4118	0.764331	3.43949	5.85987	8.28025	10.828	11.5924		0.502513	7.03518	17.8392	21.3568	26.6332	27.8894	0.0747664	0.373832	1.34579	2.61682	5.60748	8.41121		0.56926	6.926	15.2751	21.8216	26.186	29.4118	0.764331	3.43949	5.85987	8.28025
	0	6.45161	12.9032	12.9032	12.9032	19.3548	0	11.7647	17.6471	17.6471	17.6471	17.6471		0	2.28013	2.9316	4.56026	6.84039	7.49186	0	3.62694	8.54922	10.8808	14.2487	15.8031		0	2.03046	5.07614	6.09137	7.1066	7.1066	0.847458	8.05085	16.5254	18.2203	22.0339	22.4576		0	2.28013	2.9316	4.56026	6.84039	7.49186	0	3.62694	8.54922	10.8808
	0	0	0	0	0	0	3.33333	6.66667	10	10	10	10		1.92308	3.84615	11.0577	11.5385	13.4615	13.4615	0.176523	4.3248	6.88438	9.00265	10.5031	11.3857		0	3.77358	11.3208	11.3208	11.3208	11.3208	0.404585	2.56237	4.98989	7.55226	8.96831	10.7889		1.92308	3.84615	11.0577	11.5385	13.4615	13.4615	0.176523	4.3248	6.88438	9.00265
	0	4.10256	10.2564	13.3333	16.4103	18.1197	0.841279	7.96411	12.7874	15.9282	18.8446	20.5833		0.291971	4.67153	7.29927	11.6788	12.9927	13.5766	1.70581	8.23239	14.2151	18.4425	21.0383	23.6836		0.485437	4.85437	8.00971	10.6796	13.5922	14.0777	1.62382	9.42715	15.5841	19.373	22.756	25.5525		0.291971	4.67153	7.29927	11.6788	12.9927	13.5766	1.70581	8.23239	14.2151	18.4425
							3.69593	9.02982	13.9857	19.1936	24.7795	30.4914								2.49299	5.67155	10.2213	13.3998	17.7625	20.8788								2.30994	6.25731	11.0234	14.6199	17.2515	21.4912								2.49299	5.67155	10.2213	13.3998
							5.62771	11.9589	17.1537	21.5909	26.5152	29.4372								5.66898	12.1903	18.9098	24.8959	31.4569	37.4034								2.8964	6.60973	11.3257	16.1159	18.7523	21.7601								5.66898	12.1903	18.9098	24.8959
							0.40568	4.25963	13.9959	18.8641	22.3124	26.7748								0	4.39883	9.82405	16.4223	20.5279	22.7273								0	4.3956	11.4286	14.2857	16.4835	18.2418								0	4.39883	9.82405	16.4223
							1.94647	7.29927	10.219	10.9489	13.382	15.8151								1.65094	3.77358	7.78302	11.6745	14.033	17.0401								0.960879	3.29444	7.13795	10.3638	13.9327	16.0604								1.65094	3.77358	7.78302	11.6745
							0	1.31772	6.00293	10.2489	14.0556	15.0805								1.07143	4.28571	8.21429	12.6786	14.4643	15.7143								0.259067	3.10881	5.82902	8.54922	11.5285	12.6943								1.07143	4.28571	8.21429	12.6786
							1.25448	5.44355	14.4265	24.776	32.5269	41.3306								1.07969	3.08483	6.60668	9.35733	12.6478	14.9614								1.26822	3.64431	8.95044	15.3353	21.8076	28.1924								1.07969	3.08483	6.60668	9.35733
							0.528262	2.2187	6.49762	10.935	15.1611	19.8098								1.72533	3.79572	7.21187	10.9386	14.3547	17.9089								0.0687285	0.756014	3.67698	6.11684	9.27835	12.3711								1.72533	3.79572	7.21187	10.9386
							1.18577	10.3755	15.1186	17.4901	19.9605	22.0356								3.0561	22.7603	35.4591	43.6645	50.1395	55.7494								0.862069	4.09483	7.75862	8.83621	9.26724	10.1293								3.0561	22.7603	35.4591	43.6645
							1.92077	3.96158	6.60264	10.084	15.1261	20.5282								1.07775	4.00308	8.62202	14.5497	18.5527	23.1717								0.449438	3.07116	5.8427	9.96255	14.4569	19.7753								1.07775	4.00308	8.62202	14.5497
							0.956938	1.67464	5.50239	8.49282	13.9952	17.823								1.14449	3.43348	7.4392	10.7296	13.5908	14.5923								0.846561	2.53968	4.86772	8.14815	10.8995	13.7566								1.14449	3.43348	7.4392	10.7296
							0	0	0	0	0	0								0.542741	2.98507	5.69878	8.48033	11.0583	12.8901								0.366077	2.68456	5.43014	8.54179	11.2264	13.4228								0.542741	2.98507	5.69878	8.48033
							2.94423	8.59023	13.3703	17.0073	20.4711	24.1773								4.15835	9.24817	13.1737	16.4005	19.3945	23.4198								1.47465	3.87097	6.17512	7.89555	9.83103	11.6743								4.15835	9.24817	13.1737	16.4005
							0	0.660884	3.09789	6.85667	10.5741	15.4482								0	0	0	0.26455	0.26455	0.529101								0.0665779	0.466045	1.43142	2.29694	3.72836	4.72703								0	0	0	0.26455
							0.995025	4.97512	9.45274	10.4478	12.6866	13.4328								2.48566	5.83174	8.69981	11.0421	14.914	17.4474								2.6377	5.04267	8.99922	12.8394	16.6796	19.0458								2.48566	5.83174	8.69981	11.0421
							0.829302	3.2481	7.60194	12.9924	16.9316	20.9399								0.538841	2.51459	7.04984	10.5074	14.2793	18.9493								0.362976	1.69389	3.99274	7.56201	10.1633	11.2523								0.538841	2.51459	7.04984	10.5074
							0.263852	0.263852	0.659631	3.43008	6.33245	10.1583								0	0	0	0.844773	2.85111	5.70222								0	0	0.305344	1.0687	3.89313	7.55725								0	0	0	0.844773
							1.00692	7.36312	14.0969	17.3694	21.3971	23.2851								0.543663	2.31057	3.83962	5.47061	6.89772	8.18892								1.07771	6.0692	12.2802	16.2507	18.945	21.7811								0.543663	2.31057	3.83962	5.47061
							1.48936	9.87234	21.0213	32.6809	42.9362	51.9574								2.08096	11.6876	24.1353	35.3288	46.4082	55.9008								1.27389	8.86744	19.2675	29.996	40.3563	50.2687								2.08096	11.6876	24.1353	35.3288
							0.443459	0.665188	1.33038	3.7694	5.43237	6.76275								0.405268	0.607903	1.51976	1.72239	2.9382	4.86322								0.412088	1.23626	1.78571	3.02198	3.70879	4.53297								0.405268	0.607903	1.51976	1.72239
							0	0	0	0.321543	0.96463	0.96463								0	0.156986	0.313972	0.784929	1.56986	2.1978								0	0	0	0	0.569801	1.4245								0	0.156986	0.313972	0.784929
							0.408998	1.22699	1.63599	3.27198	3.68098	4.08998								0.623441	1.37157	3.49127	4.48878	5.48628	6.73317								0.264201	0.528402	1.5852	2.77411	4.62351	6.47292								0.623441	1.37157	3.49127	4.48878
							0.158353	0.158353	0.475059	1.10847	1.42518	2.45447								0.395648	0.593472	0.791296	1.18694	1.18694	1.58259								0.310881	0.518135	0.777202	1.34715	2.22798	4.09326								0.395648	0.593472	0.791296	1.18694
							0	27.2727	36.3636	39.3939	39.3939	39.3939								0	0.395159	5.08768	9.87898	14.3739	18.3502								0	2.46679	6.26186	7.96964	10.4364	11.9545								0	0.395159	5.08768	9.87898
							0.337268	3.03541	5.73356	8.60034	10.4553	10.9612								0.123635	5.11024	11.9926	19.184	24.6652	29.5487								0.322754	4.14201	8.06885	10.5433	11.7267	12.8026								0.123635	5.11024	11.9926	19.184
							0	6.03448	15.5172	18.9655	25.431	29.3103								0	0.460594	4.17093	10.1331	15.7369	20.8035								0	0.552868	5.43654	11.8867	17.9452	24.0958								0	0.460594	4.17093	10.1331
[truncated: 14 more columns]
