# Supplementary material for: Suppressed prefrontal neuronal firing variability and impaired social representation in IRSp53-mutant mice
Source: eLife. 2022 Nov 1;11:e74998. doi: 10.7554/eLife.74998 (PMC9662818; doi:10.7554/eLife.74998)
Supplement: Figure 6—figure supplement 2—source data 1. — The excel file contains the numerical data used to generate Figure 6—figure supplement 2A–N. [file elife-74998-fig6-figsupp2-data1.xlsx]

## Sheet: Fig6_S2
	Fig 6_S2A	Fraction of ISI (Linear chamber)					Fig 6_S2B	Sigma		Fig 6_S2C	FR range		Fig 6_S2D	E-E Maximum ΔFR		Fig 6_S2E	First S-O Maximum ΔFR		Fig 6_S2F_Right
		WT		KO			WT	KO		WT	KO		WT	KO		WT	KO		# of neurons	Decoding accuracy (%)
	ISI (ms)	Mean	SEM	Mean	SEM		0.82018	1.14117		8	7.66667		0.204265	0.5964		0.368759	1.23596			WT
	2	0	0	0	0		3.09418	1.09782		20.3333	7.33333		0.681788	0.390013		1.18306	0.344529		1	25	40	65	70	70	40	75	40	55	70	55	60	60	70	60	75	35	80	85	45	35	75	90	55	65	50	35	35	50	30
	4	0	0	0	0		2.87473	2.69109		14.3333	17		1.18881	1.06542		1.19085	1.02401		2	80	45	75	70	55	75	55	80	60	15	70	85	25	35	60	85	90	50	70	85	70	50	60	45	70	80	70	55	40	30
	6	0	0	0	0		4.2936	1.62805		19.6667	7		1.1362	0.408605		0.629213	0.389617		3	80	65	45	50	50	55	50	50	40	45	70	50	40	45	85	40	60	45	45	50	45	55	70	70	55	50	65	30	55	75
	8	0	0	0	0		2.79687	1.83386		15.3333	10		1.0388	0.41621		5.39113	0.546425		4	55	65	75	60	65	55	60	80	85	90	80	55	55	55	75	70	45	70	65	70	40	35	70	85	35	75	65	65	50	55
	10	0	0	0	0		3.15934	1.83846		14	11.3333		0.14021	1.60681		1.62853	0.690573		5	55	55	85	75	30	60	75	75	80	55	70	70	70	50	50	30	50	60	55	90	45	95	95	50	50	65	40	60	55	65
	12	0.0149725	0.000858953	0.0108752	0.000635776		1.3712	1.5417		8.66667	10.3333		0.706676	1.1357		0.456884	0.480647		6	95	75	75	60	80	60	50	80	70	65	45	65	65	70	75	75	50	70	55	60	75	75	55	65	45	85	75	85	70	65
	14	0.0145577	0.000711785	0.0110106	0.000575552		1.24152	1.10646		8	6		0.430875	0.231172		0.583728	0.478037		7	80	70	75	80	55	70	75	70	95	65	60	70	60	60	65	70	65	50	35	65	65	70	50	85	65	50	45	80	70	35
	16	0.014134	0.000650911	0.0118722	0.000594838		2.05914	3.23322		11.6667	19.6667		0.545597	1.46409		1.27708	0.558519		8	65	40	60	55	75	55	75	70	65	65	60	90	60	60	85	55	80	65	65	35	70	70	75	60	60	40	60	90	70	80
	18	0.012825	0.000564249	0.010817	0.000527812		1.15162	1.28449		8.33333	9.5		0.0298753	0.563144		0.391274	0.0546212		9	50	55	40	65	60	70	55	75	60	65	60	80	70	70	55	70	65	80	70	75	75	70	70	45	70	70	65	55	85	60
	20	0.0126406	0.000550812	0.0110398	0.00051841		1.46803	5.04584		7.33333	23.3333		0.212934	1.76565		0.462588	1.13312		10	45	60	85	70	85	95	45	45	60	85	45	75	65	75	95	55	50	70	60	60	75	45	90	85	65	55	90	50	70	55
	22	0.0117143	0.000511795	0.0106027	0.000490254		2.3027	1.35803		9.33333	9.33333		0.851838	0.996299		0.650152	0.24512		11	55	75	65	75	75	35	70	85	80	75	75	65	70	50	50	65	60	40	60	70	60	50	65	65	75	55	55	70	75	65
	24	0.0111832	0.000467909	0.0101906	0.000469017		0.974379	3.05002		5.33333	15.6667		0.888441	1.73989		0.881797	1.62976		12	65	65	60	65	90	70	70	45	60	70	65	45	85	70	65	75	45	65	45	35	65	70	60	35	65	75	40	55	65	60
	26	0.0108919	0.000457589	0.0097992	0.000445628		1.64175	2.86011		8.33333	14.6667		1.08436	2.46676		1.7994	0.497794		13	75	35	70	100	60	45	90	30	90	55	75	55	50	45	50	35	70	35	70	55	90	75	65	80	70	85	70	65	60	80
	28	0.0101215	0.000439926	0.00916946	0.000413966		2.17638	2.74734		11	14.6667		0.358508	1.80079		2.43224	1.32761		14	75	45	95	85	45	55	60	70	65	75	50	95	75	75	65	65	75	70	35	80	55	45	70	60	85	40	80	60	55	60
	30	0.00996001	0.000440708	0.00902547	0.000411012		2.32885	1.11823		13	9		0.75443	0.644368		2.1152	0.38318		15	95	50	65	70	65	70	75	85	70	65	80	75	80	50	50	80	80	55	85	75	70	40	60	70	40	60	80	85	70	80
	32	0.00956626	0.000417536	0.00878377	0.000399812		2.80908	3.23794		18.3333	15		3.8929	2.51572		4.50186	4.40729		16	50	75	90	85	50	60	85	65	65	80	60	95	70	60	55	90	65	75	80	100	65	80	60	60	80	70	65	65	85	100
	34	0.00963261	0.000418584	0.00864197	0.000395043		1.55486	2.87334		10	15.3333		0.776585	2.11312		0.557813	1.92389		17	55	80	60	75	55	30	95	85	60	55	45	55	90	55	55	75	90	70	85	50	50	80	40	60	55	50	75	75	60	50
	36	0.00903801	0.000394937	0.00801551	0.000355449		1.02654	3.59077		6	15.6667		0.55292	0.75821		1.12052	3.60452		18	65	70	75	85	60	50	85	95	50	75	75	80	45	75	75	55	45	60	70	70	80	85	70	65	75	85	65	65	70	60
	38	0.00920128	0.000390315	0.00839627	0.000359771		1.4759	0.886766		11.3333	5.33333		1.8931	0.496636		1.92549	0.928202		19	45	90	70	75	60	70	75	65	55	55	50	65	90	45	70	85	85	65	95	65	75	55	70	40	80	70	55	65	50	80
	40	0.00908555	0.000393963	0.00818585	0.000359972		1.01116	3.99115		7.33333	19		0.823228	1.60409		1.19451	6.83868		20	60	60	75	90	70	45	60	55	80	40	60	80	65	90	75	70	90	75	80	100	55	65	50	70	85	60	65	95	45	55
	42	0.00880808	0.000364986	0.00783155	0.000343483		2.23659	0.849746		15.6667	7.33333		2.99633	0.307047		2.86783	0.713473		21	95	75	50	65	70	90	80	55	40	80	65	60	75	55	80	65	75	55	40	75	45	60	55	75	90	70	65	65	65	50
	44	0.00887257	0.000364698	0.00782064	0.000338216		0.91656	2.32493		6.33333	17.3333		0.676894	0.839645		0.721645	0.928655		22	55	55	60	40	50	75	80	45	75	50	45	80	45	60	80	80	80	75	70	95	55	65	40	80	90	85	45	75	50	95
	46	0.00842065	0.000353026	0.00741777	0.000315041		1.00576	1.38248		7.66667	14.6667		0.730261	0.807629		0.467197	0.290191		23	55	85	55	70	60	50	55	60	50	80	75	65	60	55	85	75	50	40	55	55	60	60	75	60	90	95	60	85	60	85
	48	0.00877226	0.000341347	0.00759523	0.000313594		2.81476	1.90237		15	16		4.20854	0.60408		3.03658	3.15976		24	55	90	40	90	55	70	80	80	50	60	40	45	65	60	80	40	60	60	60	55	50	50	70	90	60	85	50	70	60	80
	50	0.0085119	0.000326564	0.00737448	0.00030304		3.34328	2.13029		18.3333	13		0.580335	0.479174		2.2586	0.758765		25	65	70	95	65	70	75	90	60	65	85	40	70	60	70	70	65	80	80	60	75	70	55	60	90	90	60	45	30	95	75
	52	0.00862073	0.000334859	0.00733752	0.000306715		2.93113	1.82703		13.3333	10.3333		0.924704	1.09561		0.860646	0.998147		26	70	60	75	80	90	75	85	45	40	75	45	75	50	85	60	65	80	85	60	75	75	65	95	65	90	85	50	85	70	65
	54	0.00816408	0.000316747	0.00731512	0.000276279		3.45978	1.30788		20.6667	11		0.220207	2.43348		2.24535	0.544298		27	75	75	65	80	80	75	75	70	45	45	95	95	75	50	60	55	65	50	45	75	65	60	95	75	65	90	65	95	80	70
	56	0.00827453	0.000317825	0.00742329	0.000288349		4.11795	0.925922		26	7.66667		4.42416	0.648615		2.29851	0.310301		28	85	50	70	80	95	85	70	90	70	60	85	85	70	85	100	70	70	75	90	45	80	50	55	70	40	75	60	35	45	40
	58	0.0083444	0.000303419	0.00749523	0.000282711		1.72001	4.44738		9.66667	24.3333		1.51312	4.58204		1.16672	5.47306		29	70	90	60	60	75	65	80	65	70	85	55	85	70	100	85	85	90	90	75	70	90	65	50	60	75	65	65	75	80	65
	60	0.00795972	0.000294216	0.00719338	0.000260861		2.24785	0.858722		13.6667	6.66667		2.57596	0.312562		2.55031	0.35319		30	85	65	80	75	90	60	75	70	85	55	90	55	50	60	85	85	65	80	55	80	75	60	60	95	95	70	95	95	65	100
	62	0.00827408	0.000285363	0.0071138	0.000263484		2.17937	0.688324		12	4.66667		1.62033	0.42123		3.02244	0.392668		31	65	80	75	80	50	100	65	65	65	60	75	65	85	65	100	90	70	75	65	60	50	65	70	85	75	80	60	65	90	80
	64	0.00787712	0.000266394	0.00684419	0.000257562		1.26576	1.53816		7.66667	10		1.06671	0.304835		0.872864	0.679326		32	45	60	55	70	80	80	65	55	55	70	65	65	50	85	85	80	70	80	70	75	75	75	85	85	65	45	75	70	65	60
	66	0.00818592	0.000273048	0.00701886	0.00025695		0.922461	1.24322		5	7.66667		0.568532	0.527567		1.28201	1.11131		33	75	45	60	70	70	95	75	90	65	65	70	75	75	80	70	90	40	45	70	90	70	85	80	65	95	50	70	60	70	80
	68	0.00811593	0.000260915	0.00698583	0.000238126		1.17458	2.39898		8	13.3333		0.170135	2.08648		0.247908	3.16292		34	55	65	80	65	55	75	60	65	70	45	65	65	90	55	85	70	70	95	55	85	50	70	75	70	70	75	70	85	80	50
	70	0.00796714	0.000261543	0.00711435	0.000230321		1.75221	1.34973		10.6667	8		0.717388	1.19347		2.05388	0.90504		35	65	85	80	90	60	85	85	70	80	50	55	90	45	55	70	70	75	70	60	75	70	70	75	90	55	70	85	80	60	70
	72	0.00776946	0.000250678	0.00667838	0.000231077		1.39857	2.55135		9	14.3333		0.425022	2.25229		0.365338	2.0212		36	80	85	45	85	90	45	55	65	80	65	85	100	75	85	50	60	70	85	75	55	80	65	55	70	95	85	80	70	90	65
	74	0.00785366	0.000237939	0.00685982	0.000231845		1.21582	1.52576		8	8.66667		0.264024	0.250773		0.632298	0.866064		37	85	60	50	60	70	75	75	50	60	70	90	45	80	85	55	85	75	85	95	55	90	80	85	90	95	80	55	65	65	60
	76	0.00761438	0.000241027	0.0067759	0.000219429		1.05041	0.711938		7	6.33333		0.390546	0.254529		1.07815	0.104167		38	45	65	90	35	90	60	85	90	60	85	95	80	55	65	60	75	55	45	75	70	75	85	75	70	85	60	50	75	75	75
	78	0.00783605	0.000227918	0.00681335	0.00021829		1.8027	0.821013		9.33333	5		0.953003	0.219076		0.376563	0.220789		39	65	60	90	55	90	100	55	80	80	70	60	85	65	60	40	90	60	75	70	75	50	70	70	80	65	55	60	90	60	50
	80	0.00764614	0.000214968	0.00668688	0.000219316		2.15382	2.11849		14.3333	12.3333		0.379817	0.601955		0.972889	1.27231		40	60	90	65	55	100	70	55	80	85	85	85	80	90	80	50	95	65	85	70	90	85	55	95	90	90	55	90	85	55	70
	82	0.00733877	0.000203266	0.006641	0.000203454		4.15456	5.23091		21.3333	24.3333		1.84482	1.05413		1.76498	2.00478		41	80	70	55	80	85	60	90	95	95	95	65	70	70	95	55	65	70	80	50	85	75	75	70	50	55	90	80	85	65	65
	84	0.00752251	0.000210422	0.0066891	0.000215255		1.7409	1.76075		10	12		0.686825	0.562155		0.675345	1.64181		42	75	60	65	80	95	50	65	95	90	85	85	60	80	95	65	55	70	95	80	70	75	60	80	65	70	85	60	60	95	85
	86	0.00748117	0.000199973	0.00662447	0.000197529		0.896481	2.63134		5.33333	13.6667		0.56863	0.303122		0.581103	4.37234		43	60	75	60	90	95	70	35	95	70	75	85	80	70	80	95	50	75	75	75	45	55	80	65	80	80	65	90	100	65	80
	88	0.0074496	0.000196056	0.00675819	0.00019359		3.22363	2.40801		18.3333	11.3333		1.09631	1.51943		2.37293	1.7547		44	80	60	80	80	85	55	35	70	90	90	90	50	90	75	70	80	75	80	90	80	90	90	65	60	65	60	90	60	80	70
	90	0.0071637	0.000186988	0.00624835	0.000186539		4.41447	3.40848		23.3333	19.3333		1.97803	3.73947		4.93447	4.33485		45	75	75	75	85	90	80	75	55	80	60	65	90	95	85	45	60	100	75	80	80	75	90	60	95	85	70	65	75	70	70
	92	0.00719904	0.00018238	0.00661209	0.000193527		2.39518	0.810402		15.6667	6.33333		1.10462	0.846629		0.203223	1.18519		46	95	95	80	65	35	55	95	80	70	80	50	55	85	70	75	75	75	85	70	70	65	95	90	80	90	90	65	80	55	75
	94	0.00719718	0.000176803	0.00656224	0.000178479		4.49728	1.45511		21.6667	7.33333		0.289501	1.6621		2.01315	1.1529		47	80	100	75	60	70	75	80	100	85	65	60	60	85	50	85	65	55	60	80	75	80	90	90	75	65	55	95	70	85	70
	96	0.00726928	0.000182642	0.00651031	0.000183604		5.42136	2.69804		24.3333	13.3333		1.19511	0.419678		1.49413	1.93408		48	90	75	80	55	80	85	85	85	65	75	70	85	60	80	65	65	70	65	85	90	60	100	70	95	90	50	85	60	90	90
	98	0.00706084	0.000180622	0.0064576	0.000177731		5.21618	1.44775		26	13.6667		0.648605	0.238705		1.92717	0.550265		49	80	60	80	85	45	85	75	100	75	75	60	95	60	50	45	95	85	80	95	65	80	80	65	55	90	85	65	75	95	80
	100	0.00660353	0.000151425	0.00631456	0.000171416		3.72138	2.99229		20.6667	18.6667		4.15378	1.9491		1.84203	3.74394		50	90	95	60	70	75	55	80	80	80	95	70	90	50	70	65	85	75	60	80	60	45	70	95	85	75	85	70	80	70	85
							1.06746	1.61439		7.66667	13.3333		0.292838	0.191513		0.341928	0.26784		51	80	90	45	80	75	65	90	65	65	50	45	75	60	95	60	55	90	50	75	100	75	95	90	90	75	80	75	60	80	85
							1.13489	4.61477		8	24		0.417702	2.89223		0.100975	1.69965		52	85	75	60	80	95	90	85	80	90	60	65	85	95	75	80	70	85	50	95	65	75	55	75	95	85	75	70	75	50	80
							1.15466	1.45714		8.66667	13		0.0264868	0.212565		1.50535	0.0651811		53	70	65	55	70	80	70	85	95	45	95	80	80	65	75	75	65	100	80	85	70	70	80	85	55	90	100	70	80	60	90
							2.035	3.22563		14.6667	13		1.95547	0.246451		1.77371	0.596797		54	75	95	85	85	85	45	95	70	85	80	70	75	60	70	95	65	85	65	60	75	90	90	85	90	90	75	45	60	75	80
							2.09724	0.894584		11	5.5		1.88053	0.339133		1.11606	0.872707		55	70	100	80	80	85	80	95	65	100	50	90	85	75	80	80	60	70	65	60	70	65	55	65	100	65	70	75	80	90	70
							0.761938	1.22387		6	6		0.223778	0.359885		0.651437	0.478145		56	80	80	95	90	85	75	70	80	75	85	85	80	70	85	90	90	80	80	85	75	80	75	85	85	75	70	45	75	100	70
							3.55912	1.93735		17.3333	10.3333		2.17406	0.900664		3.54869	0.971689		57	95	55	85	65	90	75	50	80	75	75	95	70	80	85	35	65	65	65	70	75	80	80	75	60	70	90	95	75	70	90
							2.78018	0.741863		16.6667	6.33333		2.50317	0.507407		1.00575	0.188361		58	70	75	85	60	75	85	80	75	75	60	95	85	90	90	90	75	90	95	75	60	60	100	50	65	100	95	80	85	85	75
							3.13075	1.16398		17.3333	7.66667		4.44616	0.477099		0.852084	0.548291		59	60	95	95	80	65	75	95	75	100	55	100	85	70	100	45	65	70	75	70	75	60	85	85	80	80	80	75	75	65	80
							3.19744	2.77881		17	17.3333		1.16842	2.29041		2.46593	3.20705		60	80	60	90	95	85	90	85	55	85	80	65	75	65	85	100	60	100	90	65	80	100	75	85	100	85	65	85	70	80	90
							1.59406	1.75505		9.33333	8.33333		0.305049	0.474349		0.635435	1.38297		61	80	70	70	90	80	95	70	95	75	65	65	60	85	80	65	100	80	70	100	80	60	95	55	80	95	85	90	95	85	80
							4.15933	2.33421		18.6667	14		2.10308	0.965173		2.58661	3.25524		62	85	85	75	95	60	70	65	70	100	90	95	70	80	75	50	100	75	100	95	80	75	70	85	65	75	100	80	70	95	80
							4.87515	1.015		23.6667	6.66667		1.13154	0.460867		5.63638	0.492985		63	90	80	55	95	65	75	95	85	90	85	90	85	60	60	75	70	65	90	80	70	70	90	65	75	55	65	90	70	80	90
							2.02362	2.20128		11	12.6667		0.946121	0.72587		1.20479	0.76285		64	95	65	85	85	60	75	95	75	80	80	70	85	60	85	90	70	70	70	70	75	75	90	75	80	70	90	90	75	65	75
							0.968174	0.72772		8.66667	4.33333		0.761643	0.0887105		0.106704	0.495023		65	55	85	75	75	90	55	85	65	80	60	70	80	70	85	75	90	75	50	85	100	90	45	55	85	70	95	60	70	60	85
							1.57225	2.68604		8.66667	13.6667		0.755989	0.723744		1.87239	0.634967		66	85	70	60	100	70	80	80	70	95	85	70	75	90	70	80	65	95	75	80	80	85	55	55	60	90	70	90	65	80	95
							1.25458	0.944887		9.33333	5.33333		0.462948	1.02894		1.15203	0.423315		67	60	90	95	55	75	60	70	100	80	60	85	80	95	65	80	55	65	85	55	85	90	85	70	95	95	70	90	75	85	85
							3.29275	1.25549		17	9		0.316396	0.563693		0.178073	2.02972		68	90	80	80	80	75	85	80	85	85	65	75	75	80	85	45	65	65	100	90	90	60	80	70	70	100	95	60	70	80	95
							5.87485	0.955087		30.6667	4.66667		1.37357	0.386245		1.74205	0.481672		69	90	55	95	80	90	65	90	40	85	80	65	90	65	100	90	100	85	70	95	80	80	80	70	90	85	75	80	80	100	95
							1.86019	0.822926		11.6667	4.33333		2.53953	0.208902		1.52889	1.14929		70	70	70	70	75	85	100	100	75	95	85	70	80	75	90	100	75	90	60	90	65	70	80	100	95	75	85	85	85	70	70
							3.41655	0.651548		18	10		1.03835	0.503333		2.13021	0.40554		71	80	80	70	100	80	75	95	80	55	80	85	90	95	85	90	80	95	75	80	80	100	70	70	90	60	75	95	80	65	65
							1.49186	0.993524		8	7		0.234144	0.411158		0.557601	0.399406		72	60	95	75	50	75	75	95	80	70	65	80	80	95	65	90	70	75	100	75	95	80	100	95	95	65	80	95	95	95	55
							2.17577	1.91236		14.3333	12.3333		0.484152	1.00767		2.52073	1.99626		73	60	65	80	85	85	95	95	100	90	75	90	85	75	65	60	80	95	75	85	75	75	85	90	85	65	85	75	90	80	70
							1.29651	0.994913		10.3333	5.33333		0.458177	0.95325		0.555497	0.719203		74	95	85	75	45	75	70	90	90	95	70	75	75	90	80	95	70	100	80	90	70	90	90	85	100	95	85	90	90	55	90
							0.811482	0.986266		4.66667	5		0.284065	0.997839		0.696577	0.592433		75	90	65	85	65	85	90	95	80	75	65	85	55	80	85	85	85	80	80	85	70	85	95	60	85	60	50	80	80	80	70
							1.33625	0.917808		7	5.33333		0.976823	0.33715		1.7388	0.715744		76	90	85	85	70	80	65	85	85	65	85	75	80	75	90	95	90	70	85	75	80	60	60	95	70	60	80	90	80	75	80
							3.46736	1.62449		20.3333	8.66667		3.15793	0.907463		3.24729	1.00384		77	65	65	75	70	90	70	80	90	75	75	60	60	90	70	70	85	85	75	95	65	80	70	75	100	80	55	80	80	85	55
							3.73662	0.771775		22.3333	4.33333		3.60342	0.2221		1.71457	0.471118		78	60	60	75	85	100	90	50	50	75	60	50	60	85	100	80	80	90	95	80	80	100	95	80	95	90	80	85	60	70	75
							2.88414	2.04916		14.6667	12		1.20103	2.05366		1.28328	2.81529		79	80	80	95	80	90	95	90	85	90	70	75	90	90	75	75	90	75	80	85	100	85	85	80	90	65	90	75	75	100	85
							1.51892	1.16472		8.66667	6		1.12649	0.299992		1.40365	0.205271		80	85	90	75	65	95	95	90	75	65	85	80	100	90	90	90	75	90	80	65	80	60	90	85	55	75	85	65	80	95	75
							1.49275	1.43027		8.33333	7		0.47014	0.378488		1.35941	0.983652		81	70	80	65	70	80	70	90	90	85	95	85	95	75	100	85	85	70	65	65	65	95	75	75	95	65	75	80	90	85	80
							1.00508	1.84867		6.66667	10		0.577845	0.963173		0.179109	0.435782		82	85	65	95	95	90	65	95	90	75	80	95	70	95	65	65	75	95	90	75	90	75	80	80	100	65	80	65	90	95	80
							1.02733	2.08403		7.5	12		0.201155	0.935567		0.573143	1.53203		83	95	90	90	75	70	45	85	85	60	95	90	90	70	75	90	60	80	75	75	70	85	95	70	85	50	95	95	85	95	80
							0.787301	3.46863		5.66667	22.6667		0.527567	2.41233		0.603526	1.03218		84	80	95	80	85	90	75	75	80	85	85	85	80	90	70	85	85	95	95	75	90	75	85	80	85	90	55	80	85	80	100
							1.08692	0.997145		8.33333	5.66667		0.355744	0.614568		0.729992	1.53298		85	95	90	95	90	90	95	85	75	90	80	90	80	60	90	80	70	50	75	65	60	75	85	95	95	85	95	60	75	75	75
							1.15503	2.01692		6.33333	12.6667		0.517488	0.373563		0.411327	3.16326		86	75	80	75	75	85	80	80	95	90	65	70	80	85	65	90	85	70	85	85	65	90	85	65	75	85	85	75	95	60	95
							0.811582	0.779657		6	5		0.16283	0.19924		0.243116	0.247977		87	75	65	90	75	85	95	85	60	80	75	90	80	95	70	95	85	95	50	85	90	85	100	85	75	75	70	85	85	95	70
							1.4416	1.3866		8.66667	9.5		0.406455	0.59876		0.0737654	1.51161		88	90	70	90	90	85	75	100	90	100	95	85	90	85	55	60	80	70	80	80	95	85	80	65	85	95	80	85	80	75	95
							0.967227	2.12684		6.33333	12.3333		0.902689	0.282591		0.0829012	0.486367		89	95	70	90	85	80	65	65	80	90	90	100	90	80	100	95	75	80	90	60	85	80	75	95	70	90	85	90	90	80	100
							3.88995	1.2076		19	5.33333		4.02817	0.181407		2.7397	0.129805		90	80	100	95	85	90	95	85	65	85	80	75	100	95	80	70	90	70	90	80	70	90	70	85	80	95	85	85	65	90	95
							0.771223	2.10781		4.33333	11		0.207599	1.74429		0.511656	0.816827		91	65	85	75	95	70	85	60	85	100	60	90	90	75	85	80	90	90	95	90	75	65	100	100	100	85	85	75	80	80	95
							1.70595	2.6573		11	22		0.91538	2.4739		0.370195	0.915136		92	95	90	95	85	95	75	100	65	90	100	80	100	80	85	90	60	65	85	90	80	90	75	75	95	95	95	75	70	75	95
							2.25851	3.1503		13	23.6667		1.39229	3.87094		1.53919	2.46286		93	85	80	100	70	75	95	70	90	85	80	85	65	95	85	75	80	80	100	65	65	85	85	80	55	85	80	95	85	95	95
							0.656843	1.34782		4.33333	7.33333		0.158289	0.135842		0.15074	0.472281		94	95	75	85	90	100	80	90	70	95	80	85	80	75	95	65	85	90	95	70	75	80	85	80	80	90	90	75	85	95	85
							1.70015	0.708747		9.66667	4		0.582304	0.114934		0.436991	0.119572		95	85	95	75	90	90	90	90	90	90	85	90	85	80	90	85	95	85	90	70	80	70	60	95	85	95	85	85	90	85	90
							0.790867	3.48118		7	19.3333		0.368997	1.7501		0.698637	4.15215		96	80	70	80	80	65	75	90	85	100	90	85	80	90	75	90	100	90	95	65	90	85	65	100	100	95	85	95	95	85	70
							1.1076	2.93762		5.66667	19		0.399551	0.777556		0.692971	2.98894		97	75	90	85	90	90	65	75	95	95	90	80	85	70	95	90	75	90	95	95	65	90	85	95	95	75	85	70	90	70	75
							3.40924	3.17732		17	21		4.15301	2.74684		3.00002	1.0105		98	75	85	65	95	90	70	80	60	65	80	100	80	85	80	90	80	85	50	100	95	85	80	95	80	70	90	95	95	95	80
							3.86467	1.1592		21.3333	8.66667		4.10921	0.70237		2.36582	0.497501		99	90	85	65	70	95	95	85	95	85	70	90	90	85	85	85	85	85	65	85	90	100	90	95	65	65	65	85	85	75	100
							1.65993	0.688574		9.33333	3.66667		1.50661	0.132346		0.836637	0.424331		100	100	90	95	75	85	70	90	80	90	75	75	65	95	85	95	85	75	100	80	85	95	80	70	80	95	90	60	100	85	85
							2.42526	1.39511		13.6667	7.33333		0.36437	0.229197		2.14259	0.329533		101	85	50	80	95	90	100	85	75	85	100	90	90	75	90	75	95	95	80	65	60	80	50	90	65	85	80	80	80	75	80
							1.30706	2.83815		10.3333	19.6667		0.872085	1.41621		0.80698	3.04073		102	85	75	90	90	95	75	85	85	85	100	90	70	90	90	70	85	80	85	80	90	90	85	85	65	95	80	90	95	95	75
							2.90808	1.1982		14.6667	14.6667		3.18908	0.367193		3.46531	0.400011		103	70	100	75	80	95	90	85	85	95	95	85	80	85	85	85	95	100	85	90	60	100	90	80	100	100	80	85	90	100	95
							2.20812	1.86353		11.6667	9.66667		1.20417	1.29092		2.43009	2.52657		104	60	95	90	95	100	85	75	70	80	100	75	95	95	80	65	70	90	100	90	70	95	100	90	85	85	80	100	95	100	90
							1.65555	3.60859		8.66667	23.3333		1.20274	2.327		1.59739	1.23597		105	65	90	95	75	70	95	80	80	90	65	75	80	90	80	65	100	75	95	90	95	85	85	100	80	75	85	65	100	85	70
							1.84503	2.42134		14.3333	17.3333		0.176027	0.451073		0.284281	1.05541		106	90	85	80	80	85	75	70	85	90	70	100	70	65	75	90	80	70	85	90	90	80	90	85	90	85	85	75	90	85	95
							1.08045	0.804852		7	6		0.13488	0.25779		0.556088	0.64634		107	90	90	60	85	95	75	100	100	80	85	75	80	95	85	95	95	100	75	100	85	75	100	80	80	90	90	90	90	85	90
							1.43681	1.1684		10	6.33333		0.340387	0.626943		2.00737	0.393571		108	95	85	85	65	85	80	90	85	85	75	95	60	90	85	75	70	95	80	75	100	95	100	80	85	95	75	95	85	100	100
							1.08278	2.38719		7	14.6667		1.69107	0.268011		0.549716	0.765207		109	85	70	75	90	85	90	90	65	80	90	90	75	90	90	75	90	75	85	90	85	95	65	90	55	95	95	95	95	70	80
							0.922333	2.32985		5.66667	14		0.207363	2.67125		0.383839	3.85897		110	90	80	85	95	95	80	100	90	95	85	95	70	90	85	80	95	90	80	95	85	95	85	85	75	85	90	90	85	95	95
							3.76516	2.89261		20.6667	13		3.66984	2.10921		4.1908	3.45272		111	75	65	70	100	95	95	65	95	85	85	80	80	85	90	70	85	95	90	95	95	100	80	95	70	95	90	80	85	85	85
							1.03751	1.01287		8	6.33333		0.38206	0.377569		0.391834	0.659078		112	70	90	80	90	95	90	80	70	95	90	100	90	85	75	85	80	75	70	80	90	95	85	70	95	90	80	95	90	70	80
							2.1305	0.770337		13.3333	4		1.13605	0.589296		1.50267	0.438568		113	90	80	90	90	70	90	80	75	100	85	90	90	80	95	90	95	80	75	75	100	85	90	85	90	95	85	80	90	85	85
							1.41916	3.21574		8	18		0.755417	0.43676		2.08648	1.07565		114	90	95	95	75	95	70	80	85	75	85	75	100	90	90	80	90	95	100	70	85	80	85	65	100	60	90	85	80	90	85
							1.45559	1.52855		8	10.6667		1.30214	0.078705		1.00911	2.12876		115	100	75	90	85	90	85	100	100	80	75	90	65	95	70	95	95	75	80	75	95	95	90	95	70	100	80	95	85	95	80
							1.03613	1.16082		7	6.33333		0.787169	0.281468		1.40094	0.919569		116	95	60	85	85	100	95	90	95	100	70	100	80	75	90	100	75	75	90	95	85	80	95	70	90	80	85	75	85	80	90
							3.58148	0.762369		20	4		1.07004	0.42436		2.81685	0.458275		117	85	90	80	90	95	95	85	80	100	90	95	90	90	95	75	90	90	75	85	55	90	100	100	80	90	80	70	95	95	90
							0.778376	0.811028		4	4		0.110828	0.537937		0.706649	0.793382		118	85	90	80	90	80	85	75	95	100	90	85	100	95	70	100	95	100	85	100	95	95	80	95	65	95	100	95	70	75	85
							0.714551	2.49739		5.33333	16.6667		0.210294	1.98538		0.334509	2.44244		119	95	80	90	95	65	95	70	80	70	75	90	90	90	100	100	70	85	80	95	95	90	75	95	85	90	85	100	85	85	65
							1.02965	1.69649		6	8.66667		0.270193	2.51074		0.645496	2.46102		120	95	85	75	85	90	95	85	90	90	90	100	95	80	85	95	70	80	80	85	95	80	70	80	100	95	90	75	95	100	70
							0.777869	0.658972		4	4		0.546731	0.280908		0.775847	0.637546		121	85	95	90	85	90	90	85	85	95	80	80	95	85	90	90	100	60	70	75	95	100	70	90	90	85	75	75	90	85	80
							3.47251	2.7373		21.3333	18.3333		1.45497	0.599396		2.36763	1.57834		122	90	95	95	95	90	65	95	90	75	85	75	75	85	85	90	95	95	85	85	95	75	80	70	90	95	90	85	90	60	85
							2.61042	1.02223		18.5	6.33333		1.58834	0.53869		0.832787	1.09736		123	85	60	70	95	95	90	95	80	75	90	70	65	85	90	80	95	65	95	90	90	85	95	75	90	85	95	80	95	80	85
							2.16561	1.18597		12.6667	6.66667		1.17621	0.381904		0.987397	0.91917		124	80	80	95	100	70	80	85	95	100	90	95	80	85	95	70	90	65	95	85	90	95	90	95	65	90	95	100	90	80	85
							2.40371	0.815883		15.6667	6		1.93105	0.123562		2.18218	1.54739		125	100	95	75	100	90	90	95	90	95	75	80	95	90	85	85	90	100	90	85	70	80	75	90	75	80	75	95	65	95	75
							1.07532	1.9501		6	10.3333		0.361602	1.23968		0.543563	0.187121		126	90	70	90	90	75	95	80	90	85	90	95	75	85	90	90	80	85	90	85	85	90	95	85	85	100	90	100	80	90	90
							2.7017	0.842567		15.6667	4.66667		3.04124	0.738548		3.04707	0.350478		127	85	85	95	90	85	85	85	80	80	80	100	90	85	100	90	85	100	90	95	85	75	65	75	95	95	100	90	70	95	95
							1.33194	2.33915		7	13		0.16888	0.162802		0.693505	2.63162		128	95	80	70	70	65	80	75	50	80	80	95	90	70	90	90	100	85	75	90	100	90	100	90	100	85	90	85	90	95	95
							1.62237	2.12459		9.66667	15.6667		0.284796	0.93759		1.63063	1.93763		129	95	80	75	75	90	95	85	75	75	95	80	75	95	80	90	100	75	95	75	95	85	100	100	100	70	85	100	90	90	90
							3.8575	5.18697		19.6667	19.6667		0.550598	0.560867		1.91441	4.29738		130	95	75	100	80	80	95	100	80	90	95	95	80	85	85	85	70	90	90	95	90	90	95	100	85	90	100	90	60	85	80
							1.69274	0.926883		9	6.33333		1.09714	0.527842		1.42859	1.18209		131	90	75	65	95	90	95	95	65	90	95	65	95	95	90	85	75	100	90	95	100	90	95	80	85	80	95	80	85	75	80
							0.962707	2.43016		6.33333	13		0.232197	1.32295		0.988017	5.24534		132	85	95	95	85	80	90	85	90	80	80	95	80	80	85	85	70	85	80	100	80	90	95	95	90	100	70	80	95	80	80
							2.14638	3.30081		10.3333	15		0.184552	1.5048		2.01205	2.16514		133	95	50	90	90	95	90	80	80	90	95	90	85	100	75	100	70	80	95	100	80	100	90	75	95	90	100	85	90	85	80
							2.86262	1.51146		17	10.3333		1.68034	0.541889		2.30784	1.43798		134	95	85	100	75	70	80	50	100	95	90	95	90	90	90	85	70	85	80	80	95	85	95	95	95	90	100	90	90	70	95
							1.89748	0.891206		10	6.33333		0.873497	0.147863		0.791668	0.697101		135	80	85	90	90	65	80	85	90	85	80	100	95	95	100	90	100	75	95	85	85	95	100	75	85	100	95	90	95	100	90
							1.9359	1.45874		9.5	9.66667		0.143538	0.114465		1.0048	1.46437		136	100	90	70	95	75	90	95	85	90	85	80	80	85	80	95	100	95	85	100	80	80	100	80	90	85	75	95	100	85	85
							0.553349	1.22423		3.66667	8.66667		0.397404	0.313775		0.216	0.121879		137	85	95	75	70	95	90	95	75	75	60	80	95	95	85	95	90	80	90	95	80	95	95	85	90	95	90	90	95	80	70
							1.02571	1.38368		7	7.66667		0.133879	0.382222		1.89508	1.57824		138	80	100	95	85	85	80	80	85	100	70	90	90	95	90	80	90	95	85	80	80	85	90	95	95	90	85	85	90	95	85
							1.52863	1.82618		9.33333	10.3333		1.50948	0.38126		3.53232	0.891122		139	70	95	85	95	90	95	100	90	80	80	95	90	95	90	90	80	90	85	80	85	90	75	100	85	80	70	70	70	90	90
							2.30659	2.3885		12.6667	13.6667		0.59767	1.74216		0.709583	1.07073		140	70	85	80	90	90	75	95	95	95	75	100	75	80	90	95	85	100	95	95	90	90	85	90	75	95	90	85	75	100	95
							2.82488	4.48536		16.3333	25.6667		0.486515	0.829902		4.10636	1.12476		141	75	80	75	95	95	95	100	100	90	95	95	90	100	100	80	80	90	85	100	70	85	90	80	85	95	100	90	85	85	75
							4.69626	2.62669		24.6667	14.6667		3.56892	0.385087		8.98242	2.86883		142	95	75	85	85	95	85	95	85	80	100	100	100	100	95	95	80	95	90	95	90	100	100	85	80	90	90	90	100	95	95
							2.4098	1.33959		16.6667	12		0.449144	0.135638		0.274469	0.708321		143	95	95	80	85	95	85	90	80	90	100	85	100	70	100	95	75	90	75	85	85	95	90	100	90	100	95	85	90	95	85
							1.29939	0.970545		11.3333	6		0.100931	0.684375		1.12697	0.621253		144	95	85	85	85	95	85	90	95	90	90	95	100	100	95	80	95	95	90	75	90	90	90	80	100	100	100	85	95	70	95
							1.87511	1.24249		12	7.33333		2.07016	0.814826		0.64876	0.739153		145	75	100	85	100	95	95	90	95	95	85	100	70	95	90	90	100	95	100	90	95	80	90	95	80	95	90	90	85	90	90
							2.0054	1.59933		9.66667	11		1.91505	0.814077		1.32095	3.59668		146	80	90	100	100	85	90	70	95	80	70	95	90	95	90	95	100	90	95	85	90	75	95	80	90	100	95	85	90	90	95
							1.31976	1.18241		8	8		1.08206	0.345832		0.477775	1.26808		147	90	100	85	90	75	80	90	80	100	95	80	80	75	85	95	95	90	85	90	85	85	100	90	90	90	60	80	95	75	95
							3.36999	1.15762		19	6.33333		2.97759	0.148685		1.16759	0.984331		148	75	75	100	100	95	90	95	95	90	65	80	95	100	90	95	95	85	90	95	70	80	95	85	95	80	85	90	55	85	95
							7.41182	3.7062		32.3333	23		1.0953	3.37955		6.22847	3.60402		149	100	95	95	95	95	95	90	95	85	100	90	95	80	90	95	95	80	100	85	95	90	85	75	95	80	75	95	85	95	95
							2.52856	1.28575		13.6667	8.33333		1.91083	0.434939		1.28372	0.89572		150	95	90	95	95	95	100	100	85	100	90	100	80	100	80	90	95	100	85	95	70	90	85	95	100	90	80	90	80	95	100
							0.915545	1.6282		6.33333	10.3333		0.365021	1.91924		0.810037	1.13395		151	95	90	85	100	95	90	95	85	95	90	95	90	90	90	95	90	95	90	100	95	100	85	100	75	85	90	85	90	80	85
							2.94919	3.04892		20.3333	16.6667		4.89465	0.827849		0.634226	0.602757		152	95	85	80	80	95	90	95	95	100	100	95	90	95	90	75	100	80	80	95	80	90	95	90	80	90	95	90	100	85	85
							5.62937	1.78964		29.3333	9.66667		4.78398	0.885502		7.07775	1.8608		153	100	90	90	90	95	95	95	85	85	85	95	80	85	80	100	95	90	80	90	100	90	70	90	80	75	75	85	70	100	90
							3.11678	3.44334		19.3333	21		1.44867	3.7376		2.48164	0.174708		154	95	85	100	75	95	65	90	100	85	95	90	90	90	95	90	95	90	95	80	100	95	90	95	95	80	100	100	95	85	95
							1.63324	1.88797		11.3333	11.6667		0.523559	2.25019		0.222827	0.689982		155	90	85	85	90	90	100	100	80	90	90	75	80	80	95	85	90	80	85	90	80	90	100	90	85	90	95	80	70	75	100
							4.19391	2.40219		20.3333	14.3333		3.22566	2.3234		2.67447	2.88764		156	95	85	100	85	95	90	75	80	85	95	100	80	95	85	85	95	75	90	80	90	100	90	95	90	85	100	95	60	95	70
							3.90195	1.75667		23.3333	10.3333		1.72929	0.489586		3.26815	2.03164		157	80	90	75	100	85	75	90	95	85	90	100	95	85	100	95	85	80	85	95	85	90	90	85	90	85	90	85	90	90	80
							1.03146	1.82975		7.66667	9.33333		0.414258	0.58002		0.493228	1.14466		158	95	90	85	75	90	75	90	85	80	90	100	95	100	100	100	85	90	75	100	95	95	90	75	90	90	95	100	95	95	90
							0.943711	1.29553		7.33333	8		0.0689883	1.26745		0.393012	1.01008		159	95	90	90	90	100	95	90	100	100	85	100	90	85	90	100	95	80	90	95	85	95	90	90	90	85	95	85	100	70	100
							5.32995	1.38146		26	5.66667		2.93752	0.844522		5.78726	0.125626		160	80	95	80	90	85	95	100	85	100	95	100	85	90	100	75	100	80	85	95	85	90	75	90	100	100	95	100	95	95	95
							6.2842	3.45772		35.6667	28.6667		4.87891	3.81337		12.9501	1.25834		161	95	95	95	95	85	95	90	90	95	80	95	80	95	75	95	80	80	100	95	95	100	75	90	95	100	75	95	80	90	85
							2.71054	0.887601		16.6667	6		2.76577	0.570078		2.37082	0.398367		162	100	100	90	95	80	80	85	95	95	85	80	60	100	90	100	95	75	75	100	85	90	90	70	95	100	100	95	90	95	95
							3.8125	2.33239		17	17		3.35022	0.722127		2.58944	1.42935		163	85	95	90	85	100	95	100	95	90	85	95	95	95	75	100	95	90	90	100	100	80	70	90	90	95	95	95	100	95	80
							4.89108	0.690765		29.6667	3.66667		2.20523	0.67714		6.1957	0.164095		164	95	75	85	80	85	70	100	100	85	90	100	90	95	90	100	80	90	95	90	85	95	75	85	95	95	85	90	90	95	80
							1.98629	0.765425		17.3333	4.66667		0.186378	0.333002		0.869901	0.0845226		165	85	90	100	100	90	95	95	90	95	85	85	95	90	85	90	100	85	95	95	95	85	85	90	95	85	95	95	100	80	85
							2.04832	1.11694		15.3333	7		0.264965	1.10135		3.29439	0.500601		166	85	90	95	75	95	85	90	95	95	80	95	75	80	95	90	100	95	95	90	85	90	100	100	95	75	85	90	85	75	95
							1.6228	2.79013		14.3333	19		0.257458	0.627213		0.9249	0.62157		167	90	90	85	95	90	100	90	85	95	95	100	90	95	100	70	85	90	95	75	90	90	95	100	95	85	95	90	100	95	85
							6.08076	1.02321		27.6667	7		0.362109	0.375921		5.52525	0.141687		168	95	95	100	100	100	100	85	95	100	95	90	80	100	90	90	85	100	100	95	95	95	95	90	100	95	85	90	95	95	90
							2.9246	1.40795		17	10.3333		0.958015	0.406371		0.609242	1.16973		169	95	100	80	95	100	90	85	95	90	75	80	75	75	100	85	100	95	75	100	90	90	80	90	95	95	95	80	90	90	95
							1.90851	0.702733		13.6667	5.66667		0.069776	0.334645		0.447481	0.376931		170	95	95	85	100	95	95	90	90	100	95	85	80	85	95	85	95	100	90	100	85	85	75	65	95	85	70	95	90	95	85
							0.770902	2.35202		5.33333	15		0.0563668	0.891912		0.671293	2.82169
							0.868955	1.1194		6	6.33333		0.190557	0.423316		0.61353	1.09075
							1.25952	0.685689		8.66667	4.33333		0.596587	0.186599		0.927749	0.50888
							1.58179	1.35937		9.66667	8.66667		0.94549	0.508099		0.73878	0.651988
							2.13683	1.05653		16.3333	6.33333		0.681104	0.355979		1.63457	0.387923
							1.62546	1.41178		10	7		0.097157	0.119401		0.920057	0.62966
							1.45549	0.703214		9.33333	4		1.15959	0.281392		0.680753	0.0244153
							1.35074	1.77555		11	10.3333		0.0977357	1.51191		0.830264	0.953222
							0.943403	0.859879		7	5.66667		0.413471	0.38041		0.386369	0.0855777
							1.9243	2.13837		11	10		1.87606	2.14445		2.62163	1.06861
							4.32327	2.98514		26.3333	18.6667		3.71661	1.18383		5.72051	0.406253
							1.84158	5.44189		11.6667	21.6667		0.491355	1.97041		1.23974	0.996209
							2.13092	0.698219		16	4.33333		0.569912	0.057727		1.54154	0.323655
							2.31786	2.37536		25	11.6667		1.71825	1.46354		0.181625	3.29318
							1.17265	2.57772		8	11.6667		0.564065	1.40918		0.562478	2.05446
							1.36708	0.985152		9	6.66667		1.18846	0.0457085		0.672893	1.26209
							2.50724	1.42165		14.3333	8		0.635774	1.14044		1.39594	1.05289
							3.15307	1.20929		19	7		1.93052	0.80576		1.64893	1.54299
							0.979744	1.08254		11.6667	8.66667		0.668305	0.758802		0.419895	2.56349
							2.48062	2.53761		16.3333	14		1.40922	0.597007		0.742143	1.73791
							3.29785	1.57515		21.6667	8		0.128066	0.265706		2.75335	0.577219
							0.639025	2.05928		4.33333	13.6667		0.233909	0.870465		0.276684	1.42361
							2.77113	1.16426		25	6.33333		1.15247	0.391711		0.627871	0.427971
							0.691821	1.17392		4.33333	10.3333		0.405753	0.418802		0.828517	0.261364
							2.17891	2.62551		12	18.6667		1.22002	1.12492		0.0707715	1.4072
							2.0108	4.44962		12.6667	25		2.12627	2.42534		1.66625	0.951898
							2.36283	2.0168		14.6667	10.3333		0.743056	0.146042		0.228133	1.71842
							2.88794	4.15676		18.3333	26.6667		1.05114	1.68856		2.25702	3.95102
							2.78688	2.54144		15	17.3333		2.44385	0.415412		1.29043	1.84835
							2.99827	2.9739		22	17.3333		1.22204	0.565017		1.63848	0.133659
							1.61639	3.66386		13.3333	21.3333		0.512266	0.517936		0.80296	4.25751
							1.6568	2.41983		9.66667	11		0.318236	0.299559		2.93287	1.33217
							2.149	1.07825		13.3333	6		0.778226	0.455954		1.42975	0.351712
							0.971186	0.809081		9	5.33333		1.63542	0.395458		0.406345	0.643595
							1.12313	1.34022		8.66667	7.33333		0.351003	0.306796		1.93173	0.733816
							1.08633	1.62552		9.33333	8.33333		0.690928	0.498806		3.43717	1.48251
							2.37306	2.72356		15.3333	18.6667		1.20975	1.23135		0.59206	2.30318
							1.79051	1.40058		16.3333	8.66667		0.753036	0.812503		0.328083	1.27307
							1.54585	1.83684		11.3333	11.3333		0.290694	0.556832		0.326423	0.858114
							1.91506	3.77404		15	20.6667		0.0465856	5.59431		0.754052	2.61411
							2.8433	1.18403		23.3333	6.66667		1.36825	0.325497		2.28109	0.490535
							1.14229	1.28249		9.5	7.33333		1.10835	0.369023		0.492397	0.314327
							3.19947	2.45793		17	12.3333		1.4624	1.13304		2.57456	1.96932
							2.59498	2.29983		18.3333	10.6667		0.377772	0.99996		1.90609	0.762079
							1.86798	2.55467		16	13.6667		0.202026	2.76989		0.703031	1.51859
							3.67111	2.24826		17	9.33333		0.0742525	1.55828		2.27077	0.788797
							2.58427	2.6312		16	14.6667		0.61201	1.91671		4.10873	1.72239
							2.77557	1.85088		15	10		0.857463	0.110213		0.614591	1.291
							3.3827	2.915		16	16.6667		1.05801	3.22764		0.776333	1.70855
							0.791631	2.44973		4.66667	14		0.389141	2.96658		0.153167	1.99397
							3.75318	3.819		22.6667	22		1.03403	2.00305		1.91079	2.42548
							2.18513	2.72742		19.3333	18.3333		0.834366	0.804234		4.29022	0.604486
							3.13078	1.31888		18	6.33333		0.499825	1.30161		4.89119	0.477816
							3.19363	2.34401		16.6667	11.3333		0.798102	0.881887		2.01659	0.515371
							1.21092	2.2523		6	13		0.477525	2.44744		0.488375	0.549302
							1.84408	0.989066		10.3333	6		1.58528	0.758628		2.24763	1.45195
							0.820121	3.00431		5	13.3333		0.432118	0.446952		0.668039	0.965039
							1.60933	1.57585		10	8.33333		0.722314	0.153138		1.23369	0.232428
							1.46059	2.62844		10.6667	16		0.348209	2.98405		2.10307	1.27218
							1.50552	0.942909		11.3333	6.66667		0.223694	0.274807		1.78414	0.408698
							1.34709	1.31002		7.66667	8		0.127421	0.711469		0.222837	1.27881
							1.0283	2.02932		6.33333	14		0.762431	1.50255		0.932676	1.5767
								1.76279			11.3333			0.563465			0.526857
								2.58785			13.6667			0.330712			0.530413
								1.42813			7			0.348645			1.58871
								1.40049			8			1.7873			1.09882
								1.37088			7.33333			0.318229			0.864076
								3.32425			21.6667			3.94236			0.241582
								1.67372			9.33333			0.691397			1.72861
								5.46852			20			0.222255			1.04164
								1.65356			9.33333			0.774437			0.733862
								0.986823			6.33333			0.466777			0.282775
								1.83835			8.66667			0.814899			1.13859
								3.54347			18.6667			2.63748			2.67724
								2.1603			13.6667			2.88206			0.882019
								2.14464			13.3333			1.00663			0.975088
								1.86204			10.6667			0.225911			1.95557
								1.14114			6.66667			0.597277			1.20989
								2.17294			20.6667			1.21804			0.875334
								2.48258			16			1.22279			0.633464
								0.879822			5.33333			0.347073			0.452805
								0.865911			5.66667			0.669593			0.362945
								1.28983			12.3333			0.460917			1.3398
								1.79615			10			0.140005			1.02586
								3.21164			13			1.05988			3.39776
								3.40137			16			0.641439			1.03109
								2.41109			14			0.465694			2.26036
[truncated: 1,602 more columns]
