# Supplementary material for: Suppressed prefrontal neuronal firing variability and impaired social representation in IRSp53-mutant mice
Source: eLife. 2022 Nov 1;11:e74998. doi: 10.7554/eLife.74998 (PMC9662818; doi:10.7554/eLife.74998)
Supplement: Figure 6—source data 1. — The excel file contains the numerical data used to generate Figure 6A–C. [file elife-74998-fig6-data1.xlsx]

## Sheet: Fig 6
	Fig 6A	Fraction of ISI (Baseline)					Fig 6B	Fraction of ISI (Linear chamber)					Fig 6C	Burst proportion (%)
		WT		KO				WT		KO			WT		KO
	ISI (ms)	Mean	SEM	Mean	SEM		ISI (ms)	Mean	SEM	Mean	SEM		Rest	LC	Rest	LC
	2	NaN	NaN	NaN	NaN		2	0.000552014	7.96301e-05	0.00118297	0.000198431		2.68456	3.21888	0	0.441926
	4	0.00424898	0.00150788	0.00349429	0.00109269		4	0.00452926	0.00138405	0.00222187	0.00030715		11.018	10.0369	0	0.402414
	6	0.0112405	0.00173049	0.00677051	0.00135815		6	0.00925471	0.00119692	0.00430945	0.000422424		3.77359	6.85125	0.621504	0.551109
	8	0.0173935	0.00239438	0.0099631	0.00129484		8	0.0122198	0.000945903	0.00748451	0.000605694		2.91942	2.46892	1.59956	1.07615
	10	0.0124377	0.0010617	0.0125122	0.00145229		10	0.0130603	0.000753962	0.00912787	0.000585711		1.0582	0.725201	0.56926	0.54059
	12	0.0132307	0.00116117	0.0104642	0.000756601		12	0.0139717	0.000660456	0.0106245	0.000597931		5.00596	7.6595	0.428725	0.459557
	14	0.0109569	0.000743843	0.0120353	0.000893642		14	0.0133903	0.00056972	0.0106568	0.00054122		0.695652	2.20946	1.91388	1.84088
	16	0.0111303	0.00102581	0.0112728	0.000742676		16	0.012867	0.000526676	0.0112669	0.00054808		1.3683	1.71585	0	0.468847
	18	0.00909896	0.000648091	0.00997364	0.00060635		18	0.0117889	0.000480461	0.0101431	0.000474983		2.23048	2.9859	3.20023	2.21479
	20	0.0108423	0.00100946	0.00957124	0.000588161		20	0.0116687	0.000488692	0.0103858	0.000473887		0	1.66028	0.610998	0.707246
	22	0.00831334	0.000597671	0.00950566	0.000561033		22	0.0108138	0.000469075	0.0100216	0.000441379		0	0	0	1.35918
	24	0.00847935	0.000606923	0.0101474	0.000610377		24	0.0104115	0.000437391	0.00964952	0.000427573		0	1.81509	2.24719	2.09193
	26	0.0116754	0.00429086	0.00846333	0.000497212		26	0.010276	0.000435891	0.00937083	0.000411543		0	0.381437	4.57023	4.65668
	28	0.00893699	0.00164177	0.00784541	0.0004879		28	0.00948518	0.000413262	0.00881265	0.000386714		1.06707	1.29284	1.95823	1.76005
	30	0.00807734	0.000574093	0.00783618	0.000472104		30	0.00943029	0.000421388	0.00865175	0.000385159		2.72109	1.44242	1.4245	2.52151
	32	0.00694312	0.000505255	0.008682	0.00063883		32	0.00913201	0.000401588	0.00847592	0.000376579		5.66547	4.25301	4.65116	3.79967
	34	0.00641615	0.000478618	0.00768955	0.000459283		34	0.0091478	0.000402849	0.00831755	0.00037334		8.41943	9.4612	0.694444	1.51575
	36	0.00659128	0.000495384	0.00727575	0.000439984		36	0.00863028	0.000380812	0.00776035	0.00033608		0.698487	1.241	0	0.487815
	38	0.00663511	0.000451791	0.0071738	0.000459068		38	0.00889084	0.000381337	0.00814041	0.000342631		0.858369	0.926539	2.74809	2.22891
	40	0.00703479	0.000618994	0.00758276	0.000448846		40	0.00877083	0.00038402	0.00792148	0.000340994		0	1.15761	8.47458	6.15185
	42	0.00621507	0.000460051	0.00744274	0.000413796		42	0.00850332	0.000355348	0.00758628	0.000329262		0	2.74348	6.26896	3.47519
	44	0.00649304	0.00049899	0.00697104	0.000406677		44	0.00856888	0.000353956	0.00759857	0.000322116		8.12676	7.95701	3.89972	4.49863
	46	0.00628291	0.00047809	0.00686371	0.000423965		46	0.0081439	0.00034258	0.00719956	0.000302347		0	0	19.0722	43.8431
	48	0.0080746	0.001513	0.00693438	0.000472638		48	0.00853152	0.000332449	0.00739699	0.000301152		1.50376	1.06283	0	0.880894
	50	0.00741665	0.000967946	0.00682833	0.000399386		50	0.00818755	0.000317763	0.00714756	0.000291272		0	0	0.938967	1.123
	52	0.00725688	0.000947033	0.00691612	0.000443559		52	0.00829169	0.000327548	0.00713188	0.000294981		0.788955	1.90768	4.5398	4.23366
	54	0.0064465	0.000442531	0.00660853	0.000453928		54	0.00787164	0.000303828	0.00710678	0.000265272		1.49813	1.20881	1.76282	2.59293
	56	0.00655567	0.000447806	0.00638261	0.000371446		56	0.00800091	0.000311456	0.0072306	0.000278643		0.11274	0.340766	6.89655	3.16689
	58	0.00718068	0.000581713	0.0067212	0.000390861		58	0.00805714	0.000295573	0.00730341	0.000274362		0.25528	0.496545	2.5974	1.27023
	60	0.00597277	0.000366783	0.0069099	0.00041529		60	0.00766784	0.000287976	0.00700822	0.000253551		0	0.99435	0.944947	1.46442
	62	0.00646994	0.000438665	0.006214	0.000439434		62	0.0080499	0.000281199	0.00689857	0.000254115		1.38408	1.13674	1.15911	1.82009
	64	0.00620049	0.000571791	0.00636439	0.00044494		64	0.00761703	0.000261537	0.00666291	0.000249764		1.88679	1.60016	0	0.129568
	66	0.00603578	0.000386117	0.00666862	0.000370914		66	0.00791059	0.000267821	0.00683772	0.000248835		0	0.231481	47.3282	50.1365
	68	0.00729872	0.0011178	0.00676663	0.000452953		68	0.00786567	0.000255121	0.0068223	0.000232319		0	0.234467	4.65116	3.77085
	70	0.0058396	0.000382739	0.00622266	0.000363557		70	0.00774203	0.000258624	0.00695813	0.000225258		1.01523	0.801316	5.37757	3.02078
	72	0.00602019	0.000396559	0.00564767	0.000332394		72	0.00753732	0.000244887	0.00653224	0.000226008		0.974421	0.998727	12.4341	16.9541
	74	0.00725948	0.000804073	0.00630972	0.000393507		74	0.00760847	0.00023431	0.00669569	0.000226365		1.26582	3.33272	2.51127	4.46763
	76	0.0055572	0.000356233	0.00621338	0.000502594		76	0.00735943	0.000238112	0.00662879	0.0002149		0	1.21819	0.896057	0.541419
	78	0.00648877	0.00044355	0.00621789	0.00039718		78	0.00758459	0.000220779	0.00663214	0.000213281		1.19403	1.65438	3.10078	6.81199
	80	0.00646789	0.000432185	0.00620249	0.000428342		80	0.0074155	0.000210955	0.00651067	0.000213672		1.65138	2.96812	0	0
	82	0.00610319	0.000488436	0.00642415	0.000440891		82	0.00714564	0.000202463	0.00650244	0.000198955		1.96335	2.82791	0	0.989569
	84	0.0059274	0.000396746	0.00625523	0.000372213		84	0.00729905	0.000208534	0.00654365	0.000211862		5.2348	8.18773	6.44012	5.99037
	86	0.00512223	0.000325296	0.00619454	0.000385649		86	0.0072799	0.000198708	0.00649761	0.000194839		1.9685	2.5089	5.09434	7.0906
	88	0.00652042	0.000507351	0.006077	0.000374124		88	0.00718743	0.000192923	0.00658149	0.00019228		3.08452	2.78781	35.7143	7.58656
	90	0.00543015	0.000390985	0.00583232	0.000338678		90	0.00694539	0.000182832	0.00611616	0.000183534		2.31587	2.1162	4.25725	3.4051
	92	0.00557283	0.000370901	0.00622024	0.000356794		92	0.00698679	0.000180537	0.00645356	0.000191598		2.52207	4.05632	7.79221	2.71158
	94	0.00568688	0.000397438	0.00559986	0.000304939		94	0.00695811	0.00017583	0.00640203	0.000173782		0	0.236492	1.21212	3.7328
	96	0.00621654	0.000448509	0.00546361	0.000329407		96	0.0070212	0.000180491	0.00638011	0.000180551		16.1351	18.3065	0	1.03357
	98	0.00632038	0.0005201	0.00516086	0.000280826		98	0.00683859	0.000178493	0.0062892	0.000174679		2.86299	3.56346	3.32986	3.13181
	100	0.00572895	0.000457659	0.00527901	0.000293401		100	0.00636637	0.000145276	0.00616908	0.000170479		3.67592	5.16936	6.26186	8.97401
													2.29575	3.81602	7.57576	11.4287
													13.6	19.5364	16.4179	26.7536
													0	0.892857	4.55532	5.32942
													2.5641	2.35614	3.0888	4.78058
													1.86916	2.38908	6.21762	3.25349
													5.41696	5.79403	0.526316	0.515464
													0.863931	0.988003	4.63576	4.79042
													2.28448	2.14425	2.1181	2.90289
													4.25532	2.78699	8.12937	8.62705
													4.74255	6.25	2.54372	3.24814
													3.86847	3.21618	8.21622	9.79941
													4.31655	3.60436	5.41205	7.01993
													5.61308	7.07577	6.47482	5.86449
													3.18471	11.892	3.04659	3.13175
													3.76175	3.27586	3.83305	2.9648
													8.57143	6.74054	2.85714	2.40964
													3.36135	2.70936	0.902935	1.32217
													9.27152	7.67455	5.32915	2.70868
													5.06329	5.28012	1.22768	0.811001
													4.32596	15.0955	6.30631	4.03281
													4.84849	5.3971	0	0.0773994
													23.4448	27.1573	0.823045	0.656814
													4.6875	3.78788	0	0.0794281
													5.37084	5.10949	5.32007	3.52371
													1.71429	2.87111	0.274348	0.781904
													17.1504	21.801	0	0.33583
													4.73684	7.10399	0.386847	0.223129
													3.77778	3.99346	5.09761	5.50989
													10.1728	8.6989	2.56849	2.84149
													9.80445	12.149	3.73444	4.2184
													57.8877	156.296	1.07527	2.859
													61.9704	168.839	3.37909	2.80758
													15.3846	12.7292	0	1.4507
													0	0	5.25148	4.90123
													1.83486	1.16407	6.88652	8.90308
													2.53165	1.89925	0.632244	0.755814
													6.95652	5.80704	3.6097	3.50168
													10	5.93368	0	0.896552
													7.40741	4.07816	2.82686	3.22961
													10.5263	10.3567	4.38247	2.06896
													10.2941	13.6681	7.08812	5.383
													9.6	15.1665	3.31126	2.02183
													3.15421	3.95571	5.02283	3.26181
													13.3763	13.1751	4.69121	4.44472
													1.95122	4.33553	0	0
													4.63576	5.04484	0	0.143369
													5.91716	7.68463	6.51997	9.7122
													4.47059	2.57478	1.02041	1.23886
													3.125	3.55576	3.63735	3.81965
													6.61818	7.61062	0	1.21951
													0	1.49445	0.848656	1.46138
													0	1.71039	9.93378	7.68923
													6.92913	7.2535	11.1732	7.19785
													2.44328	2.09765	8.38323	6.13471
													1.9802	2.03416	4.6875	4.2495
													0.266312	0.527757	5.80913	4.13442
													0	5.98471	1.42737	1.50157
													2.97483	5.59047	5.04202	4.71074
													3.77359	4.44789	1.0989	1.12633
													5.76923	4.99266	2.99076	2.82961
													17	21.0421	6.88296	4.37658
													3.81818	5.24855	23.0769	6.15385
													26.087	9.29586	0	0
													5.40541	6.05186	0	0
													1.0661	1.75602	6.71845	6.30069
													1.83908	1.37603	0	1.36947
													0	0.863063	0	0.0898848
													3.97351	7.02289	0	0.442571
													2.39234	4.00542	0	0.773422
													4.14938	4.17855	2.75862	3.09539
													0	0.810597	2.48854	9.3704
													2.43531	2.5299	2.43902	3.80201
													5.95409	7.39421	3.37798	4.93403
													9.94714	8.76253	0.675676	1.2474
													2.21402	2.44457	10.0817	9.04656
													2.69767	3.26087	2.92683	2.67176
													3.27869	2.86689	0.689655	0.818452
													2.4618	3.18299	0.71048	1.1965
													3.43839	2.93971	13.5952	17.8746
													0	0.773338	4.72973	2.98297
													1.24524	1.52917	0	0.855006
													0.261097	1.51341	14.6739	10.7931
													2.90909	2.17311	0	1.67179
													1.85185	4.37337	0.34965	0.559083
													1.71592	3.10462	0	0.623561
													11.1049	18.4929	0	4.96289
													0	17.7116	5.92593	9.87997
													13.3858	16.0275	0	0.49507
													7.45192	8.5
													0	1.29758	4.31655	4.59295
													25.8462	30.0087	5.24602	3.37316
													13.2791	15.4282	2.35294	3.1101
													2.35935	3.64559	2.34742	1.60175
													26.7813	26.0693	2.04082	7.45069
													0	1.13643	37.5	18.5561
													9.07298	9.55913	11.8056	11.529
													3.4134	3.5626	15.3253	15.5749
													79.2404	236.253	1.66667	3.60559
													2.21402	3.58858	8	4.57046
													0.465658	4.28316	0	0.537996
													7.03206	8.57094	3.48343	2.8896
													4.13081	3.25203	2.8632	1.82819
													14.0401	11.5908	3.6963	3.09379
													2.81911	7.91935	3.8746	3.24444
													15.1515	15.5504	4.36652	4.02122
													7.45763	5.39637	6.17284	5.50298
													4.59016	3.9321	16.4891	14.5012
													3.63891	3.93125	1.83969	1.85651
													3.21839	4.04884	0.680272	1.19816
													9.11063	11.9846	4	4.01606
													6.2448	9.46078	0	0.352526
													1.07383	10.9626	1.19403	4.74243
													3.92707	7.71078	6.95489	5.39617
													11.0542	13.1401	9.38278	11.5368
													14.4927	13.0838	0	0
													2.32558	2.37402	0.308642	0.317083
													12.1951	7.84637	1.70454	1.50738
													11.1111	5.38807	21.0418	22.6945
													5.22774	7.06292	0.967742	1.8936
													4.36562	5.31537	5.93792	6.52647
													0	1.25371	4.16667	3.60825
													0	5.73604	12.3457	11.543
													9.09091	11.6173	0.547196	0.609185
													8.68687	6.62199	0	0
													0	0.356983	0.562588	1.1599
													2.76817	2.99952	1.71359	1.54723
													0.817661	0.569358	1.2987	1.0425
													20.915	25.9538	0	0
													2.1978	2.2113	2.15947	1.67156
													7.69231	5.34045	1.84615	1.62999
													15.1955	12.4623	3.84615	1.69935
													27.7562	39.1254	9.04033	13.2909
													0	1.1811	2.9582	1.93087
													2.28137	2.17722	7.01754	3.30827
													0.124533	0.338674	1.14068	0.525131
													0	0.140944	2.73644	2.30294
													25.9366	34.9705	0	0.192308
													0	0.164677	0	0.095057
													1.09777	0.789889	5	1.4435
													0.536193	0.657895	0	0.428954
													2.13363	2.23335	3.06681	8.43509
													0.598205	0.828797	0.847009	0.903849
													2.05479	1.42609	8.01047	6.69193
													2.56798	3.35755	1.13852	0.584624
													0	0.25	3.28767	5.33333
													4.78326	6.66263	3.91061	4.033
													1.89846	2.60513	13.0215	14.1867
													3.27381	8.43198	3.0303	3.47942
													5.25378	5.28634	35.2023	65.9509
													1.41498	1.13759	7.64381	9.2349
													3.36943	3.43884	5.92353	6.6943
													4.65116	4.5045	3.56313	4.17456
													0	3.36788	0	0.136193
													7.10945	6.94303	7.98005	6.69056
													17.1123	26.7551	7.88177	9.78613
													12.5	10.9091	0.689061	0.834879
													20.5128	10.4972	9.47867	4.14727
													1.8018	1.09005	2.04082	8.81762
													0.934579	1.33745	7.27459	7.03934
													3.82166	4.689	5.71429	5.25324
													11.3208	8.98785	1.50376	2.89288
													0.763359	1.125	0.776197	1.41039
													63.5135	105.519	0	0.739523
													5.48246	5.38299	0.378072	0.775352
													3.55987	5.42846	6.06158	6.16323
													17.8914	21.0183	2.5641	3.65831
													7.10784	9.08535	2.46734	2.71739
													3.57143	2.28157	12.4762	12.433
													7.18722	11.5019	2.09424	3.6603
													3.01003	3.74583	1.22741	1.16481
													14.2202	18.7859	4.94059	3.92799
													15.3846	11.3779	0.945423	6.27668
													9.9352	10.0221	1.83299	1.65123
													0	5.26692	1.43541	0.926316
													2.29885	3.30748	3.99624	3.30958
													4.51306	4.05017	7.62436	9.85163
													0	4.0759	3.80952	3.8512
													6.95518	6.59945	4.70852	4.12598
													3.99113	2.47098	13.3333	5.92334
													6.14035	7.34824	1.06383	1.07772
													6.45161	2.58524	11.7647	6.31741
													0	3.61009	6.66667	3.59712
													4.10256	4.61464	7.9641	9.40054
															9.02982	7.81827
															11.9589	12.109
															4.25964	4.52979
															7.29927	4.52275
															1.31772	2.5076
															5.44355	4.54787
															2.2187	2.30326
															10.3755	23.8645
															3.96158	3.83955
															1.67464	2.34543
															0	2.73022
															8.59023	8.08211
															0.660884	0.537682
															4.97512	5.63468
															3.2481	2.69861
															0.263852	0.106129
															7.36312	5.65108
															9.87234	11.3249
															0.665188	0.854904
															0	0.0621504
															1.22699	1.0757
															0.158353	0.367175
															27.2727	1.02291
															3.03541	4.78966
															6.03448	0.809951
