# Supplementary material for: Suppressed prefrontal neuronal firing variability and impaired social representation in IRSp53-mutant mice
Source: eLife. 2022 Nov 1;11:e74998. doi: 10.7554/eLife.74998 (PMC9662818; doi:10.7554/eLife.74998)
Supplement: Figure 7—figure supplement 1—source data 1. — The excel file contains the numerical data used to generate Figure 7—figure supplement 1A–H. [file elife-74998-fig7-figsupp1-data1.xlsx]

## Sheet: Fig 7_S1
	Fig 7_S1A	Number of spikes
	Current	WT																								KO
	0	0	0	0	0	0	0	0	0	0	0	0	0	0	0	0	0	0	0	0	0	0	0	0	0	0	0	0	0	0	0	0	0	0	0	0	0	0	0	0	0	0	0	0	0	0	0	0
	50	0	0	0	0	0	0	0	0	0	0	0	0	0	0	0	0	0	0	1	0	0	0	0	0	0	0	0	0	0	0	0	0	0	0	0	0	0	0	0	0	0	0	0	0	0	0	0
	100	0	2	0	0	1	0	0	0	0	0	0	0	0	0	0	0	0	0	0	0	0	0	0	0	0	0	0	0	0	0	0	2	0	0	0	0	0	0	0	0	0	0	0	0	2	0	0
	150	0	5	2	4	5	3	0	0	0	0	2	0	1	0	0	0	0	0	0	0	4	0	0	1	0	2	0	0	0	0	0	6	4	0	4	0	0	1	4	2	0	0	0	0	5	0	0
	200	0	7	5	10	8	6	0	3	0	3	5	0	4	2	0	0	0	0	1	2	7	0	0	4	1	6	0	0	1	1	3	9	7	0	6	1	0	6	6	4	3	1	0	0	8	4	0
	250	2	10	7	15	10	8	0	6	0	5	7	1	8	4	1	2	0	2	2	4	11	0	0	6	3	8	0	1	3	5	6	11	10	1	8	5	0	8	9	6	6	4	0	1	10	7	0
	300	4	12	9	19	12	10	1	8	0	8	9	4	10	6	4	5	2	5	4	7	12	4	0	9	7	10	0	2	5	7	7	12	13	3	11	7	1	12	10	7	7	6	0	5	12	9	1
	350	5	14	11	22	14	11	2	10	2	10	11	6	12	8	7	8	5	8	7	9	14	6	1	11	9	12	0	6	6	9	9	13	15	6	12	9	2	15	12	10	9	6	1	7	14	11	2
	400	6	15	12	20	15	13	5	11	4	11	13	8	13	10	9	11	7	10	9	10	15	9	3	12	11	14	1	7	9	12	10	15	18	7	14	12	5	17	14	11	11	8	4	9	16	13	6
	Fig 7_S1B	Input resistance				Fig 7_S1C	AP threshold				Fig 7_S1D	AP amplitude				Fig 7_S1E	FWHM				Fig 7_S1F	AHP amplitude
	WT	WT+mem	KO	KO+mem		WT	WT+mem	KO	KO+mem		WT	WT+mem	KO	KO+mem		WT	WT+mem	KO	KO+mem		WT	WT+mem	KO	KO+mem
	89.1547	121.556	100.293	96.2464		-35.7666	-43.8538	-39.6729	-40.2832		76.7822	58.2581	56.8543	83.6487		1.18808	3.75197	1.29153	1.85799		5.09644	6.53076	4.69971	5.27954
	155.847	133.637	109.26	115.952		-32.3181	-40.4358	-38.0554	-41.2903		48.1567	81.3904	60.5164	84.9304		1.48365	1.88212	1.45438	1.83767		6.19507	7.47681	6.19507	6.68335
	123.275	73.6466	62.705	97.2365		-33.9355	-47.3022	-38.4827	-37.9334		52.3682	85.4492	63.7817	70.6177		1.60789	1.91372	1.05704	1.86565		5.31006	3.60107	8.08716	3.8147
	145.404	116.186	125.58	99.4877		-36.4075	-40.3137	-31.9214	-37.5366		88.501	79.9561	43.2129	68.634		1.34888	1.78843	1.2987	1.7575		8.17871	5.12695	5.15747	4.39453
	129.138	92.8023	119.124	140.468		-36.8347	-39.917	-27.6184	-42.5415		75.8057	79.1626	37.1704	79.7729		1.16177	1.60852	1.48827	1.42182		5.73731	3.96728	5.73731	8.42285
	103.688	78.3725	113.626	152.463		-34.5459	-49.8657	-37.5061	-49.53		69.4885	76.3245	56.7322	82.9163		1.67381	1.20668	1.39059	1.80808		4.15039	4.18091	7.69043	0.701904
	65.9681	137.131	83.1932	106.476		-40.6189	-33.7524	-43.1213	-41.2598		85.1135	58.7463	69.458	83.5876		1.18361	1.65286	1.39194	1.71283		3.78418	4.21143	5.34058	4.63867
	99.3959	80.3962	131.774	80.5956		-37.9944	-36.377	-41.9922	-43.8232		75.3784	69.0918	78.125	74.4019		1.12723	1.62515	1.33514	1.27064		5.12695	5.09644	9.552	4.39453
	58.0816	88.7108	136.144	64.3814		-44.9829	-50.5981	-54.4739	-51.2085		66.0095	66.5283	91.7053	89.447		1.12978	1.48605	1.23486	1.2149		2.22778	3.90625	0.305176	4.94385
	99.9557	127.198	79.0931	105.81		-41.3208	-37.4451	-44.4641	-43.396		81.0242	79.834	78.6438	80.6885		1.49002	1.4391	1.22003	1.77798		4.76074	6.5918	6.04248	5.76782
	93.2554	93.7629	104.315	92.8552		-50.8728	-35.8582	-40.1001	-44.4641		78.6743	81.2378	77.8809	88.8062		1.36965	1.4846	1.07753	1.34074		5.40161	6.01196	6.31714	5.06592
	86.5592	99.9278	75.9065	92.3182		-37.6282	-41.9312	-58.0139	-57.4951		61.5845	84.0759	93.5059	86.2427		1.20974	1.44697	2.62708	1.92578		4.05884	6.43921	0.030518	0.274658
	91.1876	82.3231	68.0398	43.078		-44.2505	-39.1846	-40.7715	-37.628		86.853	77.5757	79.5593	85.785		1.10856	1.32028	0.90778	1.057		6.01196	4.54712	6.22559	3.357
	78.1004	124.755	125.647	46.791		-42.7246	-40.5579	-42.2058	-39.948		86.5173	73.7915	69.519	87.646		1.43542	1.6115	1.15154	1.115		4.42505	6.19507	8.36182	1.129
	72.5526	50.673	110.838	74.308		-40.9546	-46.021	-40.5579	-42.236		90.8508	75.195	76.8127	80.475		1.2002	1.161	1.15533	1.144		4.36401	2.258	6.80542	4.822
	69.6752	76.644	131.143	43.582		-46.4478	-37.476	-42.5415	-37.598		85.5713	77.515	74.3713	83.984		1.02852	0.992	1.34155	0.954		3.57056	2.441	6.46973	1.434
	60.4884	48.476	103.428	52.295		-43.8843	-33.966	-35.9802	-31.464		87.6465	77.82	58.9905	75.592		1.02171	1.216	1.82142	1.011		4.76074	2.258	3.69263	6.073
	71.7789	64.426	84.1113			-41.4429	-33.966	-42.9993			78.9185	74.371	81.2073			1.06595	1.138	1.39916			4.63867	2.655	5.34058
	93.1249		84.4119			-49.2554		-36.438			73.3337		69.1834			1.59475		1.74094			6.71387		1.67847
	64.922		96.0441			-34.119		-48.645			75.378		64.9719			1.753		1.68378			-6.683		5.61523
	72.627		122.446			-36.652		-35.187			78.552		70.618			1.465		1.496			-5.829		-4.272
	57.353		86.665			-34.424		-32.867			78.278		76.447			1.075		1.406			2.228		-3.448
	43.172		55.929			-41.626		-38.727			83.862		75.256			1.041		1.232			4.089		2.686
	65.01					-34.607					78.674					1.13					3.021
	Fig 7_S1H	Burst proportion
	Current	WT																								KO
	0
	50																			0
	100		0			0																											0													0
	150		0	0	50	0	0					0		0								50			0		0						0	0		0			0	0	0					0
	200		0	0	20	0	0		0		0	40		0	0					0	0	28.5714			0	0	0			0	0	0	0	0		0	0		0	0	0	0	0			25	0
	250	0	0	0	13.3333	0	0		0		0	28.5714	0	0	0	0	100		0	0	0	18.1818			0	0	0		0	0	0	0	0	0	0	0	0		0	0	0	0	0		0	20	28.5714
	300	0	0	22.2222	15.7895	16.6667	0	0	0		0	22.2222	0	20	0	0	40	0	40	0	0	16.6667	0		0	0	20		0	0	0	0	0	0	0	0	0	0	0	0	0	0	0		0	16.6667	22.2222	0
	350	0	14.2857	18.1818	13.6364	14.2857	0	0	0	100	0	18.1818	33.3333	16.6667	25	28.5714	25	0	25	0	0	14.2857	0	0	0	22.2222	16.6667		0	0	0	0	0	0	0	16.6667	0	0	13.3333	16.6667	0	0	0	0	0	14.2857	18.1818	100
	400	0	13.3333	16.6667	15	13.3333	0	0	0	50	0	15.3846	25	15.3846	20	22.2222	18.1818	0	20	22.2222	0	13.3333	22.2222	0	16.6667	18.1818	14.2857	0	0	0	0	0	13.3333	0	0	14.2857	0	0	11.7647	14.2857	0	0	0	0	22.2222	12.5	15.3846	33.3333
