# Supplementary material for: Suppressed prefrontal neuronal firing variability and impaired social representation in IRSp53-mutant mice
Source: eLife. 2022 Nov 1;11:e74998. doi: 10.7554/eLife.74998 (PMC9662818; doi:10.7554/eLife.74998)
Supplement: Figure 7—source data 1. — The excel file contains the numerical data used to generate Figure 7B–G. [file elife-74998-fig7-data1.xlsx]

## Sheet: Fig 7
	Fig 7B	Number of spikes
	Current	WT																								WT+memantine
	0	0	0	0	0	0	0	0	0	0	0	0	0	0	0	0	0	0	0	0	0	0	0	0	0	0	0	0	0	0	0	0	0	0	0	0	0	0	0	0	0	0
	50	0	0	0	0	0	0	0	0	0	0	0	0	0	0	0	0	0	0	1	0	0	0	0	0	0	0	0	0	0	0	0	0	0	0	0	0	0	0	0	0	0
	100	0	2	0	0	1	0	0	0	0	0	0	0	0	0	0	0	0	0	0	0	0	0	0	0	0	3	0	0	0	2	1	0	6	2	0	0	0	0	0	0	0
	150	0	5	2	4	5	3	0	0	0	0	2	0	1	0	0	0	0	0	0	0	4	0	0	1	2	7	2	4	0	5	4	0	7	6	4	0	4	0	0	0	0
	200	0	7	5	10	8	6	0	3	0	3	5	0	4	2	0	0	0	0	1	2	7	0	0	4	5	10	4	6	0	7	6	1	10	8	7	0	6	0	0	0	0
	250	2	10	7	15	10	8	0	6	0	5	7	1	8	4	1	2	0	2	2	4	11	0	0	6	7	13	6	8	0	9	8	2	11	10	9	3	9	0	0	1	1
	300	4	12	9	19	12	10	1	8	0	8	9	4	10	6	4	5	2	5	4	7	12	4	0	9	9	13	7	10	1	11	9	5	12	11	11	5	11	1	1	3	3
	350	5	14	11	22	14	11	2	10	2	10	11	6	12	8	7	8	5	8	7	9	14	6	1	11	11	15	10	11	3	12	10	8	12	13	12	7	12	1	3	4	4
	400	6	15	12	20	15	13	5	11	4	11	13	8	13	10	9	11	7	10	9	10	15	9	3	12	11	15	10	12	4	13	11	11	2	13	13	9	13	1	5	6	6
	Fig 7C	Number of spikes
	Current	KO																							KO+memantine
	0	0	0	0	0	0	0	0	0	0	0	0	0	0	0	0	0	0	0	0	0	0	0	0	0	0	0	0	0	0	0	0	0	0	0	0	0	0	0	0	0
	50	0	0	0	0	0	0	0	0	0	0	0	0	0	0	0	0	0	0	0	0	0	0	0	0	0	0	0	0	5	0	0	0	0	0	0	0	0	0	0	0
	100	0	0	0	0	0	0	0	2	0	0	0	0	0	0	0	0	0	0	0	0	2	0	0	2	3	0	0	4	10	1	0	0	0	0	0	0	0	0	0	0
	150	0	2	0	0	0	0	0	6	4	0	4	0	0	1	4	2	0	0	0	0	5	0	0	5	7	3	3	8	13	3	0	0	2	0	6	0	0	0	0	0
	200	1	6	0	0	1	1	3	9	7	0	6	1	0	6	6	4	3	1	0	0	8	4	0	7	8	5	6	11	17	6	3	3	6	2	9	0	0	0	0	0
	250	3	8	0	1	3	5	6	11	10	1	8	5	0	8	9	6	6	4	0	1	10	7	0	9	10	7	8	13	19	8	7	5	9	6	12	0	0	6	0	0
	300	7	10	0	2	5	7	7	12	13	3	11	7	1	12	10	7	7	6	0	5	12	9	1	10	12	9	10	15	21	10	9	8	12	6	13	0	0	10	2	4
	350	9	12	0	6	6	9	9	13	15	6	12	9	2	15	12	10	9	6	1	7	14	11	2	11	13	10	12	17	23	11	13	10	14	7	11	2	1	14	5	6
	400	11	14	1	7	9	12	10	15	18	7	14	12	5	17	14	11	11	8	4	9	16	13	6	12	14	11	13	18	24	12	15	13	15	8	3	5	4	17	8	8
	Fig 7E	Burst proportion
	Current	WT																								WT+memantine
	0
	50																			0
	100		0			0																					0				0	0		0	0
	150		0	0	50	0	0					0		0								50			0	0	0	0	0		0	0		0	0	0		0
	200		0	0	20	0	0		0		0	40		0	0					0	0	28.5714			0	0	0	0	0		0	0	0	0	0	0		0
	250	0	0	0	13.3333	0	0		0		0	28.5714	0	0	0	0	100		0	0	0	18.1818			0	0	0	0	0		0	0	0	0	0	0	0	0			0	0
	300	0	0	22.2222	15.7895	16.6667	0	0	0		0	22.2222	0	20	0	0	40	0	40	0	0	16.6667	0		0	0	0	0	0	0	0	0	0	0	0	0	0	0	0	0	0	0
	350	0	14.2857	18.1818	13.6364	14.2857	0	0	0	100	0	18.1818	33.3333	16.6667	25	28.5714	25	0	25	0	0	14.2857	0	0	0	0	0	20	0	0	0	0	0	0	0	0	0	0	0	0	0	0
	400	0	13.3333	16.6667	15	13.3333	0	0	0	50	0	15.3846	25	15.3846	20	22.2222	18.1818	0	20	22.2222	0	13.3333	22.2222	0	16.6667	0	13.3333	20	0	0	0	0	18.1818	0	0	0	22.2222	0	0	0	0	0
	Fig 7G	Burst proportion
	Current	KO																							KO+memantine
	0
	50																													0
	100								0													0			0	0			0	0	0
	150		0						0	0		0			0	0	0					0			0	0	0	0	0	0	0			0		0
	200	0	0			0	0	0	0	0		0	0		0	0	0	0	0			25	0		0	0	0	0	0	0	0	66.6667	66.6667	0	100	22.2222
	250	0	0		0	0	0	0	0	0	0	0	0		0	0	0	0	0		0	20	28.5714		0	0	0	0	0	10.5263	0	85.7143	80	0	66.6667	16.6667			0
	300	0	20		0	0	0	0	0	0	0	0	0	0	0	0	0	0	0		0	16.6667	22.2222	0	0	0	0	0	13.3333	9.52381	0	33.3333	50	16.6667	33.3333	15.3846			0	100	0
	350	22.2222	16.6667		0	0	0	0	0	0	0	16.6667	0	0	13.3333	16.6667	0	0	0	0	0	14.2857	18.1818	100	0	0	0	0	11.7647	8.69565	0	23.0769	20	14.2857	28.5714	18.1818	0	0	0	40	33.3333
	400	18.1818	14.2857	0	0	0	0	0	13.3333	0	0	14.2857	0	0	11.7647	14.2857	0	0	0	0	22.2222	12.5	15.3846	33.3333	0	0	0	15.3846	11.1111	8.33333	0	20	15.3846	13.3333	25	66.6667	0	0	0	25	25
