# Supplementary material for: Suppressed prefrontal neuronal firing variability and impaired social representation in IRSp53-mutant mice
Source: eLife. 2022 Nov 1;11:e74998. doi: 10.7554/eLife.74998 (PMC9662818; doi:10.7554/eLife.74998)
Supplement: Supplementary file 1. [file elife-74998-supp1.xlsx]

## Sheet: Table 1
	Table 1. Recorded Neuron Number
	WT mouse	Cohort #	Number of experiments	Total neurons	pExc neurons	pInh neurons	Analyzed neurons (pExc only, ≥0.5 Hz)
	1	1	8	70	64	4	36
	2	2	10	87	78	7	61
	3	2	9	79	76	3	44
	4	3	9	70	65	2	41
	5	3	11	26	24	1	19
	6	3	10	59	59	0	32
	Total	-	57	391	366	17	233
	KO mouse	Cohort #	Number of experiments	Total neurons	pExc neurons	pInh neurons	Analyzed neurons (pExc only, ≥0.5 Hz)
	1	1	5	24	22	2	19
	2	1	9	31	28	3	17
	3	2	10	52	38	9	27
	4	2	9	42	37	2	26
	5	2	10	70	66	3	40
	6	3	2	12	11	1	10
	7	3	12	62	59	2	44
	8	3	12	101	98	2	75
	Total	-	69	394	359	24	258
