# Supplementary material for: Suppressed prefrontal neuronal firing variability and impaired social representation in IRSp53-mutant mice
Source: eLife. 2022 Nov 1;11:e74998. doi: 10.7554/eLife.74998 (PMC9662818; doi:10.7554/eLife.74998)
Supplement: Supplementary file 2. [file elife-74998-supp2.xlsx]

## Sheet: Statistics
Supplementary file 2 (Statistics)
Figure	Assay Performed	Parameter	Comparison			Descriptive Statistics		Statistical Analysis
			Sex	Age	n	Mean ± SEM	Median (1Q, 3Q)	Statistical Test	Significance	Summary
Figure 1D	in vivo recording	Sniffing duration (s)	M	>12wks	WT = 6 mice KO = 8 mice	WT L = 137.5 ± 14.69 WT R = 182.3 ± 15.34 KO L = 133.9 ± 19.04 KO R = 111.9 ± 14.76	WT L = 139.2 (106.9, 173.5) WT R = 171.4 (148.7, 224.1) KO L = 134.2 (83.43, 177.9) KO R = 120.6 (68.16, 154.1)	Repeated measures of Two-Way ANOVA with Sidak's multiple comparisons test	Interaction p=0.0408 * Sideness p=0.4502 Genotype p=0.0699	WT L vs. R p=0.1256 KO L vs. R p=0.4684 L WT vs. KO p=0.9854 R WT vs. KO p=0.0130*
Figure 1E	in vivo recording	Sniffing duration (s)	M	>12wks	WT = 6 mice KO = 8 mice	WT S = 208.6 ± 7.856 WT O = 124.1 ± 7.008 KO S = 143.2 ± 15.43 KO O = 117.3 ± 20.19	WT S = 207.7 (193.9, 226.3) WT O = 127.4 (110.4, 137.2) KO S = 128.4 (105.1, 190.9) KO O = 111.5 (66.4, 179.2)	Repeated measures of Two-Way ANOVA with Sidak's multiple comparisons test	Interaction p=0.0111 ** Target p=0.0001 *** Genotype p=0.0904	WT S vs. O p=0.0002 *** KO S vs. O p=0.1255 S WT vs. KO p=0.0128 * O WT vs. KO p=0.9408
Figure 1F	in vivo recording	Sniffing duration (s)	M	>12wks	WT = 6 mice KO = 8 mice	WT S = 132.9 ± 9.17 WT O = 154.6 ± 25.67 KO S = 134.6 ± 19.03 KO O = 99.74 ± 13.99	WT S = 131.7 (110.9, 157.4) WT O = 131.1 (122.8, 182) KO S = 123.5 (87.75, 174.3) KO O = 101.1 (67.1, 133.6)	Repeated measures of Two-Way ANOVA	Interaction p=0.1141 Target p=0.7006 Genotype p=0.1950
Figure 1G	in vivo recording	Interaction duration (s)	M	>12wks	WT = 47 experiments/6mice KO = 58 experiments/8 mice	WT S proximal = 73.15 ± 5.368 WT S distal = 220.2 ± 15.36 KO S proximal = 38.34 ± 3.063 KO S distal = 134.0 ± 9.882	WT S proximal = 71.57 (44.64, 96.03) WT S distal = 227.5 (151.4, 308.8) KO S proximal = 34.75 (19.44, 52.04) KO S distal = 136.5 (67.60, 183.8)	Repeated measures of Two-Way ANOVA with Sidak's multiple comparisons test	Interaction p=0.0010** Proximity p<0.0001*** Genotype p<0.0001***	Proximal WT vs. KO p=0.0175* Distal WT vs. KO p<0.0001***
Figure 1H	in vivo recording	Interaction duration (s)	M	>12wks	WT = 47 experiments/6mice KO = 58 experiments/8 mice	WT S proximal = 36.61 ± 3.315 WT S distal = 162.8 ± 16.05 KO S proximal = 29.05 ± 2.3 KO S distal = 181.6 ± 15.89	WT S proximal = 37.00 (18.32, 48.95) WT S distal = 147.6 (62.83, 243.6) KO S proximal = 27.48 (15.80, 39.49) KO S distal = 151.1 (81.26, 290.2)	Repeated measures of Two-Way ANOVA with Sidak's multiple comparisons test	Interaction p=0.2074 Proximity p<0.0001*** Genotype p=0.6598
Figure 1I	in vivo recording	Interaction duration (s)	M	>12wks	WT = 47 experiments/6mice KO = 58 experiments/8 mice	WT O proximal = 44.0 ± 4.504 WT O distal = 127.3 ± 15.32 KO O proximal = 39.61 ± 4.420 KO O distal = 243.6 ± 18.81	WT O proximal = 34.87 (19.59, 63.23) WT O distal = 99.63 (55.96, 169.4) KO O proximal = 30.28 (20.94, 58.74) KO O distal = 214.8 (139.6, 377.3)	Repeated measures of Two-Way ANOVA with Sidak's multiple comparisons test	Interaction p<0.0001*** Distance p<0.0001*** Genotype p<0.0001***	Proximal WT vs. KO p=0.9642 Distal WT vs. KO p<0.0001***
Figure 1J	in vivo recording	Interaction duration (s)	M	>12wks	WT = 47 experiments/6mice KO = 58 experiments/8 mice	WT O proximal = 55.79 ± 7.768 WT O distal = 194.0 ± 17.79 KO O proximal = 26.23 ± 2.841 KO O distal = 196.2 ± 20.53	WT O proximal = 41.61 (21.52, 63.23) WT O distal = 165.2 (107.8, 269.1) KO O proximal = 20.30 (11.24, 35.46) KO O distal = 138.2 (68.49, 336.0)	Repeated measures of Two-Way ANOVA with Sidak's multiple comparisons test	Interaction p=0.2490 Distance p<0.0001*** Genotype p=0.3691
Figure 2C	in vivo recording	Firing rate (Hz)	M	>12wks	WT = 391 neurons/6 mice KO = 394 neurons/8 mice	WT = 2.636 ± 0.2528 KO = 3.401 ± 0.3101	WT = 0.7833 (0.1700, 2.873) KO = 1.443 (0.3833, 4.003)	Mann-Whitney, two-tailed	p=0.0002	***
Figure 2D	in vivo recording	Firing rate (Hz)	M	>12wks	WT = 366 neurons/6 mice KO = 359 neurons/8 mice	WT = 1.985 ± 0.1604 KO = 2.702 ± 0.1899	WT = 0.7533 (0.1692, 2.568) KO = 1.370 (0.3400, 3.377)	Mann-Whitney, two-tailed	p=0.0002	***
Figure 2E	in vivo recording	Firing rate (Hz)	M	>12wks	WT = 17 neurons/6 mice KO = 24 neurons/8 mice	WT = 17.05 ± 3.061 KO = 14.24 ± 3.559	WT = 17.15 (6.300, 27.68) KO = 9.833 (1.631, 18.06)	Mann-Whitney, two-tailed	p=0.3216	ns
Figure 3C	in vivo recording	Neuron proportion (%)	M	>12wks	WT = 232 neurons/6 mice KO = 221 neurons/8 mice	WT total S neuron = 99 WT other neuron = 133 KO total S neuron = 72 KO other neuron = 149		Fisher's exact test	p=0.0328*	*
Figure 3D	in vivo recording	Neuron proportion (%)	M	>12wks	WT = 221 neurons/6 mice KO = 228 neurons/8 mice	WT total O neuron = 86 WT other neuron = 135 KO total O neuron = 87 KO other neuron = 141		Fisher's exact test	p=0.9228	ns
Figure 4A	in vivo recording	Firing rate (Hz) vs. Firing rate (Hz)	M	>12wks	WT = 233 neurons/6 mice KO = 258 neurons/8 mice	WT Slope = 0.9790 ± 0.01749 WT Y-intercept = 0.05867 ± 0.08612 KO Slope = 0.9718 ± 0.01484 KO Y-intercept = 0.01457 ± 0.07734		Simple linear regression	WT vs. KO slope p=0.7530 intercept p=0.4275
Figure 4B	in vivo recording	Firing rate (Hz) vs. Firing rate (Hz)	M	>12wks	WT = 233 neurons/6 mice KO = 258 neurons/8 mice	WT Slope = 0.8123 ± 0.03225 WT Y-intercept = 0.5522 ± 0.1583 KO Slope = 0.9094 ± 0.01844 KO Y-intercept = 0.3082 ± 0.1036		Simple linear regression	WT vs. KO slope p=0.0066**
Figure 4C	in vivo recording	Δfiring rate between targets (Hz)	M	>12wks	WT = 233 neurons/6 mice KO = 258 neurons/8 mice	WT E-E = 0.6645 ± 0.04724 WT fS-O = 1.283 ± 0.09283 WT sS-O = 0.9656 ± 0.08120 KO E-E = 0.6206 ± 0.04342 KO fS-O = 0.9156 ± 0.06033 KO sS-O = 0.8668 ± 0.06828	WT E-E = 0.4029 (0.1696, 0.9413) WT fS-O = 0.8587 (0.3214, 1.713) WT sS-O = 0.5463 (0.2065, 1.255) KO E-E = 0.3834 (0.1778, 0.8372) KO fS-O = 0.5867 (0.2960, 1.217) KO sS-O = 0.4797 (0.2093, 1.235)	Repeated measures of Two-Way ANOVA with Sidak's multiple comparisons test	Interaction p=0.0086** Session p<0.0001*** Genotype p=0.0149*	WT vs. KO E-E p=0.8702 First S-O p=0.0030** Second S-O p=0.7282 WT E-E vs. First S-O p<0.0001*** E-E vs. Second S-O p=0.0009*** First S-O vs. Second S-O p=0.0006*** KO E-E vs. First S-O p<0.0001*** E-E vs. Second S-O p=0.0019** First S-O vs. Second S-O p=0.8937
Figure 4D	in vivo recording	Decoding accuracy (%)	M	>12wks	WT = 100 trials/158 neurons/6 mice KO = 100 trials/158 neurons/8 mice	WT = 88.95 ± 0.7827 KO = 89.70 ± 0.8097	WT = 90.00 (85.00, 95.00) KO = 90.00 (85.00, 95.00)	Mann-Whitney, two-tailed	p=0.5131	ns
Figure 4E	in vivo recording	Decoding accuracy (%)	M	>12wks	WT = 100 trials/58 neurons/6 mice KO = 100 trials/58 neurons/8 mice	WT = 97.95 ± 0.3488 KO = 90.60 ± 0.9164	WT = 100.0 (95.00, 100.0) KO = 92.50 (85.00, 100.0)	Mann-Whitney, two-tailed	p<0.0001	***
Figure 5B	in vivo recording	Firing rate (Hz)	M	>12wks	WT = 233 neurons/6 mice KO = 258 neurons/8 mice	WT = 3.217 ± 0.2199 KO = 3.435 ± 0.2279	WT = 1.790 (0.9016, 4.217) KO = 2.315 (1.162, 4.503)	Mann-Whitney, two-tailed	p=0.1120	ns
Figure 5C	in vivo recording	Firing rate range (Hz)	M	>12wks	WT = 233 neurons/6 mice KO = 258 neurons/8 mice	WT = 13.80 ± 0.4492 KO = 11.95 ± 0.3769	WT = 12.00 (8.333, 17.67) KO = 10.67 (7.000, 15.33)	Mann-Whitney, two-tailed	p=0.0018	**
Figure 5D	in vivo recording	Fraction	M	>12wks	WT = 233 neurons/6 mice KO = 258 neurons/8 mice	WT 0 - 0.1 = 0.4555 ± 0.01704 0.1 - 0.2 = 0.1626 ± 0.004390 0.2 - 0.3 = 0.1233 ± 0.004140 0.3 - 0.4 = 0.09211 ± 0.004170 0.4 - 0.5 = 0.06935 ± 0.004366 0.5 - 0.6 = 0.05246 ± 0.003820 0.6 - 0.7 = 0.02585 ± 0.001976 0.7 - 0.8 = 0.01207 ± 0.0009304 0.8 - 0.9 = 0.004797 ± 0.0003397 0.9 - 1.0 = 0.001915 ± 0.0001077 KO 0 - 0.1 = 0.3371 ± 0.01518 0.1 - 0.2 = 0.1698 ± 0.004253 0.2 - 0.3 = 0.1523 ± 0.0043…	WT 0 - 0.1 = 0.4695 (0.2107, 0.6836) 0.1 - 0.2 = 0.1590 (0.1133, 0.2090) 0.2 - 0.3 = 0.1195 (0.06786, 0.1638) 0.3 - 0.4 = 0.07524 (0.03905, 0.1364) 0.4 - 0.5 = 0.04476 (0.02119, 0.09452) 0.5 - 0.6 = 0.03000 (0.01429, 0.06476) 0.6 - 0.7 = 0.01429 (0.006667, 0.03238) 0.7 - 0.8 = 0.006190 (0.003333, 0.01643) 0.8 - 0.9 = 0.003333 (0.001429, 0.006190) 0.9 - 1.0 = 0.001429 (0.0009524, 0.002381) KO 0 - …	Repeated measures of Two-Way ANOVA with Bonferroni's multiple comparisons test	Interaction p<0.0001*** Normalized FR p<0.0001*** Genotype p=0.1369	WT vs. KO 0 - 0.1 p<0.0001*** 0.1 - 0.2 p>0.9999 0.2 - 0.3 p<0.0001*** 0.3 - 0.4 p<0.0001*** 0.4 - 0.5 p=0.0036** 0.5 - 0.6 p=0.0096** 0.6 - 0.7 p=0.2129 0.7 - 0.8 p=0.3180 0.8 - 0.9 p>0.9999 0.9 - 1.0 p>0.9999
Figure 5E	in vivo recording	Sigma (Hz)	M	>12wks	WT = 233 neurons/6 mice KO = 258 neurons/8 mice	WT = 2.289 ± 0.08624 KO = 2.004 ± 0.06761	WT = 2.050 (1.230, 2.992) KO = 1.800 (1.165, 2.675)	Mann-Whitney, two-tailed	p=0.0222	*
Figure 5F	in vivo recording	log(sigma) vs. log (firing rate)	M	>12wks	WT = 233 neurons/6 mice KO = 258 neurons/8 mice	WT Slope = 0.5211 ± 0.01826 WT Y-intercept = 0.3009 ± 0.02150 KO Slope = 0.5092 ± 0.01979 KO Y-intercept = 0.1312 ± 0.02394		Simple linear regression with slope comparison test	WT vs. KO slope p=0.6588 intercept p<0.0001 ***
Figure 5G	in vivo recording	Sigma (Hz)	M	>12wks	WT = 233 neurons/6 mice KO = 258 neurons/8 mice	WT E-E = 2.650 ± 0.1037 WT fS-O = 2.801 ± 0.1018 WT sS-O = 2.728 ± 0.09880 KO E-E = 2.370 ± 0.07717 KO fS-O = 2.472 ± 0.07995 KO sS-O = 2.431 ± 0.07589	WT E-E = 2.323 (1.316, 3.676) WT fS-O = 2.406 (1.573, 3.629) WT sS-O = 2.356 (1.504, 3.577) KO E-E = 2.059 (1.432, 2.998) KO fS-O = 2.245 (1.473, 3.164) KO sS-O = 2.210 (1.410, 3.235)	Friedman test with Dunn's multiple comparisons test	WT p=0.0107* KO p=0.2231	WT E-E vs. fS-O p=0.0142* WT E-E vs. sS-O p>0.9999 WT fS-O vs. sS-O p=0.0616
Figure 6C	in vivo recording	Burst proportion (%)	M	>12wks	WT = 233 neurons/6 mice KO = 257 neurons/8 mice	WT Rest = 6.054 ± 0.6385 WT LC = 8.648 ± 1.487 KO Rest = 4.525 ± 0.3813 KO LC = 4.576 ± 0.4252	WT Rest = 3.274 (1.146, 7.070) WT LC = 3.932 (1.786, 7.779) KO Rest =2.991 (0.7433, 6.048) KO LC = 3.094 (1.077, 5.390)	Repeated measures of Two-Way ANOVA with Sidak's multiple comparisons test	Interaction p=0.0072** Session p=0.0052** Genotype p=0.0091**	WT vs. KO Baseline p=0.3457 LC p=0.0010** WT Baseline vs. LC p=0.0003*** KO Baseline vs. LC p=0.9960
Figure 7B	slice electrophysiology	Number of spikes	M	>12wks	WT = 24 neurons/3 mice WT+mem=18 neurons/3 mice	WT 0pA = 0.000 ± 0.000 WT 50pA = 0.04167 ± 0.04167 WT 100pA = 0.1250 ± 0.09153 WT 150pA = 1.125 ± 0.3577 WT 200pA = 2.792 ± 0.6312 WT 250pA = 4.625 ± 0.8572 WT 300pA = 6.833 ± 0.9162 WT 350pA = 8.917 ± 0.9458 WT 400pA = 10.46 ± 0.7962 WT+mem 0pA = 0.000 ± 0.000 WT+mem 50pA = 0.000 ± 0.000 WT+mem 100pA = 0.8235 ± 0.3951 WT+mem 150pA = 2.647 ± 0.6414 WT+mem 200pA = 4.118 ± 0.9070 WT+mem 250pA = 5.7…	WT 0pA = 0.000 (0.000, 0.000) WT 50pA = 0.000 (0.000, 0.000) WT 100pA = 0.000 (0.000, 0.000) WT 150pA = 0.000 (0.000, 2.000) WT 200pA = 2.000 (0.000, 5.000) WT 250pA = 4.000 (1.000, 7.750) WT 300pA = 6.500 (4.000, 9.750) WT 350pA = 8.500 (6.000, 11.00) WT 400pA = 10.50 (8.250, 13.00) WT+mem 0pA = 0.000 (0.000, 0.000) WT+mem 50pA = 0.000 (0.000, 0.000) WT+mem 100pA = 0.000 (0.000, 1.500) WT+mem 15…	Repeated measures of Two-Way ANOVA	Interaction p=0.0913 Current p<0.0001*** Drug p=0.6270
Figure 7C	slice electrophysiology	Number of spikes	M	>12wks	KO = 23 neurons/3 mice KO+mem = 17 neurons/3 mice	KO 0pA = 0.000 ± 0.000 KO 50pA = 0.000 ± 0.000 KO 100pA = 0.1739 ± 0.1201 KO 150pA = 1.217 ± 0.4072 KO 200pA = 2.913 ± 0.6253 KO 250pA = 4.870 ± 0.7604 KO 300pA = 6.696 ± 0.8515 KO 350pA = 8.478 ± 0.9129 KO 400pA = 10.61 ± 0.9061 KO+mem 0pA = 0.000 ± 0.000 KO+mem 50pA = 0.2941 ± 0.2941 KO+mem 100pA = 1.176 ± 0.6256 KO+mem 150pA = 2.941 ± 0.9134 KO+mem 200pA = 4.882 ± 1.140 KO+mem 250pA = 7.000 ± …	KO 0pA = 0.000 (0.000, 0.000) KO 50pA = 0.000 (0.000, 0.000) KO 100pA = 0.000 (0.000, 0.000) KO 150pA = 0.000 (0.000, 2.000) KO 200pA = 1.000 (0.000, 6.000) KO 250pA = 5.000 (1.000, 8.000) KO 300pA = 7.000 (3.000, 10.00) KO 350pA = 9.000 (6.000, 12.00) KO 400pA = 11.00 (7.000, 14.00) KO+mem 0pA = 0.000 (0.000, 0.000) KO+mem 50pA = 0.000 (0.000, 0.000) KO+mem 100pA = 0.000 (0.000, 1.500) KO+mem 15…	Repeated measures of Two-Way ANOVA	Interaction p=0.0913 Current p<0.0001*** Drug p=0.6270
Figure 7E	slice electrophysiology	Burst proportion (%)	M	>12wks	WT = 24 neurons/3 mice WT+mem=18 neurons/3 mice	WT 50pA = 0.000 ± 0.000 WT 100pA = 0.000 ± 0.000 WT 150pA = 11.11 ± 7.349 WT 200pA = 6.327 ± 3.521 WT 250pA = 8.426 ± 5.401 WT 300pA = 8.799 ± 2.826 WT 350pA = 14.43 ± 4.369 WT 400pA = 13.29 ± 2.440 WT+mem 100pA = 0.000 ± 0.000 WT+mem 150pA = 0.000 ± 0.000 WT+mem 200pA = 0.000 ± 0.000 WT+mem 250pA = 0.000 ± 0.000 WT+mem 300pA = 0.000 ± 0.000 WT+mem 350pA = 1.176 ± 1.176 WT+mem 400pA = 4.337 ± 1.9…	WT 50pA = 0.000 (0.000, 0.000) WT 100pA = 0.000 (0.000, 0.000) WT 150pA = 0.000 (0.000, 25.00) WT 200pA = 0.000 (0.000, 5.000) WT 250pA = 0.000 (0.000, 0.000) WT 300pA = 0.000 (0.000, 17.50) WT 350pA = 13.96 (0.000, 23.30) WT 400pA = 15.19 (0.000, 20.00) WT+mem 100pA = 0.000 (0.000, 0.000) WT+mem 150pA = 0.000 (0.000, 0.000) WT+mem 200pA = 0.000 (0.000, 0.000) WT+mem 250pA = 0.000 (0.000, 0.000) …	Mixed-effects ANOVA	Current p=0.4331 Drug p=0.0098**
Figure 7G	slice electrophysiology	Burst proportion (%)	M	>12wks	KO = 23 neurons/3 mice KO+mem = 17 neurons/3 mice	KO 100pA = 0.000 ± 0.000 KO 150pA = 0.000 ± 0.000 KO 200pA = 1.563 ± 1.563 KO 250pA = 2.556 ± 1.787 KO 300pA = 2.804 ± 1.548 KO 350pA = 9.910 ± 4.624 KO 400pA = 7.373 ± 1.991 KO+mem 0pA = 0.000 ± 0.000 KO+mem 50pA = 0.000 ± 0.000 KO+mem 100pA = 0.000 ± 0.000 KO+mem 150pA = 0.000 ± 0.000 KO+mem 200pA = 15.03 ± 7.559 KO+mem 250pA = 15.27 ± 7.331 KO+mem 300pA = 15.98 ± 6.407 KO+mem 350pA = 11.64 ± 3…	KO 100pA = 0.000 (0.000, 0.000) KO 150pA = 0.000 (0.000, 0.000) KO 200pA = 0.000 (0.000, 0.000) KO 250pA = 0.000 (0.000, 0.000) KO 300pA = 0.000 (0.000, 0.000) KO 350pA = 0.000 (0.000, 16.67) KO 400pA = 0.000 (0.000, 14.29) KO+mem 0pA = 0.000 (0.000, 0.000) KO+mem 50pA = 0.000 (0.000, 0.000) KO+mem 100pA = 0.000 (0.000, 0.000) KO+mem 150pA = 0.000 (0.000, 0.000) KO+mem 200pA = 0.000 (0.000, 11.11…	Mixed-effects ANOVA	Current p=0.5603 Drug p=0.0304*
Figure 1-supplementary 2A	in vivo recording	In-zone duration (s)	M	>12wks	WT = 6 mice KO = 8 mice	WT L = 224.9 ± 18.15 WT R = 276 ± 20.13 KO L = 267.6 ± 21.53 KO R = 230.8 ± 19.92	WT L = 234.8 (194.7, 258.3) WT R = 266.8 (232.8, 316.1) KO L = 263.5 (206.6, 315.9) KO R = 221.7 (188.3, 270.1)	Repeated measures of Two-Way ANOVA	Interaction p=0.1508 Sideness p=0.8068 Genotype p=0.8238
Figure 1-supplementary 2B	in vivo recording	In-zone duration (s)	M	>12wks	WT = 6 mice KO = 8 mice	WT S = 323.6 ± 13.47 WT O = 198.5 ± 10.95 KO S = 239.8 ± 13.04 KO O = 259.8 ± 15.68	WT S = 323.6 (289, 350.9) WT O = 206.8 (170.8, 221.6) KO S = 238 (209, 273.5) KO O = 266.2 (225.8, 302.4)	Repeated measures of Two-Way ANOVA with Sidak's multiple comparisons test	Interaction p=0.0015 ** Target p=0.0117 * Genotype p=0.2336	WT S vs. O p=0.0011 ** KO S vs. O p=0.6463 S WT vs. KO p=0.0006 *** O WT vs. KO p=0.0099 **
Figure 1-supplementary 2C	in vivo recording	In-zone duration (s)	M	>12wks	WT = 6 mice KO = 8 mice	WT S = 240.4 ± 25.02 WT O = 269.2 ± 32.04 KO S = 261.4 ± 15.75 KO O = 258.3 ± 17.12	WT S = 249.7 (206.1, 281) WT O = 246.5 (217.1, 324.5) KO S = 257.9 (216.3, 304.6) KO O = 247.4 (221.2, 305.8)	Repeated measures of Two-Way ANOVA	Interaction p=0.6041 Target p=0.6758 Genotype p=0.5758
Figure 1-supplementary 2D	in vivo recording	# of sniffing trials / session	M	>12wks	WT = 57 experiments KO = 69 experiments	WT L = 14.46 ± 0.7133 WT R = 15.67 ± 0.6947 WT FS = 14.02 ± 0.7582 WT FO = 11.04 ± 0.7459 WT SS = 13.18 ± 0.8994 WT SO = 12.05 ± 0.7218 KO L = 14.03 ± 0.7430 KO R = 13.54 ± 0.6790 KO FS = 9.623 ± 0.6623 KO FO = 9.623 ± 0.5673 KO SS = 10.01 ± 0.6095 KO SO = 8.145 ± 0.5191	WT L = 15 (10, 18) WT R = 16 (13, 20) WT FS = 15 (10, 17.5) WT FO = 11 (7, 14.5) WT SS = 13 (8, 19) WT SO = 12 (7.5, 16) KO L = 13 (10, 18) KO R = 14 (10, 17) KO FS = 8 (6, 14) KO FO = 9 (6.5, 12.5) KO SS = 10 (6.5, 13) KO SO = 7 (5, 11.5)	Repeated measures of Two-Way ANOVA with Sidak's multiple comparisons test	Interaction p=0.0024 ** Target p<0.0001 **** Genotype p=0.0002 ***	WT - KO L p=0.9989 R p=0.1680 First S p=0.0002 *** First O p=0.5805 Second S p=0.0264 * Second O p=0.0002 ***
Figure 1-supplementary 2E	in vivo recording	Mean duration / trial (s)	M	>12wks	WT = 57 experiments KO = 69 experiments	WT L = 8.868 ± 0.5959 WT R = 9.469 ± 0.5473 WT FS = 13.62 ± 1.518 WT FO = 11.09 ± 1.447 WT SS = 8.427 ± 0.5738 WT SO = 10.78 ± 1.032 KO L = 8.538 ± 0.5889 KO R = 7.882 ± 0.3581 KO FS = 13.44 ± 1.245 KO FO = 13.22 ± 2.589 KO SS = 10.82 ± 0.9289 KO SO = 9.020 ± 0.7887	WT L = 8.041 (6.468, 9.788) WT R = 8.567 (6.952, 11.23) WT FS = 10.66 (6.973, 15.61) WT FO = 8.664 (6.538, 11.98) WT SS = 7.697 (5.688, 10.02) WT SO = 8.244 (6.315, 10.63) KO L = 7.439 (5.836, 10.28) KO R = 7.543 (6, 8.968) KO FS = 11 (6.321, 16.14) KO FO = 7.608 (5.185, 11.49) KO SS = 8.268 (5.743, 12.45) KO SO = 7.848 (5.105, 10.08)	Repeated measures of Two-Way ANOVA	Interaction p=0.2974 Target p<0.0001 **** Genotype p=0.8996 ns
Figure 1-supplementary 2F	in vivo recording	Distance moved (cm)	M	>12wks	WT = 6 mice KO = 8 mice	WT EE = 1527 ± 182.2 WT FSO = 1134 ± 112.9 WT SSO = 1092 ± 127.4 KO EE = 1639 ± 219.8 KO FSO = 1237 ± 239.4 KO SSO = 1066 ± 197.5	WT EE = 1507 (1115, 1903) WT FSO = 1076 (908.8, 1357) WT SSO = 1096 (808.9, 1355) KO EE = 1603 (1165, 2073) KO FSO = 1097 (611.5, 1990) KO SSO = 853.4 (701.3, 1550)	Repeated measures of Two-Way ANOVA with Sidak's multiple comparisons test	Interaction p=0.5510 Session p<0.0001**** Genotype p=0.8201
Figure 1-supplementary 2G	in vivo recording	Distance moved (cm)	M	>12wks	WT = 6 mice KO = 8 mice	WT Trial 1 = 2898 ± 380 WT Trial 5 = 4010 ± 388.5 WT Trial 10 = 4349 ± 672.6 KO Trial 1 = 4207 ± 1409 KO Trial 5 = 3308 ± 361 KO Trial 10 = 4312 ± 769.2	WT Trial 1 = 2544 (2166, 3771) WT Trial 5 = 4090 (3315, 4750) WT Trial 10 = 4026 (2871, 6255) KO Trial 1 = 2732 (1623, 5819) KO Trial 5 = 3278 (2299, 4184) KO Trial 10 = 3809 (3029, 6443)	Repeated measures of Two-Way ANOVA	Interaction p=0.4042 Trial p=0.5371 Genotype p=0.8201
Figure 3-supplementary 1C	in vivo recording	Neuron proportion (%)	M	>12wks	WT = 232 neurons/6 mice KO = 234 neurons/8 mice	WT total E neuron = 114 WT other neuron = 118 KO total E neuron = 111 KO other neuron = 123		Fisher's exact test	p=0.7810	ns
Figure 3-supplementary 2A	in vivo recording	Social z-score	M	>12wks	WT = 233 neurons/6 mice KO = 258 neurons/8 mice	Best-fit values ± Std. error WT Slope = 0.7719 ± 0.05564 WT Y-intercept = 0.03760 ± 0.03687 KO Slope = 0.4991 ± 0.04776 KO Y-intercept = 0.02311 ± 0.02893		Simple linear regression	WT vs. KO slope p=0.0002*** WT R squared = 0.4545 KO R squared = 0.2990 WT slope significantly non-zero p<0.0001*** KO slope significantly non-zero p<0.0001***
Figure 3-supplementary 2B	in vivo recording	Object z-score	M	>12wks	WT = 233 neurons/6 mice KO = 258 neurons/8 mice	Best-fit values ± Std. error WT Slope = 0.7378 ± 0.05397 WT Y-intercept = 0.01780 ± 0.03348 KO Slope = 0.4516 ± 0.05440 KO Y-intercept = -0.003383 ± 0.03203		Simple linear regression	WT vs. KO slope p=0.0002*** WT R squared = 0.4472 KO R squared = 0.2121 WT slope significantly non-zero p<0.0001*** KO slope significantly non-zero p<0.0001***
Figure 3-supplementary 2C	in vivo recording	Left z-score	M	>12wks	WT = 233 neurons/6 mice KO = 258 neurons/8 mice	Best-fit values ± Std. error WT Slope = 0.6057 ± 0.07369 WT Y-intercept = 0.05361 ± 0.05032 KO Slope = 0.4710 ± 0.04791 KO Y-intercept = 0.01746 ± 0.02825		Simple linear regression	WT vs. KO slope p=0.1300 intercept p=0.4580 WT R squared = 0.2263 KO R squared = 0.2741 WT slope significantly non-zero p<0.0001*** KO slope significantly non-zero p<0.0001***
Figure 3-supplementary 2D	in vivo recording	Right z-score	M	>12wks	WT = 233 neurons/6 mice KO = 258 neurons/8 mice	Best-fit values ± Std. error WT Slope = 0.5156 ± 0.04835 WT Y-intercept = 0.01096 ± 0.02891 KO Slope = 0.4278 ± 0.05585 KO Y-intercept = 0.05943 ± 0.03378		Simple linear regression	WT vs. KO slope p=0.2398 intercept p=0.8481 WT R squared = 0.3300 KO R squared = 0.1865 WT slope significantly non-zero p<0.0001*** KO slope significantly non-zero p<0.0001***
Figure 3-supplementary 2E	in vivo recording	|Social z-score|	M	>12wks	WT = 198 neurons/6 mice KO = 214 neurons/8 mice	WT proximal = 0.4795 ± 0.03627 WT distal = 0.3566 ± 0.02657 KO proximal = 0.4428 ± 0.02890 KO distal = 0.3541 ± 0.02416	WT proximal = 0.3427 (0.1773, 0.6492) WT distal = 0.2733 (0.1212, 0.4777) KO proximal = 0.3225 (0.1581, 0.6385) KO distal = 0.2606 (0.1387, 0.4626)	Repeated measures of Two-Way ANOVA with Sidak's multiple comparisons test	Interaction p=0.3225 Proximity p<0.0001 *** Genotype p=0.6012
Figure 3-supplementary 2F	in vivo recording	|Object z-score|	M	>12wks	WT = 198 neurons/6 mice KO = 214 neurons/8 mice	WT proximal = 0.4822 ± 0.04174 WT distal = 0.3165 ± 0.02407 KO proximal = 0.4673 ± 0.03000 KO distal = 0.3223 ± 0.02520	WT proximal = 0.3411 (0.1188, 0.5886) WT distal = 0.2323 (0.08608, 0.4376) KO proximal = 0.3688 (0.1867, 0.5962) KO distal = 0.2384 (0.09046, 0.4322)	Repeated measures of Two-Way ANOVA with Sidak's multiple comparisons test	Interaction p=0.6704 Proximity p<0.0001 *** Genotype p=0.9007
Figure 3-supplementary 2H	in vivo recording	Consistency (%)	M	>12wks	WT = 99 neurons/6 mice KO = 72 neurons/8 mice	WT = 81.92 ± 1.631 KO = 83.02 ± 1.759	WT = 85.71 (76.00, 94.44) KO = 86.52 (76.47, 93.92)	Mann-Whitney, two-tailed One sample t test	WT vs. KO p=0.8020 WT p<0.0001### KO p<0.0001###
Figure 3-supplementary 2I	in vivo recording	Consistency (%)	M	>12wks	WT = 86 neurons/6 mice KO = 83 neurons/8 mice	WT = 81.31 ± 1.725 KO = 80.08 ± 1.877	WT = 84.09 (70.28, 94.20) KO = 82.35 (69.23, 94.44)	Mann-Whitney, two-tailed One sample t test	WT vs. KO p=0.7136 WT p<0.0001### KO p<0.0001###
Figure 4-supplementary 1A	in vivo recording	Firing rate (Hz) vs. Firing rate (Hz)	M	>12wks	WT = 233 neurons/6 mice KO = 258 neurons/8 mice	WT Slope = 0.9790 ± 0.01749 WT Y-intercept = 0.05867 ± 0.08612 KO Slope = 0.9718 ± 0.01484 KO Y-intercept = 0.01457 ± 0.07734		Simple linear regression	WT vs. KO slope p=0.0024**
Figure 4-supplementary 1B	in vivo recording	Decoding accuracy (%)	M	>12wks	WT = 63 neurons/6 mice KO = 49 neurons/8 mice	WT = 64.46 ± 0.9624 KO = 64.82 ± 0.8568	WT = 63.00 (58.25, 67.80) KO = 63.60 (60.10, 69.55)	Mann-Whitney, two-tailed	p=0.5257	ns
Figure 4-supplementary 1C	in vivo recording	Decoding accuracy (%)	M	>12wks	WT = 63 neurons/6 mice KO = 31 neurons/8 mice	WT = 70.15 ± 1.203 KO = 64.44 ± 1.153	WT = 70.90 (61.15, 75.55) KO = 63.50 (59.20, 68.30)	Unpaired t test, two-tailed	p=0.0034	**
Figure 4-supplementary 1D	in vivo recording	Decoding accuracy (%)	M	>12wks	WT = 43 neurons/6 mice KO = 30 neurons/8 mice	WT = 67.08 ± 0.01641 KO = 65.16 ± 0.01670	WT = 63.45 (59.50, 73.00) KO = 61.90 (59.58, 68.65)	Mann-Whitney, two-tailed	p=0.4300	ns
Figure 4-supplementary 1E	in vivo recording	Decoding accuracy (%)	M	>12wks	WT = 100 trials/67 neurons/6 mice KO = 100 trials/67 neurons/8 mice	WT = 97.80 ± 0.4784 KO = 94.90 ± 0.5550	WT = 100.0 (95.00, 100.0) KO = 95.00 (90.00, 100.0)	Mann-Whitney, two-tailed	p<0.0001	***
Figure 4-supplementary 2A	in vivo recording	Decoding accuracy (%)	M	>12wks	WT = 100 trials/74 neurons/6 mice KO = 100 trials/74 neurons/8 mice	WT = 99.20 ± 0.2433 KO = 97.75 ± 0.3208	WT = 100.0 (100.0, 100.0) KO = 100.0 (95.00, 100.0)	Mann-Whitney, two-tailed	p<0.0001	***
Figure 4-supplementary 2B	in vivo recording	Decoding accuracy (%)	M	>12wks	WT = 100 trials/74 neurons/6 mice KO = 100 trials/74 neurons/8 mice	WT = 93.60 ± 0.6117 KO = 87.25 ± 0.9438	WT = 95.00 (90.00, 100.0) KO = 90.00 (80.00, 95.00)	Mann-Whitney, two-tailed	p<0.0001	***
Figure 4-supplementary 2C	in vivo recording	Decoding accuracy (%)	M	>12wks	WT = 100 trials/48 neurons/6 mice KO = 100 trials/48 neurons/8 mice	WT = 93.10 ± 0.7170 KO = 84.45 ± 0.8193	WT = 90.00 (70.00, 95.0) KO = 80.00 (60.00, 85.0)	Mann-Whitney, two-tailed	p<0.0001	***
Figure 4-supplementary 2D	in vivo recording	Decoding accuracy (%)	M	>12wks	WT = 100 trials/48 neurons/6 mice KO = 100 trials/48 neurons/8 mice	WT = 76.15 ± 1.383 KO = 73.30 ± 1.362	WT = 80.00 (70.00, 85.00) KO = 75.00 (65.00, 80.00)	Mann-Whitney, two-tailed	p=0.1362	ns
Figure 5-supplementary 1A	in vivo recording	Minimum firing rate (Hz)	M	>12wks	WT = 233 neurons/6 mice KO = 258 neurons/8 mice	WT = 0.1252 ± 0.04106 KO = 0.2817 ± 0.08764	WT = 0 (0, 0) KO = 0 (0, 0)	Mann-Whitney, two-tailed	p=0.0544	ns
Figure 5-supplementary 1B	in vivo recording	Maximum firing rate (Hz)	M	>12wks	WT = 233 neurons/6 mice KO = 258 neurons/8 mice	WT = 13.93 ± 0.4588 KO = 12.23 ± 0.4202	WT = 12 (8.333, 18.00) KO = 10.67 (7.000, 15.42)	Mann-Whitney, two-tailed	p=0.0024	**
Figure 5-supplementary 1C	in vivo recording	Firing rate range (Hz)	M	>12wks	WT = 233 neurons/6 mice KO = 258 neurons/8 mice	WT E-E = 11.09 ± 0.4100 WT fS-O = 11.93 ± 0.4215 WT sS-O = 11.74 ± 0.4175 KO E-E = 9.783 ± 0.3363 KO fS-O = 10.11 ± 0.3430 KO sS-O = 10.10 ± 0.3379	WT E-E = 9.667 (6.000, 15.17) WT fS-O = 10.33 (7.000, 16.67) WT sS-O = 10.33 (6.667, 15.67) KO E-E = 8.667 (5.333, 12.08) KO fS-O = 9.000 (5.667, 13.33) KO sS-O = 9.000 (5.917, 13.33)	Friedman test with Dunn's multiple comparisons test	WT p=0.0034** KO p=0.5894	WT E-E vs. fS-O p=0.0045** WT E-E vs. sS-O p=0.0511 WT fS-O vs. sS-O p>0.9999
Figure 5-supplementary 1D	in vivo recording	Firing rate range (Hz)	M	>12wks	WT = 233 neurons/6 mice KO = 258 neurons/8 mice	WT = 8.325 ± 0.3404 KO = 8.097 ± 0.3127	WT = 7.333 (4.333, 11.67) KO = 7.000 (4.333, 10.33)	Mann-Whitney, two-tailed	p=0.5748	ns
Figure 5-supplementary 1E	in vivo recording	Firing rate range (Hz)	M	>12wks	WT = 233 neurons/6 mice KO = 258 neurons/8 mice	WT = 11.09 ± 0.4100 KO = 9.783 ± 0.3363	WT = 9.667 (6.000, 5.333) KO = 8.667 (15.17, 12.08)	Mann-Whitney, two-tailed	p=0.0283	*
Figure 5-supplementary 1F	in vivo recording	Firing rate range (Hz)	M	>12wks	WT = 233 neurons/6 mice KO = 258 neurons/8 mice	WT = 11.93 ± 0.4215 KO = 10.11 ± 0.3430	WT = 10.33 (7.000, 16.67) KO = 9.000 (5.667, 13.33)	Mann-Whitney, two-tailed	p=0.0016	**
Figure 5-supplementary 1G	in vivo recording	Firing rate range (Hz)	M	>12wks	WT = 233 neurons/6 mice KO = 258 neurons/8 mice	WT = 11.74 ± 0.4175 KO = 10.10 ± 0.3379	WT = 10.33 (6.667, 15.67) KO = 9.000 (5.917, 13.33)	Mann-Whitney, two-tailed	p=0.0040	**
Figure 5-supplementary 1H	in vivo recording	Sigma (Hz)	M	>12wks	WT = 233 neurons/6 mice KO = 258 neurons/8 mice	WT 0.25 ms = 4.059 ± 0.1310 WT 0.5 ms = 3.393 ± 0.1142 WT 1 ms = 2.896 ± 0.1019 WT 2 ms = 2.493 ± 0.09184 WT 3 ms = 2.287 ± 0.08616 WT 4 ms = 2.155 ± 0.08256 WT 5 ms = 2.052 ± 0.07965 KO 0.25 ms = 3.845 ± 0.1087 KO 0.5 ms = 3.106 ± 0.09168 KO 1 ms = 2.584 ± 0.08005 KO 2 ms = 2.189 ± 0.07149 KO 3 ms = 2.001 ± 0.06760 KO 4 ms = 1.889 ± 0.06536 KO 5 ms = 1.804 ± 0.06366	WT 0.25 ms = 3.531 (2.378, 5.139) WT 0.5 ms = 2.983 (1.937, 4.525) WT 1 ms = 2.561 (1.625, 3.870) WT 2 ms = 2.215 (1.354, 3.284) WT 3 ms = 2.029 (1.237, 2.971) WT 4 ms = 1.908 (1.158, 2.827) WT 5 ms = 1.841 (1.096, 2.681) KO 0.25 ms = 3.524 (2.438, 4.713) KO 0.5 ms = 2.829 (1.891, 3.943) KO 1 ms = 2.333 (1.531, 3.367) KO 2 ms = 1.957 (1.278, 2.891) KO 3 ms = 1.796 (1.166, 2.649) KO 4 ms = 1.679 (…	Repeated measures of Two-Way ANOVA	Interaction p=0.3993 Timebin p<0.0001**** Genotype p=0.0262*
Figure 5-supplementary 1I	in vivo recording	Sigma (Hz)	M	>12wks	WT = 233 neurons/6 mice KO = 258 neurons/8 mice	WT = 1.563 ± 0.06557 KO = 1.543 ± 0.05932	WT = 1.416 (0.7296, 2.181) KO = 1.371 (0.8404, 2.094)	Mann-Whitney, two-tailed	p=0.9155	ns
Figure 5-supplementary 1J	in vivo recording	Sigma (Hz)	M	>12wks	WT = 233 neurons/6 mice KO = 258 neurons/8 mice	WT = 2.013 ± 0.08360 KO = 1.761 ± 0.06118	WT = 1.748 (0.9385, 2.697) KO = 1.500 (1.032, 2.314)	Mann-Whitney, two-tailed	p=0.1141	ns
Figure 5-supplementary 1K	in vivo recording	Sigma (Hz)	M	>12wks	WT = 233 neurons/6 mice KO = 258 neurons/8 mice	WT = 2.176 ± 0.08469 KO = 1.857 ± 0.06532	WT = 1.862 (1.192, 2.860) KO = 1.658 (1.075, 2.385)	Mann-Whitney, two-tailed	p=0.0098	**
Figure 5-supplementary 1L	in vivo recording	Sigma (Hz)	M	>12wks	WT = 233 neurons/6 mice KO = 258 neurons/8 mice	WT = 2.100 ± 0.08092 KO = 1.829 ± 0.06231	WT = 1.848 (1.106, 2.777) KO = 1.620 (1.009, 2.386)	Mann-Whitney, two-tailed	p=0.0278	*
Figure 5-supplementary 1M	in vivo recording	Mean firing rate (Hz)	M	>12wks	WT = 233 neurons/6 mice KO = 258 neurons/8 mice	WT E-E = 3.218 ± 0.2338 WT fS-O = 3.207 ± 0.2204 WT sS-O = 3.226 ± 0.2330 KO E-E = 3.352 ± 0.2332 KO fS-O = 3.536 ± 0.2446 KO sS-O = 3.417 ± 0.2276	WT E-E = 1.869 (0.6978, 4.478) WT fS-O = 1.840 (0.9482, 4.266) WT sS-O = 1.813 (0.9079, 4.158) KO E-E = 2.057 (1.033, 4.365) KO fS-O = 2.145 (1.107, 4.681) KO sS-O = 2.109 (1.180, 4.755)	Friedman test	WT p=0.6291 KO p=0.9884
Figure 5-supplementary 2B	in vivo recording	Maximum Δfiring rate (Hz)	M	>12wks	WT = 233 neurons/6 mice KO = 258 neurons/8 mice	WT = 1.178 ± 0.07593 KO = 1.015 ± 0.05856	WT = 0.7641 (0.3687, 1.492) KO = 0.6448 (0.3756, 1.307)	Mann-Whitney, two-tailed	p=0.2635	ns
Figure 5-supplementary 2C	in vivo recording	Maximum Δfiring rate (Hz)	M	>12wks	WT = 233 neurons/6 mice KO = 258 neurons/8 mice	WT = 1.680 ± 0.1118 KO = 1.330 ± 0.07210	WT = 1.134 (0.6026, 2.215) KO = 1.009 (0.4972, 1.720)	Mann-Whitney, two-tailed	p=0.0322	*
Figure 5-supplementary 2D	in vivo recording	Maximum Δfiring rate (Hz)	M	>12wks	WT = 233 neurons/6 mice KO = 258 neurons/8 mice	WT = 1.770 ± 0.1141 KO = 1.531 ± 0.09390	WT = 1.288 (0.5926, 2.549) KO = 1.067 (0.5298, 2.024)	Mann-Whitney, two-tailed	p=0.1012	ns
Figure 5-supplementary 2E	in vivo recording	Normalized maximum Δfiring rate	M	>12wks	WT = 233 neurons/6 mice KO = 258 neurons/8 mice	WT E-E = 0.2791 ± 0.01356 WT fS-O = 0.3589 ± 0.01526 WT sS-O = 0.3305 ± 0.01577 KO E-E = 0.2181 ± 0.009987 KO fS-O = 0.2867 ± 0.01327 KO sS-O = 0.2883 ± 0.01445	WT E-E = 0.2281 (0.1283, 0.3758) WT fS-O = 0.3296 (0.1828, 0.4557) WT sS-O = 0.2717 (0.1495, 0.4393) KO E-E = 0.1743 (0.1005, 0.3018) KO fS-O = 0.2414 (0.1319, 0.3881) KO sS-O = 0.2121 (0.1161, 0.4352)	Repeated measures of Two-Way ANOVA	Interaction p=0.3808 Session p<0.0001*** Genotype p<0.0001***
Figure 6-supplementary 1A	in vivo recording	Burst proportion (%)	M	>12wks	WT = 233 neurons/6 mice KO = 257 neurons/8 mice	WT 5ms = 1.521 ± 0.3535 WT 10ms = 6.054 ± 0.6385 WT 15ms = 10.42 ± 0.7849 WT 20ms = 13.99 ± 0.8901 WT 25ms = 16.98 ± 0.9887 WT 30ms = 19.92 ± 1.074 KO 5ms = 1.000 ± 0.1393 KO 10ms = 4.525 ± 0.3813 KO 15ms = 8.665 ± 0.5191 KO 20ms = 12.41 ± 0.6415 KO 25ms = 15.98 ± 0.7575 KO 30ms = 18.99 ± 0.8619	WT 5ms = 0.1698 (0.000, 1.067) WT 10ms = 3.274 (1.146, 7.070) WT 15ms = 7.261 (3.359, 13.14) WT 20ms = 10.70 (5.708, 18.62) WT 25ms = 13.29 (7.312, 22.50) WT 30ms = 16.95 (8.656, 27.37) KO 5ms = 0.2171 (0.000, 1.144) KO 10ms = 2.991 (0.7433, 6.048) KO 15ms = 6.777 (2.857, 11.59) KO 20ms = 10.45 (4.853, 17.14) KO 25ms = 14.20 (6.953, 21.83) KO 30ms = 17.41 (8.662, 26.64)	Repeated measures of Two-Way ANOVA	Interaction p=0.4895 Burst criteria p<0.0001*** Genotype p=0.1738
Figure 6-supplementary 1B	in vivo recording	Burst proportion (%)	M	>12wks	WT = 233 neurons/6 mice KO = 258 neurons/8 mice	WT 5ms = 1.551 ± 0.3189 WT 10ms = 6.314 ± 0.5728 WT 15ms = 11.55 ± 0.7120 WT 20ms = 15.98 ± 0.8134 WT 25ms = 19.79 ± 0.8975 WT 30ms = 23.10 ± 0.9754 KO 5ms = 0.9602 ± 0.1205 KO 10ms = 4.126 ± 0.3227 KO 15ms = 8.344 ± 0.4997 KO 20ms = 12.28 ± 0.6381 KO 25ms = 15.81 ± 0.7611 KO 30ms = 19.09 ± 0.8652	WT 5ms = 0.4692 (0.000, 1.315) WT 10ms = 3.953 (1.604, 7.557) WT 15ms = 9.057 (4.843, 15.11) WT 20ms = 12.80 (7.312, 20.74) WT 25ms = 16.29 (10.43, 26.40) WT 30ms = 20.34 (12.63, 30.94) KO 5ms = 0.2855 (0.000, 1.073) KO 10ms = 2.769 (1.034, 5.107) KO 15ms = 6.518 (3.065, 10.74) KO 20ms = 10.42 (4.855, 15.94) KO 25ms = 14.15 (6.864, 20.56) KO 30ms = 17.14 (9.004, 24.07)	Repeated measures of Two-Way ANOVA with Sidak's multiple comparisons test	Interaction p<0.0001*** Burst criteria p<0.0001*** Genotype p=0.0005***	WT vs. KO 5 p=0.4093 10 p=0.0058** 15 p=0.0015** 20 p=0.0022** 25 p=0.0047** 30 p=0.0132*
Figure 6-supplementary 1C	in vivo recording	Burst proportion (%)	M	>12wks	WT = 233 neurons/6 mice KO = 257 neurons/8 mice	WT 5ms = 1.508 ± 0.3233 WT 10ms = 6.103 ± 0.5762 WT 15ms = 11.00 ± 0.7096 WT 20ms = 15.22 ± 0.8147 WT 25ms = 18.88 ± 0.9083 WT 30ms = 22.09 ± 0.9980 KO 5ms = 0.8490 ± 0.1102 KO 10ms = 3.753 ± 0.3062 KO 15ms = 7.668 ± 0.4754 KO 20ms = 11.41 ± 0.6063 KO 25ms = 14.83 ± 0.7286 KO 30ms = 17.90 ± 0.8362	WT 5ms = 0.3810 (0.000, 1.061) WT 10ms = 3.774 (1.693, 7.167) WT 15ms = 8.338 (4.613, 13.70) WT 20ms = 12.24 (7.208, 19.63) WT 25ms = 15.54 (9.459, 24.52) WT 30ms = 18.15 (10.88, 28.78) KO 5ms = 0.2620 (0.000, 0.8630) KO 10ms = 2.176 (0.9027, 4.969) KO 15ms = 5.794 (2.572, 11.02) KO 20ms = 9.173 (4.446, 15.67) KO 25ms = 12.43 (6.603, 19.58) KO 30ms = 15.20 (8.516, 22.95)	Repeated measures of Two-Way ANOVA	Interaction p<0.0001*** Burst criteria p<0.0001*** Genotype p=0.0002***	WT vs. KO 5 p=0.2864 10 p=0.0022** 15 p=0.0007*** 20 p=0.0012** 25 p=0.0033** 30 p=0.0083**
Figure 6-supplementary 1D	in vivo recording	Burst proportion (%)	M	>12wks	WT = 233 neurons/6 mice KO = 258 neurons/8 mice	WT 5ms = 1.551 ± 0.3189 WT 10ms =6.314 ± 0.5728 WT 15ms = 11.55 ± 0.7120 WT 20ms = 15.98 ± 0.8134 WT 25ms = 19.79 ± 0.8975 WT 30ms = 23.10 ± 0.9754 KO 5ms = 0.9602 ± 0.1205 KO 10ms = 4.126 ± 0.3227 KO 15ms = 8.344 ± 0.4997 KO 20ms = 12.28 ± 0.6381 KO 25ms = 15.81 ± 0.7611 KO 30ms = 19.09 ± 0.8652	WT 5ms = 0.4692 (0.000, 1.315) WT 10ms = 3.953 (1.604, 7.557) WT 15ms = 9.057 (4.843, 15.11) WT 20ms = 12.80 (7.312, 20.74) WT 25ms = 16.29 (10.43, 26.40) WT 30ms = 20.34 (12.63, 30.94) KO 5ms = 0.2855 (0.000, 1.073) KO 10ms = 2.769 (1.034, 5.107) KO 15ms = 6.518 (3.065, 10.74) KO 20ms = 10.42 (4.855, 15.94) KO 25ms = 14.15 (6.864, 20.56) KO 30ms = 17.14 (9.004, 24.07)	Repeated measures of Two-Way ANOVA with Sidak's multiple comparisons test	Interaction p<0.0001*** Burst criteria p<0.0001*** Genotype p=0.0005***	WT vs. KO 5 p=0.4093 10 p=0.0058** 15 p=0.0015** 20 p=0.0022** 25 p=0.0047** 30 p=0.0132*
Figure 6-supplementary 1E	in vivo recording	Burst proportion (%)	M	>12wks	WT = 233 neurons/6 mice KO = 258 neurons/8 mice	WT 5ms = 1.534 ± 0.3219 WT 10ms = 6.346 ± 0.5726 WT 15ms = 11.49 ± 0.7140 WT 20ms = 15.83 ± 0.8195 WT 25ms = 19.58 ± 0.9085 WT 30ms = 22.81 ± 0.9856 KO 5ms = 1.002 ± 0.1257 KO 10ms = 4.202 ± 0.3009 KO 15ms = 8.406 ± 0.4675 KO 20ms = 12.38 ± 0.6072 KO 25ms = 16.00 ± 0.7190 KO 30ms = 19.17 ± 0.8169	WT 5ms = 0.4332 (0.000, 1.117) WT 10ms = 3.852 (2.030, 7.680) WT 15ms = 8.342 (4.916, 14.37) WT 20ms = 12.59 (7.793, 20.20) WT 25ms = 16.25 (10.24, 24.72) WT 30ms = 19.36 (12.51, 28.52) KO 5ms = 0.2949 (0.000, 1.129) KO 10ms = 2.680 (1.121, 5.562) KO 15ms = 6.655 (3.379, 10.82) KO 20ms = 10.52 (5.934, 15.44) KO 25ms = 13.93 (8.233, 20.81) KO 30ms = 17.51 (10.41, 25.51)	Repeated measures of Two-Way ANOVA with Sidak's multiple comparisons test	Interaction p<0.0001*** Burst criteria p<0.0001*** Genotype p=0.0010**	WT vs. KO 5 p=0.5590 10 p=0.0061** 15 p=0.0021** 20 p=0.0047** 25 p=0.0127* 30 p=0.0278*
Figure 6-supplementary 2B	in vivo recording	Sigma (Hz)	M	>12wks	WT = 233 neurons/6 mice KO = 258 neurons/8 mice	WT = 2.183 ± 0.08065 KO = 1.933 ± 0.06297	WT = 1.875 (1.193, 2.879) KO = 1.726 (1.159, 2.544)	Mann-Whitney, two-tailed	p=0.0436	*
Figure 6-supplementary 2C	in vivo recording	Firing rate range (Hz)	M	>12wks	WT = 233 neurons/6 mice KO = 258 neurons/8 mice	WT = 13.02 ± 0.4085 KO = 11.38 ± 0.3390	WT = 11.33 (8.000, 17.00) KO = 10.33 (6.917, 14.67)	Mann-Whitney, two-tailed	p=0.0036	**
Figure 6-supplementary 2D	in vivo recording	Maximum Δfiring rate (Hz)	M	>12wks	WT = 233 neurons/6 mice KO = 258 neurons/8 mice	WT = 1.105 ± 0.07078 KO = 0.9805 ± 0.05685	WT = 0.7544 (0.3647, 1.401) KO = 0.6208 (0.3724, 1.273)	Mann-Whitney, two-tailed	p=0.3928	ns
Figure 6-supplementary 2E	in vivo recording	Maximum Δfiring rate (Hz)	M	>12wks	WT = 233 neurons/6 mice KO = 258 neurons/8 mice	WT = 1.602 ± 0.1038 KO = 1.277 ± 0.06884	WT = 1.152 (0.6064, 2.136) KO = 0.9734 (0.4945, 1.633)	Mann-Whitney, two-tailed	p=0.0301	*
Figure 6-supplementary 2F	in vivo recording	Decoding accuracy (%)	M	>12wks	WT = 100 trials/157 neurons/6 mice KO = 100 trials/157 neurons/8 mice WT tonic = 100 trials/157 neurons/6 mice KO tonice = 100 trials/157 neurons/8 mice	WT = 90.00 ± 0.7555 KO = 88.90 ± 0.7964 WT tonic = 89.90 ± 0.7106 KO tonic = 87.45 ± 0.8087	WT = 90.00 (85.00, 95.00) KO = 90.00 (85.00, 95.00) WT tonic = 90.00 (85.00, 95.00) KO tonic = 90.00 (80.00, 95.00)	Repeated measures of Two-Way ANOVA	Interaction p=0.3805 Burst presence p=0.3140 Genotype p=0.0215*
Figure 6-supplementary 2G	in vivo recording	Decoding accuracy (%)	M	>12wks	WT = 100 trials/57 neurons/6 mice KO = 100 trials/57 neurons/8 mice WT tonic = 100 trials/57 neurons/6 mice KO tonice = 100 trials/57 neurons/8 mice	WT = 98.25 ± 0.3981 KO = 92.20 ± 0.7795 WT tonic = 98.20 ± 0.3728 KO tonic = 91.40 ± 0.7180	WT = 100.00 (96.25, 100.00) KO = 95.00 (85.00, 100.00) WT tonic = 100.00 (100.00, 100.00) KO tonic = 92.50 (86.25, 95.00)	Repeated measures of Two-Way ANOVA	Interaction p=0.5296 Burst presence p=0.4762 Genotype p<0.0001***
Figure 6-supplementary 2I	in vivo recording	Sigma (Hz)	M	>12wks	WT = 233 neurons/6 mice KO = 258 neurons/8 mice	WT = 0.4073 ± 0.02859 KO = 0.3391 ± 0.02632	WT = 0.2703 (0.1577, 0.5050) KO = 0.2183 (0.1273, 0.3929)	Mann-Whitney, two-tailed	p=0.0206	*
Figure 6-supplementary 2J	in vivo recording	Firing rate range (Hz)	M	>12wks	WT = 233 neurons/6 mice KO = 258 neurons/8 mice	WT = 3.197 ± 0.1785 KO = 2.720 ± 0.1654	WT = 2.333 (1.333, 4.333) KO = 2.000 (1.333, 3.333)	Mann-Whitney, two-tailed	p=0.0146	*
Figure 6-supplementary 2K	in vivo recording	Maximum Δfiring rate (Hz)	M	>12wks	WT = 233 neurons/6 mice KO = 258 neurons/8 mice	WT = 0.2186 ± 0.02954 KO = 0.1465 ± 0.01344	WT = 0.08612 (0.03213, 0.2233) KO = 0.06425 (0.01480, 0.2011)	Mann-Whitney, two-tailed	p=0.0233	*
Figure 6-supplementary 2L	in vivo recording	Maximum Δfiring rate (Hz)	M	>12wks	WT = 233 neurons/6 mice KO = 258 neurons/8 mice	WT = 0.2655 ± 0.03054 KO = 0.1904 ± 0.01747	WT = 1.152 (0.6064, 2.136) KO = 0.9734 (0.4945, 1.633)	Mann-Whitney, two-tailed	p=0.0346	*
Figure 6-supplementary 2M	in vivo recording	Decoding accuracy (%)	M	>12wks	WT = 100 trials/157 neurons/6 mice KO = 100 trials/157 neurons/8 mice WT tonic = 100 trials/157 neurons/6 mice KO tonice = 100 trials/157 neurons/8 mice	WT = 90.00 ± 0.7555 KO = 88.90 ± 0.7964 WT tonic = 89.90 ± 0.7106 KO tonic = 87.45 ± 0.8087	WT = 90.00 (85.00, 95.00) KO = 90.00 (85.00, 95.00) WT tonic = 90.00 (85.00, 95.00) KO tonic = 90.00 (80.00, 95.00)	Repeated measures of Two-Way ANOVA with Tukey's multiple comparisons test	Interaction p<0.0001*** Burst presence p<0.0001*** Genotype p<0.0001***	WT vs. KO p=0.8261 WT vs. WT burst p=0.8120 WT vs. KO burst p<0.0001*** KO vs. WT burst p>0.9999 KO vs. KO burst p<0.0001*** WT burst vs. KO burst p<0.0001***
Figure 6-supplementary 2N	in vivo recording	Decoding accuracy (%)	M	>12wks	WT = 100 trials/57 neurons/6 mice KO = 100 trials/57 neurons/8 mice WT tonic = 97 trials/57 neurons/6 mice KO tonice = 99 trials/57 neurons/8 mice	WT = 83.00 ± 1.121 KO = 72.90 ± 1.205 WT tonic = 82.10 ± 1.244 KO tonic = 69.30 ± 1.053	WT = 85.00 (75.00, 90.00) KO = 72.50 (65.00, 80.00) WT tonic = 85.00 (73.61, 90.00) KO tonic = 70.00 (65.00, 75.00)	Repeated measures of Two-Way ANOVA	Interaction p=0.2448 Burst presence p=0.0530 Genotype p<0.0001***
Figure 7-supplementary 1A	slice electrophysiology	Number of spikes	M	>12wks	WT = 24 neurons/3 mice KO = 23 neurons/3 mice	WT 0pA = 0.000 ± 0.000 WT 50pA = 0.04167 ± 0.04167 WT 100pA = 0.1250 ± 0.09153 WT 150pA = 1.125 ± 0.3577 WT 200pA = 2.792 ± 0.6312 WT 250pA = 4.625 ± 0.8572 WT 300pA = 6.833 ± 0.9162 WT 350pA = 8.917 ± 0.9458 WT 400pA = 10.46 ± 0.7962 KO 0pA = 0.000 ± 0.000 KO 50pA = 0.000 ± 0.000 KO 100pA = 0.1739 ± 0.1201 KO 150pA = 1.217 ± 0.4072 KO 200pA = 2.913 ± 0.6253 KO 250pA = 4.870 ± 0.7604 KO 300pA = 6…	WT 0pA = 0.000 (0.000, 0.000) WT 50pA = 0.000 (0.000, 0.000) WT 100pA = 0.000 (0.000, 0.000) WT 150pA = 0.000 (0.000, 2.000) WT 200pA = 2.000 (0.000, 5.000) WT 250pA = 4.000 (1.000, 7.750) WT 300pA = 6.500 (4.000, 9.750) WT 350pA = 8.500 (6.000, 11.00) WT 400pA = 10.50 (8.250, 13.00) KO 0pA = 0.000 (0.000, 0.000) KO 50pA = 0.000 (0.000, 0.000) KO 100pA = 0.000 (0.000, 0.000) KO 150pA = 0.000 (0.0…	Repeated measures of Two-Way ANOVA	Interaction p=0.9989 Current p<0.0001*** Genotype p=0.9949
Figure 7-supplementary 1B	in vivo recording	Input resistance (MOhm)	M	>12wks	WT = 24 neurons/3 mice WT+mem=18 neurons/3 mice KO = 23 neurons/3 mice KO+mem = 17 neurons/3 mice	WT = 87.07 ± 5.823 WT+mem = 92.30 ± 6.668 KO = 101.5 ± 5.010 KO+mem = 88.49 ± 7.773	WT = 82.33 (65.25, 99.82) WT+mem = 88.71 (75.15, 120.5) KO = 103.9 (83.88, 123.2) KO+mem = 92.86 (58.34, 106.1)	Repeated measures of Two-Way ANOVA	Interaction p=0.1508 Drug p=0.5365 Genotype p=0.4000
Figure 7-supplementary 1C	in vivo recording	AP threshold (mV)	M	>12wks	WT = 24 neurons/3 mice WT+mem=18 neurons/3 mice KO = 23 neurons/3 mice KO+mem = 17 neurons/3 mice	WT = -39.73 ± 1.042 WT+mem = -40.49 ± 1.239 KO = -40.54 ± 1.401 KO+mem = -42.33 ± 1.467	WT = -39.31 (-43.59, -34.90) WT+mem = -40.12 (-44.40, -36.25) KO = -40.10 (-43.00, -36.44) KO+mem = -41.29 (-44.14, -37.78)	Repeated measures of Two-Way ANOVA	Interaction p=0.4187 Drug p=0.2115 Genotype p=0.4149
Figure 7-supplementary 1D	in vivo recording	AP amplitude (mV)	M	>12wks	WT = 24 neurons/3 mice WT+mem=18 neurons/3 mice KO = 23 neurons/3 mice KO+mem = 17 neurons/3 mice	WT = 76.81 ± 2.217 WT+mem = 75.35 ± 1.817 KO = 69.76 ± 2.811 KO+mem = 81.60 ± 1.483	WT = 78.61 (73.84, 85.46) WT+mem = 77.55 (72.62, 80.28) KO = 70.62 (60.52, 78.13) KO+mem = 83.59 (77.68, 86.01)	Repeated measures of Two-Way ANOVA with Sidak's multiple comparisons test	Interaction p=0.0051** Drug p=0.0272* Genotype p=0.8635	WT vs. KO p=0.1249 WT vs. WT+mem p=0.9983 WT vs. KO+mem p=0.6152 KO vs. WT+mem p=0.4300 KO vs. KO+mem p=0.0035** WT+mem vs. KO+mem p=0.3839
Figure 7-supplementary 1E	in vivo recording	FWHM (ms)	M	>12wks	WT = 24 neurons/3 mice WT+mem=18 neurons/3 mice KO = 23 neurons/3 mice KO+mem = 17 neurons/3 mice	WT = 1.287 ± 0.04577 WT+mem = 1.596 ± 0.1410 KO = 1.400 ± 0.07173 KO+mem = 1.475 ± 0.08584	WT = 1.194 (1.113, 1.479) WT+mem = 1.485 (1.214, 1.687) KO = 1.342 (1.220, 1.488) KO+mem = 1.422 (1.130, 1.823)	Repeated measures of Two-Way ANOVA	Interaction p=0.1830 Drug p=0.0306* Genotype p=0.9631
Figure 7-supplementary 1F	in vivo recording	AHP amplitude (mV)	M	>12wks	WT = 24 neurons/3 mice WT+mem=18 neurons/3 mice KO = 23 neurons/3 mice KO+mem = 17 neurons/3 mice	WT = 3.806 ± 0.6890 WT+mem = 4.639 ± 0.3878 KO = 4.535 ± 0.7418 KO+mem = 4.188 ± 0.5378	WT = 4.532 (3.624, 5.379) WT+mem = 4.379 (3.365, 6.256) KO = 5.615 (2.686, 6.470) KO+mem = 4.639 (2.396, 5.524)	Repeated measures of Two-Way ANOVA	Interaction p=0.3685 Drug p=0.7107 Genotype p=0.8312
Figure 7-supplementary 1H	slice electrophysiology	Burst proportion (%)	M	>12wks	WT = 24 neurons/3 mice KO = 23 neurons/3 mice	WT 50pA = 0.000 ± 0.000 WT 100pA = 0.000 ± 0.000 WT 150pA = 11.11 ± 7.349 WT 200pA = 6.327 ± 3.521 WT 250pA = 8.426 ± 5.401 WT 300pA = 8.799 ± 2.826 WT 350pA = 14.43 ± 4.369 WT 400pA = 13.29 ± 2.440 KO 100pA = 0.000 ± 0.000 KO 150pA = 0.000 ± 0.000 KO 200pA = 1.563 ± 1.563 KO 250pA = 2.556 ± 1.787 KO 300pA = 2.804 ± 1.548 KO 350pA = 9.910 ± 4.624 KO 400pA = 7.373 ± 1.991	WT 50pA = 0.000 (0.000, 0.000) WT 100pA = 0.000 (0.000, 0.000) WT 150pA = 0.000 (0.000, 25.00) WT 200pA = 0.000 (0.000, 5.000) WT 250pA = 0.000 (0.000, 0.000) WT 300pA = 0.000 (0.000, 17.50) WT 350pA = 13.96 (0.000, 23.30) WT 400pA = 15.19 (0.000, 20.00) KO 100pA = 0.000 (0.000, 0.000) KO 150pA = 0.000 (0.000, 0.000) KO 200pA = 0.000 (0.000, 0.000) KO 250pA = 0.000 (0.000, 0.000) KO 300pA = 0.000…	Mixed-effects ANOVA	Current p=0.0655 Genotype p=0.0860
